# Supplementary material for: Evaluating the impact of Hartree–Fock exact exchange on the performance of global hybrid functionals for the vertical excited-state energies of fused-ring electron acceptors using TD-DFT
Source: Royal Society of Chemistry journal article supplement (doi:10.1039/d2cp02228a), 2022-01-01
Supplement: d2cp02228a1.pdf [file d2cp02228a1.pdf]

Supporting Information

**Evaluating the Impact of Hartree-Fock Exact Exchange on the Performance of Global Hybrid Functionals for the Vertical Excited-State Energies of Fused-Ring Electron Acceptors using TD-DFT**

*Amjad Ali,<sup>a,b</sup> Tanveer Farid,<sup>a,b</sup> Muhammad Imran Rafiq,<sup>b</sup> Baojing Zhou,<sup>b</sup> and Weihua Tang<sup>\*a,b</sup>*

<sup>a</sup>Institute of Flexible electronics (IFE, Future Technologies), Xiamen University, Xiamen 361005, P. R. China; [orcid.org/0000-0002-7539-9322](https://orcid.org/0000-0002-7539-9322).

<sup>b</sup>School of Chemical Engineering, Nanjing University of Science and Technology, Nanjing 210094, P. R. China.

\*Corresponding author. E-mail: [whtang@xmu.edu.cn](mailto:whtang@xmu.edu.cn)

**Table S1** Experimental excitation energies ( $E_{\text{max-exp}}$  in eV) and theoretical vertical transition energies ( $E_{\text{ver-theo}}$  in eV) of all FREAs computed with PCM-TD-DFT/6-31G(d,p) and exchange-correlation functionals in chloroform solvent

| Molecule  | $E_{\text{ver-theo}}$ |         |      |      |          |         | $E_{\text{max-exp}}$ |            |
|-----------|-----------------------|---------|------|------|----------|---------|----------------------|------------|
|           | B3PW91                | mPW3PBE | B971 | B972 | mPW1PW91 | mPW1LYP | mPW1PBE              | Experiment |
| F(DPP)2B2 | 1.88                  | 1.88    | 1.90 | 1.91 | 1.97     | 1.96    | 1.97                 | 2.02       |
| Cz-RH     | 2.28                  | 2.28    | 2.30 | 2.31 | 2.38     | 2.37    | 2.38                 | 2.48       |
| Flu-RH    | 2.20                  | 2.20    | 2.22 | 2.23 | 2.30     | 2.28    | 2.30                 | 2.48       |
| FRd2      | 2.12                  | 2.12    | 2.14 | 2.15 | 2.23     | 2.21    | 2.23                 | 2.44       |
| ITDI      | 1.74                  | 1.74    | 1.76 | 1.77 | 1.83     | 1.82    | 1.83                 | 1.92       |
| SiIDT-IC  | 1.97                  | 1.97    | 1.99 | 2.00 | 2.05     | 2.04    | 2.05                 | 1.94       |
| IDIDT-C8  | 1.74                  | 1.74    | 1.76 | 1.77 | 1.85     | 1.85    | 1.85                 | 1.89       |
| IDT-BOC6  | 1.72                  | 1.72    | 1.74 | 1.75 | 1.84     | 1.83    | 1.84                 | 1.80       |
| ATT1      | 1.67                  | 1.67    | 1.68 | 1.69 | 1.75     | 1.74    | 1.75                 | 1.80       |
| DC-IDT2T  | 1.66                  | 1.66    | 1.68 | 1.68 | 1.75     | 1.74    | 1.75                 | 1.77       |
| BZIC      | 1.79                  | 1.79    | 1.80 | 1.81 | 1.85     | 1.84    | 1.85                 | 1.75       |
| ITOIC     | 1.66                  | 1.66    | 1.67 | 1.68 | 1.74     | 1.73    | 1.74                 | 1.72       |
| IDTOT2F   | 1.63                  | 1.63    | 1.64 | 1.65 | 1.71     | 1.70    | 1.71                 | 1.72       |
| ITOIC-F   | 1.66                  | 1.66    | 1.67 | 1.68 | 1.74     | 1.73    | 1.74                 | 1.69       |
| ITOIC-2F  | 1.63                  | 1.63    | 1.65 | 1.66 | 1.72     | 1.71    | 1.72                 | 1.68       |
| IEICO     | 1.45                  | 1.45    | 1.46 | 1.47 | 1.53     | 1.52    | 1.53                 | 1.58       |
| ATT2      | 1.49                  | 1.49    | 1.50 | 1.50 | 1.56     | 1.55    | 1.56                 | 1.57       |
| IEICO-4F  | 1.43                  | 1.43    | 1.44 | 1.44 | 1.50     | 1.49    | 1.50                 | 1.54       |
| m-ITIC    | 1.81                  | 1.81    | 1.82 | 1.83 | 1.89     | 1.88    | 1.89                 | 1.88       |
| IT-DM     | 1.82                  | 1.82    | 1.83 | 1.84 | 1.90     | 1.89    | 1.90                 | 1.86       |
| IT-M      | 1.82                  | 1.82    | 1.83 | 1.84 | 1.90     | 1.88    | 1.90                 | 1.86       |
| ITCPTC    | 1.78                  | 1.78    | 1.79 | 1.80 | 1.85     | 1.84    | 1.85                 | 1.83       |
| Cl-ITIC   | 1.78                  | 1.78    | 1.79 | 1.80 | 1.86     | 1.85    | 1.86                 | 1.79       |
| Br-ITIC   | 1.78                  | 1.78    | 1.79 | 1.80 | 1.86     | 1.85    | 1.86                 | 1.79       |
| NFBDT     | 1.74                  | 1.74    | 1.75 | 1.76 | 1.82     | 1.81    | 1.82                 | 1.76       |
| ITIC2     | 1.68                  | 1.68    | 1.70 | 1.71 | 1.77     | 1.76    | 1.77                 | 1.74       |
| ITVFFIC   | 1.64                  | 1.64    | 1.66 | 1.66 | 1.72     | 1.71    | 1.72                 | 1.65       |
| INIC      | 1.73                  | 1.73    | 1.75 | 1.75 | 1.82     | 1.81    | 1.82                 | 1.79       |
| INIC2     | 1.70                  | 1.70    | 1.71 | 1.72 | 1.79     | 1.78    | 1.79                 | 1.76       |
| INIC1     | 1.71                  | 1.71    | 1.72 | 1.73 | 1.80     | 1.78    | 1.80                 | 1.75       |
| INIC3     | 1.71                  | 1.71    | 1.72 | 1.73 | 1.79     | 1.78    | 1.80                 | 1.75       |
| IPIC      | 1.69                  | 1.69    | 1.70 | 1.71 | 1.77     | 1.76    | 1.77                 | 1.63       |
| IPIC-4F   | 1.67                  | 1.67    | 1.68 | 1.69 | 1.75     | 1.74    | 1.75                 | 1.60       |
| IPIC-4Cl  | 1.65                  | 1.65    | 1.66 | 1.67 | 1.73     | 1.72    | 1.73                 | 1.57       |

**Table S2** Experimental  $\lambda_{\max}$  (in nm) and theoretical  $\lambda_{\text{ver-theo}}$  (in nm) of all FREAs computed with PCM-TD-DFT/6-31G(d,p) and exchange-correlation functionals in chloroform solvent

| Molecule  | $\lambda_{\text{ver-theo}}$ |        |         |       |      |      |     | $\lambda_{\max}$ |
|-----------|-----------------------------|--------|---------|-------|------|------|-----|------------------|
|           | B3LYP                       | B3PW91 | mPW3PBE | X3LYP | B971 | B972 | B98 | Experiment       |
| F(DPP)2B2 | 660                         | 658    | 658     | 649   | 654  | 650  | 654 | 615              |
| Cz-RH     | 547                         | 544    | 544     | 538   | 540  | 537  | 541 | 500              |
| Flu-RH    | 566                         | 563    | 563     | 557   | 559  | 556  | 560 | 500              |
| FRd2      | 587                         | 584    | 584     | 577   | 580  | 577  | 581 | 509              |
| ITDI      | 715                         | 711    | 711     | 702   | 706  | 702  | 707 | 647              |
| SiIDT-IC  | 631                         | 628    | 628     | 623   | 624  | 621  | 625 | 639              |
| IDIDT-C8  | 714                         | 712    | 711     | 698   | 703  | 700  | 705 | 655              |
| IDT-BOC6  | 724                         | 720    | 720     | 707   | 712  | 708  | 713 | 688              |
| ATT1      | 745                         | 741    | 741     | 734   | 737  | 732  | 738 | 690              |
| DC-IDT2T  | 749                         | 745    | 745     | 735   | 739  | 736  | 741 | 700              |
| BZIC      | 696                         | 692    | 692     | 688   | 689  | 686  | 690 | 710              |
| ITOIC     | 752                         | 748    | 748     | 739   | 742  | 739  | 744 | 722              |
| IDTOT2F   | 766                         | 762    | 762     | 752   | 755  | 752  | 757 | 723              |
| ITOIC-F   | 751                         | 747    | 747     | 738   | 741  | 738  | 742 | 732              |
| ITOIC-2F  | 763                         | 759    | 759     | 749   | 752  | 749  | 754 | 737              |
| IEICO     | 858                         | 853    | 853     | 843   | 847  | 843  | 849 | 785              |
| ATT2      | 839                         | 833    | 833     | 824   | 828  | 824  | 829 | 791              |
| IEICO-4F  | 875                         | 870    | 870     | 860   | 863  | 860  | 865 | 805              |
| m-ITIC    | 688                         | 686    | 685     | 678   | 681  | 678  | 682 | 660              |
| IT-DM     | 685                         | 683    | 682     | 675   | 678  | 675  | 679 | 665              |
| IT-M      | 686                         | 683    | 683     | 675   | 678  | 675  | 679 | 668              |
| ITCPTC    | 701                         | 698    | 697     | 690   | 693  | 690  | 694 | 678              |
| Cl-ITIC   | 699                         | 696    | 696     | 688   | 691  | 688  | 692 | 691              |
| Br-ITIC   | 700                         | 697    | 697     | 689   | 692  | 689  | 693 | 692              |
| NFBDT     | 715                         | 712    | 712     | 703   | 707  | 704  | 708 | 703              |
| ITIC2     | 739                         | 736    | 736     | 726   | 730  | 727  | 731 | 714              |
| ITVFFIC   | 758                         | 755    | 754     | 745   | 748  | 746  | 749 | 750              |
| INIC      | 720                         | 716    | 715     | 706   | 710  | 707  | 711 | 692              |
| INIC2     | 734                         | 730    | 730     | 720   | 724  | 720  | 725 | 704              |
| INIC1     | 730                         | 726    | 726     | 717   | 720  | 717  | 721 | 710              |
| INIC3     | 730                         | 727    | 726     | 717   | 720  | 717  | 721 | 710              |
| IPIC      | 737                         | 734    | 734     | 725   | 728  | 725  | 729 | 761              |
| IPIC-4F   | 747                         | 744    | 743     | 734   | 737  | 735  | 738 | 776              |
| IPIC-4Cl  | 760                         | 751    | 751     | 741   | 745  | 742  | 746 | 790              |

**Table S3** Experimental  $\lambda_{\max}$  (in nm) and theoretical  $\lambda_{\text{ver-theo}}$  (in nm) of all FREAs computed with PCM-TD-DFT/6-31G(d,p) and exchange-correlation functionals in chloroform solvent

| Molecule | $\lambda_{\text{ver-theo}}$ | $\lambda_{\max}$ |
|----------|-----------------------------|------------------|
|----------|-----------------------------|------------------|

|           | APF/ APFD | PBE0 | mPW1PW91 | mPW1LYP | mPW1PBE | M06 | M05 | M062X | Experiment |
|-----------|-----------|------|----------|---------|---------|-----|-----|-------|------------|
| F(DPP)2B2 | 640       | 628  | 629      | 632     | 629     | 627 | 617 | 555   | 615        |
| Cz-RH     | 529       | 520  | 520      | 524     | 520     | 523 | 515 | 452   | 500        |
| Flu-RH    | 548       | 538  | 539      | 543     | 539     | 542 | 534 | 466   | 500        |
| FRd2      | 567       | 556  | 556      | 561     | 556     | 560 | 553 | 470   | 509        |
| ITDI      | 690       | 676  | 677      | 681     | 677     | 670 | 655 | 568   | 647        |
| SiIDT-IC  | 614       | 605  | 605      | 609     | 605     | 605 | 591 | 532   | 639        |
| IDIDT-C8  | 685       | 668  | 669      | 672     | 669     | 659 | 644 | 536   | 655        |
| IDT-BOC6  | 692       | 674  | 675      | 679     | 675     | 668 | 650 | 535   | 688        |
| ATT1      | 721       | 708  | 708      | 714     | 708     | 708 | 694 | 598   | 690        |
| DC-IDT2T  | 722       | 707  | 708      | 713     | 708     | 700 | 682 | 586   | 700        |
| BZIC      | 678       | 669  | 670      | 674     | 669     | 669 | 652 | 594   | 710        |
| ITOIC     | 726       | 711  | 712      | 717     | 712     | 704 | 687 | 596   | 722        |
| IDTOT2F   | 738       | 723  | 724      | 729     | 724     | 717 | 698 | 603   | 723        |
| ITOIC-F   | 725       | 710  | 711      | 716     | 711     | 704 | 687 | 596   | 732        |
| ITOIC-2F  | 736       | 721  | 722      | 727     | 721     | 714 | 696 | 602   | 737        |
| IEICO     | 828       | 811  | 813      | 818     | 812     | 807 | 787 | 671   | 785        |
| ATT2      | 808       | 792  | 794      | 801     | 793     | 786 | 766 | 664   | 791        |
| IEICO-4F  | 844       | 827  | 829      | 835     | 828     | 825 | 804 | 555   | 805        |
| m-ITIC    | 667       | 656  | 657      | 660     | 656     | 653 | 637 | 452   | 660        |
| IT-DM     | 664       | 652  | 653      | 657     | 653     | 650 | 633 | 466   | 665        |
| IT-M      | 665       | 653  | 654      | 658     | 654     | 651 | 634 | 470   | 668        |
| ITCPTC    | 680       | 668  | 669      | 673     | 669     | 666 | 648 | 568   | 678        |
| Cl-ITIC   | 677       | 665  | 666      | 670     | 666     | 663 | 647 | 532   | 691        |
| Br-ITIC   | 678       | 666  | 667      | 671     | 667     | 665 | 648 | 536   | 692        |
| NFBDT     | 693       | 681  | 682      | 684     | 681     | 680 | 665 | 535   | 703        |
| ITIC2     | 715       | 701  | 702      | 705     | 702     | 700 | 683 | 598   | 714        |
| ITVFFIC   | 733       | 719  | 720      | 724     | 720     | 715 | 694 | 586   | 750        |
| INIC      | 694       | 679  | 680      | 685     | 680     | 674 | 655 | 594   | 692        |
| INIC2     | 707       | 692  | 693      | 698     | 693     | 686 | 667 | 596   | 704        |
| INIC1     | 704       | 689  | 690      | 695     | 690     | 683 | 664 | 603   | 710        |
| INIC3     | 704       | 689  | 691      | 695     | 690     | 684 | 665 | 596   | 710        |
| IPIC      | 713       | 700  | 701      | 705     | 700     | 696 | 679 | 602   | 761        |
| IPIC-4F   | 722       | 708  | 710      | 713     | 709     | 705 | 688 | 671   | 776        |
| IPIC-4Cl  | 729       | 721  | 716      | 720     | 716     | 711 | 694 | 664   | 790        |

**Table S4** Deviation ( $E_{\text{max-exp}} - E_{\text{ver-theo}}$ ) of theoretical value from experimental one for all FREAs<sup>a</sup>

| Molecule | Deviation ( $E_{\text{max-exp}} - E_{\text{ver-theo}}$ ) (eV) |
|----------|---------------------------------------------------------------|
|----------|---------------------------------------------------------------|

|           | B3LYP | B3PW91 | mPW3PBE | X3LYP | B971  | B972  | B98   |
|-----------|-------|--------|---------|-------|-------|-------|-------|
| F(DPP)2B2 | 0.14  | 0.14   | 0.14    | 0.11  | 0.12  | 0.11  | 0.12  |
| Cz-RH     | 0.21  | 0.2    | 0.2     | 0.18  | 0.18  | 0.17  | 0.19  |
| Flu-RH    | 0.29  | 0.28   | 0.28    | 0.25  | 0.26  | 0.25  | 0.27  |
| FRd2      | 0.33  | 0.32   | 0.32    | 0.29  | 0.3   | 0.29  | 0.31  |
| ITDI      | 0.19  | 0.18   | 0.18    | 0.15  | 0.16  | 0.15  | 0.17  |
| SiIDT-IC  | -0.03 | -0.03  | -0.03   | -0.05 | -0.05 | -0.06 | -0.04 |
| IDIDT-C8  | 0.15  | 0.15   | 0.15    | 0.11  | 0.13  | 0.12  | 0.13  |
| IDT-BOC6  | 0.09  | 0.08   | 0.08    | 0.05  | 0.06  | 0.05  | 0.06  |
| ATT1      | 0.14  | 0.13   | 0.13    | 0.11  | 0.12  | 0.11  | 0.12  |
| DC-IDT2T  | 0.11  | 0.11   | 0.11    | 0.08  | 0.09  | 0.09  | 0.1   |
| BZIC      | -0.03 | -0.04  | -0.04   | -0.05 | -0.05 | -0.06 | -0.05 |
| ITOIC     | 0.07  | 0.06   | 0.06    | 0.04  | 0.05  | 0.04  | 0.05  |
| IDTOT2F   | 0.1   | 0.09   | 0.09    | 0.07  | 0.08  | 0.07  | 0.08  |
| ITOIC-F   | 0.04  | 0.03   | 0.03    | 0.01  | 0.02  | 0.01  | 0.02  |
| ITOIC-2F  | 0.05  | 0.05   | 0.05    | 0.02  | 0.03  | 0.02  | 0.04  |
| IEICO     | 0.13  | 0.13   | 0.13    | 0.11  | 0.12  | 0.11  | 0.12  |
| ATT2      | 0.09  | 0.08   | 0.08    | 0.07  | 0.07  | 0.07  | 0.07  |
| IEICO-4F  | 0.12  | 0.11   | 0.11    | 0.1   | 0.1   | 0.1   | 0.11  |
| m-ITIC    | 0.08  | 0.07   | 0.07    | 0.05  | 0.06  | 0.05  | 0.06  |
| IT-DM     | 0.05  | 0.04   | 0.04    | 0.02  | 0.03  | 0.02  | 0.03  |
| IT-M      | 0.05  | 0.04   | 0.04    | 0.02  | 0.03  | 0.02  | 0.03  |
| ITCPTC    | 0.06  | 0.05   | 0.05    | 0.03  | 0.04  | 0.03  | 0.04  |
| Cl-ITIC   | 0.02  | 0.01   | 0.01    | -0.01 | 0     | -0.01 | 0     |
| Br-ITIC   | 0.02  | 0.01   | 0.01    | -0.01 | 0     | -0.01 | 0     |
| NFBDT     | 0.03  | 0.02   | 0.02    | 0     | 0.01  | 0     | 0.01  |
| ITIC2     | 0.06  | 0.06   | 0.06    | 0.03  | 0.04  | 0.03  | 0.04  |
| ITVFFIC   | 0.01  | 0.01   | 0.01    | -0.01 | -0.01 | -0.01 | -0.01 |
| INIC      | 0.07  | 0.06   | 0.06    | 0.03  | 0.04  | 0.04  | 0.05  |
| INIC2     | 0.07  | 0.06   | 0.06    | 0.04  | 0.05  | 0.04  | 0.05  |
| INIC1     | 0.05  | 0.04   | 0.04    | 0.02  | 0.03  | 0.02  | 0.03  |
| INIC3     | 0.05  | 0.04   | 0.04    | 0.02  | 0.03  | 0.02  | 0.03  |
| IPIC      | -0.05 | -0.06  | -0.06   | -0.08 | -0.07 | -0.08 | -0.07 |
| IPIC-4F   | -0.06 | -0.07  | -0.07   | -0.09 | -0.08 | -0.09 | -0.08 |
| IPIC-4Cl  | -0.06 | -0.08  | -0.08   | -0.1  | -0.09 | -0.1  | -0.09 |

<sup>a</sup>  $E_{\text{ver-theo}}$  and  $E_{\text{max-exp}}$  are the theoretical vertical and experimental maximum excitation energies, respectively.

**Table S5** Deviation ( $E_{\text{max-exp}} - E_{\text{ver-theo}}$ ) of theoretical value from experimental one for all FREAs<sup>a</sup>

| Molecule | Deviation ( $E_{\text{max-exp}} - E_{\text{ver-theo}}$ ) (eV) |
|----------|---------------------------------------------------------------|
|----------|---------------------------------------------------------------|

|           | APF /APFD | PBE0  | mPW1PW91 | mPW1LYP | mPW1PBE | M06   | M05   | M06-2X |
|-----------|-----------|-------|----------|---------|---------|-------|-------|--------|
| F(DPP)2B2 | 0.08      | 0.05  | 0.05     | 0.06    | 0.05    | 0.04  | 0.01  | -0.22  |
| Cz-RH     | 0.14      | 0.10  | 0.1      | 0.11    | 0.1     | 0.11  | 0.07  | -0.26  |
| Flu-RH    | 0.22      | 0.18  | 0.18     | 0.2     | 0.18    | 0.19  | 0.16  | -0.18  |
| FRd2      | 0.25      | 0.21  | 0.21     | 0.23    | 0.21    | 0.23  | 0.2   | -0.2   |
| ITDI      | 0.12      | 0.09  | 0.09     | 0.1     | 0.09    | 0.07  | 0.03  | -0.26  |
| SiIDT-IC  | -0.08     | -0.11 | -0.11    | -0.1    | -0.11   | -0.11 | -0.16 | -0.39  |
| IDIDT-C8  | 0.08      | 0.03  | 0.04     | 0.04    | 0.04    | 0.01  | -0.04 | -0.42  |
| IDT-BOC6  | 0.01      | -0.04 | -0.04    | -0.03   | -0.04   | -0.06 | -0.11 | -0.52  |
| ATT1      | 0.08      | 0.05  | 0.05     | 0.06    | 0.05    | 0.05  | 0.01  | -0.27  |
| DC-IDT2T  | 0.05      | 0.02  | 0.02     | 0.03    | 0.02    | 0     | -0.05 | -0.35  |
| BZIC      | -0.08     | -0.10 | -0.1     | -0.09   | -0.1    | -0.1  | -0.15 | -0.34  |
| ITOIC     | 0.01      | -0.02 | -0.02    | -0.01   | -0.02   | -0.04 | -0.08 | -0.36  |
| IDTOT2F   | 0.04      | 0.00  | 0.01     | 0.02    | 0.01    | -0.01 | -0.06 | -0.34  |
| ITOIC-F   | -0.02     | -0.06 | -0.05    | -0.04   | -0.05   | -0.07 | -0.11 | -0.39  |
| ITOIC-2F  | 0         | -0.04 | -0.04    | -0.03   | -0.04   | -0.06 | -0.1  | -0.38  |
| IEICO     | 0.08      | 0.05  | 0.05     | 0.06    | 0.05    | 0.04  | 0     | -0.27  |
| ATT2      | 0.04      | 0.00  | 0.01     | 0.02    | 0.01    | -0.01 | -0.05 | -0.3   |
| IEICO-4F  | 0.07      | 0.04  | 0.04     | 0.05    | 0.04    | 0.04  | 0     | -0.27  |
| m-ITIC    | 0.02      | -0.01 | -0.01    | 0       | -0.01   | -0.02 | -0.07 | -0.33  |
| IT-DM     | -0.01     | -0.04 | -0.04    | -0.03   | -0.04   | -0.05 | -0.1  | -0.36  |
| IT-M      | 0         | -0.04 | -0.04    | -0.02   | -0.04   | -0.04 | -0.1  | -0.36  |
| ITCPTC    | 0.01      | -0.03 | -0.02    | -0.01   | -0.02   | -0.03 | -0.08 | -0.34  |
| Cl-ITIC   | -0.04     | -0.07 | -0.07    | -0.06   | -0.07   | -0.08 | -0.13 | -0.39  |
| Br-ITIC   | -0.04     | -0.07 | -0.07    | -0.06   | -0.07   | -0.07 | -0.12 | -0.39  |
| NFBDT     | -0.03     | -0.06 | -0.06    | -0.05   | -0.06   | -0.06 | -0.1  | -0.37  |
| ITIC2     | 0.01      | -0.03 | -0.03    | -0.02   | -0.03   | -0.03 | -0.08 | -0.36  |
| ITVFFIC   | -0.04     | -0.07 | -0.07    | -0.06   | -0.07   | -0.08 | -0.14 | -0.4   |
| INIC      | 0         | -0.04 | -0.03    | -0.02   | -0.03   | -0.05 | -0.1  | -0.4   |
| INIC2     | 0.01      | -0.03 | -0.03    | -0.02   | -0.03   | -0.05 | -0.1  | -0.4   |
| INIC1     | -0.01     | -0.05 | -0.05    | -0.03   | -0.05   | -0.07 | -0.12 | -0.41  |
| INIC3     | -0.01     | -0.05 | -0.04    | -0.03   | -0.05   | -0.06 | -0.11 | -0.41  |
| IPIC      | -0.11     | -0.14 | -0.14    | -0.13   | -0.14   | -0.15 | -0.2  | -0.44  |
| IPIC-4F   | -0.12     | -0.15 | -0.15    | -0.14   | -0.15   | -0.16 | -0.2  | -0.45  |
| IPIC-4Cl  | -0.13     | -0.15 | -0.16    | -0.15   | -0.16   | -0.17 | -0.22 | -0.46  |

<sup>a</sup>  $E_{\text{ver-theo}}$  and  $E_{\text{max-exp}}$  are theoretical vertical and experimental maximum excitation energies, respectively.

**Table S6** Charge transfer calculated with B3LYP <sup>a</sup>, APF, and PBE0<sup>a</sup>

| Molecule | B3LYP | APF | PBE0 |
|----------|-------|-----|------|
|----------|-------|-----|------|

---

|          |       |       |       |
|----------|-------|-------|-------|
| NFBDT    | 0.553 | 0.559 | 0.566 |
| ITOIC-2F | 0.637 | 0.642 | 0.648 |
| INIC2    | 0.647 | 0.651 | 0.656 |
| IEICO-4F | 0.6   | 0.613 | 0.626 |
| DC-IDT2T | 0.647 | 0.650 | 0.659 |
| IPIC     | 0.598 | 0.605 | 0.609 |
| IPIC-4F  | 0.6   | 0.607 | 0.611 |
| IT-DM    | 0.593 | 0.598 | 0.605 |
| ITVFFIC  | 0.605 | 0.611 | 0.622 |
| Flu-RH   | 0.521 | 0.523 | 0.527 |

---

<sup>a</sup> The values for B3LYP and PBE0 have been taken from our previous study.<sup>1</sup>

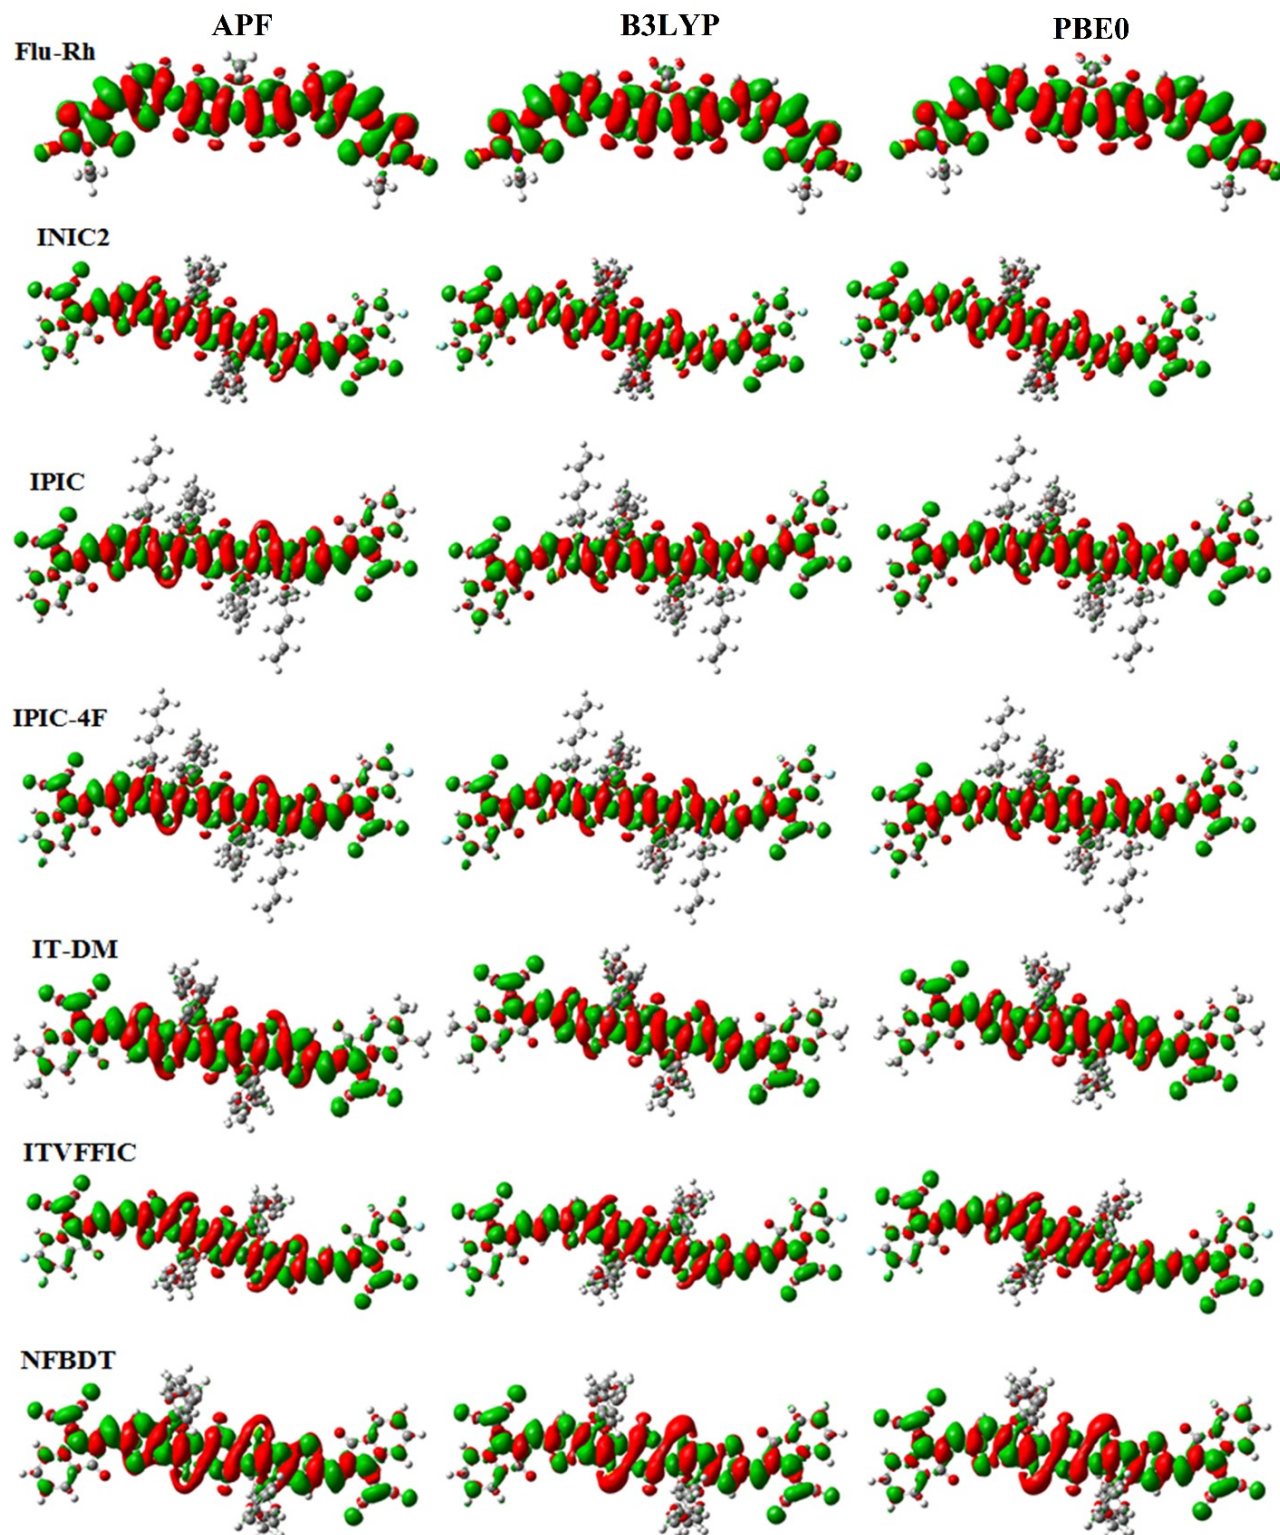

**Fig. S1** Plots of the density difference between the ground and excited states computed for Flu-Rh, INIC2, IPIC, IPIC-4F, IT-DM, ITVFFIC, and NFBDT obtained using PCM-TD-APF, PCM-TD-B3LYP, and PCM-TD-PBE0 (contour threshold: 0.0002 a.u.)



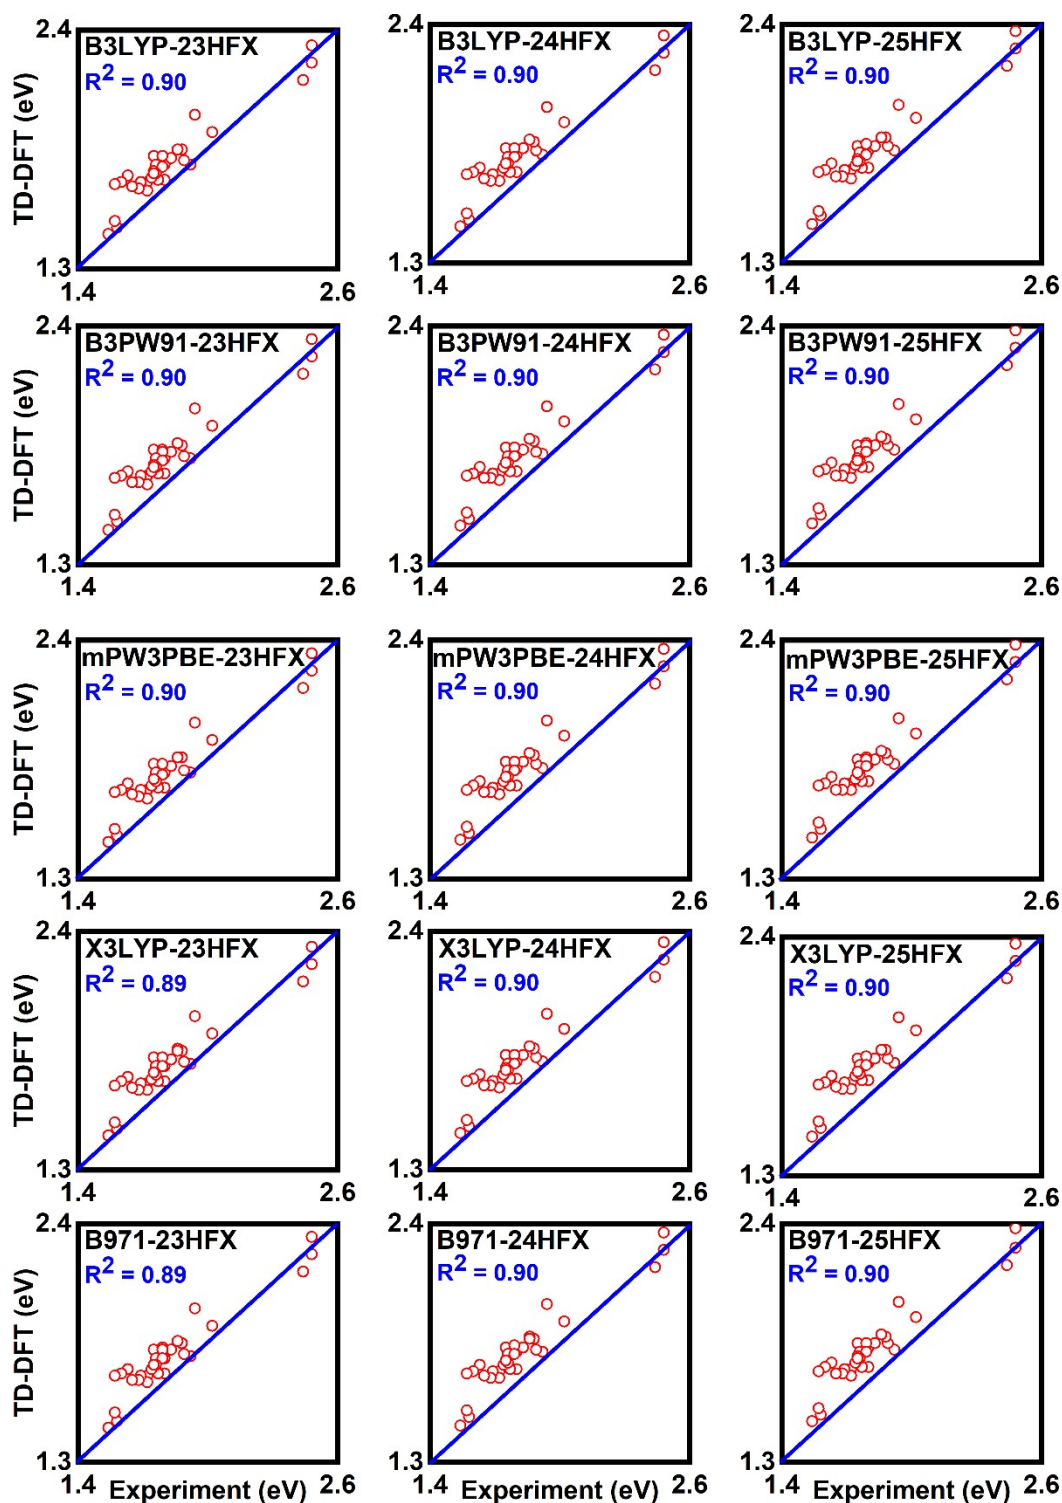

**Fig. S2** Comparison between experimental maximum transition energies ( $E_{\text{max-exp}}$ ) and theoretical vertical excitation energies ( $E_{\text{ver-theo}}$ ) using B3LYP-23HFX, B3LYP-24HFX, B3LYP-25HFX, B3PW91-23HFX, B3PW91-24HFX, B3PW91-25HFX, mPW3PBE-23HFX, mPW3PBE-24HFX, mPW3PBE-25HFX, X3LYP-23HFX, X3LYP-24HFX, X3LYP-25HFX, B971-23HFX, B971-24HFX, and B971-25HFX. The solid line shows the theory-experiment perfect match.  $R^2$  is the determination coefficient.

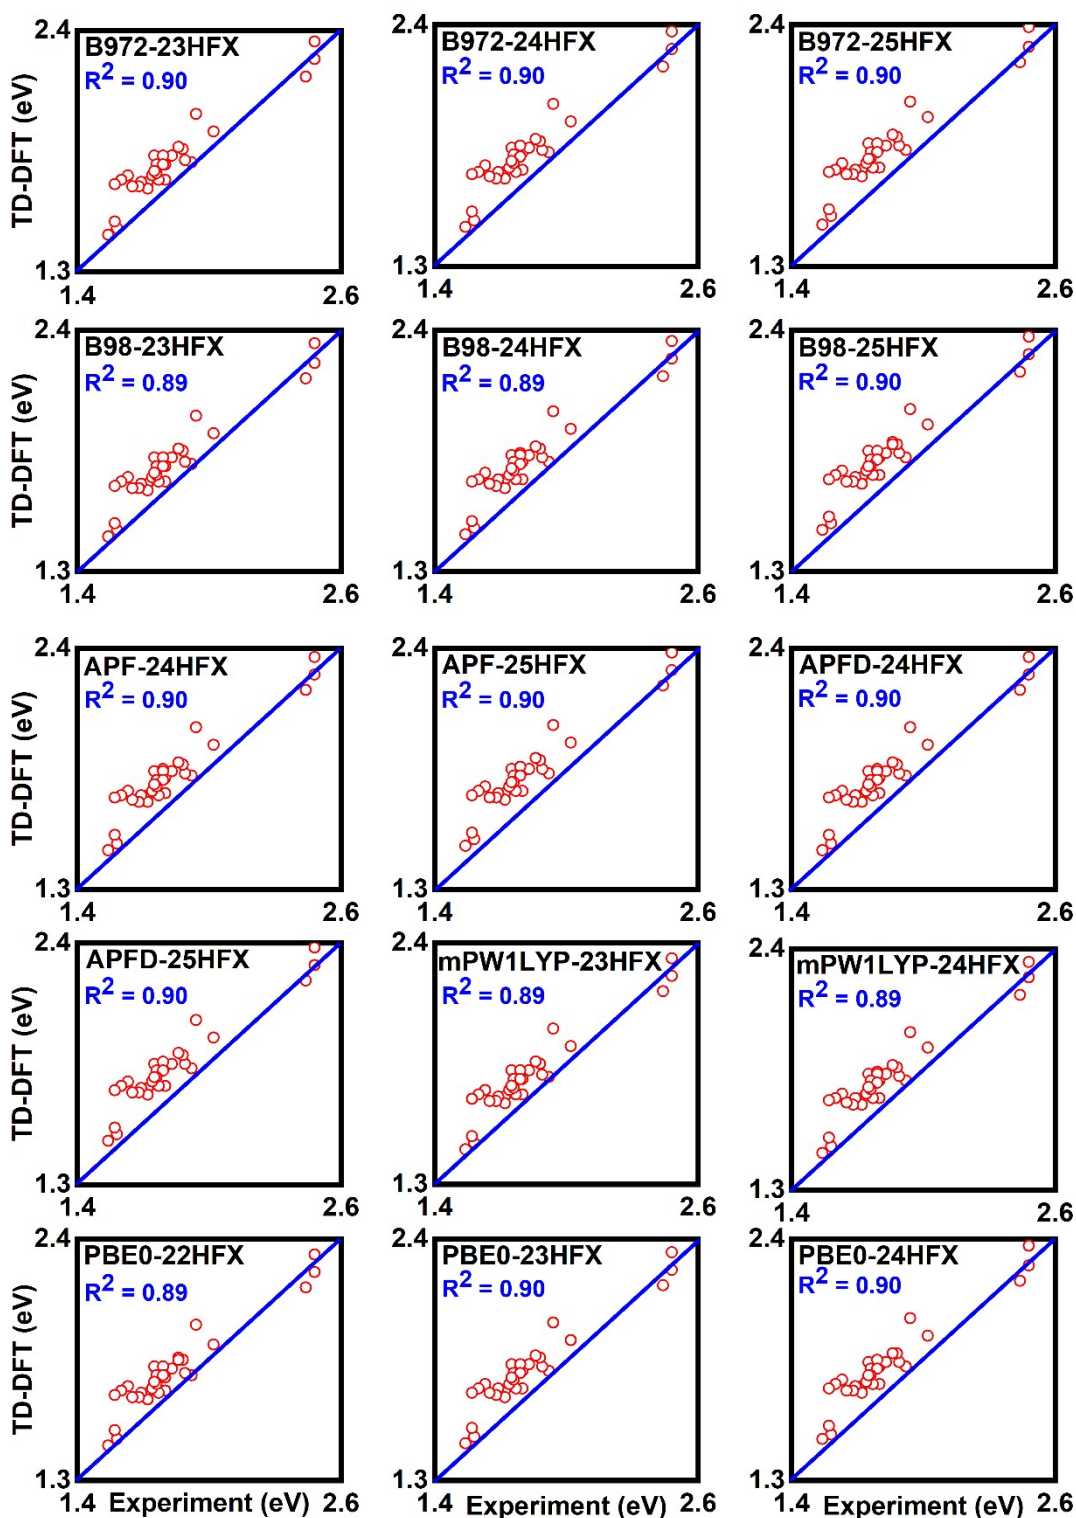

**Fig. S3** Comparison between experimental maximum transition energies ( $E_{\max\text{-exp}}$ ) and theoretical vertical excitation energies ( $E_{\text{ver-theo}}$ ) using B972-23HFX, B972-24HFX, B972-25HFX, B98-23HFX, B98-24HFX, B98-25HFX, APF-24HFX, APF-25HFX, APFD-24HFX, APFD-25HFX, mPW1LYP-23HFX, mPW1LYP-24HFX, PBE0-22HFX, PBE0-23HFX, and PBE0-24HFX. The solid line shows the theory-experiment perfect match.  $R^2$  is the determination coefficient.

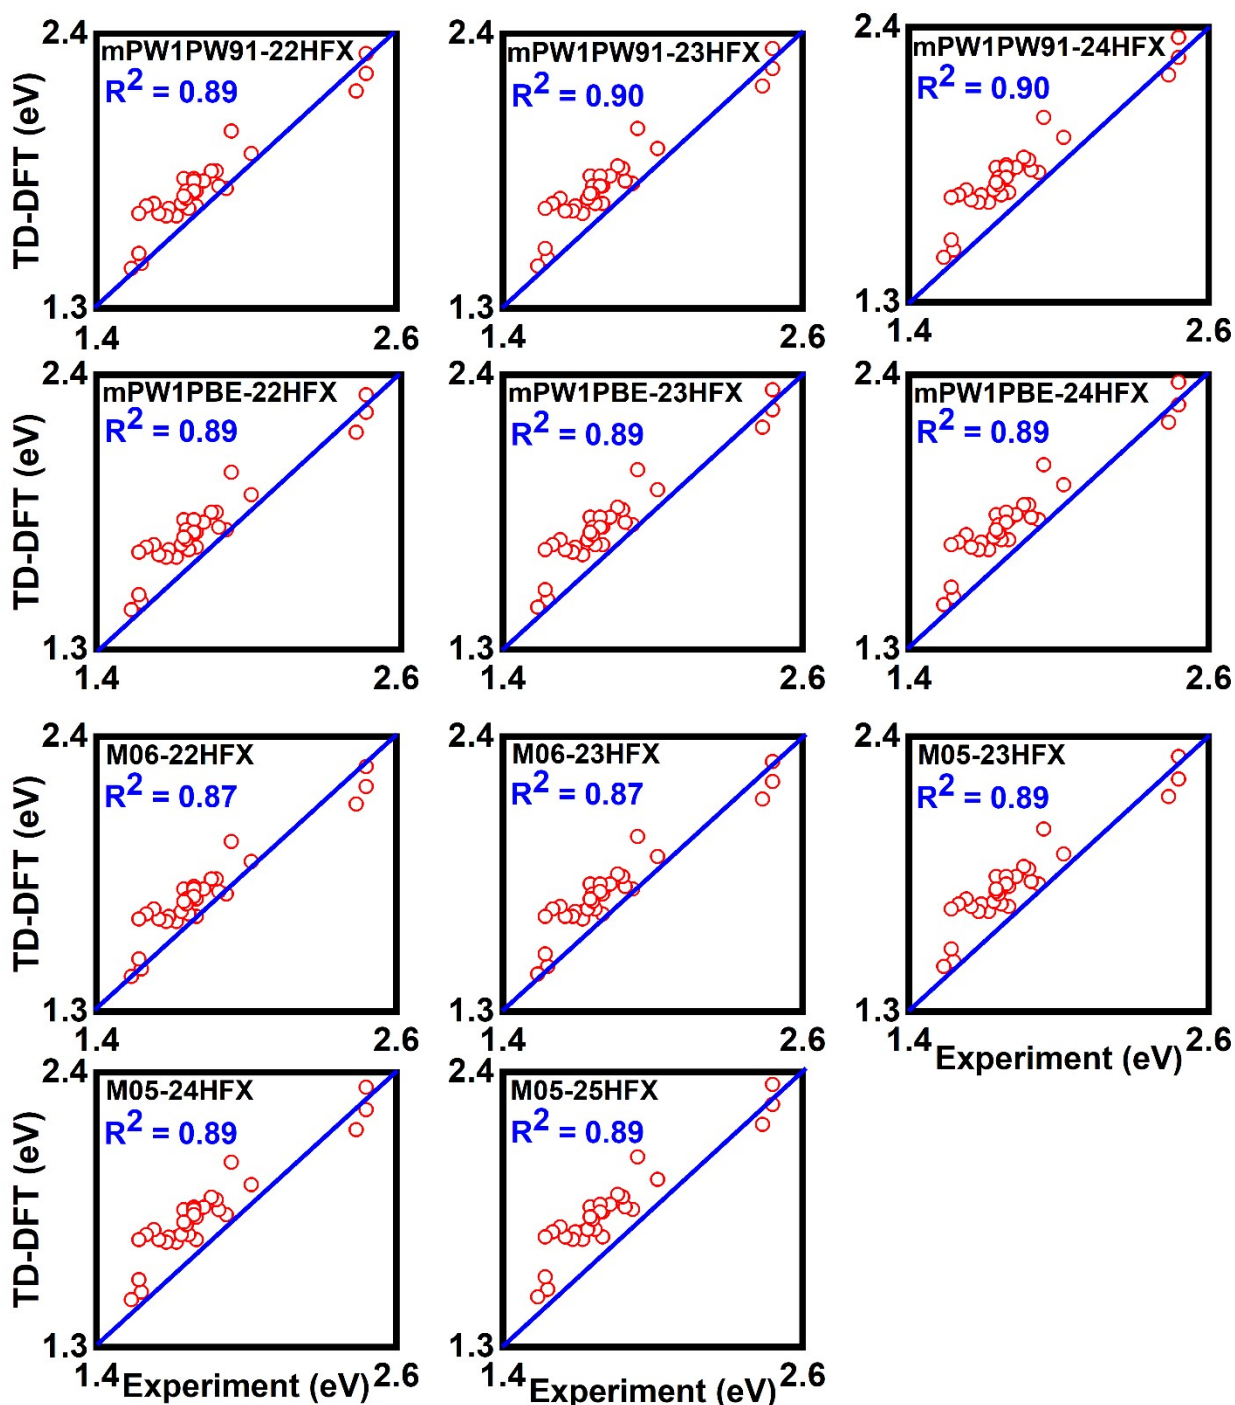

**Fig. S4** Comparison between experimental maximum transition energies ( $E_{\text{max-exp}}$ ) and theoretical vertical excitation energies ( $E_{\text{ver-theo}}$ ) using mPW1PW91-22HFX, mPW1PW91-23HFX, mPW1PW91-24HFX, mPW1PBE-22HFX, mPW1PBE-23HFX, mPW1PBE-24HFX, M06-22HFX, M06-23HFX, M05-23HFX, M05-24HFX and M05-25HFX. The solid line shows the theory-experiment perfect match.  $R^2$  is the determination coefficient.

**Table S7** Experimental maximum absorption wavelengths ( $\lambda_{\text{max}}$  in nm), experimental transition energies ( $E_{\text{max-exp}}$  in eV), theoretical vertical absorption wavelengths ( $\lambda_{\text{ver-theo}}$  in nm), and theoretical vertical transition energies ( $E_{\text{ver-theo}}$  in eV) of all FREAs computed in chloroform with PCM-TD-DFT-XC-HFX/6-31G(d,p)<sup>a</sup>

| Molecule  | $\lambda_{\text{ver-theo}}$ and $E_{\text{ver-theo}}$ |      |             |      |             |      |             |      |             |      |             |      | $\lambda_{\text{max}}$ and $E_{\text{max-exp}}$ |      |
|-----------|-------------------------------------------------------|------|-------------|------|-------------|------|-------------|------|-------------|------|-------------|------|-------------------------------------------------|------|
|           | B3LYP                                                 |      | B3LYP-21HFX |      | B3LYP-22HFX |      | B3LYP-23HFX |      | B3LYP-24HFX |      | B3LYP-25HFX |      | Experiment                                      |      |
|           | nm                                                    | eV   | nm          | eV   | nm          | eV   | nm          | eV   | nm          | eV   | nm          | eV   | nm                                              | eV   |
| F(DPP)2B2 | 660                                                   | 1.88 | 654         | 1.90 | 647         | 1.92 | 641         | 1.93 | 636         | 1.95 | 630         | 1.97 | 615                                             | 2.02 |
| Cz-RH     | 547                                                   | 2.27 | 542         | 2.29 | 537         | 2.31 | 532         | 2.33 | 528         | 2.35 | 524         | 2.37 | 500                                             | 2.48 |
| Flu-RH    | 566                                                   | 2.19 | 561         | 2.21 | 556         | 2.23 | 551         | 2.25 | 547         | 2.27 | 542         | 2.29 | 500                                             | 2.48 |
| FRd2      | 587                                                   | 2.11 | 582         | 2.13 | 576         | 2.15 | 571         | 2.17 | 566         | 2.19 | 562         | 2.21 | 509                                             | 2.44 |
| ITDI      | 715                                                   | 1.73 | 708         | 1.75 | 701         | 1.77 | 695         | 1.78 | 688         | 1.80 | 682         | 1.82 | 647                                             | 1.92 |
| SiIDT-IC  | 631                                                   | 1.97 | 627         | 1.98 | 622         | 1.99 | 618         | 2.01 | 614         | 2.02 | 610         | 2.03 | 639                                             | 1.94 |
| IDIDT-C8  | 714                                                   | 1.74 | 706         | 1.76 | 698         | 1.78 | 690         | 1.80 | 682         | 1.82 | 675         | 1.84 | 655                                             | 1.89 |
| IDT-BOC6  | 724                                                   | 1.71 | 715         | 1.73 | 706         | 1.76 | 697         | 1.78 | 689         | 1.80 | 681         | 1.82 | 688                                             | 1.80 |
| ATT1      | 745                                                   | 1.66 | 739         | 1.68 | 732         | 1.69 | 726         | 1.71 | 719         | 1.72 | 713         | 1.74 | 690                                             | 1.80 |
| DC-IDT2T  | 749                                                   | 1.66 | 742         | 1.67 | 734         | 1.69 | 727         | 1.71 | 720         | 1.72 | 714         | 1.74 | 700                                             | 1.77 |
| BZIC      | 696                                                   | 1.78 | 691         | 1.79 | 687         | 1.80 | 682         | 1.82 | 678         | 1.83 | 674         | 1.84 | 710                                             | 1.75 |
| ITOIC     | 752                                                   | 1.65 | 745         | 1.66 | 738         | 1.68 | 731         | 1.70 | 724         | 1.71 | 717         | 1.73 | 722                                             | 1.72 |
| IDTOT2F   | 766                                                   | 1.62 | 759         | 1.63 | 752         | 1.65 | 745         | 1.66 | 738         | 1.68 | 732         | 1.69 | 723                                             | 1.72 |
| ITOIC-F   | 751                                                   | 1.65 | 744         | 1.67 | 737         | 1.68 | 731         | 1.70 | 724         | 1.71 | 718         | 1.73 | 732                                             | 1.69 |
| ITOIC-2F  | 763                                                   | 1.63 | 756         | 1.64 | 749         | 1.66 | 742         | 1.67 | 736         | 1.68 | 729         | 1.70 | 737                                             | 1.68 |
| IEICO     | 858                                                   | 1.45 | 850         | 1.46 | 841         | 1.47 | 833         | 1.49 | 826         | 1.50 | 818         | 1.52 | 785                                             | 1.58 |
| ATT2      | 839                                                   | 1.48 | 831         | 1.49 | 824         | 1.50 | 817         | 1.52 | 810         | 1.53 | 803         | 1.54 | 791                                             | 1.57 |
| IEICO-4F  | 875                                                   | 1.42 | 867         | 1.43 | 859         | 1.44 | 852         | 1.46 | 844         | 1.47 | 837         | 1.48 | 805                                             | 1.54 |
| m-ITIC    | 688                                                   | 1.80 | 683         | 1.82 | 677         | 1.83 | 672         | 1.85 | 666         | 1.86 | 661         | 1.88 | 660                                             | 1.88 |
| IT-DM     | 685                                                   | 1.81 | 680         | 1.82 | 674         | 1.84 | 669         | 1.85 | 663         | 1.87 | 658         | 1.88 | 665                                             | 1.86 |
| IT-M      | 686                                                   | 1.81 | 680         | 1.82 | 675         | 1.84 | 669         | 1.85 | 664         | 1.87 | 659         | 1.88 | 668                                             | 1.86 |
| ITCPTC    | 701                                                   | 1.77 | 695         | 1.78 | 690         | 1.80 | 684         | 1.81 | 679         | 1.83 | 674         | 1.84 | 678                                             | 1.83 |
| Cl-ITIC   | 699                                                   | 1.77 | 693         | 1.79 | 687         | 1.80 | 682         | 1.82 | 676         | 1.83 | 671         | 1.85 | 691                                             | 1.79 |
| Br-ITIC   | 700                                                   | 1.77 | 694         | 1.79 | 688         | 1.80 | 683         | 1.82 | 677         | 1.83 | 672         | 1.85 | 692                                             | 1.79 |
| NFBBDT    | 715                                                   | 1.73 | 708         | 1.75 | 702         | 1.77 | 697         | 1.78 | 691         | 1.79 | 685         | 1.81 | 703                                             | 1.76 |
| ITIC2     | 739                                                   | 1.68 | 732         | 1.69 | 725         | 1.71 | 719         | 1.72 | 713         | 1.74 | 707         | 1.75 | 714                                             | 1.74 |
| ITVFFIC   | 758                                                   | 1.64 | 752         | 1.65 | 746         | 1.66 | 739         | 1.68 | 734         | 1.69 | 728         | 1.70 | 750                                             | 1.65 |
| INIC      | 720                                                   | 1.72 | 713         | 1.74 | 706         | 1.76 | 699         | 1.77 | 693         | 1.79 | 687         | 1.80 | 692                                             | 1.79 |
| INIC2     | 734                                                   | 1.69 | 727         | 1.71 | 720         | 1.72 | 713         | 1.74 | 706         | 1.76 | 700         | 1.77 | 704                                             | 1.76 |
| INIC1     | 730                                                   | 1.70 | 723         | 1.72 | 716         | 1.73 | 710         | 1.75 | 703         | 1.76 | 697         | 1.78 | 710                                             | 1.75 |
| INIC3     | 730                                                   | 1.70 | 724         | 1.71 | 717         | 1.73 | 711         | 1.74 | 705         | 1.76 | 699         | 1.77 | 710                                             | 1.75 |
| IPIC      | 737                                                   | 1.68 | 731         | 1.70 | 724         | 1.71 | 718         | 1.73 | 711         | 1.74 | 706         | 1.76 | 761                                             | 1.63 |
| IPIC-4F   | 747                                                   | 1.66 | 740         | 1.68 | 734         | 1.69 | 728         | 1.70 | 722         | 1.72 | 716         | 1.73 | 776                                             | 1.60 |
| IPIC-4Cl  | 760                                                   | 1.63 | 753         | 1.66 | 746         | 1.68 | 740         | 1.69 | 733         | 1.71 | 727         | 1.72 | 790                                             | 1.57 |

<sup>a</sup>XC and HFX in PCM-TD-DFT-XC-HFX/6-31G(d,p) denote the exchange-correlation functional and percentage of Hartree-Fock exact-exchange, respectively.

**Table S8** Experimental maximum absorption wavelengths ( $\lambda_{\max}$  in nm), experimental transition energies ( $E_{\max\text{-exp}}$  in eV), theoretical vertical absorption wavelengths ( $\lambda_{\text{ver-theo}}$  in nm), and theoretical vertical transition energies ( $E_{\text{ver-theo}}$  in eV) of all FREAs computed in chloroform with PCM-TD-DFT-XC-HFX/6-31G(d,p)<sup>a</sup>

| Molecule    | $\lambda_{\text{ver-theo}}$ and $E_{\text{ver-theo}}$ |      |              |      |              |      |              |      |              |      |              |      | $\lambda_{\max}$ and $E_{\max\text{-exp}}$ |      |
|-------------|-------------------------------------------------------|------|--------------|------|--------------|------|--------------|------|--------------|------|--------------|------|--------------------------------------------|------|
|             | B3PW91                                                |      | B3PW91-21HFX |      | B3PW91-22HFX |      | B3PW91-23HFX |      | B3PW91-24HFX |      | B3PW91-25HFX |      | Experiment                                 |      |
|             | nm                                                    | eV   | nm           | eV   | nm           | eV   | nm           | eV   | nm           | eV   | nm           | eV   | nm                                         | eV   |
| F(DPP)2B2   | 658                                                   | 1.88 | 651          | 1.90 | 645          | 1.92 | 639          | 1.94 | 633          | 1.96 | 628          | 1.97 | 615                                        | 2.02 |
| Cz-RH       | 544                                                   | 2.28 | 539          | 2.30 | 534          | 2.32 | 529          | 2.34 | 525          | 2.36 | 521          | 2.38 | 500                                        | 2.48 |
| Flu-RH      | 563                                                   | 2.20 | 558          | 2.22 | 553          | 2.24 | 548          | 2.26 | 544          | 2.28 | 539          | 2.30 | 500                                        | 2.48 |
| FRd2        | 584                                                   | 2.12 | 578          | 2.15 | 573          | 2.16 | 568          | 2.18 | 563          | 2.20 | 558          | 2.22 | 509                                        | 2.44 |
| ITDI        | 711                                                   | 1.74 | 704          | 1.76 | 698          | 1.78 | 691          | 1.79 | 685          | 1.81 | 679          | 1.83 | 647                                        | 1.92 |
| SiIDT-IC-IC | 628                                                   | 1.97 | 623          | 1.99 | 619          | 2.00 | 615          | 2.02 | 611          | 2.03 | 607          | 2.04 | 639                                        | 1.94 |
| IDIDT-C8    | 712                                                   | 1.74 | 703          | 1.76 | 695          | 1.78 | 687          | 1.80 | 680          | 1.82 | 672          | 1.85 | 655                                        | 1.89 |
| IDT-BOC6    | 720                                                   | 1.72 | 711          | 1.74 | 702          | 1.77 | 694          | 1.79 | 685          | 1.81 | 677          | 1.83 | 688                                        | 1.80 |
| ATT1        | 741                                                   | 1.67 | 734          | 1.69 | 727          | 1.71 | 721          | 1.72 | 715          | 1.73 | 709          | 1.75 | 690                                        | 1.80 |
| DC-IDT2T    | 745                                                   | 1.66 | 738          | 1.68 | 731          | 1.70 | 723          | 1.72 | 717          | 1.73 | 710          | 1.75 | 700                                        | 1.77 |
| BZIC        | 692                                                   | 1.79 | 688          | 1.80 | 683          | 1.82 | 679          | 1.83 | 674          | 1.84 | 670          | 1.85 | 710                                        | 1.75 |
| ITOIC       | 748                                                   | 1.66 | 741          | 1.67 | 734          | 1.69 | 727          | 1.71 | 720          | 1.72 | 713          | 1.74 | 722                                        | 1.72 |
| IDTOT2F     | 762                                                   | 1.63 | 755          | 1.64 | 748          | 1.66 | 741          | 1.67 | 734          | 1.69 | 728          | 1.70 | 723                                        | 1.72 |
| ITOIC-F     | 747                                                   | 1.66 | 740          | 1.68 | 733          | 1.69 | 727          | 1.71 | 720          | 1.72 | 714          | 1.74 | 732                                        | 1.69 |
| ITOIC-2F    | 759                                                   | 1.63 | 752          | 1.65 | 745          | 1.66 | 738          | 1.68 | 731          | 1.70 | 725          | 1.71 | 737                                        | 1.68 |
| IEICO       | 853                                                   | 1.45 | 845          | 1.47 | 837          | 1.48 | 829          | 1.50 | 821          | 1.51 | 813          | 1.53 | 785                                        | 1.58 |
| ATT2        | 833                                                   | 1.49 | 825          | 1.50 | 818          | 1.52 | 811          | 1.53 | 804          | 1.54 | 797          | 1.56 | 791                                        | 1.57 |
| IEICO-4F    | 870                                                   | 1.43 | 862          | 1.44 | 854          | 1.45 | 847          | 1.46 | 839          | 1.48 | 832          | 1.49 | 805                                        | 1.54 |
| m-ITIC      | 686                                                   | 1.81 | 680          | 1.82 | 674          | 1.84 | 669          | 1.85 | 664          | 1.87 | 658          | 1.88 | 660                                        | 1.88 |
| IT-DM       | 683                                                   | 1.82 | 677          | 1.83 | 671          | 1.85 | 666          | 1.86 | 660          | 1.88 | 655          | 1.89 | 665                                        | 1.86 |
| IT-M        | 683                                                   | 1.82 | 677          | 1.83 | 672          | 1.85 | 666          | 1.86 | 661          | 1.88 | 656          | 1.89 | 668                                        | 1.86 |
| ITCPTC      | 698                                                   | 1.78 | 692          | 1.79 | 686          | 1.81 | 681          | 1.82 | 676          | 1.83 | 671          | 1.85 | 678                                        | 1.83 |
| Cl-ITIC     | 696                                                   | 1.78 | 690          | 1.80 | 684          | 1.81 | 679          | 1.83 | 673          | 1.84 | 668          | 1.86 | 691                                        | 1.79 |
| Br-ITIC     | 697                                                   | 1.78 | 691          | 1.79 | 685          | 1.81 | 680          | 1.82 | 674          | 1.84 | 669          | 1.85 | 692                                        | 1.79 |
| NFBDT       | 712                                                   | 1.74 | 706          | 1.76 | 700          | 1.77 | 694          | 1.79 | 689          | 1.80 | 683          | 1.82 | 703                                        | 1.76 |
| ITIC2       | 736                                                   | 1.68 | 729          | 1.70 | 723          | 1.72 | 716          | 1.73 | 710          | 1.75 | 704          | 1.76 | 714                                        | 1.74 |
| ITVFFIC     | 755                                                   | 1.64 | 748          | 1.66 | 742          | 1.67 | 736          | 1.68 | 730          | 1.70 | 724          | 1.71 | 750                                        | 1.65 |
| INIC        | 716                                                   | 1.73 | 709          | 1.75 | 702          | 1.77 | 695          | 1.78 | 689          | 1.80 | 683          | 1.82 | 692                                        | 1.79 |
| INIC2       | 730                                                   | 1.70 | 723          | 1.72 | 716          | 1.73 | 709          | 1.75 | 702          | 1.77 | 696          | 1.78 | 704                                        | 1.76 |
| INIC1       | 726                                                   | 1.71 | 719          | 1.72 | 712          | 1.74 | 706          | 1.76 | 699          | 1.77 | 693          | 1.79 | 710                                        | 1.75 |
| INIC3       | 727                                                   | 1.71 | 720          | 1.72 | 713          | 1.74 | 707          | 1.75 | 701          | 1.77 | 695          | 1.78 | 710                                        | 1.75 |
| IPIC        | 734                                                   | 1.69 | 728          | 1.70 | 721          | 1.72 | 715          | 1.73 | 708          | 1.75 | 702          | 1.77 | 761                                        | 1.63 |
| IPIC-4F     | 744                                                   | 1.67 | 737          | 1.68 | 731          | 1.70 | 725          | 1.71 | 719          | 1.72 | 713          | 1.74 | 776                                        | 1.60 |
| IPIC-4Cl    | 751                                                   | 1.65 | 744          | 1.67 | 737          | 1.68 | 731          | 1.70 | 724          | 1.71 | 718          | 1.73 | 790                                        | 1.57 |

<sup>a</sup>XC and HFX in PCM-TD-DFT-XC-HFX/6-31G(d,p) denote the exchange-correlation functional and percentage of Hartree-Fock exact-exchange, respectively.

**Table S9** Experimental maximum absorption wavelengths ( $\lambda_{\max}$  in nm), experimental transition energies ( $E_{\max\text{-exp}}$  in eV), theoretical vertical absorption wavelengths ( $\lambda_{\text{ver-theo}}$  in nm), and theoretical vertical transition energies ( $E_{\text{ver-theo}}$  in eV) of all FREAs computed in chloroform with PCM-TD-DFT-XC-HFX/6-31G(d,p)<sup>a</sup>

| Molecule  | $\lambda_{\text{ver-theo}}$ and $E_{\text{ver-theo}}$ |      |               |      |               |      |               |      |               |      |               |      | $\lambda_{\max}$ and $E_{\max\text{-exp}}$ |      |
|-----------|-------------------------------------------------------|------|---------------|------|---------------|------|---------------|------|---------------|------|---------------|------|--------------------------------------------|------|
|           | mPW3PBE                                               |      | mPW3PBE-21HFX |      | mPW3PBE-22HFX |      | mPW3PBE-23HFX |      | mPW3PBE-24HFX |      | mPW3PBE-25HFX |      | Experiment                                 |      |
|           | nm                                                    | eV   | nm            | eV   | nm            | eV   | nm            | eV   | nm            | eV   | nm            | eV   | nm                                         | eV   |
| F(DPP)2B2 | 658                                                   | 1.88 | 651           | 1.90 | 645           | 1.92 | 639           | 1.94 | 633           | 1.96 | 628           | 1.97 | 615                                        | 2.02 |
| Cz-RH     | 544                                                   | 2.28 | 539           | 2.30 | 534           | 2.32 | 529           | 2.34 | 525           | 2.36 | 521           | 2.38 | 500                                        | 2.48 |
| Flu-RH    | 563                                                   | 2.20 | 558           | 2.22 | 553           | 2.24 | 548           | 2.26 | 544           | 2.28 | 539           | 2.30 | 500                                        | 2.48 |
| FRd2      | 584                                                   | 2.12 | 578           | 2.15 | 573           | 2.16 | 568           | 2.18 | 563           | 2.20 | 558           | 2.22 | 509                                        | 2.44 |
| ITDI      | 711                                                   | 1.74 | 704           | 1.76 | 698           | 1.78 | 691           | 1.79 | 685           | 1.81 | 679           | 1.83 | 647                                        | 1.92 |
| SiIDT-IC  | 628                                                   | 1.97 | 623           | 1.99 | 619           | 2.00 | 615           | 2.02 | 611           | 2.03 | 607           | 2.04 | 639                                        | 1.94 |
| IDIDT-C8  | 711                                                   | 1.74 | 703           | 1.76 | 695           | 1.78 | 687           | 1.80 | 679           | 1.83 | 672           | 1.85 | 655                                        | 1.89 |
| IDT-BOC6  | 720                                                   | 1.72 | 711           | 1.74 | 702           | 1.77 | 693           | 1.79 | 685           | 1.81 | 677           | 1.83 | 688                                        | 1.80 |
| ATT1      | 741                                                   | 1.67 | 734           | 1.69 | 728           | 1.70 | 721           | 1.72 | 715           | 1.73 | 709           | 1.75 | 690                                        | 1.80 |
| DC-IDT2T  | 745                                                   | 1.66 | 738           | 1.68 | 730           | 1.70 | 723           | 1.72 | 716           | 1.73 | 710           | 1.75 | 700                                        | 1.77 |
| BZIC      | 692                                                   | 1.79 | 687           | 1.80 | 683           | 1.82 | 678           | 1.83 | 674           | 1.84 | 670           | 1.85 | 710                                        | 1.75 |
| ITOIC     | 748                                                   | 1.66 | 741           | 1.67 | 733           | 1.69 | 726           | 1.71 | 720           | 1.72 | 713           | 1.74 | 722                                        | 1.72 |
| IDTOT2F   | 762                                                   | 1.63 | 755           | 1.64 | 747           | 1.66 | 741           | 1.67 | 734           | 1.69 | 727           | 1.71 | 723                                        | 1.72 |
| ITOIC-F   | 747                                                   | 1.66 | 740           | 1.68 | 733           | 1.69 | 726           | 1.71 | 720           | 1.72 | 714           | 1.74 | 732                                        | 1.69 |
| ITOIC-2F  | 759                                                   | 1.63 | 751           | 1.65 | 744           | 1.67 | 738           | 1.68 | 731           | 1.70 | 725           | 1.71 | 737                                        | 1.68 |
| IEICO     | 853                                                   | 1.45 | 845           | 1.47 | 836           | 1.48 | 828           | 1.50 | 821           | 1.51 | 813           | 1.53 | 785                                        | 1.58 |
| ATT2      | 833                                                   | 1.49 | 825           | 1.50 | 817           | 1.52 | 810           | 1.53 | 803           | 1.54 | 797           | 1.56 | 791                                        | 1.57 |
| IEICO-4F  | 870                                                   | 1.43 | 862           | 1.44 | 854           | 1.45 | 846           | 1.47 | 839           | 1.48 | 832           | 1.49 | 805                                        | 1.54 |
| m-ITIC    | 685                                                   | 1.81 | 680           | 1.82 | 674           | 1.84 | 668           | 1.86 | 663           | 1.87 | 658           | 1.88 | 660                                        | 1.88 |
| IT-DM     | 682                                                   | 1.82 | 676           | 1.83 | 671           | 1.85 | 665           | 1.86 | 660           | 1.88 | 655           | 1.89 | 665                                        | 1.86 |
| IT-M      | 683                                                   | 1.82 | 677           | 1.83 | 671           | 1.85 | 666           | 1.86 | 661           | 1.88 | 656           | 1.89 | 668                                        | 1.86 |
| ITCPTC    | 697                                                   | 1.78 | 692           | 1.79 | 686           | 1.81 | 681           | 1.82 | 675           | 1.84 | 670           | 1.85 | 678                                        | 1.83 |
| Cl-ITIC   | 696                                                   | 1.78 | 690           | 1.80 | 684           | 1.81 | 678           | 1.83 | 673           | 1.84 | 668           | 1.86 | 691                                        | 1.79 |
| Br-ITIC   | 697                                                   | 1.78 | 691           | 1.79 | 685           | 1.81 | 679           | 1.83 | 674           | 1.84 | 669           | 1.85 | 692                                        | 1.79 |
| NFBDT     | 712                                                   | 1.74 | 706           | 1.76 | 700           | 1.77 | 694           | 1.79 | 688           | 1.80 | 683           | 1.82 | 703                                        | 1.76 |
| ITIC2     | 736                                                   | 1.68 | 729           | 1.70 | 722           | 1.72 | 716           | 1.73 | 709           | 1.75 | 703           | 1.76 | 714                                        | 1.74 |
| ITVFFIC   | 754                                                   | 1.64 | 748           | 1.66 | 742           | 1.67 | 735           | 1.69 | 730           | 1.70 | 724           | 1.71 | 750                                        | 1.65 |
| INIC      | 715                                                   | 1.73 | 708           | 1.75 | 702           | 1.77 | 695           | 1.78 | 688           | 1.80 | 682           | 1.82 | 692                                        | 1.79 |
| INIC2     | 730                                                   | 1.70 | 722           | 1.72 | 715           | 1.73 | 708           | 1.75 | 702           | 1.77 | 695           | 1.78 | 704                                        | 1.76 |
| INIC1     | 726                                                   | 1.71 | 719           | 1.72 | 712           | 1.74 | 705           | 1.76 | 699           | 1.77 | 693           | 1.79 | 710                                        | 1.75 |
| INIC3     | 726                                                   | 1.71 | 719           | 1.72 | 713           | 1.74 | 706           | 1.76 | 700           | 1.77 | 694           | 1.79 | 710                                        | 1.75 |
| IPIC      | 734                                                   | 1.69 | 727           | 1.71 | 721           | 1.72 | 714           | 1.74 | 708           | 1.75 | 702           | 1.77 | 761                                        | 1.63 |
| IPIC-4F   | 743                                                   | 1.67 | 737           | 1.68 | 730           | 1.70 | 724           | 1.71 | 718           | 1.73 | 712           | 1.74 | 776                                        | 1.60 |
| IPIC-4Cl  | 751                                                   | 1.65 | 744           | 1.67 | 737           | 1.68 | 730           | 1.70 | 724           | 1.71 | 717           | 1.73 | 790                                        | 1.57 |

<sup>a</sup>XC and HFX in PCM-TD-DFT-XC-HFX/6-31G(d,p) denote the exchange-correlation functional and percentage of Hartree-Fock exact-exchange, respectively.

**Table S10** Experimental maximum absorption wavelengths ( $\lambda_{\text{max}}$  in nm), experimental transition energies ( $E_{\text{max-exp}}$  in eV), theoretical vertical absorption wavelengths ( $\lambda_{\text{ver-theo}}$  in nm), and theoretical vertical transition energies ( $E_{\text{ver-theo}}$  in eV) of all FREAs computed in chloroform with PCM-TD-DFT-XC-HFX/6-31G(d,p)<sup>a</sup>

| Molecule  | $\lambda_{\text{ver-theo}}$ and $E_{\text{ver-theo}}$ |      |       |      |             |      |             |      |             |      |             |      | $\lambda_{\text{max}}$ and $E_{\text{max-exp}}$ |      |
|-----------|-------------------------------------------------------|------|-------|------|-------------|------|-------------|------|-------------|------|-------------|------|-------------------------------------------------|------|
|           | X3LYP-20HFX                                           |      | X3LYP |      | X3LYP-22HFX |      | X3LYP-23HFX |      | X3LYP-24HFX |      | X3LYP-25HFX |      | Experiment                                      |      |
|           | nm                                                    | eV   | nm    | eV   | nm          | eV   | nm          | eV   | nm          | eV   | nm          | eV   | nm                                              | eV   |
| F(DPP)2B2 | 661                                                   | 1.88 | 649   | 1.91 | 648         | 1.91 | 642         | 1.93 | 636         | 1.95 | 631         | 1.97 | 615                                             | 2.02 |
| Cz-RH     | 547                                                   | 2.27 | 538   | 2.30 | 537         | 2.31 | 533         | 2.33 | 528         | 2.35 | 524         | 2.37 | 500                                             | 2.48 |
| Flu-RH    | 566                                                   | 2.19 | 557   | 2.23 | 556         | 2.23 | 551         | 2.25 | 547         | 2.27 | 542         | 2.29 | 500                                             | 2.48 |
| FRd2      | 587                                                   | 2.11 | 577   | 2.15 | 576         | 2.15 | 571         | 2.17 | 566         | 2.19 | 561         | 2.21 | 509                                             | 2.44 |
| ITDI      | 714                                                   | 1.74 | 702   | 1.77 | 701         | 1.77 | 694         | 1.79 | 688         | 1.80 | 682         | 1.82 | 647                                             | 1.92 |
| SiIDT-IC  | 631                                                   | 1.97 | 623   | 1.99 | 622         | 1.99 | 618         | 2.01 | 614         | 2.02 | 610         | 2.03 | 639                                             | 1.94 |
| IDIDT-C8  | 713                                                   | 1.74 | 698   | 1.78 | 697         | 1.78 | 689         | 1.80 | 681         | 1.82 | 674         | 1.84 | 655                                             | 1.89 |
| IDT-BOC6  | 723                                                   | 1.72 | 707   | 1.75 | 705         | 1.76 | 697         | 1.78 | 688         | 1.80 | 680         | 1.82 | 688                                             | 1.80 |
| ATT1      | 746                                                   | 1.66 | 734   | 1.69 | 732         | 1.69 | 726         | 1.71 | 720         | 1.72 | 713         | 1.74 | 690                                             | 1.80 |
| DC-IDT2T  | 749                                                   | 1.66 | 735   | 1.69 | 734         | 1.69 | 727         | 1.71 | 720         | 1.72 | 713         | 1.74 | 700                                             | 1.77 |
| BZIC      | 696                                                   | 1.78 | 688   | 1.80 | 687         | 1.80 | 682         | 1.82 | 678         | 1.83 | 674         | 1.84 | 710                                             | 1.75 |
| ITOIC     | 752                                                   | 1.65 | 739   | 1.68 | 737         | 1.68 | 730         | 1.70 | 724         | 1.71 | 717         | 1.73 | 722                                             | 1.72 |
| IDTOT2F   | 765                                                   | 1.62 | 752   | 1.65 | 751         | 1.65 | 744         | 1.67 | 737         | 1.68 | 731         | 1.70 | 723                                             | 1.72 |
| ITOIC-F   | 751                                                   | 1.65 | 738   | 1.68 | 737         | 1.68 | 730         | 1.70 | 724         | 1.71 | 717         | 1.73 | 732                                             | 1.69 |
| ITOIC-2F  | 762                                                   | 1.63 | 749   | 1.66 | 748         | 1.66 | 741         | 1.67 | 735         | 1.69 | 728         | 1.70 | 737                                             | 1.68 |
| IEICO     | 858                                                   | 1.45 | 843   | 1.47 | 841         | 1.47 | 833         | 1.49 | 826         | 1.50 | 818         | 1.52 | 785                                             | 1.58 |
| ATT2      | 838                                                   | 1.48 | 824   | 1.50 | 823         | 1.51 | 816         | 1.52 | 809         | 1.53 | 802         | 1.55 | 791                                             | 1.57 |
| IEICO-4F  | 874                                                   | 1.42 | 860   | 1.44 | 858         | 1.45 | 851         | 1.46 | 843         | 1.47 | 836         | 1.48 | 805                                             | 1.54 |
| m-ITIC    | 688                                                   | 1.80 | 678   | 1.83 | 677         | 1.83 | 671         | 1.85 | 666         | 1.86 | 661         | 1.88 | 660                                             | 1.88 |
| IT-DM     | 685                                                   | 1.81 | 675   | 1.84 | 674         | 1.84 | 668         | 1.86 | 663         | 1.87 | 658         | 1.88 | 665                                             | 1.86 |
| IT-M      | 685                                                   | 1.81 | 675   | 1.84 | 674         | 1.84 | 669         | 1.85 | 663         | 1.87 | 658         | 1.88 | 668                                             | 1.86 |
| ITCPTC    | 700                                                   | 1.77 | 690   | 1.80 | 689         | 1.80 | 684         | 1.81 | 679         | 1.83 | 673         | 1.84 | 678                                             | 1.83 |
| Cl-ITIC   | 698                                                   | 1.78 | 688   | 1.80 | 687         | 1.80 | 681         | 1.82 | 676         | 1.83 | 670         | 1.85 | 691                                             | 1.79 |
| Br-ITIC   | 699                                                   | 1.77 | 689   | 1.80 | 688         | 1.80 | 682         | 1.82 | 677         | 1.83 | 671         | 1.85 | 692                                             | 1.79 |
| NFBDT     | 714                                                   | 1.74 | 703   | 1.76 | 702         | 1.77 | 696         | 1.78 | 691         | 1.79 | 685         | 1.81 | 703                                             | 1.76 |
| ITIC2     | 739                                                   | 1.68 | 726   | 1.71 | 725         | 1.71 | 719         | 1.72 | 712         | 1.74 | 706         | 1.76 | 714                                             | 1.74 |
| ITVFFIC   | 757                                                   | 1.64 | 745   | 1.66 | 744         | 1.67 | 738         | 1.68 | 732         | 1.69 | 726         | 1.71 | 750                                             | 1.65 |
| INIC      | 719                                                   | 1.72 | 706   | 1.76 | 705         | 1.76 | 698         | 1.78 | 692         | 1.79 | 686         | 1.81 | 692                                             | 1.79 |
| INIC2     | 733                                                   | 1.69 | 720   | 1.72 | 719         | 1.72 | 712         | 1.74 | 705         | 1.76 | 699         | 1.77 | 704                                             | 1.76 |
| INIC1     | 729                                                   | 1.70 | 717   | 1.73 | 715         | 1.73 | 709         | 1.75 | 702         | 1.77 | 696         | 1.78 | 710                                             | 1.75 |
| INIC3     | 729                                                   | 1.70 | 717   | 1.73 | 716         | 1.73 | 710         | 1.75 | 703         | 1.76 | 697         | 1.78 | 710                                             | 1.75 |
| IPIC      | 737                                                   | 1.68 | 725   | 1.71 | 724         | 1.71 | 717         | 1.73 | 711         | 1.74 | 705         | 1.76 | 761                                             | 1.63 |
| IPIC-4F   | 746                                                   | 1.66 | 734   | 1.69 | 733         | 1.69 | 727         | 1.71 | 721         | 1.72 | 715         | 1.73 | 776                                             | 1.60 |
| IPIC-4Cl  | 754                                                   | 1.64 | 741   | 1.67 | 740         | 1.68 | 733         | 1.69 | 727         | 1.71 | 721         | 1.72 | 790                                             | 1.57 |

<sup>a</sup> XC and HFX in PCM-TD-DFT-XC-HFX/6-31G(d,p) denote the exchange-correlation functional and percentage of Hartree-Fock exact-exchange, respectively.

**Table S11** Experimental maximum absorption wavelengths ( $\lambda_{\text{max}}$  in nm), experimental transition energies ( $E_{\text{max-exp}}$  in eV), theoretical vertical absorption wavelengths ( $\lambda_{\text{ver-theo}}$  in nm), and theoretical vertical transition energies ( $E_{\text{ver-theo}}$  in eV) of all FREAs computed in chloroform with PCM-TD-DFT-XC-HFX/6-31G(d,p)<sup>a</sup>

| Molecule  | $\lambda_{\text{ver-theo}}$ and $E_{\text{ver-theo}}$ |      |      |      |            |      |            |      |            |      |            |      | $\lambda_{\text{max}}$ and $E_{\text{max-exp}}$ |      |
|-----------|-------------------------------------------------------|------|------|------|------------|------|------------|------|------------|------|------------|------|-------------------------------------------------|------|
|           | B971-20HFX                                            |      | B971 |      | B971-22HFX |      | B971-23HFX |      | B971-24HFX |      | B971-25HFX |      | Experiment                                      |      |
|           | nm                                                    | eV   | nm   | eV   | nm         | eV   | nm         | eV   | nm         | eV   | nm         | eV   | nm                                              | eV   |
| F(DPP)2B2 | 661                                                   | 1.88 | 654  | 1.90 | 647        | 1.92 | 641        | 1.93 | 635        | 1.95 | 630        | 1.97 | 615                                             | 2.02 |
| Cz-RH     | 545                                                   | 2.28 | 540  | 2.30 | 535        | 2.32 | 530        | 2.34 | 526        | 2.36 | 522        | 2.38 | 500                                             | 2.48 |
| Flu-RH    | 564                                                   | 2.20 | 559  | 2.22 | 554        | 2.24 | 549        | 2.26 | 545        | 2.28 | 541        | 2.29 | 500                                             | 2.48 |
| FRd2      | 585                                                   | 2.12 | 580  | 2.14 | 574        | 2.16 | 569        | 2.18 | 564        | 2.20 | 560        | 2.21 | 509                                             | 2.44 |
| ITDI      | 712                                                   | 1.74 | 706  | 1.76 | 699        | 1.77 | 693        | 1.79 | 686        | 1.81 | 680        | 1.82 | 647                                             | 1.92 |
| SIIDT-IC  | 629                                                   | 1.97 | 624  | 1.99 | 620        | 2.00 | 616        | 2.01 | 612        | 2.03 | 608        | 2.04 | 639                                             | 1.94 |
| IDIDT-C8  | 712                                                   | 1.74 | 703  | 1.76 | 695        | 1.78 | 687        | 1.80 | 680        | 1.82 | 672        | 1.85 | 655                                             | 1.89 |
| IDT-BOC6  | 721                                                   | 1.72 | 712  | 1.74 | 703        | 1.76 | 695        | 1.78 | 686        | 1.81 | 678        | 1.83 | 688                                             | 1.80 |
| ATT1      | 744                                                   | 1.67 | 737  | 1.68 | 730        | 1.70 | 724        | 1.71 | 717        | 1.73 | 711        | 1.74 | 690                                             | 1.80 |
| DC-IDT2T  | 747                                                   | 1.66 | 739  | 1.68 | 732        | 1.69 | 725        | 1.71 | 718        | 1.73 | 712        | 1.74 | 700                                             | 1.77 |
| BZIC      | 694                                                   | 1.79 | 689  | 1.80 | 684        | 1.81 | 680        | 1.82 | 676        | 1.83 | 671        | 1.85 | 710                                             | 1.75 |
| ITOIC     | 750                                                   | 1.65 | 742  | 1.67 | 735        | 1.69 | 728        | 1.70 | 721        | 1.72 | 715        | 1.73 | 722                                             | 1.72 |
| IDTOT2F   | 763                                                   | 1.63 | 755  | 1.64 | 748        | 1.66 | 741        | 1.67 | 735        | 1.69 | 728        | 1.70 | 723                                             | 1.72 |
| ITOIC-F   | 748                                                   | 1.66 | 741  | 1.67 | 734        | 1.69 | 728        | 1.70 | 721        | 1.72 | 715        | 1.73 | 732                                             | 1.69 |
| ITOIC-2F  | 759                                                   | 1.63 | 752  | 1.65 | 745        | 1.66 | 739        | 1.68 | 732        | 1.69 | 726        | 1.71 | 737                                             | 1.68 |
| IEICO     | 856                                                   | 1.45 | 847  | 1.46 | 839        | 1.48 | 831        | 1.49 | 823        | 1.51 | 816        | 1.52 | 785                                             | 1.58 |
| ATT2      | 835                                                   | 1.49 | 828  | 1.50 | 820        | 1.51 | 813        | 1.53 | 806        | 1.54 | 799        | 1.55 | 791                                             | 1.57 |
| IEICO-4F  | 871                                                   | 1.42 | 863  | 1.44 | 856        | 1.45 | 848        | 1.46 | 841        | 1.47 | 834        | 1.49 | 805                                             | 1.54 |
| m-ITIC    | 686                                                   | 1.81 | 681  | 1.82 | 675        | 1.84 | 670        | 1.85 | 664        | 1.87 | 659        | 1.88 | 660                                             | 1.88 |
| IT-DM     | 683                                                   | 1.82 | 678  | 1.83 | 672        | 1.85 | 667        | 1.86 | 661        | 1.88 | 656        | 1.89 | 665                                             | 1.86 |
| IT-M      | 684                                                   | 1.81 | 678  | 1.83 | 672        | 1.85 | 667        | 1.86 | 662        | 1.87 | 657        | 1.89 | 668                                             | 1.86 |
| ITCPTC    | 699                                                   | 1.77 | 693  | 1.79 | 688        | 1.80 | 682        | 1.82 | 677        | 1.83 | 672        | 1.85 | 678                                             | 1.83 |
| Cl-ITIC   | 696                                                   | 1.78 | 691  | 1.79 | 685        | 1.81 | 679        | 1.83 | 674        | 1.84 | 669        | 1.85 | 691                                             | 1.79 |
| Br-ITIC   | 698                                                   | 1.78 | 692  | 1.79 | 686        | 1.81 | 680        | 1.82 | 675        | 1.84 | 670        | 1.85 | 692                                             | 1.79 |
| NFBBDT    | 713                                                   | 1.74 | 707  | 1.75 | 701        | 1.77 | 695        | 1.78 | 689        | 1.80 | 684        | 1.81 | 703                                             | 1.76 |
| ITIC2     | 737                                                   | 1.68 | 730  | 1.70 | 723        | 1.72 | 717        | 1.73 | 710        | 1.75 | 704        | 1.76 | 714                                             | 1.74 |
| ITVFFIC   | 755                                                   | 1.64 | 748  | 1.66 | 742        | 1.67 | 736        | 1.68 | 730        | 1.70 | 724        | 1.71 | 750                                             | 1.65 |
| INIC      | 717                                                   | 1.73 | 710  | 1.75 | 703        | 1.76 | 696        | 1.78 | 690        | 1.80 | 684        | 1.81 | 692                                             | 1.79 |
| INIC2     | 731                                                   | 1.70 | 724  | 1.71 | 717        | 1.73 | 710        | 1.75 | 703        | 1.76 | 697        | 1.78 | 704                                             | 1.76 |
| INIC1     | 727                                                   | 1.71 | 720  | 1.72 | 713        | 1.74 | 707        | 1.75 | 700        | 1.77 | 694        | 1.79 | 710                                             | 1.75 |
| INIC3     | 727                                                   | 1.71 | 720  | 1.72 | 714        | 1.74 | 707        | 1.75 | 701        | 1.77 | 695        | 1.78 | 710                                             | 1.75 |
| IPIC      | 735                                                   | 1.69 | 728  | 1.70 | 722        | 1.72 | 715        | 1.73 | 709        | 1.75 | 703        | 1.76 | 761                                             | 1.63 |
| IPIC-4F   | 744                                                   | 1.67 | 737  | 1.68 | 731        | 1.70 | 725        | 1.71 | 719        | 1.72 | 713        | 1.74 | 776                                             | 1.60 |
| IPIC-4Cl  | 752                                                   | 1.65 | 745  | 1.66 | 738        | 1.68 | 731        | 1.70 | 725        | 1.71 | 719        | 1.72 | 790                                             | 1.57 |

<sup>a</sup> XC and HFX in PCM-TD-DFT-XC-HFX/6-31G(d,p) denote the exchange-correlation functional and percentage of Hartree-Fock exact-exchange, respectively.



**Table S12** Experimental maximum absorption wavelengths ( $\lambda_{\text{max}}$  in nm), experimental transition energies ( $E_{\text{max-exp}}$  in eV), theoretical vertical absorption wavelengths ( $\lambda_{\text{ver-theo}}$  in nm), and theoretical vertical transition energies ( $E_{\text{ver-theo}}$  in eV) of all FREAs computed in chloroform with PCM-TD-DFT-XC-HFX/6-31G(d,p)<sup>a</sup>

| Molecule  | $\lambda_{\text{ver-theo}}$ and $E_{\text{ver-theo}}$ |      |      |      |            |      |            |      |            |      |            |      | $\lambda_{\text{max}}$ and $E_{\text{max-exp}}$ |      |
|-----------|-------------------------------------------------------|------|------|------|------------|------|------------|------|------------|------|------------|------|-------------------------------------------------|------|
|           | B972-20HFX                                            |      | B972 |      | B972-22HFX |      | B972-23HFX |      | B972-24HFX |      | B972-25HFX |      | Experiment                                      |      |
|           | nm                                                    | eV   | nm   | eV   | nm         | eV   | nm         | eV   | nm         | eV   | nm         | eV   | nm                                              | eV   |
| F(DPP)2B2 | 657                                                   | 1.89 | 650  | 1.91 | 644        | 1.93 | 638        | 1.94 | 632        | 1.96 | 627        | 1.98 | 615                                             | 2.02 |
| Cz-RH     | 542                                                   | 2.29 | 537  | 2.31 | 532        | 2.33 | 528        | 2.35 | 523        | 2.37 | 519        | 2.39 | 500                                             | 2.48 |
| Flu-RH    | 561                                                   | 2.21 | 556  | 2.23 | 551        | 2.25 | 546        | 2.27 | 542        | 2.29 | 538        | 2.30 | 500                                             | 2.48 |
| FRd2      | 583                                                   | 2.13 | 577  | 2.15 | 572        | 2.17 | 567        | 2.19 | 562        | 2.21 | 557        | 2.23 | 509                                             | 2.44 |
| ITDI      | 709                                                   | 1.75 | 702  | 1.77 | 695        | 1.78 | 689        | 1.80 | 683        | 1.82 | 677        | 1.83 | 647                                             | 1.92 |
| SiIDT-IC  | 626                                                   | 1.98 | 621  | 2.00 | 617        | 2.01 | 613        | 2.02 | 609        | 2.04 | 605        | 2.05 | 639                                             | 1.94 |
| IDIDT-C8  | 708                                                   | 1.75 | 700  | 1.77 | 692        | 1.79 | 684        | 1.81 | 677        | 1.83 | 669        | 1.85 | 655                                             | 1.89 |
| IDT-BOC6  | 717                                                   | 1.73 | 708  | 1.75 | 700        | 1.77 | 691        | 1.79 | 683        | 1.82 | 675        | 1.84 | 688                                             | 1.80 |
| ATT1      | 739                                                   | 1.68 | 732  | 1.69 | 726        | 1.71 | 719        | 1.72 | 713        | 1.74 | 707        | 1.75 | 690                                             | 1.80 |
| DC-IDT2T  | 743                                                   | 1.67 | 736  | 1.68 | 728        | 1.70 | 721        | 1.72 | 715        | 1.73 | 708        | 1.75 | 700                                             | 1.77 |
| BZIC      | 691                                                   | 1.79 | 686  | 1.81 | 681        | 1.82 | 677        | 1.83 | 673        | 1.84 | 668        | 1.86 | 710                                             | 1.75 |
| ITOIC     | 746                                                   | 1.66 | 739  | 1.68 | 731        | 1.70 | 724        | 1.71 | 718        | 1.73 | 711        | 1.74 | 722                                             | 1.72 |
| IDTOT2F   | 759                                                   | 1.63 | 752  | 1.65 | 745        | 1.66 | 738        | 1.68 | 731        | 1.70 | 725        | 1.71 | 723                                             | 1.72 |
| ITOIC-F   | 745                                                   | 1.66 | 738  | 1.68 | 731        | 1.70 | 724        | 1.71 | 718        | 1.73 | 712        | 1.74 | 732                                             | 1.69 |
| ITOIC-2F  | 756                                                   | 1.64 | 749  | 1.66 | 742        | 1.67 | 735        | 1.69 | 729        | 1.70 | 723        | 1.72 | 737                                             | 1.68 |
| IEICO     | 851                                                   | 1.46 | 843  | 1.47 | 835        | 1.49 | 827        | 1.50 | 819        | 1.51 | 811        | 1.53 | 785                                             | 1.58 |
| ATT2      | 831                                                   | 1.49 | 824  | 1.50 | 816        | 1.52 | 809        | 1.53 | 802        | 1.55 | 795        | 1.56 | 791                                             | 1.57 |
| IEICO-4F  | 867                                                   | 1.43 | 860  | 1.44 | 852        | 1.46 | 844        | 1.47 | 837        | 1.48 | 830        | 1.49 | 805                                             | 1.54 |
| m-ITIC    | 684                                                   | 1.81 | 678  | 1.83 | 672        | 1.85 | 667        | 1.86 | 662        | 1.87 | 657        | 1.89 | 660                                             | 1.88 |
| IT-DM     | 681                                                   | 1.82 | 675  | 1.84 | 670        | 1.85 | 664        | 1.87 | 659        | 1.88 | 654        | 1.90 | 665                                             | 1.86 |
| IT-M      | 681                                                   | 1.82 | 675  | 1.84 | 670        | 1.85 | 664        | 1.87 | 659        | 1.88 | 654        | 1.90 | 668                                             | 1.86 |
| ITCPTC    | 696                                                   | 1.78 | 690  | 1.80 | 685        | 1.81 | 679        | 1.83 | 674        | 1.84 | 669        | 1.85 | 678                                             | 1.83 |
| Cl-ITIC   | 694                                                   | 1.79 | 688  | 1.80 | 682        | 1.82 | 676        | 1.83 | 671        | 1.85 | 666        | 1.86 | 691                                             | 1.79 |
| Br-ITIC   | 695                                                   | 1.78 | 689  | 1.80 | 683        | 1.82 | 678        | 1.83 | 672        | 1.85 | 667        | 1.86 | 692                                             | 1.79 |
| NFBDT     | 710                                                   | 1.75 | 704  | 1.76 | 698        | 1.78 | 692        | 1.79 | 686        | 1.81 | 681        | 1.82 | 703                                             | 1.76 |
| ITIC2     | 734                                                   | 1.69 | 727  | 1.71 | 720        | 1.72 | 714        | 1.74 | 707        | 1.75 | 701        | 1.77 | 714                                             | 1.74 |
| ITVFFIC   | 752                                                   | 1.65 | 746  | 1.66 | 739        | 1.68 | 733        | 1.69 | 727        | 1.71 | 722        | 1.72 | 750                                             | 1.65 |
| INIC      | 714                                                   | 1.74 | 707  | 1.75 | 700        | 1.77 | 693        | 1.79 | 687        | 1.80 | 681        | 1.82 | 692                                             | 1.79 |
| INIC2     | 728                                                   | 1.70 | 720  | 1.72 | 713        | 1.74 | 707        | 1.75 | 700        | 1.77 | 694        | 1.79 | 704                                             | 1.76 |
| INIC1     | 724                                                   | 1.71 | 717  | 1.73 | 710        | 1.75 | 704        | 1.76 | 697        | 1.78 | 691        | 1.79 | 710                                             | 1.75 |
| INIC3     | 724                                                   | 1.71 | 717  | 1.73 | 711        | 1.74 | 704        | 1.76 | 698        | 1.78 | 692        | 1.79 | 710                                             | 1.75 |
| IPIC      | 732                                                   | 1.69 | 725  | 1.71 | 719        | 1.72 | 713        | 1.74 | 706        | 1.76 | 701        | 1.77 | 761                                             | 1.63 |
| IPIC-4F   | 741                                                   | 1.67 | 735  | 1.69 | 728        | 1.70 | 722        | 1.72 | 716        | 1.73 | 711        | 1.74 | 776                                             | 1.60 |
| IPIC-4Cl  | 749                                                   | 1.66 | 742  | 1.67 | 735        | 1.69 | 728        | 1.70 | 722        | 1.72 | 716        | 1.73 | 790                                             | 1.57 |

<sup>a</sup> XC and HFX in PCM-TD-DFT-XC-HFX/6-31G(d,p) denote the exchange-correlation functional and percentage of Hartree-Fock exact-exchange, respectively.

**Table S13** Experimental maximum absorption wavelengths ( $\lambda_{\text{max}}$  in nm), experimental transition energies ( $E_{\text{max-exp}}$  in eV), theoretical vertical absorption wavelengths ( $\lambda_{\text{ver-theo}}$  in nm), and theoretical vertical transition energies ( $E_{\text{ver-theo}}$  in eV) of all FREAs computed in chloroform with PCM-TD-DFT-XC-HFX/6-31G(d,p)<sup>a</sup>

| Molecule  | $\lambda_{\text{ver-theo}}$ and $E_{\text{ver-theo}}$ |      |           |      |     |      |           |      |           |      |           |      | $\lambda_{\text{max}}$ and $E_{\text{max-exp}}$ |      |
|-----------|-------------------------------------------------------|------|-----------|------|-----|------|-----------|------|-----------|------|-----------|------|-------------------------------------------------|------|
|           | B98-20HFX                                             |      | B98-21HFX |      | B98 |      | B98-23HFX |      | B98-24HFX |      | B98-25HFX |      | Experiment                                      |      |
|           | nm                                                    | eV   | nm        | eV   | nm  | eV   | nm        | eV   | nm        | eV   | nm        | eV   | nm                                              | eV   |
| F(DPP)2B2 | 661                                                   | 1.88 | 654       | 1.90 | 648 | 1.91 | 642       | 1.93 | 636       | 1.95 | 631       | 1.97 | 615                                             | 2.02 |
| Cz-RH     | 546                                                   | 2.27 | 541       | 2.29 | 536 | 2.31 | 531       | 2.34 | 527       | 2.35 | 523       | 2.37 | 500                                             | 2.48 |
| Flu-RH    | 565                                                   | 2.19 | 560       | 2.21 | 555 | 2.23 | 550       | 2.25 | 546       | 2.27 | 541       | 2.29 | 500                                             | 2.48 |
| FRd2      | 586                                                   | 2.12 | 581       | 2.13 | 575 | 2.16 | 570       | 2.18 | 565       | 2.19 | 561       | 2.21 | 509                                             | 2.44 |
| ITDI      | 714                                                   | 1.74 | 707       | 1.75 | 700 | 1.77 | 694       | 1.79 | 687       | 1.80 | 681       | 1.82 | 647                                             | 1.92 |
| SiIDT-IC  | 629                                                   | 1.97 | 625       | 1.98 | 621 | 2.00 | 616       | 2.01 | 612       | 2.03 | 608       | 2.04 | 639                                             | 1.94 |
| IDIDT-C8  | 713                                                   | 1.74 | 705       | 1.76 | 697 | 1.78 | 689       | 1.80 | 681       | 1.82 | 674       | 1.84 | 655                                             | 1.89 |
| IDT-BOC6  | 722                                                   | 1.72 | 713       | 1.74 | 705 | 1.76 | 696       | 1.78 | 688       | 1.80 | 680       | 1.82 | 688                                             | 1.80 |
| ATT1      | 745                                                   | 1.66 | 738       | 1.68 | 732 | 1.69 | 725       | 1.71 | 719       | 1.72 | 713       | 1.74 | 690                                             | 1.80 |
| DC-IDT2T  | 748                                                   | 1.66 | 741       | 1.67 | 734 | 1.69 | 726       | 1.71 | 720       | 1.72 | 713       | 1.74 | 700                                             | 1.77 |
| BZIC      | 694                                                   | 1.79 | 690       | 1.80 | 685 | 1.81 | 681       | 1.82 | 676       | 1.83 | 672       | 1.85 | 710                                             | 1.75 |
| ITOIC     | 751                                                   | 1.65 | 744       | 1.67 | 737 | 1.68 | 730       | 1.70 | 723       | 1.72 | 716       | 1.73 | 722                                             | 1.72 |
| IDTOT2F   | 764                                                   | 1.62 | 757       | 1.64 | 750 | 1.65 | 743       | 1.67 | 736       | 1.68 | 730       | 1.70 | 723                                             | 1.72 |
| ITOIC-F   | 749                                                   | 1.66 | 742       | 1.67 | 736 | 1.68 | 729       | 1.70 | 723       | 1.72 | 716       | 1.73 | 732                                             | 1.69 |
| ITOIC-2F  | 761                                                   | 1.63 | 754       | 1.64 | 747 | 1.66 | 740       | 1.68 | 734       | 1.69 | 727       | 1.71 | 737                                             | 1.68 |
| IEICO     | 857                                                   | 1.45 | 849       | 1.46 | 841 | 1.47 | 833       | 1.49 | 825       | 1.50 | 818       | 1.52 | 785                                             | 1.58 |
| ATT2      | 837                                                   | 1.48 | 829       | 1.50 | 822 | 1.51 | 815       | 1.52 | 808       | 1.53 | 801       | 1.55 | 791                                             | 1.57 |
| IEICO-4F  | 873                                                   | 1.42 | 865       | 1.43 | 857 | 1.45 | 850       | 1.46 | 843       | 1.47 | 835       | 1.49 | 805                                             | 1.54 |
| m-ITIC    | 687                                                   | 1.80 | 682       | 1.82 | 676 | 1.83 | 671       | 1.85 | 666       | 1.86 | 660       | 1.88 | 660                                             | 1.88 |
| IT-DM     | 684                                                   | 1.81 | 679       | 1.83 | 673 | 1.84 | 668       | 1.86 | 662       | 1.87 | 657       | 1.89 | 665                                             | 1.86 |
| IT-M      | 685                                                   | 1.81 | 679       | 1.83 | 674 | 1.84 | 668       | 1.86 | 663       | 1.87 | 658       | 1.88 | 668                                             | 1.86 |
| ITCPTC    | 700                                                   | 1.77 | 694       | 1.79 | 689 | 1.80 | 683       | 1.82 | 678       | 1.83 | 673       | 1.84 | 678                                             | 1.83 |
| Cl-ITIC   | 698                                                   | 1.78 | 692       | 1.79 | 686 | 1.81 | 680       | 1.82 | 675       | 1.84 | 670       | 1.85 | 691                                             | 1.79 |
| Br-ITIC   | 699                                                   | 1.77 | 693       | 1.79 | 687 | 1.80 | 682       | 1.82 | 676       | 1.83 | 671       | 1.85 | 692                                             | 1.79 |
| NFBDT     | 714                                                   | 1.74 | 708       | 1.75 | 702 | 1.77 | 696       | 1.78 | 690       | 1.80 | 685       | 1.81 | 703                                             | 1.76 |
| ITIC2     | 738                                                   | 1.68 | 731       | 1.70 | 725 | 1.71 | 718       | 1.73 | 712       | 1.74 | 706       | 1.76 | 714                                             | 1.74 |
| ITVFFIC   | 756                                                   | 1.64 | 749       | 1.66 | 743 | 1.67 | 737       | 1.68 | 731       | 1.70 | 726       | 1.71 | 750                                             | 1.65 |
| INIC      | 718                                                   | 1.73 | 711       | 1.74 | 705 | 1.76 | 698       | 1.78 | 691       | 1.79 | 685       | 1.81 | 692                                             | 1.79 |
| INIC2     | 732                                                   | 1.69 | 725       | 1.71 | 718 | 1.73 | 711       | 1.74 | 705       | 1.76 | 698       | 1.78 | 704                                             | 1.76 |
| INIC1     | 728                                                   | 1.70 | 721       | 1.72 | 715 | 1.73 | 708       | 1.75 | 702       | 1.77 | 695       | 1.78 | 710                                             | 1.75 |
| INIC3     | 728                                                   | 1.70 | 721       | 1.72 | 715 | 1.73 | 709       | 1.75 | 702       | 1.77 | 696       | 1.78 | 710                                             | 1.75 |
| IPIC      | 736                                                   | 1.68 | 729       | 1.70 | 723 | 1.72 | 717       | 1.73 | 710       | 1.75 | 704       | 1.76 | 761                                             | 1.63 |
| IPIC-4F   | 745                                                   | 1.66 | 738       | 1.68 | 732 | 1.69 | 726       | 1.71 | 720       | 1.72 | 714       | 1.74 | 776                                             | 1.60 |
| IPIC-4Cl  | 753                                                   | 1.65 | 746       | 1.66 | 739 | 1.68 | 733       | 1.69 | 726       | 1.71 | 720       | 1.72 | 790                                             | 1.57 |

<sup>a</sup> XC and HFX in PCM-TD-DFT-XC-HFX/6-31G(d,p) denote the exchange-correlation functional and percentage of Hartree-Fock exact-exchange, respectively.

**Table S14** Experimental maximum absorption wavelengths ( $\lambda_{\text{max}}$  in nm), experimental transition energies ( $E_{\text{max-exp}}$  in eV), theoretical vertical absorption wavelengths ( $\lambda_{\text{ver-theo}}$  in nm), and theoretical vertical transition energies ( $E_{\text{ver-theo}}$  in eV) of all FREAs computed in chloroform with PCM-TD-DFT-XC-HFX/6-31G(d,p)<sup>a</sup>

| Molecule  | $\lambda_{\text{ver-theo}}$ and $E_{\text{ver-theo}}$ |      |           |      |           |      |     |      |           |      |           |      | $\lambda_{\text{max}}$ and $E_{\text{max-exp}}$ |      |
|-----------|-------------------------------------------------------|------|-----------|------|-----------|------|-----|------|-----------|------|-----------|------|-------------------------------------------------|------|
|           | APF-20HFX                                             |      | APF-21HFX |      | APF-22HFX |      | APF |      | APF-24HFX |      | APF-25HFX |      | Experiment                                      |      |
|           | nm                                                    | eV   | nm        | eV   | nm        | eV   | nm  | eV   | nm        | eV   | nm        | eV   | nm                                              | eV   |
| F(DPP)2B2 | 659                                                   | 1.88 | 652       | 1.90 | 645       | 1.92 | 640 | 1.94 | 634       | 1.96 | 628       | 1.97 | 615                                             | 2.02 |
| Cz-RH     | 543                                                   | 2.28 | 538       | 2.30 | 534       | 2.32 | 529 | 2.34 | 525       | 2.36 | 520       | 2.38 | 500                                             | 2.48 |
| Flu-RH    | 562                                                   | 2.21 | 557       | 2.23 | 552       | 2.25 | 548 | 2.26 | 543       | 2.28 | 539       | 2.30 | 500                                             | 2.48 |
| FRd2      | 582                                                   | 2.13 | 577       | 2.15 | 571       | 2.17 | 567 | 2.19 | 561       | 2.21 | 557       | 2.23 | 509                                             | 2.44 |
| ITDI      | 709                                                   | 1.75 | 703       | 1.76 | 696       | 1.78 | 690 | 1.80 | 683       | 1.82 | 677       | 1.83 | 647                                             | 1.92 |
| SiIDT-IC  | 626                                                   | 1.98 | 622       | 1.99 | 618       | 2.01 | 614 | 2.02 | 609       | 2.04 | 606       | 2.05 | 639                                             | 1.94 |
| IDIDT-C8  | 709                                                   | 1.75 | 700       | 1.77 | 692       | 1.79 | 685 | 1.81 | 677       | 1.83 | 670       | 1.85 | 655                                             | 1.89 |
| IDT-BOC6  | 718                                                   | 1.73 | 709       | 1.75 | 700       | 1.77 | 692 | 1.79 | 684       | 1.81 | 675       | 1.84 | 688                                             | 1.80 |
| ATT1      | 740                                                   | 1.68 | 733       | 1.69 | 727       | 1.71 | 721 | 1.72 | 714       | 1.74 | 708       | 1.75 | 690                                             | 1.80 |
| DC-IDT2T  | 744                                                   | 1.67 | 736       | 1.68 | 729       | 1.70 | 722 | 1.72 | 715       | 1.73 | 708       | 1.75 | 700                                             | 1.77 |
| BZIC      | 692                                                   | 1.79 | 687       | 1.80 | 683       | 1.82 | 678 | 1.83 | 674       | 1.84 | 669       | 1.85 | 710                                             | 1.75 |
| ITOIC     | 747                                                   | 1.66 | 740       | 1.68 | 732       | 1.69 | 726 | 1.71 | 718       | 1.73 | 712       | 1.74 | 722                                             | 1.72 |
| IDTOT2F   | 759                                                   | 1.63 | 752       | 1.65 | 745       | 1.66 | 738 | 1.68 | 731       | 1.70 | 725       | 1.71 | 723                                             | 1.72 |
| ITOIC-F   | 745                                                   | 1.66 | 738       | 1.68 | 731       | 1.70 | 725 | 1.71 | 718       | 1.73 | 712       | 1.74 | 732                                             | 1.69 |
| ITOIC-2F  | 756                                                   | 1.64 | 749       | 1.66 | 742       | 1.67 | 736 | 1.68 | 729       | 1.70 | 722       | 1.72 | 737                                             | 1.68 |
| IEICO     | 852                                                   | 1.46 | 844       | 1.47 | 836       | 1.48 | 828 | 1.50 | 820       | 1.51 | 812       | 1.53 | 785                                             | 1.58 |
| ATT2      | 830                                                   | 1.49 | 822       | 1.51 | 815       | 1.52 | 808 | 1.53 | 801       | 1.55 | 794       | 1.56 | 791                                             | 1.57 |
| IEICO-4F  | 867                                                   | 1.43 | 859       | 1.44 | 851       | 1.46 | 844 | 1.47 | 837       | 1.48 | 829       | 1.50 | 805                                             | 1.54 |
| m-ITIC    | 684                                                   | 1.81 | 678       | 1.83 | 673       | 1.84 | 667 | 1.86 | 662       | 1.87 | 657       | 1.89 | 660                                             | 1.88 |
| IT-DM     | 681                                                   | 1.82 | 675       | 1.84 | 669       | 1.85 | 664 | 1.87 | 659       | 1.88 | 654       | 1.90 | 665                                             | 1.86 |
| IT-M      | 681                                                   | 1.82 | 676       | 1.83 | 670       | 1.85 | 665 | 1.86 | 659       | 1.88 | 654       | 1.90 | 668                                             | 1.86 |
| ITCPTC    | 696                                                   | 1.78 | 690       | 1.80 | 685       | 1.81 | 680 | 1.82 | 674       | 1.84 | 669       | 1.85 | 678                                             | 1.83 |
| Cl-ITIC   | 694                                                   | 1.79 | 688       | 1.80 | 682       | 1.82 | 677 | 1.83 | 671       | 1.85 | 666       | 1.86 | 691                                             | 1.79 |
| Br-ITIC   | 696                                                   | 1.78 | 690       | 1.80 | 684       | 1.81 | 678 | 1.83 | 673       | 1.84 | 667       | 1.86 | 692                                             | 1.79 |
| NFBDT     | 711                                                   | 1.74 | 705       | 1.76 | 699       | 1.77 | 693 | 1.79 | 687       | 1.80 | 682       | 1.82 | 703                                             | 1.76 |
| ITIC2     | 735                                                   | 1.69 | 728       | 1.70 | 721       | 1.72 | 715 | 1.73 | 708       | 1.75 | 702       | 1.77 | 714                                             | 1.74 |
| ITVFFIC   | 751                                                   | 1.65 | 745       | 1.66 | 739       | 1.68 | 733 | 1.69 | 727       | 1.71 | 721       | 1.72 | 750                                             | 1.65 |
| INIC      | 714                                                   | 1.74 | 707       | 1.75 | 700       | 1.77 | 694 | 1.79 | 687       | 1.80 | 681       | 1.82 | 692                                             | 1.79 |
| INIC2     | 727                                                   | 1.71 | 720       | 1.72 | 713       | 1.74 | 707 | 1.75 | 700       | 1.77 | 693       | 1.79 | 704                                             | 1.76 |
| INIC1     | 724                                                   | 1.71 | 717       | 1.73 | 710       | 1.75 | 704 | 1.76 | 697       | 1.78 | 691       | 1.79 | 710                                             | 1.75 |
| INIC3     | 723                                                   | 1.72 | 716       | 1.73 | 710       | 1.75 | 704 | 1.76 | 697       | 1.78 | 691       | 1.79 | 710                                             | 1.75 |
| IPIC      | 733                                                   | 1.69 | 726       | 1.71 | 719       | 1.72 | 713 | 1.74 | 707       | 1.75 | 701       | 1.77 | 761                                             | 1.63 |
| IPIC-4F   | 741                                                   | 1.67 | 734       | 1.69 | 728       | 1.70 | 722 | 1.72 | 716       | 1.73 | 710       | 1.75 | 776                                             | 1.60 |
| IPIC-4Cl  | 750                                                   | 1.65 | 742       | 1.67 | 736       | 1.68 | 729 | 1.70 | 723       | 1.72 | 716       | 1.73 | 790                                             | 1.57 |

<sup>a</sup> XC and HFX in PCM-TD-DFT-XC-HFX/6-31G(d,p) denote the exchange-correlation functional and percentage of Hartree-Fock exact-exchange, respectively.

**Table S15** Experimental maximum absorption wavelengths ( $\lambda_{\text{max}}$  in nm), experimental transition energies ( $E_{\text{max-exp}}$  in eV), theoretical vertical absorption wavelengths ( $\lambda_{\text{ver-theo}}$  in nm), and theoretical vertical transition energies ( $E_{\text{ver-theo}}$  in eV) of all FREAs computed in chloroform with PCM-TD-DFT-XC-HFX/6-31G(d,p)<sup>a</sup>

| Molecule  | $\lambda_{\text{ver-theo}}$ and $E_{\text{ver-theo}}$ |      |            |      |            |      |      |      |            |      |            |      | $\lambda_{\text{max}}$ and $E_{\text{max-exp}}$ |      |
|-----------|-------------------------------------------------------|------|------------|------|------------|------|------|------|------------|------|------------|------|-------------------------------------------------|------|
|           | APFD-20HFX                                            |      | APFD-21HFX |      | APFD-22HFX |      | APFD |      | APFD-24HFX |      | APFD-25HFX |      | Experiment                                      |      |
|           | nm                                                    | eV   | nm         | eV   | nm         | eV   | nm   | eV   | nm         | eV   | nm         | eV   | nm                                              | eV   |
| F(DPP)2B2 | 659                                                   | 1.88 | 652        | 1.90 | 645        | 1.92 | 640  | 1.94 | 634        | 1.96 | 628        | 1.97 | 615                                             | 2.02 |
| Cz-RH     | 543                                                   | 2.28 | 538        | 2.30 | 534        | 2.32 | 529  | 2.34 | 525        | 2.36 | 520        | 2.38 | 500                                             | 2.48 |
| Flu-RH    | 562                                                   | 2.21 | 557        | 2.23 | 552        | 2.25 | 548  | 2.26 | 543        | 2.28 | 539        | 2.30 | 500                                             | 2.48 |
| FRd2      | 582                                                   | 2.13 | 577        | 2.15 | 571        | 2.17 | 567  | 2.19 | 561        | 2.21 | 557        | 2.23 | 509                                             | 2.44 |
| ITDI      | 709                                                   | 1.75 | 703        | 1.76 | 696        | 1.78 | 690  | 1.80 | 683        | 1.82 | 677        | 1.83 | 647                                             | 1.92 |
| SiIDT-IC  | 626                                                   | 1.98 | 622        | 1.99 | 618        | 2.01 | 614  | 2.02 | 609        | 2.04 | 606        | 2.05 | 639                                             | 1.94 |
| IDIDT-C8  | 709                                                   | 1.75 | 700        | 1.77 | 692        | 1.79 | 685  | 1.81 | 677        | 1.83 | 670        | 1.85 | 655                                             | 1.89 |
| IDT-BOC6  | 718                                                   | 1.73 | 709        | 1.75 | 700        | 1.77 | 692  | 1.79 | 684        | 1.81 | 675        | 1.84 | 688                                             | 1.80 |
| ATT1      | 740                                                   | 1.68 | 733        | 1.69 | 727        | 1.71 | 721  | 1.72 | 714        | 1.74 | 708        | 1.75 | 690                                             | 1.80 |
| DC-IDT2T  | 744                                                   | 1.67 | 736        | 1.68 | 729        | 1.70 | 722  | 1.72 | 715        | 1.73 | 708        | 1.75 | 700                                             | 1.77 |
| BZIC      | 692                                                   | 1.79 | 687        | 1.80 | 683        | 1.82 | 678  | 1.83 | 674        | 1.84 | 669        | 1.85 | 710                                             | 1.75 |
| ITOIC     | 747                                                   | 1.66 | 740        | 1.68 | 732        | 1.69 | 726  | 1.71 | 718        | 1.73 | 712        | 1.74 | 722                                             | 1.72 |
| IDTOT2F   | 759                                                   | 1.63 | 752        | 1.65 | 745        | 1.66 | 738  | 1.68 | 731        | 1.70 | 725        | 1.71 | 723                                             | 1.72 |
| ITOIC-F   | 745                                                   | 1.66 | 738        | 1.68 | 731        | 1.70 | 725  | 1.71 | 718        | 1.73 | 712        | 1.74 | 732                                             | 1.69 |
| ITOIC-2F  | 756                                                   | 1.64 | 749        | 1.66 | 742        | 1.67 | 736  | 1.68 | 729        | 1.70 | 722        | 1.72 | 737                                             | 1.68 |
| IEICO     | 852                                                   | 1.46 | 844        | 1.47 | 836        | 1.48 | 828  | 1.50 | 820        | 1.51 | 812        | 1.53 | 785                                             | 1.58 |
| ATT2      | 830                                                   | 1.49 | 822        | 1.51 | 815        | 1.52 | 808  | 1.53 | 801        | 1.55 | 794        | 1.56 | 791                                             | 1.57 |
| IEICO-4F  | 867                                                   | 1.43 | 859        | 1.44 | 851        | 1.46 | 844  | 1.47 | 837        | 1.48 | 829        | 1.50 | 805                                             | 1.54 |
| m-ITIC    | 684                                                   | 1.81 | 678        | 1.83 | 673        | 1.84 | 667  | 1.86 | 662        | 1.87 | 657        | 1.89 | 660                                             | 1.88 |
| IT-DM     | 681                                                   | 1.82 | 675        | 1.84 | 669        | 1.85 | 664  | 1.87 | 659        | 1.88 | 654        | 1.90 | 665                                             | 1.86 |
| IT-M      | 681                                                   | 1.82 | 676        | 1.83 | 670        | 1.85 | 665  | 1.86 | 659        | 1.88 | 654        | 1.90 | 668                                             | 1.86 |
| ITCPTC    | 696                                                   | 1.78 | 690        | 1.80 | 685        | 1.81 | 680  | 1.82 | 674        | 1.84 | 669        | 1.85 | 678                                             | 1.83 |
| Cl-ITIC   | 694                                                   | 1.79 | 688        | 1.80 | 682        | 1.82 | 677  | 1.83 | 671        | 1.85 | 666        | 1.86 | 691                                             | 1.79 |
| Br-ITIC   | 696                                                   | 1.78 | 690        | 1.80 | 684        | 1.81 | 678  | 1.83 | 673        | 1.84 | 667        | 1.86 | 692                                             | 1.79 |
| NFBBDT    | 711                                                   | 1.74 | 705        | 1.76 | 699        | 1.77 | 693  | 1.79 | 687        | 1.80 | 682        | 1.82 | 703                                             | 1.76 |
| ITIC2     | 735                                                   | 1.69 | 728        | 1.70 | 721        | 1.72 | 715  | 1.73 | 708        | 1.75 | 702        | 1.77 | 714                                             | 1.74 |
| ITVFFIC   | 751                                                   | 1.65 | 745        | 1.66 | 739        | 1.68 | 733  | 1.69 | 727        | 1.71 | 721        | 1.72 | 750                                             | 1.65 |
| INIC      | 714                                                   | 1.74 | 707        | 1.75 | 700        | 1.77 | 694  | 1.79 | 687        | 1.80 | 681        | 1.82 | 692                                             | 1.79 |
| INIC2     | 727                                                   | 1.71 | 720        | 1.72 | 713        | 1.74 | 707  | 1.75 | 700        | 1.77 | 693        | 1.79 | 704                                             | 1.76 |
| INIC1     | 724                                                   | 1.71 | 717        | 1.73 | 710        | 1.75 | 704  | 1.76 | 697        | 1.78 | 691        | 1.79 | 710                                             | 1.75 |
| INIC3     | 723                                                   | 1.72 | 716        | 1.73 | 710        | 1.75 | 704  | 1.76 | 697        | 1.78 | 691        | 1.79 | 710                                             | 1.75 |
| IPIC      | 733                                                   | 1.69 | 726        | 1.71 | 719        | 1.72 | 713  | 1.74 | 707        | 1.75 | 701        | 1.77 | 761                                             | 1.63 |
| IPIC-4F   | 741                                                   | 1.67 | 734        | 1.69 | 728        | 1.70 | 722  | 1.72 | 716        | 1.73 | 710        | 1.75 | 776                                             | 1.60 |
| IPIC-4Cl  | 750                                                   | 1.65 | 742        | 1.67 | 736        | 1.68 | 729  | 1.70 | 723        | 1.72 | 716        | 1.73 | 790                                             | 1.57 |

<sup>a</sup> XC and HFX in PCM-TD-DFT-XC-HFX/6-31G(d,p) denote the exchange-correlation functional and percentage of Hartree-Fock exact-exchange, respectively.

**Table S16** Experimental maximum absorption wavelengths ( $\lambda_{\text{max}}$  in nm), experimental transition energies ( $E_{\text{max-exp}}$  in eV), theoretical vertical absorption wavelengths ( $\lambda_{\text{ver-theo}}$  in nm), and theoretical vertical transition energies ( $E_{\text{ver-theo}}$  in eV) of all FREAs computed in chloroform with PCM-TD-DFT-XC-HFX/6-31G(d,p)<sup>a</sup>

| Molecule  | $\lambda_{\text{ver-theo}}$ and $E_{\text{ver-theo}}$ |      |            |      |            |      |            |      |            |      | $\lambda_{\text{max}}$ and $E_{\text{max-exp}}$ |      |            |      |
|-----------|-------------------------------------------------------|------|------------|------|------------|------|------------|------|------------|------|-------------------------------------------------|------|------------|------|
|           | PBE0-20HFX                                            |      | PBE0-21HFX |      | PBE0-22HFX |      | PBE0-23HFX |      | PBE0-24HFX |      | PBE0                                            |      | Experiment |      |
|           | nm                                                    | eV   | nm         | eV   | nm         | eV   | nm         | eV   | nm         | eV   | nm                                              | eV   | nm         | eV   |
| F(DPP)2B2 | 659                                                   | 1.88 | 652        | 1.90 | 646        | 1.92 | 640        | 1.94 | 634        | 1.96 | 628                                             | 2.02 | 615        | 2.02 |
| Cz-RH     | 543                                                   | 2.28 | 538        | 2.30 | 533        | 2.33 | 529        | 2.34 | 524        | 2.37 | 520                                             | 2.48 | 500        | 2.48 |
| Flu-RH    | 562                                                   | 2.21 | 557        | 2.23 | 552        | 2.25 | 548        | 2.26 | 543        | 2.28 | 538                                             | 2.48 | 500        | 2.48 |
| FRd2      | 581                                                   | 2.13 | 576        | 2.15 | 570        | 2.18 | 565        | 2.19 | 560        | 2.21 | 556                                             | 2.44 | 509        | 2.44 |
| ITDI      | 708                                                   | 1.75 | 701        | 1.77 | 695        | 1.78 | 688        | 1.80 | 682        | 1.82 | 676                                             | 1.92 | 647        | 1.92 |
| SiIDT-IC  | 626                                                   | 1.98 | 621        | 2.00 | 617        | 2.01 | 613        | 2.02 | 609        | 2.04 | 605                                             | 1.94 | 639        | 1.94 |
| IDIDT-C8  | 707                                                   | 1.75 | 699        | 1.77 | 691        | 1.79 | 683        | 1.82 | 675        | 1.84 | 668                                             | 1.89 | 655        | 1.89 |
| IDT-BOC6  | 716                                                   | 1.73 | 707        | 1.75 | 699        | 1.77 | 690        | 1.80 | 682        | 1.82 | 674                                             | 1.8  | 688        | 1.80 |
| ATT1      | 740                                                   | 1.68 | 733        | 1.69 | 726        | 1.71 | 720        | 1.72 | 714        | 1.74 | 708                                             | 1.8  | 690        | 1.80 |
| DC-IDT2T  | 743                                                   | 1.67 | 735        | 1.69 | 728        | 1.70 | 721        | 1.72 | 714        | 1.74 | 707                                             | 1.77 | 700        | 1.77 |
| BZIC      | 691                                                   | 1.79 | 687        | 1.80 | 682        | 1.82 | 678        | 1.83 | 673        | 1.84 | 669                                             | 1.75 | 710        | 1.75 |
| ITOIC     | 746                                                   | 1.66 | 739        | 1.68 | 731        | 1.70 | 724        | 1.71 | 718        | 1.73 | 711                                             | 1.72 | 722        | 1.72 |
| IDTOT2F   | 757                                                   | 1.64 | 750        | 1.65 | 743        | 1.67 | 736        | 1.68 | 729        | 1.70 | 723                                             | 1.72 | 723        | 1.72 |
| ITOIC-F   | 743                                                   | 1.67 | 736        | 1.68 | 729        | 1.70 | 723        | 1.72 | 717        | 1.73 | 710                                             | 1.69 | 732        | 1.69 |
| ITOIC-2F  | 754                                                   | 1.64 | 747        | 1.66 | 740        | 1.68 | 733        | 1.69 | 727        | 1.71 | 721                                             | 1.68 | 737        | 1.68 |
| IEICO     | 851                                                   | 1.46 | 843        | 1.47 | 835        | 1.49 | 827        | 1.50 | 819        | 1.51 | 811                                             | 1.58 | 785        | 1.58 |
| ATT2      | 828                                                   | 1.50 | 820        | 1.51 | 813        | 1.53 | 806        | 1.54 | 799        | 1.55 | 792                                             | 1.57 | 791        | 1.57 |
| IEICO-4F  | 865                                                   | 1.43 | 857        | 1.45 | 849        | 1.46 | 842        | 1.47 | 835        | 1.49 | 827                                             | 1.54 | 805        | 1.54 |
| m-ITIC    | 683                                                   | 1.82 | 677        | 1.83 | 671        | 1.85 | 666        | 1.86 | 661        | 1.88 | 656                                             | 1.88 | 660        | 1.88 |
| IT-DM     | 679                                                   | 1.83 | 674        | 1.84 | 668        | 1.86 | 663        | 1.87 | 658        | 1.88 | 652                                             | 1.86 | 665        | 1.86 |
| IT-M      | 680                                                   | 1.82 | 674        | 1.84 | 669        | 1.85 | 663        | 1.87 | 658        | 1.88 | 653                                             | 1.86 | 668        | 1.86 |
| ITCPTC    | 695                                                   | 1.78 | 689        | 1.80 | 684        | 1.81 | 678        | 1.83 | 673        | 1.84 | 668                                             | 1.83 | 678        | 1.83 |
| Cl-ITIC   | 693                                                   | 1.79 | 687        | 1.80 | 681        | 1.82 | 676        | 1.83 | 670        | 1.85 | 665                                             | 1.79 | 691        | 1.79 |
| Br-ITIC   | 694                                                   | 1.79 | 688        | 1.80 | 683        | 1.82 | 677        | 1.83 | 672        | 1.85 | 666                                             | 1.79 | 692        | 1.79 |
| NFBDT     | 710                                                   | 1.75 | 704        | 1.76 | 698        | 1.78 | 692        | 1.79 | 686        | 1.81 | 681                                             | 1.76 | 703        | 1.76 |
| ITIC2     | 734                                                   | 1.69 | 727        | 1.71 | 720        | 1.72 | 713        | 1.74 | 707        | 1.75 | 701                                             | 1.74 | 714        | 1.74 |
| ITVFFIC   | 749                                                   | 1.66 | 742        | 1.67 | 736        | 1.68 | 730        | 1.70 | 724        | 1.71 | 719                                             | 1.65 | 750        | 1.65 |
| INIC      | 712                                                   | 1.74 | 705        | 1.76 | 698        | 1.78 | 692        | 1.79 | 685        | 1.81 | 679                                             | 1.79 | 692        | 1.79 |
| INIC2     | 726                                                   | 1.71 | 718        | 1.73 | 711        | 1.74 | 705        | 1.76 | 698        | 1.78 | 692                                             | 1.76 | 704        | 1.76 |
| INIC1     | 722                                                   | 1.72 | 715        | 1.73 | 708        | 1.75 | 701        | 1.77 | 695        | 1.78 | 689                                             | 1.75 | 710        | 1.75 |
| INIC3     | 720                                                   | 1.72 | 714        | 1.74 | 707        | 1.75 | 701        | 1.77 | 695        | 1.78 | 689                                             | 1.75 | 710        | 1.75 |
| IPIC      | 732                                                   | 1.69 | 725        | 1.71 | 718        | 1.73 | 712        | 1.74 | 706        | 1.76 | 700                                             | 1.63 | 761        | 1.63 |
| IPIC-4F   | 739                                                   | 1.68 | 732        | 1.69 | 726        | 1.71 | 720        | 1.72 | 714        | 1.74 | 708                                             | 1.6  | 776        | 1.60 |
| IPIC-4Cl  | 748                                                   | 1.66 | 741        | 1.67 | 734        | 1.69 | 728        | 1.70 | 722        | 1.72 | 721                                             | 1.57 | 790        | 1.57 |

<sup>a</sup> XC and HFX in PCM-TD-DFT-XC-HFX/6-31G(d,p) denote the exchange-correlation functional and percentage of Hartree-Fock exact-exchange, respectively.

**Table S17** Experimental maximum absorption wavelengths ( $\lambda_{\text{max}}$  in nm), experimental transition energies ( $E_{\text{max-exp}}$  in eV), theoretical vertical absorption wavelengths ( $\lambda_{\text{ver-theo}}$  in nm), and theoretical vertical transition energies ( $E_{\text{ver-theo}}$  in eV) of all FREAs computed in chloroform with PCM-TD-DFT-XC-HFX/6-31G(d,p)<sup>a</sup>

| Molecule  | $\lambda_{\text{ver-theo}}$ and $E_{\text{ver-theo}}$ |      |                |      |                |      |                |      |                |      |          |      | $\lambda_{\text{max}}$ and $E_{\text{max-exp}}$ |      |
|-----------|-------------------------------------------------------|------|----------------|------|----------------|------|----------------|------|----------------|------|----------|------|-------------------------------------------------|------|
|           | mPW1PW91-20HFX                                        |      | mPW1PW91-21HFX |      | mPW1PW91-22HFX |      | mPW1PW91-23HFX |      | mPW1PW91-24HFX |      | mPW1PW91 |      | Experiment                                      |      |
|           | nm                                                    | eV   | nm             | eV   | nm             | eV   | nm             | eV   | nm             | eV   | nm       | eV   | nm                                              | eV   |
| F(DPP)2B2 | 660                                                   | 1.88 | 652            | 1.90 | 646            | 1.92 | 640            | 1.94 | 634            | 1.96 | 629      | 1.97 | 615                                             | 2.02 |
| Cz-RH     | 544                                                   | 2.28 | 539            | 2.30 | 534            | 2.32 | 529            | 2.34 | 525            | 2.36 | 520      | 2.38 | 500                                             | 2.48 |
| Flu-RH    | 562                                                   | 2.21 | 557            | 2.23 | 553            | 2.24 | 548            | 2.26 | 543            | 2.28 | 539      | 2.30 | 500                                             | 2.48 |
| FRd2      | 582                                                   | 2.13 | 576            | 2.15 | 571            | 2.17 | 566            | 2.19 | 561            | 2.21 | 556      | 2.23 | 509                                             | 2.44 |
| ITDI      | 709                                                   | 1.75 | 702            | 1.77 | 696            | 1.78 | 689            | 1.80 | 683            | 1.82 | 677      | 1.83 | 647                                             | 1.92 |
| SiIDT-IC  | 626                                                   | 1.98 | 622            | 1.99 | 618            | 2.01 | 613            | 2.02 | 609            | 2.04 | 605      | 2.05 | 639                                             | 1.94 |
| IDIDT-C8  | 708                                                   | 1.75 | 700            | 1.77 | 692            | 1.79 | 684            | 1.81 | 676            | 1.83 | 669      | 1.85 | 655                                             | 1.89 |
| IDT-BOC6  | 717                                                   | 1.73 | 709            | 1.75 | 700            | 1.77 | 691            | 1.79 | 683            | 1.82 | 675      | 1.84 | 688                                             | 1.80 |
| ATT1      | 741                                                   | 1.67 | 734            | 1.69 | 727            | 1.71 | 721            | 1.72 | 714            | 1.74 | 708      | 1.75 | 690                                             | 1.80 |
| DC-IDT2T  | 744                                                   | 1.67 | 736            | 1.68 | 729            | 1.70 | 722            | 1.72 | 715            | 1.73 | 708      | 1.75 | 700                                             | 1.77 |
| BZIC      | 692                                                   | 1.79 | 687            | 1.80 | 683            | 1.82 | 678            | 1.83 | 674            | 1.84 | 670      | 1.85 | 710                                             | 1.75 |
| ITOIC     | 747                                                   | 1.66 | 740            | 1.68 | 732            | 1.69 | 725            | 1.71 | 719            | 1.72 | 712      | 1.74 | 722                                             | 1.72 |
| IDTOT2F   | 758                                                   | 1.64 | 751            | 1.65 | 744            | 1.67 | 737            | 1.68 | 731            | 1.70 | 724      | 1.71 | 723                                             | 1.72 |
| ITOIC-F   | 744                                                   | 1.67 | 737            | 1.68 | 731            | 1.70 | 724            | 1.71 | 718            | 1.73 | 711      | 1.74 | 732                                             | 1.69 |
| ITOIC-2F  | 755                                                   | 1.64 | 748            | 1.66 | 741            | 1.67 | 735            | 1.69 | 728            | 1.70 | 722      | 1.72 | 737                                             | 1.68 |
| IEICO     | 853                                                   | 1.45 | 844            | 1.47 | 836            | 1.48 | 828            | 1.50 | 820            | 1.51 | 813      | 1.53 | 785                                             | 1.58 |
| ATT2      | 829                                                   | 1.50 | 822            | 1.51 | 814            | 1.52 | 807            | 1.54 | 800            | 1.55 | 794      | 1.56 | 791                                             | 1.57 |
| IEICO-4F  | 867                                                   | 1.43 | 859            | 1.44 | 851            | 1.46 | 843            | 1.47 | 836            | 1.48 | 829      | 1.50 | 805                                             | 1.54 |
| m-ITIC    | 684                                                   | 1.81 | 678            | 1.83 | 672            | 1.85 | 667            | 1.86 | 662            | 1.87 | 657      | 1.89 | 660                                             | 1.88 |
| IT-DM     | 681                                                   | 1.82 | 675            | 1.84 | 669            | 1.85 | 664            | 1.87 | 659            | 1.88 | 653      | 1.90 | 665                                             | 1.86 |
| IT-M      | 681                                                   | 1.82 | 675            | 1.84 | 670            | 1.85 | 664            | 1.87 | 659            | 1.88 | 654      | 1.90 | 668                                             | 1.86 |
| ITCPTC    | 696                                                   | 1.78 | 690            | 1.80 | 685            | 1.81 | 679            | 1.83 | 674            | 1.84 | 669      | 1.85 | 678                                             | 1.83 |
| Cl-ITIC   | 694                                                   | 1.79 | 688            | 1.80 | 682            | 1.82 | 677            | 1.83 | 671            | 1.85 | 666      | 1.86 | 691                                             | 1.79 |
| Br-ITIC   | 695                                                   | 1.78 | 689            | 1.80 | 684            | 1.81 | 678            | 1.83 | 673            | 1.84 | 667      | 1.86 | 692                                             | 1.79 |
| NFBBDT    | 711                                                   | 1.74 | 705            | 1.76 | 699            | 1.77 | 693            | 1.79 | 687            | 1.80 | 682      | 1.82 | 703                                             | 1.76 |
| ITIC2     | 735                                                   | 1.69 | 728            | 1.70 | 721            | 1.72 | 714            | 1.74 | 708            | 1.75 | 702      | 1.77 | 714                                             | 1.74 |
| ITVFFIC   | 750                                                   | 1.65 | 744            | 1.67 | 738            | 1.68 | 732            | 1.69 | 726            | 1.71 | 720      | 1.72 | 750                                             | 1.65 |
| INIC      | 713                                                   | 1.74 | 706            | 1.76 | 700            | 1.77 | 693            | 1.79 | 687            | 1.80 | 680      | 1.82 | 692                                             | 1.79 |
| INIC2     | 727                                                   | 1.71 | 720            | 1.72 | 713            | 1.74 | 706            | 1.76 | 699            | 1.77 | 693      | 1.79 | 704                                             | 1.76 |
| INIC1     | 723                                                   | 1.72 | 716            | 1.73 | 709            | 1.75 | 703            | 1.76 | 696            | 1.78 | 690      | 1.80 | 710                                             | 1.75 |
| INIC3     | 722                                                   | 1.72 | 715            | 1.73 | 709            | 1.75 | 703            | 1.76 | 696            | 1.78 | 691      | 1.79 | 710                                             | 1.75 |
| IPIC      | 733                                                   | 1.69 | 726            | 1.71 | 719            | 1.72 | 713            | 1.74 | 707            | 1.75 | 701      | 1.77 | 761                                             | 1.63 |
| IPIC-4F   | 740                                                   | 1.68 | 734            | 1.69 | 727            | 1.71 | 721            | 1.72 | 715            | 1.73 | 710      | 1.75 | 776                                             | 1.60 |
| IPIC-4Cl  | 749                                                   | 1.66 | 742            | 1.67 | 736            | 1.68 | 729            | 1.70 | 722            | 1.72 | 716      | 1.73 | 790                                             | 1.57 |

<sup>a</sup> XC and HFX in PCM-TD-DFT-XC-HFX/6-31G(d,p) denote the exchange-correlation functional and percentage of Hartree-Fock exact-exchange.

**Table S18** Experimental maximum absorption wavelengths ( $\lambda_{\text{max}}$  in nm), experimental transition energies ( $E_{\text{max-exp}}$  in eV), theoretical vertical absorption wavelengths ( $\lambda_{\text{ver-theo}}$  in nm), and theoretical vertical transition energies ( $E_{\text{ver-theo}}$  in eV) of all FREAs computed in chloroform with PCM-TD-DFT-XC-HFX/6-31G(d,p)<sup>a</sup>

| Molecule  | $\lambda_{\text{ver-theo}}$ and $E_{\text{ver-theo}}$ |      |               |      |               |      |               |      |               |      |         |      | $\lambda_{\text{max}}$ and $E_{\text{max-exp}}$ |      |
|-----------|-------------------------------------------------------|------|---------------|------|---------------|------|---------------|------|---------------|------|---------|------|-------------------------------------------------|------|
|           | mPW1LYP-20HFX                                         |      | mPW1LYP-21HFX |      | mPW1LYP-22HFX |      | mPW1LYP-23HFX |      | mPW1LYP-24HFX |      | mPW1LYP |      | Experiment                                      |      |
|           | nm                                                    | eV   | nm            | eV   | nm            | eV   | nm            | eV   | nm            | eV   | nm      | eV   | nm                                              | eV   |
| F(DPP)2B2 | 663                                                   | 1.87 | 655           | 1.89 | 649           | 1.91 | 643           | 1.93 | 637           | 1.95 | 632     | 1.96 | 615                                             | 2.02 |
| Cz-RH     | 547                                                   | 2.27 | 542           | 2.29 | 538           | 2.30 | 533           | 2.33 | 529           | 2.34 | 524     | 2.37 | 500                                             | 2.48 |
| Flu-RH    | 566                                                   | 2.19 | 561           | 2.21 | 556           | 2.23 | 552           | 2.25 | 547           | 2.27 | 543     | 2.28 | 500                                             | 2.48 |
| FRd2      | 586                                                   | 2.12 | 581           | 2.13 | 576           | 2.15 | 570           | 2.18 | 565           | 2.19 | 561     | 2.21 | 509                                             | 2.44 |
| ITDI      | 713                                                   | 1.74 | 706           | 1.76 | 700           | 1.77 | 693           | 1.79 | 687           | 1.80 | 681     | 1.82 | 647                                             | 1.92 |
| SiIDT-IC  | 630                                                   | 1.97 | 626           | 1.98 | 622           | 1.99 | 618           | 2.01 | 613           | 2.02 | 609     | 2.04 | 639                                             | 1.94 |
| IDIDT-C8  | 711                                                   | 1.74 | 703           | 1.76 | 695           | 1.78 | 687           | 1.80 | 680           | 1.82 | 672     | 1.85 | 655                                             | 1.89 |
| IDT-BOC6  | 722                                                   | 1.72 | 713           | 1.74 | 704           | 1.76 | 696           | 1.78 | 687           | 1.80 | 679     | 1.83 | 688                                             | 1.80 |
| ATT1      | 746                                                   | 1.66 | 739           | 1.68 | 733           | 1.69 | 726           | 1.71 | 720           | 1.72 | 714     | 1.74 | 690                                             | 1.80 |
| DC-IDT2T  | 748                                                   | 1.66 | 741           | 1.67 | 734           | 1.69 | 726           | 1.71 | 720           | 1.72 | 713     | 1.74 | 700                                             | 1.77 |
| BZIC      | 696                                                   | 1.78 | 692           | 1.79 | 687           | 1.80 | 683           | 1.82 | 678           | 1.83 | 674     | 1.84 | 710                                             | 1.75 |
| ITOIC     | 752                                                   | 1.65 | 744           | 1.67 | 737           | 1.68 | 730           | 1.70 | 723           | 1.72 | 717     | 1.73 | 722                                             | 1.72 |
| IDTOT2F   | 763                                                   | 1.63 | 756           | 1.64 | 749           | 1.66 | 742           | 1.67 | 735           | 1.69 | 729     | 1.70 | 723                                             | 1.72 |
| ITOIC-F   | 749                                                   | 1.66 | 742           | 1.67 | 736           | 1.68 | 729           | 1.70 | 723           | 1.72 | 716     | 1.73 | 732                                             | 1.69 |
| ITOIC-2F  | 760                                                   | 1.63 | 753           | 1.65 | 746           | 1.66 | 740           | 1.68 | 733           | 1.69 | 727     | 1.71 | 737                                             | 1.68 |
| IEICO     | 858                                                   | 1.45 | 850           | 1.46 | 842           | 1.47 | 834           | 1.49 | 826           | 1.50 | 818     | 1.52 | 785                                             | 1.58 |
| ATT2      | 837                                                   | 1.48 | 829           | 1.50 | 822           | 1.51 | 814           | 1.52 | 807           | 1.54 | 801     | 1.55 | 791                                             | 1.57 |
| IEICO-4F  | 872                                                   | 1.42 | 864           | 1.44 | 857           | 1.45 | 849           | 1.46 | 842           | 1.47 | 835     | 1.49 | 805                                             | 1.54 |
| m-ITIC    | 687                                                   | 1.80 | 681           | 1.82 | 676           | 1.83 | 671           | 1.85 | 665           | 1.86 | 660     | 1.88 | 660                                             | 1.88 |
| IT-DM     | 684                                                   | 1.81 | 678           | 1.83 | 673           | 1.84 | 667           | 1.86 | 662           | 1.87 | 657     | 1.89 | 665                                             | 1.86 |
| IT-M      | 684                                                   | 1.81 | 679           | 1.83 | 673           | 1.84 | 668           | 1.86 | 663           | 1.87 | 658     | 1.88 | 668                                             | 1.86 |
| ITCPTC    | 700                                                   | 1.77 | 694           | 1.79 | 689           | 1.80 | 683           | 1.82 | 678           | 1.83 | 673     | 1.84 | 678                                             | 1.83 |
| Cl-ITIC   | 697                                                   | 1.78 | 691           | 1.79 | 686           | 1.81 | 680           | 1.82 | 675           | 1.84 | 670     | 1.85 | 691                                             | 1.79 |
| Br-ITIC   | 699                                                   | 1.77 | 693           | 1.79 | 687           | 1.80 | 681           | 1.82 | 676           | 1.83 | 671     | 1.85 | 692                                             | 1.79 |
| NFBDT     | 713                                                   | 1.74 | 707           | 1.75 | 701           | 1.77 | 695           | 1.78 | 690           | 1.80 | 684     | 1.81 | 703                                             | 1.76 |
| ITIC2     | 738                                                   | 1.68 | 731           | 1.70 | 724           | 1.71 | 718           | 1.73 | 711           | 1.74 | 705     | 1.76 | 714                                             | 1.74 |
| ITVFFIC   | 754                                                   | 1.64 | 748           | 1.66 | 742           | 1.67 | 736           | 1.68 | 730           | 1.70 | 724     | 1.71 | 750                                             | 1.65 |
| INIC      | 718                                                   | 1.73 | 711           | 1.74 | 704           | 1.76 | 698           | 1.78 | 691           | 1.79 | 685     | 1.81 | 692                                             | 1.79 |
| INIC2     | 732                                                   | 1.69 | 724           | 1.71 | 717           | 1.73 | 711           | 1.74 | 704           | 1.76 | 698     | 1.78 | 704                                             | 1.76 |
| INIC1     | 728                                                   | 1.70 | 721           | 1.72 | 714           | 1.74 | 707           | 1.75 | 701           | 1.77 | 695     | 1.78 | 710                                             | 1.75 |
| INIC3     | 727                                                   | 1.71 | 720           | 1.72 | 714           | 1.74 | 707           | 1.75 | 701           | 1.77 | 695     | 1.78 | 710                                             | 1.75 |
| IPIC      | 736                                                   | 1.68 | 730           | 1.70 | 723           | 1.72 | 717           | 1.73 | 711           | 1.74 | 705     | 1.76 | 761                                             | 1.63 |
| IPIC-4F   | 744                                                   | 1.67 | 737           | 1.68 | 731           | 1.70 | 725           | 1.71 | 719           | 1.72 | 713     | 1.74 | 776                                             | 1.60 |
| IPIC-4Cl  | 753                                                   | 1.65 | 746           | 1.66 | 739           | 1.68 | 733           | 1.69 | 726           | 1.71 | 720     | 1.72 | 790                                             | 1.57 |

<sup>a</sup> XC and HFX in PCM-TD-DFT-XC-HFX/6-31G(d,p) denote the exchange-correlation functional and percentage of Hartree-Fock exact-exchange, respectively.

**Table S19** Experimental maximum absorption wavelengths ( $\lambda_{\text{max}}$  in nm), experimental transition energies ( $E_{\text{max-exp}}$  in eV), theoretical vertical absorption wavelengths ( $\lambda_{\text{ver-theo}}$  in nm), and theoretical vertical transition energies ( $E_{\text{ver-theo}}$  in eV) of all FREAs computed in chloroform with PCM-TD-DFT-XC-HFX/6-31G(d,p)<sup>a</sup>

| Molecule  | $\lambda_{\text{ver-theo}}$ and $E_{\text{ver-theo}}$ |      |               |      |               |      |               |      |               |      |         |      | $\lambda_{\text{max}}$ and $E_{\text{max-exp}}$ |      |
|-----------|-------------------------------------------------------|------|---------------|------|---------------|------|---------------|------|---------------|------|---------|------|-------------------------------------------------|------|
|           | mPW1PBE-20HFX                                         |      | mPW1PBE-21HFX |      | mPW1PBE-22HFX |      | mPW1PBE-23HFX |      | mPW1PBE-24HFX |      | mPW1PBE |      | Experiment                                      |      |
|           | nm                                                    | eV   | nm            | eV   | nm            | eV   | nm            | eV   | nm            | eV   | nm      | eV   | nm                                              | eV   |
| F(DPP)2B2 | 659                                                   | 1.88 | 652           | 1.90 | 646           | 1.92 | 640           | 1.94 | 634           | 1.96 | 629     | 1.97 | 615                                             | 2.02 |
| Cz-RH     | 543                                                   | 2.28 | 538           | 2.30 | 534           | 2.32 | 529           | 2.34 | 524           | 2.37 | 520     | 2.38 | 500                                             | 2.48 |
| Flu-RH    | 562                                                   | 2.21 | 557           | 2.23 | 552           | 2.25 | 548           | 2.26 | 543           | 2.28 | 539     | 2.30 | 500                                             | 2.48 |
| FRd2      | 582                                                   | 2.13 | 576           | 2.15 | 571           | 2.17 | 566           | 2.19 | 561           | 2.21 | 556     | 2.23 | 509                                             | 2.44 |
| ITDI      | 709                                                   | 1.75 | 702           | 1.77 | 695           | 1.78 | 689           | 1.80 | 682           | 1.82 | 677     | 1.83 | 647                                             | 1.92 |
| SiIDT-IC  | 626                                                   | 1.98 | 622           | 1.99 | 617           | 2.01 | 613           | 2.02 | 609           | 2.04 | 605     | 2.05 | 639                                             | 1.94 |
| IDIDT-C8  | 708                                                   | 1.75 | 699           | 1.77 | 691           | 1.79 | 684           | 1.81 | 676           | 1.83 | 669     | 1.85 | 655                                             | 1.89 |
| IDT-BOC6  | 717                                                   | 1.73 | 708           | 1.75 | 700           | 1.77 | 691           | 1.79 | 683           | 1.82 | 675     | 1.84 | 688                                             | 1.80 |
| ATT1      | 740                                                   | 1.68 | 733           | 1.69 | 727           | 1.71 | 720           | 1.72 | 714           | 1.74 | 708     | 1.75 | 690                                             | 1.80 |
| DC-IDT2T  | 743                                                   | 1.67 | 736           | 1.68 | 729           | 1.70 | 721           | 1.72 | 714           | 1.74 | 708     | 1.75 | 700                                             | 1.77 |
| BZIC      | 691                                                   | 1.79 | 687           | 1.80 | 682           | 1.82 | 678           | 1.83 | 673           | 1.84 | 669     | 1.85 | 710                                             | 1.75 |
| ITOIC     | 747                                                   | 1.66 | 739           | 1.68 | 732           | 1.69 | 725           | 1.71 | 718           | 1.73 | 712     | 1.74 | 722                                             | 1.72 |
| IDTOT2F   | 758                                                   | 1.64 | 751           | 1.65 | 744           | 1.67 | 737           | 1.68 | 730           | 1.70 | 724     | 1.71 | 723                                             | 1.72 |
| ITOIC-F   | 744                                                   | 1.67 | 737           | 1.68 | 730           | 1.70 | 724           | 1.71 | 717           | 1.73 | 711     | 1.74 | 732                                             | 1.69 |
| ITOIC-2F  | 755                                                   | 1.64 | 748           | 1.66 | 741           | 1.67 | 734           | 1.69 | 728           | 1.70 | 721     | 1.72 | 737                                             | 1.68 |
| IEICO     | 852                                                   | 1.46 | 844           | 1.47 | 835           | 1.49 | 827           | 1.50 | 820           | 1.51 | 812     | 1.53 | 785                                             | 1.58 |
| ATT2      | 829                                                   | 1.50 | 821           | 1.51 | 814           | 1.52 | 807           | 1.54 | 800           | 1.55 | 793     | 1.56 | 791                                             | 1.57 |
| IEICO-4F  | 866                                                   | 1.43 | 858           | 1.45 | 850           | 1.46 | 843           | 1.47 | 836           | 1.48 | 828     | 1.50 | 805                                             | 1.54 |
| m-ITIC    | 683                                                   | 1.82 | 678           | 1.83 | 672           | 1.85 | 667           | 1.86 | 661           | 1.88 | 656     | 1.89 | 660                                             | 1.88 |
| IT-DM     | 680                                                   | 1.82 | 674           | 1.84 | 669           | 1.85 | 663           | 1.87 | 658           | 1.88 | 653     | 1.90 | 665                                             | 1.86 |
| IT-M      | 681                                                   | 1.82 | 675           | 1.84 | 669           | 1.85 | 664           | 1.87 | 659           | 1.88 | 654     | 1.90 | 668                                             | 1.86 |
| ITCPTC    | 696                                                   | 1.78 | 690           | 1.80 | 684           | 1.81 | 679           | 1.83 | 674           | 1.84 | 669     | 1.85 | 678                                             | 1.83 |
| Cl-ITIC   | 693                                                   | 1.79 | 688           | 1.80 | 682           | 1.82 | 676           | 1.83 | 671           | 1.85 | 666     | 1.86 | 691                                             | 1.79 |
| Br-ITIC   | 695                                                   | 1.78 | 689           | 1.80 | 683           | 1.82 | 678           | 1.83 | 672           | 1.85 | 667     | 1.86 | 692                                             | 1.79 |
| NFBDT     | 711                                                   | 1.74 | 704           | 1.76 | 698           | 1.78 | 693           | 1.79 | 687           | 1.80 | 681     | 1.82 | 703                                             | 1.76 |
| ITIC2     | 734                                                   | 1.69 | 727           | 1.71 | 721           | 1.72 | 714           | 1.74 | 708           | 1.75 | 702     | 1.77 | 714                                             | 1.74 |
| ITVFFIC   | 750                                                   | 1.65 | 743           | 1.67 | 737           | 1.68 | 731           | 1.70 | 725           | 1.71 | 720     | 1.72 | 750                                             | 1.65 |
| INIC      | 713                                                   | 1.74 | 706           | 1.76 | 699           | 1.77 | 693           | 1.79 | 686           | 1.81 | 680     | 1.82 | 692                                             | 1.79 |
| INIC2     | 727                                                   | 1.71 | 719           | 1.72 | 712           | 1.74 | 706           | 1.76 | 699           | 1.77 | 693     | 1.79 | 704                                             | 1.76 |
| INIC1     | 722                                                   | 1.72 | 715           | 1.73 | 709           | 1.75 | 702           | 1.77 | 696           | 1.78 | 690     | 1.80 | 710                                             | 1.75 |
| INIC3     | 721                                                   | 1.72 | 715           | 1.73 | 708           | 1.75 | 702           | 1.77 | 696           | 1.78 | 690     | 1.80 | 710                                             | 1.75 |
| IPIC      | 732                                                   | 1.69 | 725           | 1.71 | 719           | 1.72 | 713           | 1.74 | 706           | 1.76 | 700     | 1.77 | 761                                             | 1.63 |
| IPIC-4F   | 740                                                   | 1.68 | 733           | 1.69 | 727           | 1.71 | 721           | 1.72 | 715           | 1.73 | 709     | 1.75 | 776                                             | 1.60 |
| IPIC-4Cl  | 749                                                   | 1.66 | 742           | 1.67 | 735           | 1.69 | 729           | 1.70 | 722           | 1.72 | 716     | 1.73 | 790                                             | 1.57 |

<sup>a</sup> XC and HFX in PCM-TD-DFT-XC-HFX/6-31G(d,p) denote the exchange-correlation functional and percentage of Hartree-Fock exact-exchange, respectively.



**Table S20** Experimental maximum absorption wavelengths ( $\lambda_{\text{max}}$  in nm), experimental transition energies ( $E_{\text{max-exp}}$  in eV), theoretical vertical absorption wavelengths ( $\lambda_{\text{ver-theo}}$  in nm), and theoretical vertical transition energies ( $E_{\text{ver-theo}}$  in eV) of all FREAs computed in chloroform with PCM-TD-DFT-XC-HFX/6-31G(d,p)<sup>a</sup>

| Molecule    | $\lambda_{\text{ver-theo}}$ and $E_{\text{ver-theo}}$ |      |           |      |           |      |           |      |           |      |           |      |           |      |     |      | $\lambda_{\text{max}}$ and $E_{\text{max-exp}}$ |      |
|-------------|-------------------------------------------------------|------|-----------|------|-----------|------|-----------|------|-----------|------|-----------|------|-----------|------|-----|------|-------------------------------------------------|------|
|             | M06-20HFX                                             |      | M06-21HFX |      | M06-22HFX |      | M06-23HFX |      | M06-24HFX |      | M06-25HFX |      | M06-26HFX |      | M06 |      | Experiment                                      |      |
|             | nm                                                    | eV   | nm        | eV   | nm        | eV   | nm        | eV   | nm        | eV   | nm        | eV   | nm        | eV   | nm  | eV   | nm                                              | eV   |
| F(DPP)2B2   | 666                                                   | 1.86 | 660       | 1.88 | 653       | 1.90 | 647       | 1.92 | 642       | 1.93 | 637       | 1.95 | 632       | 1.96 | 627 | 1.98 | 615                                             | 2.02 |
| Cz-RH       | 554                                                   | 2.24 | 549       | 2.26 | 544       | 2.28 | 540       | 2.30 | 535       | 2.32 | 531       | 2.34 | 527       | 2.35 | 523 | 2.37 | 500                                             | 2.48 |
| Flu-RH      | 574                                                   | 2.16 | 569       | 2.18 | 564       | 2.20 | 559       | 2.22 | 555       | 2.23 | 550       | 2.25 | 546       | 2.27 | 542 | 2.29 | 500                                             | 2.48 |
| FRd2        | 594                                                   | 2.09 | 589       | 2.11 | 583       | 2.13 | 578       | 2.15 | 573       | 2.16 | 569       | 2.18 | 564       | 2.20 | 560 | 2.21 | 509                                             | 2.44 |
| ITDI        | 714                                                   | 1.74 | 707       | 1.75 | 700       | 1.77 | 694       | 1.79 | 688       | 1.80 | 681       | 1.82 | 676       | 1.83 | 670 | 1.85 | 647                                             | 1.92 |
| SiIDT-IC-IC | 634                                                   | 1.96 | 630       | 1.97 | 625       | 1.98 | 621       | 2.00 | 617       | 2.01 | 613       | 2.02 | 609       | 2.04 | 605 | 2.05 | 639                                             | 1.94 |
| IDIDT-C8    | 712                                                   | 1.74 | 704       | 1.76 | 696       | 1.78 | 688       | 1.80 | 680       | 1.82 | 673       | 1.84 | 666       | 1.86 | 659 | 1.88 | 655                                             | 1.89 |
| IDT-BOC6    | 725                                                   | 1.71 | 716       | 1.73 | 707       | 1.75 | 699       | 1.77 | 691       | 1.79 | 683       | 1.82 | 675       | 1.84 | 668 | 1.86 | 688                                             | 1.80 |
| ATT1        | 752                                                   | 1.65 | 745       | 1.66 | 738       | 1.68 | 732       | 1.69 | 725       | 1.71 | 719       | 1.72 | 714       | 1.74 | 708 | 1.75 | 690                                             | 1.80 |
| DC-IDT2T    | 748                                                   | 1.66 | 741       | 1.67 | 733       | 1.69 | 726       | 1.71 | 719       | 1.72 | 713       | 1.74 | 706       | 1.76 | 700 | 1.77 | 700                                             | 1.77 |
| BZIC        | 700                                                   | 1.77 | 695       | 1.78 | 691       | 1.79 | 686       | 1.81 | 682       | 1.82 | 677       | 1.83 | 673       | 1.84 | 669 | 1.85 | 710                                             | 1.75 |
| ITOIC       | 752                                                   | 1.65 | 745       | 1.66 | 737       | 1.68 | 730       | 1.70 | 723       | 1.72 | 717       | 1.73 | 710       | 1.75 | 704 | 1.76 | 722                                             | 1.72 |
| IDTOT2F     | 763                                                   | 1.63 | 756       | 1.64 | 749       | 1.66 | 742       | 1.67 | 736       | 1.68 | 729       | 1.70 | 723       | 1.72 | 717 | 1.73 | 723                                             | 1.72 |
| ITOIC-F     | 749                                                   | 1.66 | 742       | 1.67 | 736       | 1.68 | 729       | 1.70 | 723       | 1.72 | 716       | 1.73 | 710       | 1.75 | 704 | 1.76 | 732                                             | 1.69 |
| ITOIC-2F    | 760                                                   | 1.63 | 753       | 1.65 | 746       | 1.66 | 739       | 1.68 | 733       | 1.69 | 726       | 1.71 | 720       | 1.72 | 714 | 1.74 | 737                                             | 1.68 |
| IEICO       | 862                                                   | 1.44 | 854       | 1.45 | 845       | 1.47 | 837       | 1.48 | 829       | 1.50 | 822       | 1.51 | 814       | 1.52 | 807 | 1.54 | 785                                             | 1.58 |
| ATT2        | 835                                                   | 1.49 | 827       | 1.50 | 820       | 1.51 | 813       | 1.53 | 806       | 1.54 | 799       | 1.55 | 792       | 1.57 | 786 | 1.58 | 791                                             | 1.57 |
| IEICO-4F    | 877                                                   | 1.41 | 869       | 1.43 | 861       | 1.44 | 853       | 1.45 | 846       | 1.47 | 839       | 1.48 | 832       | 1.49 | 825 | 1.50 | 805                                             | 1.54 |
| m-ITIC      | 691                                                   | 1.79 | 685       | 1.81 | 679       | 1.83 | 674       | 1.84 | 668       | 1.86 | 663       | 1.87 | 658       | 1.88 | 653 | 1.90 | 660                                             | 1.88 |
| IT-DM       | 688                                                   | 1.80 | 682       | 1.82 | 676       | 1.83 | 670       | 1.85 | 665       | 1.86 | 660       | 1.88 | 655       | 1.89 | 650 | 1.91 | 665                                             | 1.86 |
| IT-M        | 688                                                   | 1.80 | 682       | 1.82 | 676       | 1.83 | 671       | 1.85 | 666       | 1.86 | 661       | 1.88 | 656       | 1.89 | 651 | 1.90 | 668                                             | 1.86 |
| ITCPTC      | 703                                                   | 1.76 | 697       | 1.78 | 691       | 1.79 | 686       | 1.81 | 681       | 1.82 | 676       | 1.83 | 670       | 1.85 | 666 | 1.86 | 678                                             | 1.83 |
| Cl-ITIC     | 702                                                   | 1.77 | 696       | 1.78 | 690       | 1.80 | 684       | 1.81 | 679       | 1.83 | 673       | 1.84 | 668       | 1.86 | 663 | 1.87 | 691                                             | 1.79 |
| Br-ITIC     | 704                                                   | 1.76 | 697       | 1.78 | 692       | 1.79 | 686       | 1.81 | 680       | 1.82 | 675       | 1.84 | 670       | 1.85 | 665 | 1.86 | 692                                             | 1.79 |
| NFBdT       | 720                                                   | 1.72 | 714       | 1.74 | 707       | 1.75 | 702       | 1.77 | 696       | 1.78 | 690       | 1.80 | 685       | 1.81 | 680 | 1.82 | 703                                             | 1.76 |
| ITIC2       | 745                                                   | 1.66 | 738       | 1.68 | 731       | 1.70 | 725       | 1.71 | 718       | 1.73 | 712       | 1.74 | 706       | 1.76 | 700 | 1.77 | 714                                             | 1.74 |
| ITVFFIC     | 757                                                   | 1.64 | 750       | 1.65 | 744       | 1.67 | 738       | 1.68 | 732       | 1.69 | 726       | 1.71 | 721       | 1.72 | 715 | 1.73 | 750                                             | 1.65 |
| INIC        | 719                                                   | 1.72 | 712       | 1.74 | 705       | 1.76 | 698       | 1.78 | 692       | 1.79 | 685       | 1.81 | 679       | 1.83 | 674 | 1.84 | 692                                             | 1.79 |
| INIC2       | 733                                                   | 1.69 | 725       | 1.71 | 718       | 1.73 | 711       | 1.74 | 705       | 1.76 | 698       | 1.78 | 692       | 1.79 | 686 | 1.81 | 704                                             | 1.76 |
| INIC1       | 728                                                   | 1.70 | 721       | 1.72 | 714       | 1.74 | 708       | 1.75 | 701       | 1.77 | 695       | 1.78 | 689       | 1.80 | 683 | 1.82 | 710                                             | 1.75 |
| INIC3       | 727                                                   | 1.71 | 720       | 1.72 | 714       | 1.74 | 708       | 1.75 | 701       | 1.77 | 695       | 1.78 | 690       | 1.80 | 684 | 1.81 | 710                                             | 1.75 |
| IPIC        | 739                                                   | 1.68 | 732       | 1.69 | 725       | 1.71 | 719       | 1.72 | 713       | 1.74 | 707       | 1.75 | 701       | 1.77 | 696 | 1.78 | 761                                             | 1.63 |
| IPIC-4F     | 746                                                   | 1.66 | 740       | 1.68 | 734       | 1.69 | 727       | 1.71 | 721       | 1.72 | 715       | 1.73 | 710       | 1.75 | 705 | 1.76 | 776                                             | 1.60 |
| IPIC-4Cl    | 756                                                   | 1.64 | 749       | 1.66 | 742       | 1.67 | 736       | 1.68 | 729       | 1.70 | 723       | 1.72 | 717       | 1.73 | 711 | 1.74 | 790                                             | 1.57 |

<sup>a</sup> XC and HFX in PCM-TD-DFT-XC-HFX/6-31G(d,p) denote the exchange-correlation functional and percentage of Hartree-Fock exact-exchange, respectively.

**Table S21** Experimental maximum absorption wavelengths ( $\lambda_{\text{max}}$  in nm), experimental transition energies ( $E_{\text{max-exp}}$  in eV), theoretical vertical absorption wavelengths ( $\lambda_{\text{ver-theo}}$  in nm), and theoretical vertical transition energies ( $E_{\text{ver-theo}}$  in eV) of all FREAs computed in chloroform with PCM-TD-DFT-XC-HFX/6-31G(d,p)<sup>a</sup>

| Molecule    | $\lambda_{\text{ver-theo}}$ and $E_{\text{ver-theo}}$ |      |           |      |           |      |           |      |           |      |           |      |           |      |     |      | $\lambda_{\text{max}}$ and $E_{\text{max-exp}}$ |      |
|-------------|-------------------------------------------------------|------|-----------|------|-----------|------|-----------|------|-----------|------|-----------|------|-----------|------|-----|------|-------------------------------------------------|------|
|             | M05-20HFX                                             |      | M05-21HFX |      | M05-22HFX |      | M05-23HFX |      | M05-24HFX |      | M05-25HFX |      | M05-26HFX |      | M05 |      | Experiment                                      |      |
|             | nm                                                    | eV   | nm        | eV   | nm        | eV   | nm        | eV   | nm        | eV   | nm        | eV   | nm        | eV   | nm  | eV   | nm                                              | eV   |
| F(DPP)2B2   | 660                                                   | 1.88 | 653       | 1.90 | 647       | 1.92 | 641       | 1.93 | 636       | 1.95 | 631       | 1.97 | 626       | 1.98 | 617 | 2.01 | 615                                             | 2.02 |
| Cz-RH       | 550                                                   | 2.25 | 545       | 2.28 | 540       | 2.30 | 535       | 2.32 | 531       | 2.34 | 527       | 2.35 | 522       | 2.38 | 515 | 2.41 | 500                                             | 2.48 |
| Flu-RH      | 569                                                   | 2.18 | 564       | 2.20 | 559       | 2.22 | 555       | 2.23 | 550       | 2.25 | 546       | 2.27 | 542       | 2.29 | 534 | 2.32 | 500                                             | 2.48 |
| FRd2        | 591                                                   | 2.10 | 586       | 2.12 | 580       | 2.14 | 575       | 2.16 | 571       | 2.17 | 566       | 2.19 | 561       | 2.21 | 553 | 2.24 | 509                                             | 2.44 |
| ITDI        | 705                                                   | 1.76 | 698       | 1.78 | 691       | 1.79 | 684       | 1.81 | 678       | 1.83 | 672       | 1.85 | 666       | 1.86 | 655 | 1.89 | 647                                             | 1.92 |
| SiIDT-IC-IC | 624                                                   | 1.99 | 620       | 2.00 | 615       | 2.02 | 611       | 2.03 | 607       | 2.04 | 603       | 2.06 | 599       | 2.07 | 591 | 2.10 | 639                                             | 1.94 |
| IDIDT-C8    | 704                                                   | 1.76 | 696       | 1.78 | 688       | 1.80 | 680       | 1.82 | 672       | 1.85 | 665       | 1.86 | 658       | 1.88 | 644 | 1.93 | 655                                             | 1.89 |
| IDT-BOC6    | 715                                                   | 1.73 | 706       | 1.76 | 698       | 1.78 | 689       | 1.80 | 681       | 1.82 | 673       | 1.84 | 665       | 1.86 | 650 | 1.91 | 688                                             | 1.80 |
| ATT1        | 743                                                   | 1.67 | 737       | 1.68 | 730       | 1.70 | 723       | 1.72 | 717       | 1.73 | 711       | 1.74 | 705       | 1.76 | 694 | 1.79 | 690                                             | 1.80 |
| DC-IDT2T    | 738                                                   | 1.68 | 730       | 1.70 | 722       | 1.72 | 715       | 1.73 | 708       | 1.75 | 701       | 1.77 | 695       | 1.78 | 682 | 1.82 | 700                                             | 1.77 |
| BZIC        | 689                                                   | 1.80 | 684       | 1.81 | 679       | 1.83 | 674       | 1.84 | 670       | 1.85 | 665       | 1.86 | 661       | 1.88 | 652 | 1.90 | 710                                             | 1.75 |
| ITOIC       | 742                                                   | 1.67 | 734       | 1.69 | 727       | 1.71 | 719       | 1.72 | 712       | 1.74 | 706       | 1.76 | 699       | 1.77 | 687 | 1.80 | 722                                             | 1.72 |
| IDTOT2F     | 751                                                   | 1.65 | 744       | 1.67 | 737       | 1.68 | 730       | 1.70 | 723       | 1.72 | 717       | 1.73 | 710       | 1.75 | 698 | 1.78 | 723                                             | 1.72 |
| ITOIC-F     | 738                                                   | 1.68 | 731       | 1.70 | 724       | 1.71 | 717       | 1.73 | 711       | 1.74 | 704       | 1.76 | 698       | 1.78 | 687 | 1.80 | 732                                             | 1.69 |
| ITOIC-2F    | 749                                                   | 1.66 | 741       | 1.67 | 734       | 1.69 | 728       | 1.70 | 721       | 1.72 | 715       | 1.73 | 708       | 1.75 | 696 | 1.78 | 737                                             | 1.68 |
| IEICO       | 850                                                   | 1.46 | 842       | 1.47 | 833       | 1.49 | 825       | 1.50 | 817       | 1.52 | 809       | 1.53 | 801       | 1.55 | 787 | 1.58 | 785                                             | 1.58 |
| ATT2        | 821                                                   | 1.51 | 813       | 1.53 | 806       | 1.54 | 798       | 1.55 | 791       | 1.57 | 785       | 1.58 | 778       | 1.59 | 766 | 1.62 | 791                                             | 1.57 |
| IEICO-4F    | 863                                                   | 1.44 | 855       | 1.45 | 847       | 1.46 | 839       | 1.48 | 832       | 1.49 | 825       | 1.50 | 818       | 1.52 | 804 | 1.54 | 805                                             | 1.54 |
| m-ITIC      | 679                                                   | 1.83 | 673       | 1.84 | 668       | 1.86 | 662       | 1.87 | 657       | 1.89 | 651       | 1.90 | 646       | 1.92 | 637 | 1.95 | 660                                             | 1.88 |
| IT-DM       | 676                                                   | 1.83 | 670       | 1.85 | 664       | 1.87 | 659       | 1.88 | 653       | 1.90 | 648       | 1.91 | 643       | 1.93 | 633 | 1.96 | 665                                             | 1.86 |
| IT-M        | 677                                                   | 1.83 | 671       | 1.85 | 665       | 1.86 | 659       | 1.88 | 654       | 1.90 | 649       | 1.91 | 644       | 1.93 | 634 | 1.96 | 668                                             | 1.86 |
| ITCPTC      | 691                                                   | 1.79 | 685       | 1.81 | 679       | 1.83 | 674       | 1.84 | 668       | 1.86 | 663       | 1.87 | 658       | 1.88 | 648 | 1.91 | 678                                             | 1.83 |
| Cl-ITIC     | 691                                                   | 1.79 | 685       | 1.81 | 679       | 1.83 | 674       | 1.84 | 668       | 1.86 | 662       | 1.87 | 657       | 1.89 | 647 | 1.92 | 691                                             | 1.79 |
| Br-ITIC     | 693                                                   | 1.79 | 687       | 1.80 | 681       | 1.82 | 675       | 1.84 | 670       | 1.85 | 664       | 1.87 | 659       | 1.88 | 648 | 1.91 | 692                                             | 1.79 |
| NFBBDT      | 712                                                   | 1.74 | 705       | 1.76 | 699       | 1.77 | 693       | 1.79 | 687       | 1.80 | 681       | 1.82 | 675       | 1.84 | 665 | 1.86 | 703                                             | 1.76 |
| ITIC2       | 736                                                   | 1.68 | 728       | 1.70 | 721       | 1.72 | 714       | 1.74 | 708       | 1.75 | 701       | 1.77 | 695       | 1.78 | 683 | 1.82 | 714                                             | 1.74 |
| ITVFFIC     | 742                                                   | 1.67 | 735       | 1.69 | 729       | 1.70 | 723       | 1.72 | 717       | 1.73 | 711       | 1.74 | 705       | 1.76 | 694 | 1.79 | 750                                             | 1.65 |
| INIC        | 707                                                   | 1.75 | 699       | 1.77 | 692       | 1.79 | 685       | 1.81 | 678       | 1.83 | 673       | 1.84 | 666       | 1.86 | 655 | 1.89 | 692                                             | 1.79 |
| INIC2       | 720                                                   | 1.72 | 713       | 1.74 | 706       | 1.76 | 699       | 1.77 | 692       | 1.79 | 685       | 1.81 | 679       | 1.83 | 667 | 1.86 | 704                                             | 1.76 |
| INIC1       | 716                                                   | 1.73 | 709       | 1.75 | 702       | 1.77 | 695       | 1.78 | 688       | 1.80 | 682       | 1.82 | 676       | 1.83 | 664 | 1.87 | 710                                             | 1.75 |
| INIC3       | 714                                                   | 1.74 | 707       | 1.75 | 700       | 1.77 | 694       | 1.79 | 688       | 1.80 | 682       | 1.82 | 676       | 1.83 | 665 | 1.86 | 710                                             | 1.75 |
| IPIC        | 729                                                   | 1.70 | 722       | 1.72 | 715       | 1.73 | 709       | 1.75 | 702       | 1.77 | 696       | 1.78 | 690       | 1.80 | 679 | 1.83 | 761                                             | 1.63 |
| IPIC-4F     | 736                                                   | 1.68 | 729       | 1.70 | 722       | 1.72 | 716       | 1.73 | 710       | 1.75 | 704       | 1.76 | 699       | 1.77 | 688 | 1.80 | 776                                             | 1.60 |
| IPIC-4Cl    | 746                                                   | 1.66 | 739       | 1.68 | 732       | 1.69 | 725       | 1.71 | 718       | 1.73 | 712       | 1.74 | 706       | 1.76 | 694 | 1.79 | 790                                             | 1.57 |

<sup>a</sup> XC and HFX in PCM-TD-DFT-XC-HFX/6-31G(d,p) denote the exchange-correlation functional and percentage of Hartree-Fock exact-exchange, respectively.

**Table S22** Statistical analysis of transition wavelengths and energies using actual theoretical data for excited states of all FREAs<sup>a</sup>

| Functional Used | With various HFX (%) | without fit |       |     |      |     |      | with linear fit |      |     |      |
|-----------------|----------------------|-------------|-------|-----|------|-----|------|-----------------|------|-----|------|
|                 |                      | MSE         |       | MAE |      | RMS |      | MAE             |      | RMS |      |
|                 |                      | nm          | eV    | nm  | eV   | nm  | eV   | nm              | eV   | nm  | eV   |
| B3LYP           | B3LYP                | -28         | 0.08  | 34  | 0.09 | 40  | 0.12 | 22              | 0.06 | 28  | 0.08 |
|                 | B3LYP-21HFX          | -21         | 0.06  | 30  | 0.08 | 36  | 0.11 | 22              | 0.06 | 28  | 0.08 |
|                 | B3LYP-22HFX          | -15         | 0.05  | 26  | 0.07 | 32  | 0.10 | 22              | 0.06 | 28  | 0.08 |
|                 | B3LYP-23HFX          | -9          | 0.03  | 22  | 0.06 | 29  | 0.09 | 21              | 0.06 | 28  | 0.07 |
|                 | B3LYP-24HFX          | -3          | 0.01  | 21  | 0.06 | 28  | 0.08 | 21              | 0.06 | 27  | 0.07 |
|                 | B3LYP-25HFX          | 3           | 0.00  | 22  | 0.06 | 28  | 0.08 | 21              | 0.06 | 27  | 0.07 |
| B3PW91          | B3PW91               | -24         | 0.07  | 32  | 0.09 | 37  | 0.11 | 22              | 0.06 | 28  | 0.08 |
|                 | B3PW91-21HFX         | -18         | 0.05  | 27  | 0.07 | 33  | 0.10 | 22              | 0.06 | 28  | 0.08 |
|                 | B3PW91-22HFX         | -11         | 0.04  | 24  | 0.07 | 30  | 0.09 | 21              | 0.06 | 28  | 0.08 |
|                 | B3PW91-23HFX         | -5          | 0.02  | 21  | 0.06 | 28  | 0.08 | 21              | 0.06 | 27  | 0.07 |
|                 | B3PW91-24HFX         | 1           | 0.01  | 21  | 0.06 | 28  | 0.08 | 21              | 0.06 | 27  | 0.07 |
|                 | B3PW91-25HFX         | 7           | -0.01 | 22  | 0.06 | 28  | 0.08 | 20              | 0.06 | 27  | 0.07 |
| mPW3PBE         | mPW3PBE              | -24         | 0.07  | 32  | 0.09 | 37  | 0.11 | 22              | 0.06 | 28  | 0.08 |
|                 | mPW3PBE-21HFX        | -18         | 0.05  | 27  | 0.07 | 33  | 0.10 | 22              | 0.06 | 28  | 0.08 |
|                 | mPW3PBE-22HFX        | -11         | 0.04  | 24  | 0.07 | 30  | 0.09 | 21              | 0.06 | 28  | 0.08 |
|                 | mPW3PBE-23HFX        | -5          | 0.02  | 21  | 0.06 | 28  | 0.08 | 21              | 0.06 | 28  | 0.07 |
|                 | mPW3PBE-24HFX        | 1           | 0.00  | 21  | 0.06 | 28  | 0.08 | 21              | 0.06 | 27  | 0.07 |
|                 | mPW3PBE-25HFX        | 7           | -0.01 | 23  | 0.06 | 28  | 0.08 | 21              | 0.06 | 27  | 0.07 |

<sup>a</sup> MSE: mean signed error; MAE: mean absolute error; RMS: root mean squared error; HFX: percentage of Hartree-Fock exact exchange.

**Table S23** Statistical analysis of transition wavelengths and energies using actual theoretical data for excited states of all FREAs<sup>a</sup>

| Functional Used | With various HFX (%) | without fit |       |     |      |     |      | with linear fit |      |     |      |
|-----------------|----------------------|-------------|-------|-----|------|-----|------|-----------------|------|-----|------|
|                 |                      | MSE         |       | MAE |      | RMS |      | MAE             |      | RMS |      |
|                 |                      | nm          | eV    | nm  | eV   | nm  | eV   | nm              | eV   | nm  | eV   |
| X3LYP           | X3LYP-20HFX          | -27         | 0.08  | 34  | 0.09 | 40  | 0.12 | 22              | 0.06 | 29  | 0.08 |
|                 | X3LYP                | -16         | 0.05  | 26  | 0.07 | 32  | 0.10 | 22              | 0.06 | 28  | 0.08 |
|                 | X3LYP-22HFX          | -14         | 0.04  | 25  | 0.07 | 32  | 0.10 | 22              | 0.06 | 28  | 0.08 |
|                 | X3LYP-23HFX          | -8          | 0.03  | 22  | 0.06 | 29  | 0.09 | 21              | 0.06 | 28  | 0.08 |
|                 | X3LYP-24HFX          | -2          | 0.01  | 21  | 0.06 | 28  | 0.08 | 21              | 0.06 | 27  | 0.07 |
|                 | X3LYP-25HFX          | 4           | 0.00  | 22  | 0.06 | 28  | 0.08 | 21              | 0.06 | 27  | 0.07 |
| B971            | B971-20HFX           | -26         | 0.07  | 33  | 0.09 | 38  | 0.11 | 22              | 0.06 | 29  | 0.08 |
|                 | B971                 | -19         | 0.06  | 28  | 0.08 | 34  | 0.10 | 22              | 0.06 | 28  | 0.08 |
|                 | B971-22HFX           | -12         | 0.04  | 24  | 0.07 | 31  | 0.09 | 22              | 0.06 | 28  | 0.08 |
|                 | B971-23HFX           | -6          | 0.02  | 22  | 0.06 | 29  | 0.09 | 21              | 0.06 | 28  | 0.07 |
|                 | B971-24HFX           | 0           | 0.01  | 21  | 0.06 | 28  | 0.08 | 21              | 0.06 | 27  | 0.07 |
|                 | B971-25HFX           | 6           | -0.01 | 22  | 0.06 | 28  | 0.08 | 21              | 0.06 | 27  | 0.07 |
| B972            | B972-20HFX           | -22         | 0.06  | 30  | 0.08 | 36  | 0.11 | 22              | 0.06 | 28  | 0.08 |
|                 | B972                 | -16         | 0.05  | 26  | 0.07 | 32  | 0.10 | 22              | 0.06 | 28  | 0.08 |
|                 | B972-22HFX           | -9          | 0.03  | 23  | 0.06 | 29  | 0.09 | 21              | 0.06 | 28  | 0.08 |
|                 | B972-23HFX           | -3          | 0.02  | 21  | 0.06 | 28  | 0.08 | 21              | 0.06 | 27  | 0.07 |
|                 | B972-24HFX           | 3           | 0.00  | 22  | 0.06 | 28  | 0.08 | 21              | 0.06 | 27  | 0.07 |
|                 | B972-25HFX           | 9           | -0.02 | 23  | 0.06 | 29  | 0.08 | 21              | 0.06 | 27  | 0.07 |

<sup>a</sup> MSE: mean signed error; MAE: mean absolute error; RMS: root mean squared error; HFX: percentage of Hartree-Fock exact exchange.

**Table S24** Statistical analysis of transition wavelengths and energies using actual theoretical data for excited states of all FREAs<sup>a</sup>

| Functional Used | With various HFX (%) | without fit |      |     |      |     |      | with linear fit |      |     |      |
|-----------------|----------------------|-------------|------|-----|------|-----|------|-----------------|------|-----|------|
|                 |                      | MSE         |      | MAE |      | RMS |      | MAE             |      | RMS |      |
|                 |                      | nm          | eV   | nm  | eV   | nm  | eV   | nm              | eV   | nm  | eV   |
| B98             | B98-20HFX            | -27         | 0.07 | 34  | 0.09 | 39  | 0.11 | 22              | 0.06 | 29  | 0.08 |
|                 | B98-21HFX            | -20         | 0.06 | 29  | 0.08 | 35  | 0.10 | 22              | 0.06 | 28  | 0.08 |
|                 | B98                  | -14         | 0.04 | 25  | 0.07 | 31  | 0.09 | 22              | 0.06 | 28  | 0.08 |
|                 | B98-23HFX            | -7          | 0.03 | 22  | 0.06 | 29  | 0.09 | 21              | 0.06 | 28  | 0.08 |
|                 | B98-24HFX            | -1          | 0.01 | 21  | 0.06 | 28  | 0.08 | 21              | 0.06 | 28  | 0.07 |
|                 | B98-25HFX            | 5           | 0.00 | 22  | 0.06 | 28  | 0.08 | 21              | 0.06 | 27  | 0.07 |

<sup>a</sup> MSE: mean signed error; MAE: mean absolute error; RMS: root mean squared error; HFX: percentage of Hartree-Fock exact exchange.

**Table S25** Statistical analysis of transition wavelengths and energies using actual theoretical data for excited states of all FREAs<sup>a</sup>

| Functional Used | With various HFX (%) | without fit |       |     |      |     |      | with linear fit |      |     |      |
|-----------------|----------------------|-------------|-------|-----|------|-----|------|-----------------|------|-----|------|
|                 |                      | MSE         |       | MAE |      | RMS |      | MAE             |      | RMS |      |
|                 |                      | nm          | eV    | nm  | eV   | nm  | eV   | nm              | eV   | nm  | eV   |
| APF             | APF-20HFX            | -23         | 0.06  | 31  | 0.08 | 36  | 0.11 | 22              | 0.06 | 28  | 0.08 |
|                 | APF-21HFX            | -16         | 0.05  | 26  | 0.07 | 32  | 0.10 | 22              | 0.06 | 28  | 0.08 |
|                 | APF-22HFX            | -10         | 0.03  | 23  | 0.06 | 29  | 0.09 | 21              | 0.06 | 28  | 0.07 |
|                 | APF                  | -4          | 0.02  | 21  | 0.06 | 28  | 0.08 | 21              | 0.06 | 28  | 0.07 |
|                 | APF-24HFX            | 3           | 0.00  | 22  | 0.06 | 28  | 0.08 | 21              | 0.06 | 27  | 0.07 |
|                 | APF-25HFX            | 9           | -0.01 | 23  | 0.06 | 29  | 0.08 | 21              | 0.06 | 27  | 0.07 |
| APFD            | APFD-20HFX           | -23         | 0.06  | 31  | 0.08 | 36  | 0.11 | 22              | 0.06 | 28  | 0.08 |
|                 | APFD-21HFX           | -16         | 0.05  | 26  | 0.07 | 32  | 0.10 | 22              | 0.06 | 28  | 0.08 |
|                 | APFD-22HFX           | -10         | 0.03  | 23  | 0.06 | 29  | 0.09 | 21              | 0.06 | 28  | 0.07 |
|                 | APFD                 | -4          | 0.02  | 21  | 0.06 | 28  | 0.08 | 21              | 0.06 | 28  | 0.07 |
|                 | APFD-24HFX           | 3           | 0.00  | 22  | 0.06 | 28  | 0.08 | 21              | 0.06 | 27  | 0.07 |
|                 | APFD-25HFX           | 9           | -0.01 | 23  | 0.06 | 29  | 0.08 | 21              | 0.06 | 27  | 0.07 |

<sup>a</sup> MSE: mean signed error; MAE: mean absolute error; RMS: root mean squared error; HFX: percentage of Hartree-Fock exact exchange.

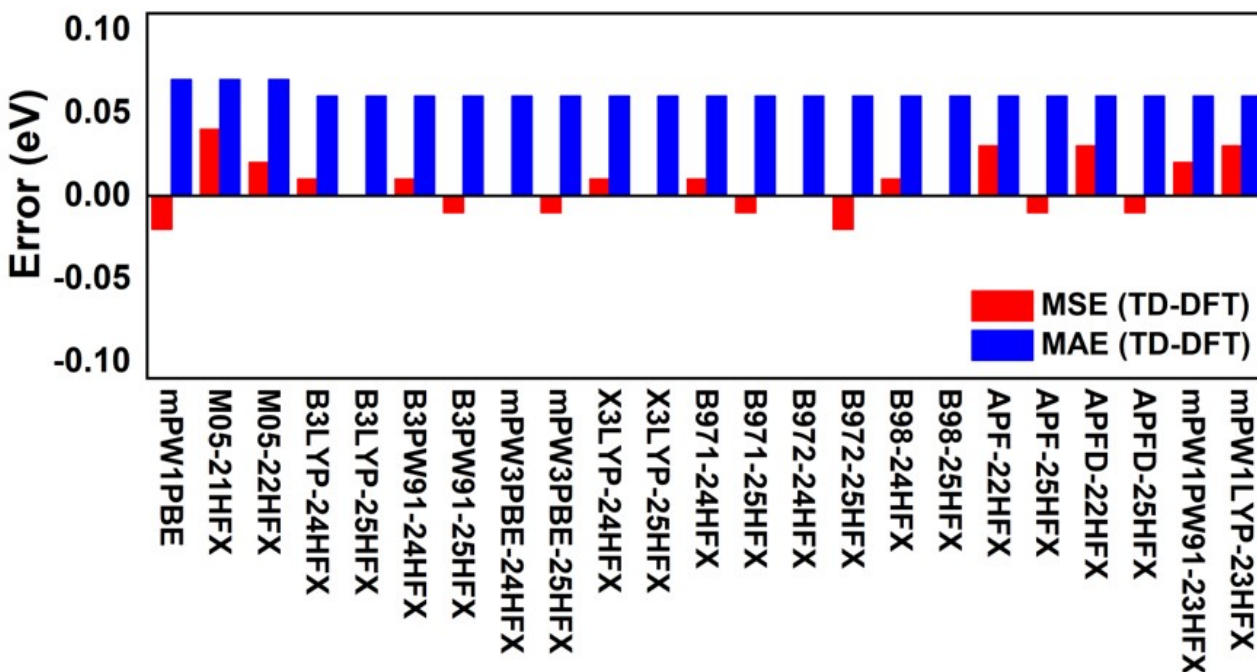

**Fig. S5** MAEs and MSEs obtained from experimental data and that calculated with PCM-TD/6-31G(d,p) using new version of functionals with the best performing HFX ratio.

**Table S26** Statistical analysis of transition wavelengths and energies using actual theoretical data for excited states of all FREAs<sup>a</sup>

| Functional Used | With various HFX (%) | without fit |       |     |      |     |      | with linear fit |      |     |      |
|-----------------|----------------------|-------------|-------|-----|------|-----|------|-----------------|------|-----|------|
|                 |                      | MSE         |       | MAE |      | RMS |      | MAE             |      | RMS |      |
|                 |                      | nm          | eV    | nm  | eV   | nm  | eV   | nm              | eV   | nm  | eV   |
| PBE0            | PBE0-20HFX           | -21         | 0.06  | 30  | 0.08 | 36  | 0.11 | 22              | 0.06 | 28  | 0.08 |
|                 | PBE0-21HFX           | -15         | 0.05  | 26  | 0.07 | 32  | 0.10 | 22              | 0.06 | 28  | 0.08 |
|                 | PBE0-22HFX           | -8          | 0.03  | 23  | 0.06 | 29  | 0.09 | 22              | 0.06 | 28  | 0.08 |
|                 | PBE0-23HFX           | -2          | 0.01  | 21  | 0.06 | 28  | 0.08 | 21              | 0.06 | 28  | 0.07 |
|                 | PBE0-24HFX           | 4           | 0.00  | 22  | 0.06 | 28  | 0.08 | 21              | 0.06 | 27  | 0.07 |
|                 | PBE0                 | 10          | -0.02 | 23  | 0.07 | 29  | 0.08 | 21              | 0.06 | 27  | 0.07 |
| mPW1PW91        | mPW1PW91-20HFX       | -22         | 0.06  | 30  | 0.08 | 36  | 0.11 | 22              | 0.06 | 29  | 0.08 |
|                 | mPW1PW91-21HFX       | -16         | 0.05  | 26  | 0.07 | 32  | 0.10 | 22              | 0.06 | 28  | 0.08 |
|                 | mPW1PW91-22HFX       | -9          | 0.03  | 23  | 0.06 | 30  | 0.09 | 22              | 0.06 | 28  | 0.08 |
|                 | mPW1PW91-23HFX       | -3          | 0.02  | 21  | 0.06 | 28  | 0.08 | 21              | 0.06 | 28  | 0.07 |
|                 | mPW1PW91-24HFX       | 3           | 0.00  | 22  | 0.06 | 28  | 0.08 | 21              | 0.06 | 27  | 0.07 |
|                 | mPW1PW91             | 9           | -0.02 | 23  | 0.06 | 29  | 0.08 | 21              | 0.06 | 27  | 0.07 |
| mPW1LYP         | mPW1LYP-20HFX        | -27         | 0.07  | 33  | 0.09 | 39  | 0.12 | 23              | 0.06 | 29  | 0.08 |
|                 | mPW1LYP-21HFX        | -20         | 0.06  | 29  | 0.08 | 35  | 0.10 | 22              | 0.06 | 28  | 0.08 |
|                 | mPW1LYP-22HFX        | -14         | 0.04  | 25  | 0.07 | 31  | 0.10 | 22              | 0.06 | 28  | 0.08 |
|                 | mPW1LYP-23HFX        | -7          | 0.03  | 22  | 0.06 | 29  | 0.09 | 21              | 0.06 | 28  | 0.08 |
|                 | mPW1LYP-24HFX        | -1          | 0.01  | 21  | 0.06 | 28  | 0.08 | 21              | 0.06 | 28  | 0.07 |
|                 | mPW1LYP              | 5           | 0.00  | 22  | 0.06 | 28  | 0.08 | 21              | 0.06 | 27  | 0.07 |
| mPW1PBE         | mPW1PBE-20HFX        | -22         | 0.06  | 30  | 0.08 | 36  | 0.11 | 22              | 0.06 | 29  | 0.08 |
|                 | mPW1PBE-21HFX        | -15         | 0.05  | 26  | 0.07 | 32  | 0.10 | 22              | 0.06 | 28  | 0.08 |
|                 | mPW1PBE-22HFX        | -9          | 0.03  | 23  | 0.06 | 29  | 0.09 | 22              | 0.06 | 28  | 0.08 |
|                 | mPW1PBE-23HFX        | -3          | 0.02  | 21  | 0.06 | 28  | 0.08 | 21              | 0.06 | 28  | 0.07 |
|                 | mPW1PBE-24HFX        | 3           | 0.00  | 22  | 0.06 | 28  | 0.08 | 21              | 0.06 | 27  | 0.07 |
|                 | mPW1PBE              | 9           | -0.02 | 23  | 0.07 | 29  | 0.08 | 21              | 0.06 | 27  | 0.07 |

<sup>a</sup> MSE: mean signed error; MAE: mean absolute error; RMS: root mean squared error; HFX: percentage of Hartree-Fock exact exchange.

**Table S27** Statistical analysis of transition wavelengths and energies using actual theoretical data for excited states of all FREAs<sup>a</sup>

| Functional Used | With various HFX (%) | without fit |       |     |      |     |      | with linear fit |      |     |      |
|-----------------|----------------------|-------------|-------|-----|------|-----|------|-----------------|------|-----|------|
|                 |                      | MSE         |       | MAE |      | RMS |      | MAE             |      | RMS |      |
|                 |                      | nm          | eV    | nm  | eV   | nm  | eV   | nm              | eV   | nm  | eV   |
| M05             | M05-20HFX            | -19         | 0.06  | 29  | 0.08 | 36  | 0.11 | 24              | 0.07 | 30  | 0.08 |
|                 | M05-21HFX            | -12         | 0.04  | 25  | 0.07 | 33  | 0.10 | 24              | 0.07 | 30  | 0.08 |
|                 | M05-22HFX            | -6          | 0.02  | 23  | 0.07 | 31  | 0.10 | 23              | 0.07 | 30  | 0.08 |
|                 | M05-23HFX            | 1           | 0.01  | 23  | 0.07 | 30  | 0.09 | 23              | 0.07 | 29  | 0.08 |
|                 | M05-24HFX            | 7           | -0.01 | 25  | 0.07 | 31  | 0.09 | 23              | 0.07 | 29  | 0.08 |
|                 | M05-25HFX            | 13          | -0.02 | 27  | 0.08 | 33  | 0.09 | 23              | 0.07 | 29  | 0.08 |
|                 | M05-26HFX            | 18          | -0.04 | 30  | 0.08 | 35  | 0.10 | 23              | 0.06 | 29  | 0.08 |
|                 | M05                  | 29          | -0.07 | 36  | 0.10 | 42  | 0.11 | 23              | 0.06 | 29  | 0.08 |
| M06             | M06-20HFX            | -30         | 0.08  | 36  | 0.10 | 42  | 0.12 | 23              | 0.06 | 29  | 0.08 |
|                 | M06-21HFX            | -23         | 0.07  | 31  | 0.08 | 37  | 0.11 | 23              | 0.06 | 29  | 0.08 |
|                 | M06-22HFX            | -16         | 0.05  | 26  | 0.07 | 33  | 0.10 | 22              | 0.06 | 29  | 0.08 |
|                 | M06-23HFX            | -10         | 0.03  | 23  | 0.07 | 30  | 0.10 | 22              | 0.06 | 28  | 0.08 |
|                 | M06-24HFX            | -4          | 0.02  | 21  | 0.06 | 29  | 0.09 | 22              | 0.06 | 28  | 0.08 |
|                 | M06-25HFX            | 2           | 0.00  | 22  | 0.06 | 29  | 0.09 | 22              | 0.06 | 28  | 0.08 |
|                 | M06-26HFX            | 8           | -0.01 | 24  | 0.07 | 30  | 0.09 | 21              | 0.06 | 28  | 0.08 |
|                 | M06                  | 13          | -0.03 | 26  | 0.07 | 31  | 0.09 | 21              | 0.06 | 28  | 0.07 |

<sup>a</sup> MSE: mean signed error; MAE: mean absolute error; RMS: root mean squared error; HFX: percentage of Hartree-Fock exact exchange.

## Cartesian Coordinates

Below are the cartesian coordinates for all the studied set of FREAs optimized in chloroform solvent using DFT-PBE0/6-31G(d,p) and PCM solvent model. All data is in Å. These cartesian coordinates have been taken from our previous study.<sup>1</sup>

### Cz-RH

```
0 1
C -1.10965700 -2.20947800 0.12249400
C -0.70982400 -3.56983600 0.08260400
C 0.71252000 -3.57044500 -0.11732300
C 1.10952100 -2.21043300 -0.18593600
N -0.00325700 -1.40518500 -0.05647400
C 1.67983900 -4.57176000 -0.24160800
C 3.00344100 -4.21529300 -0.42532000
C 3.39690600 -2.85774900 -0.49287600
C 2.43867900 -1.84428600 -0.36971700
C -2.43521800 -1.84226000 0.32923100
C -3.39062900 -2.85497100 0.47797300
C -2.99674300 -4.21287000 0.42311500
C -1.67443100 -4.57035100 0.23198000
C -0.00045600 0.03695400 -0.04118100
C 4.80662600 -2.53026000 -0.68733500
C -4.79647000 -2.52529000 0.69522300
S 5.45359400 -1.01113700 -0.16562700
C 7.04724900 -1.41694300 -0.75113500
C 7.03393200 -2.69269000 -1.30812700
C 5.78321500 -3.31805200 -1.27310900
C -5.76147600 -3.30386300 1.31165900
C -7.01103200 -2.67717100 1.36217600
C -7.03497700 -1.40988100 0.78645400
S -5.45335900 -1.01422800 0.16278700
C 8.24364100 -0.64306300 -0.70779500
C -8.23134400 -0.63525200 0.75676300
C 8.54283700 0.60108200 -0.24155000
C -8.53926000 0.60182300 0.27759000
C 7.65131300 1.56776800 0.39103800
N 8.35404900 2.73321100 0.72634900
C 9.67957100 2.77433200 0.41077000
S 10.16662800 1.27685100 -0.34974000
S -10.15932400 1.28199200 0.41124200
C -9.68811500 2.76521500 -0.38626000
N -8.37020600 2.71656100 -0.73128700
C -7.66114000 1.55639900 -0.39116200
O -6.47543900 1.42023500 -0.64630900
O 6.46011700 1.43695200 0.62223500
C -7.67607600 3.81641000 -1.39631500
C 7.64619100 3.84605800 1.35423500
C 7.06954300 4.80642400 0.32726300
C -7.07341400 4.79467100 -0.40169700
S -10.74307200 4.00752700 -0.65707600
S 10.73011400 4.01976500 0.68440300
H 1.40032500 -5.61956500 -0.18306200
H 3.76070300 -4.98936000 -0.48972200
H 2.72927500 -0.80046200 -0.43622000
H -2.72331900 -0.79861500 0.40715400
H -3.75205100 -4.98667100 0.50980300
H -1.39318300 -5.61856300 0.19181300
H -0.94891300 0.40877400 -0.43312200
H 0.14908800 0.43420200 0.96860800
H 0.79456500 0.40879400 -0.69018900
H 7.92435700 -3.13929400 -1.73789800
H 5.58695600 -4.29896100 -1.68917200
H -5.55714600 -4.27842400 1.73865600
H -7.89274500 -3.11640400 1.81679000
H 9.08106700 -1.18497900 -1.14657100
H -9.05966800 -1.16913400 1.22191800
```



|   |             |            |             |
|---|-------------|------------|-------------|
| H | -6.90040900 | 3.35478200 | -2.01085600 |
| H | -8.40431900 | 4.30660800 | -2.04538300 |
| H | 6.85503700  | 3.39705500 | 1.95827800  |
| H | 8.35943700  | 4.34731300 | 2.01144500  |
| H | 6.54415300  | 5.61745000 | 0.83904700  |
| H | 7.86161400  | 5.24429100 | -0.28559500 |
| H | 6.35675800  | 4.29499400 | -0.32492600 |
| H | -6.55958800 | 5.59505200 | -0.94122300 |
| H | -7.84972700 | 5.24532500 | 0.22199600  |
| H | -6.34561600 | 4.29424500 | 0.24237900  |

## Flu-RH

|     |              |             |             |
|-----|--------------|-------------|-------------|
| 0 1 |              |             |             |
| C   | -1.17353200  | -2.01317500 | -0.01464600 |
| C   | -0.72823000  | -0.67892900 | -0.00992100 |
| C   | 0.72822400   | -0.67892700 | 0.00952100  |
| C   | 1.17352300   | -2.01317400 | 0.01461800  |
| C   | -0.00000600  | -2.97990300 | 0.00012700  |
| C   | 1.65003500   | 0.36735000  | 0.02307800  |
| C   | 3.00448600   | 0.06957100  | 0.03968700  |
| C   | 3.46843800   | -1.26007600 | 0.04296400  |
| C   | 2.52349300   | -2.30523100 | 0.03062000  |
| C   | -2.52350300  | -2.30523400 | -0.03056200 |
| C   | -3.46844500  | -1.26008000 | -0.04320700 |
| C   | -3.00449000  | 0.06956800  | -0.04030200 |
| C   | -1.65003900  | 0.36734700  | -0.02376800 |
| C   | -0.01557300  | -3.85819600 | 1.25962300  |
| C   | 0.01555800   | -3.85856100 | -1.25911600 |
| C   | 4.89706600   | -1.56039800 | 0.05890100  |
| C   | -4.89707300  | -1.56040200 | -0.05906700 |
| S   | 6.08134500   | -0.29322000 | 0.06192400  |
| C   | 7.40064400   | -1.43396000 | 0.08268800  |
| C   | 6.90045600   | -2.73273700 | 0.08571200  |
| C   | 5.50477200   | -2.80630900 | 0.07242700  |
| C   | -5.50477700  | -2.80631300 | -0.07261100 |
| C   | -6.90046300  | -2.73274400 | -0.08580600 |
| C   | -7.40065200  | -1.43396800 | -0.08269800 |
| S   | -6.08135400  | -0.29322700 | -0.06195300 |
| C   | 8.80364500   | -1.18268900 | 0.09723200  |
| C   | -8.80365400  | -1.18269700 | -0.09715300 |
| C   | 9.55707300   | -0.04809000 | 0.10163600  |
| C   | -9.55708200  | -0.04809700 | -0.10148000 |
| C   | 9.10322500   | 1.33915200  | 0.08903900  |
| N   | 10.19995300  | 2.21168600  | 0.11156700  |
| C   | 11.44220600  | 1.65104600  | 0.12519500  |
| S   | 11.31837500  | -0.09341700 | 0.12488700  |
| S   | -11.31838600 | -0.09342000 | -0.12463600 |
| C   | -11.44221300 | 1.65104400  | -0.12486600 |
| N   | -10.19995800 | 2.21168000  | -0.11139400 |
| C   | -9.10323000  | 1.33914500  | -0.08889300 |
| O   | 7.95173400   | 1.74204200  | 0.06484400  |
| S   | 12.89219700  | 2.44250300  | 0.14634600  |
| C   | 9.97330200   | 3.65461100  | 0.08739500  |
| C   | 9.91799700   | 4.20027900  | -1.32974800 |
| S   | -12.89219900 | 2.44250400  | -0.14625700 |
| O   | -7.95173600  | 1.74203200  | -0.06480600 |
| C   | -9.97330200  | 3.65460800  | -0.08737600 |
| C   | -9.91786700  | 4.20040400  | 1.32971300  |
| H   | 1.32356400   | 1.40313900  | 0.02150800  |
| H   | 3.71785700   | 0.88891700  | 0.05081400  |
| H   | 2.85454600   | -3.33942900 | 0.03300700  |
| H   | -2.85456000  | -3.33943100 | -0.03262600 |
| H   | -3.71786000  | 0.88891100  | -0.05168500 |
| H   | -1.32356400  | 1.40313600  | -0.02249000 |
| H   | -0.90053300  | -4.50249000 | 1.26687300  |
| H   | 0.86897500   | -4.50240500 | 1.28878700  |
| H   | -0.02683500  | -3.24713300 | 2.16636400  |
| H   | 0.90052200   | -4.50285200 | -1.26618900 |
| H   | -0.86898500  | -4.50278600 | -1.28808900 |
| H   | 0.02681000   | -3.24775800 | -2.16603300 |
| H   | 7.55322900   | -3.59924300 | 0.09806800  |
| H   | 4.96073200   | -3.74267700 | 0.07346400  |
| H   | -4.96073400  | -3.74268000 | -0.07374900 |
| H   | -7.55323400  | -3.59925100 | -0.09817400 |
| H   | 9.37091200   | -2.11284500 | 0.10880600  |
| H   | -9.37092300  | -2.11285200 | -0.10872200 |
| H   | 9.02739400   | 3.81878200  | 0.60769300  |
| H   | 10.78217900  | 4.11376900  | 0.65909500  |

|   |              |            |             |
|---|--------------|------------|-------------|
| H | 9.74043700   | 5.27881700 | -1.29925000 |
| H | 10.86083000  | 4.02300700 | -1.85358500 |
| H | 9.10483200   | 3.73574400 | -1.89356600 |
| H | -9.02744000  | 3.81872800 | -0.60777300 |
| H | -10.78222800 | 4.11371800 | -0.65904600 |
| H | -9.74031100  | 5.27894000 | 1.29909900  |
| H | -10.86065000 | 4.02317900 | 1.85365300  |
| H | -9.10464800  | 3.73592200 | 1.89349800  |

## FR-d2

|     |              |             |             |
|-----|--------------|-------------|-------------|
| 0 1 |              |             |             |
| C   | -0.72674600  | -2.52718200 | -0.30557000 |
| C   | -1.39870900  | -1.30622400 | -0.48530600 |
| C   | -0.42614600  | -0.19846700 | -0.85764300 |
| C   | 0.89125300   | -0.95735800 | -0.86897000 |
| C   | 0.69644500   | -2.31073400 | -0.54329800 |
| C   | 2.16103100   | -0.47757500 | -1.13462600 |
| C   | 3.26638800   | -1.34720100 | -1.08195000 |
| C   | 3.05505600   | -2.69816400 | -0.75246200 |
| C   | 1.78120900   | -3.18372400 | -0.48651800 |
| C   | -1.43535800  | -3.67375100 | 0.04993000  |
| C   | -2.81117300  | -3.58692100 | 0.21366400  |
| C   | -3.49992600  | -2.37420300 | 0.02671500  |
| C   | -2.77017000  | -1.22349300 | -0.32187100 |
| C   | -0.74676800  | 0.38723700  | -2.24050100 |
| C   | -0.42209900  | 0.91530000  | 0.19973300  |
| C   | 4.61006000   | -0.83645800 | -1.40271900 |
| C   | -7.88049500  | -2.35434900 | 0.40620300  |
| C   | 4.80234200   | 0.13774700  | -2.36310400 |
| C   | 6.06791100   | 0.67607800  | -2.68447100 |
| C   | 7.23647900   | 0.26462000  | -2.07391700 |
| C   | 7.10285300   | -0.76029100 | -1.08239000 |
| C   | 5.80001600   | -1.29968300 | -0.74882800 |
| C   | -7.11707800  | -1.21470200 | 0.81881100  |
| C   | -5.67361800  | -1.20979000 | 0.69425600  |
| C   | -4.96515500  | -2.34171300 | 0.16932100  |
| C   | -5.75160500  | -3.41915500 | -0.19059300 |
| C   | -7.15920900  | -3.42783600 | -0.07802200 |
| N   | 8.09905300   | -1.32417900 | -0.39880000 |
| S   | 7.42201900   | -2.41615100 | 0.59317800  |
| N   | 5.85607200   | -2.23836400 | 0.20006400  |
| N   | -7.60389200  | -0.10403600 | 1.37382800  |
| S   | -6.33150200  | 0.85391500  | 1.68781500  |
| N   | -5.11799700  | -0.08528500 | 1.15467400  |
| C   | -9.32337500  | -2.42027700 | 0.49539000  |
| C   | 10.59014200  | 1.44092200  | -2.16896100 |
| C   | 10.25324300  | 1.78710900  | -3.46649700 |
| C   | 8.91428800   | 1.41022100  | -3.65171600 |
| C   | 8.50724300   | 0.83878500  | -2.46215600 |
| O   | 9.51908600   | 0.86058300  | -1.56848700 |
| O   | -10.03281200 | -1.27472300 | 0.42532700  |
| C   | -11.34834500 | -1.59375700 | 0.52550000  |
| C   | -11.47516600 | -2.96491500 | 0.66994400  |
| C   | -10.17639700 | -3.49672200 | 0.64012000  |
| C   | 11.85061400  | 1.61307000  | -1.53876700 |
| C   | 12.29420800  | 1.42895500  | -0.26536000 |
| C   | -12.38883100 | -0.62817000 | 0.50945100  |
| C   | -12.41183100 | 0.70792400  | 0.25098100  |
| S   | -13.89413000 | 1.64265800  | 0.44381600  |
| C   | -13.12196700 | 3.13113200  | -0.05342200 |
| N   | -11.82038800 | 2.90211800  | -0.36971700 |
| C   | -11.33826800 | 1.58266700  | -0.24494800 |
| S   | 13.99903200  | 1.63371400  | 0.13563200  |
| C   | 13.73727800  | 1.24866000  | 1.82156100  |
| N   | 12.42085000  | 0.99753300  | 2.04682300  |
| C   | 11.53768900  | 1.10448000  | 0.95318200  |
| O   | 10.33877000  | 0.96820000  | 1.08319400  |
| O   | -10.20378500 | 1.28362400  | -0.55554700 |
| S   | -13.92928900 | 4.57294100  | -0.11165900 |
| S   | 14.96793900  | 1.21038500  | 2.92488200  |
| C   | -10.91027000 | 3.95212400  | -0.81782200 |
| C   | 11.88186300  | 0.69034500  | 3.36872500  |
| C   | 11.48963000  | 1.94510600  | 4.13112200  |
| C   | -10.16954300 | 4.59476500  | 0.34313200  |
| H   | 2.31623400   | 0.57576100  | -1.35458300 |
| H   | 3.90305600   | -3.37131700 | -0.71102100 |

|   |              |             |             |
|---|--------------|-------------|-------------|
| H | 1.64215900   | -4.23271300 | -0.24053800 |
| H | -0.92678300  | -4.62025100 | 0.20980500  |
| H | -3.36453400  | -4.46901300 | 0.52151800  |
| H | -3.29001400  | -0.28219300 | -0.46428700 |
| H | -0.00204000  | 1.13941000  | -2.52042300 |
| H | -0.75374500  | -0.39248300 | -3.00736700 |
| H | -1.72836000  | 0.87184700  | -2.23312000 |
| H | -1.40105600  | 1.40295400  | 0.24579000  |
| H | -0.19052200  | 0.51628900  | 1.19115600  |
| H | 0.32392100   | 1.67725100  | -0.04818300 |
| H | 3.94256400   | 0.50732500  | -2.91286200 |
| H | 6.11349000   | 1.45847700  | -3.43583000 |
| H | -5.27594600  | -4.29360900 | -0.62310600 |
| H | -7.69359900  | -4.30635200 | -0.42633100 |
| H | 10.91386900  | 2.25125100  | -4.18552400 |
| H | 8.32200300   | 1.50575900  | -4.54989900 |
| H | -12.40590600 | -3.50238900 | 0.78683900  |
| H | -9.88654000  | -4.53187500 | 0.74607100  |
| H | 12.59666400  | 1.95548300  | -2.25378200 |
| H | -13.34538900 | -1.07950500 | 0.76661100  |
| H | -10.21409600 | 3.47231400  | -1.50882700 |
| H | -11.51001400 | 4.68467600  | -1.36130200 |
| H | 11.01413500  | 0.04979800  | 3.19847100  |
| H | 12.64848000  | 0.12455300  | 3.90192900  |
| H | 11.08760500  | 1.66853400  | 5.10974700  |
| H | 12.35566900  | 2.59342300  | 4.28728700  |
| H | 10.72032700  | 2.50208800  | 3.59007500  |
| H | -9.49579500  | 5.36875500  | -0.03485900 |
| H | -10.86904000 | 5.06070500  | 1.04215400  |
| H | -9.57183100  | 3.85309900  | 0.87978900  |

## F(DPP)2B2

|     |              |             |             |
|-----|--------------|-------------|-------------|
| 0 1 |              |             |             |
| C   | -1.11560800  | -1.79419100 | -0.15507400 |
| C   | -0.52656100  | -0.61462100 | -0.64522300 |
| C   | 0.92201600   | -0.77371800 | -0.61134100 |
| C   | 1.21758900   | -2.04969100 | -0.09853300 |
| C   | -0.05496500  | -2.80795000 | 0.24348500  |
| C   | 1.95075300   | 0.09202800  | -0.98012600 |
| C   | 3.26600800   | -0.32716200 | -0.83730000 |
| C   | 3.57735800   | -1.59944700 | -0.32326700 |
| C   | 2.52859800   | -2.46114700 | 0.05084000  |
| C   | -2.48997300  | -1.91202800 | -0.07068500 |
| C   | -3.30854400  | -0.84446600 | -0.48665200 |
| C   | -2.70498400  | 0.32884600  | -0.97520400 |
| C   | -1.32496400  | 0.45262400  | -1.05437100 |
| C   | -0.12656700  | -3.12881600 | 1.74361800  |
| C   | -0.17598400  | -4.09782900 | -0.58056300 |
| C   | 4.96297200   | -2.03369500 | -0.17449900 |
| C   | -4.75984900  | -0.97131500 | -0.40720000 |
| S   | 6.25198200   | -0.88816900 | -0.03299800 |
| C   | 7.45511900   | -2.14694200 | 0.09401400  |
| C   | 6.84498100   | -3.39165100 | 0.02263500  |
| C   | 5.45052600   | -3.32533200 | -0.12862900 |
| C   | -5.51975200  | -2.12572200 | -0.38960700 |
| C   | -6.90077900  | -1.89280800 | -0.30701500 |
| C   | -7.22943900  | -0.54519800 | -0.25743200 |
| S   | -5.78019400  | 0.42511200  | -0.30657100 |
| C   | 8.84046900   | -1.79942000 | 0.23184400  |
| C   | -8.56851500  | -0.04409400 | -0.17453000 |
| N   | -8.93911300  | 1.28714700  | -0.11095100 |
| C   | -10.35341600 | 1.43878100  | -0.03394000 |
| C   | -10.85101700 | 0.08540500  | -0.06168800 |
| C   | -9.74272900  | -0.79369300 | -0.14244000 |
| C   | 9.45408900   | -0.56255300 | 0.06828100  |
| C   | 10.84729500  | -0.70191200 | 0.28594400  |
| C   | 11.11732300  | -2.07577300 | 0.61804500  |
| N   | 9.84267000   | -2.70064400 | 0.56498200  |
| C   | 9.18675700   | 0.80897700  | -0.28830800 |
| N   | 10.47114000  | 1.42495000  | -0.27260400 |
| C   | 11.46636500  | 0.52734400  | 0.07004600  |
| C   | -12.02592800 | -0.65818800 | -0.07462700 |
| N   | -11.65130900 | -1.99308500 | -0.14866600 |
| C   | -10.23927400 | -2.14298100 | -0.19178500 |
| O   | 12.14199000  | -2.68762200 | 0.91084000  |

|   |              |             |             |
|---|--------------|-------------|-------------|
| O | 8.16093100   | 1.42434200  | -0.54929100 |
| C | 12.86535800  | 0.81770000  | 0.17597000  |
| C | 13.82990800  | -0.10636700 | 0.55154700  |
| C | 15.12920400  | 0.42471500  | 0.57486900  |
| C | 15.19112400  | 1.75814000  | 0.22137500  |
| S | 13.61211100  | 2.35887900  | -0.15731100 |
| O | -10.89814700 | 2.53233900  | 0.04639900  |
| O | -9.69218400  | -3.24213500 | -0.24691500 |
| C | -8.09282800  | 2.45619800  | -0.09575800 |
| C | -12.48675000 | -3.16885400 | -0.10226000 |
| C | 9.71857100   | -4.09025800 | 0.93395300  |
| C | 10.59228800  | 2.83312900  | -0.56509600 |
| C | -13.38611400 | -0.20201300 | -0.02800900 |
| S | -13.73027600 | 1.47010600  | 0.33986000  |
| C | -15.43624300 | 1.22502200  | 0.19955600  |
| C | -15.71772900 | -0.08753700 | -0.12068700 |
| C | -14.57136000 | -0.88955400 | -0.24821500 |
| C | 16.36818500  | 2.62117100  | 0.14416100  |
| C | -16.37933100 | 2.32323000  | 0.40598600  |
| C | 16.26582600  | 4.01452900  | 0.27442100  |
| C | 17.39663400  | 4.81855600  | 0.20210600  |
| C | 18.65238600  | 4.24826200  | 0.00628400  |
| C | 18.76710400  | 2.86533900  | -0.12295100 |
| C | 17.63819700  | 2.05861400  | -0.06031800 |
| C | -16.0005400  | 3.66020300  | 0.21235400  |
| C | -16.91049800 | 4.69092100  | 0.41116500  |
| C | -18.21803900 | 4.40832800  | 0.79966300  |
| C | -18.60679400 | 3.08417500  | 0.99431500  |
| C | -17.69746200 | 2.05138900  | 0.80522400  |
| H | 1.73693900   | 1.07804400  | -1.38242700 |
| H | 4.06979800   | 0.33470300  | -1.14780800 |
| H | 2.75657500   | -3.43466900 | 0.47654900  |
| H | -2.94299000  | -2.81190600 | 0.33616500  |
| H | -3.33066300  | 1.14831000  | -1.31820700 |
| H | -0.88360300  | 1.36750700  | -1.43883800 |
| H | -1.07690700  | -3.61437900 | 1.98724700  |
| H | 0.68199200   | -3.80944600 | 2.02879300  |
| H | -0.03976800  | -2.21996400 | 2.34542900  |
| H | -1.12570800  | -4.60013700 | -0.37026000 |
| H | -0.12800400  | -3.88702700 | -1.65252200 |
| H | 0.63368700   | -4.79021200 | -0.32865300 |
| H | 7.38336800   | -4.32804100 | 0.04303400  |
| H | 4.82169000   | -4.20132300 | -0.23660600 |
| H | -5.08588300  | -3.11594900 | -0.46493500 |
| H | -7.66372800  | -2.66675500 | -0.29383600 |
| H | 13.57105900  | -1.13142700 | 0.80320200  |
| H | 16.00182000  | -0.14488700 | 0.87249200  |
| H | -8.76347600  | 3.31441300  | -0.02641700 |
| H | -7.42486200  | 2.45859800  | 0.77018100  |
| H | -7.50616800  | 2.53950400  | -1.01493600 |
| H | -13.17700900 | -3.12717600 | 0.74376000  |
| H | -13.04756200 | -3.30626000 | -1.03184600 |
| H | -11.81274200 | -4.01773800 | 0.02142200  |
| H | 10.68470600  | -4.38488600 | 1.34625100  |
| H | 8.94299100   | -4.22702600 | 1.69127200  |
| H | 9.50609100   | -4.72428000 | 0.06756200  |
| H | 11.20210600  | 3.00821500  | -1.45591700 |
| H | 9.57902900   | 3.19072700  | -0.75623900 |
| H | 11.00918200  | 3.38482400  | 0.28212500  |
| H | -16.72326300 | -0.45392500 | -0.29166300 |
| H | -14.62055600 | -1.93227800 | -0.52570900 |
| H | 15.29582300  | 4.47010700  | 0.45525200  |
| H | 17.29689400  | 5.89459900  | 0.30881100  |
| H | 19.53587400  | 4.87716800  | -0.04701200 |
| H | 19.74073400  | 2.41211900  | -0.28420700 |
| H | 17.73597800  | 0.98534000  | -0.19161500 |
| H | -14.99037300 | 3.89297600  | -0.11542500 |
| H | -16.59846600 | 5.71896500  | 0.25313800  |
| H | -18.92914000 | 5.21459800  | 0.95218100  |
| H | -19.62149700 | 2.85443200  | 1.30589400  |
| H | -18.00208500 | 1.02552000  | 0.98885500  |

## ITDI

|     |            |             |             |
|-----|------------|-------------|-------------|
| O 1 |            |             |             |
| C   | 1.06458400 | -2.12073000 | -0.18799300 |
| C   | 1.81095000 | -0.96015400 | 0.12297100  |
| C   | 3.20104300 | -1.33576400 | 0.04759000  |

|   |              |             |             |
|---|--------------|-------------|-------------|
| C | 3.33504300   | -2.66796100 | -0.29432700 |
| C | 1.97702100   | -3.30869500 | -0.48375400 |
| C | -0.31393500  | -2.07455100 | -0.20574900 |
| C | -0.97966100  | -0.86935800 | 0.09897100  |
| C | -0.21936100  | 0.27304800  | 0.40742100  |
| C | 1.16786600   | 0.24042900  | 0.41879400  |
| S | 4.71343900   | -0.56299400 | 0.28048200  |
| C | 5.56042900   | -2.05045100 | -0.09631700 |
| C | 4.67332700   | -3.08094400 | -0.37892600 |
| C | 1.78784000   | -3.81525700 | -1.92108200 |
| C | 1.74962600   | -4.44932700 | 0.51925300  |
| C | 6.99368800   | -2.12234300 | -0.09154900 |
| C | 7.77640200   | -3.27303400 | -0.14825400 |
| C | 9.14287300   | -3.00058600 | -0.15142600 |
| C | 9.45397100   | -1.64344300 | -0.06174200 |
| S | 7.98478700   | -0.70490700 | -0.02750600 |
| C | -2.43687700  | -0.82684200 | 0.09614700  |
| S | -3.29768000  | 0.66511700  | -0.11407900 |
| C | -4.84363800  | -0.12281200 | 0.01904400  |
| C | -4.67292800  | -1.48242100 | 0.20397800  |
| C | -3.32389200  | -1.87580300 | 0.24601600  |
| C | -8.45851600  | 1.34481300  | -0.14250300 |
| C | -7.54068800  | 2.39641800  | -0.25311800 |
| C | -6.20841200  | 2.00270200  | -0.21007000 |
| C | -6.06564800  | 0.62507000  | -0.06495800 |
| S | -7.60175400  | -0.17377700 | 0.01434100  |
| C | 10.76907200  | -1.12921000 | -0.15442500 |
| C | -9.84803700  | 1.60632400  | -0.16410900 |
| C | 11.30869700  | 0.12832400  | -0.06534500 |
| C | -10.96931500 | 0.81358200  | -0.07130600 |
| C | 12.61189100  | 0.36638600  | -0.75152400 |
| C | 12.72484600  | 1.83470800  | -0.90209100 |
| C | 11.64024700  | 2.45355400  | -0.25640300 |
| C | 10.83966200  | 1.40983700  | 0.41847900  |
| C | -12.35642400 | 1.26125900  | -0.10451100 |
| C | -13.21184100 | 0.06152700  | 0.04142000  |
| C | -12.38905100 | -1.06904800 | 0.15409500  |
| C | -10.97517800 | -0.65288800 | 0.08777400  |
| C | 9.99871400   | 1.62076200  | 1.49275800  |
| C | -12.83583400 | 2.54923000  | -0.24375300 |
| O | 13.38999600  | -0.47841300 | -1.15602300 |
| O | -10.00683500 | -1.39584700 | 0.15407100  |
| C | 13.69334500  | 2.56119100  | -1.57459000 |
| C | 13.55997800  | 3.94783700  | -1.61666500 |
| C | 12.47664400  | 4.57179500  | -0.99349600 |
| C | 11.51070900  | 3.84033200  | -0.30166900 |
| C | -14.59735000 | -0.10034800 | 0.08284600  |
| C | -15.11203900 | -1.38789700 | 0.23556200  |
| C | -14.27869000 | -2.50314800 | 0.34569000  |
| C | -12.89485000 | -2.34897400 | 0.30503400  |
| C | 9.59447700   | 0.56546400  | 2.35824100  |
| N | 9.29844600   | -0.26612800 | 3.11607800  |
| C | 9.60129600   | 2.91736600  | 1.92603400  |
| N | 9.24584600   | 3.96183600  | 2.29550600  |
| C | -14.22195400 | 2.87609700  | -0.26459400 |
| N | -15.33862700 | 3.20262900  | -0.28878200 |
| C | -12.01420000 | 3.70403100  | -0.38354200 |
| N | -11.38783400 | 4.67821900  | -0.50053200 |
| H | -0.89022500  | -2.95520500 | -0.47467700 |
| H | -0.72616900  | 1.19885200  | 0.66478700  |
| H | 1.73356300   | 1.13374800  | 0.66474000  |
| H | 5.00298900   | -4.07799100 | -0.64774200 |
| H | 0.77843600   | -4.21631300 | -2.05573700 |
| H | 1.93965200   | -3.01099400 | -2.64593000 |
| H | 2.50045500   | -4.61688000 | -2.13905100 |
| H | 2.45802900   | -5.26344800 | 0.33655500  |
| H | 1.87986200   | -4.10209200 | 1.54773900  |
| H | 0.73778900   | -4.85343100 | 0.41619900  |
| H | 7.35639600   | -4.27074000 | -0.17717100 |
| H | 9.91428500   | -3.76098300 | -0.20597900 |
| H | -5.50246000  | -2.17135600 | 0.32104200  |
| H | -3.00551100  | -2.89761200 | 0.41498900  |
| H | -7.86689600  | 3.42555700  | -0.35941800 |
| H | -5.37062200  | 2.68736800  | -0.27675900 |
| H | 11.49853600  | -1.87249300 | -0.48250700 |
| H | -10.02618500 | 2.67142400  | -0.27628800 |
| H | 14.52433700  | 2.05177500  | -2.05232600 |
| H | 14.29761600  | 4.54916000  | -2.13881200 |
| H | 12.38117200  | 5.65190800  | -1.04639100 |
| H | 10.68112300  | 4.35384700  | 0.16850400  |

|   |              |             |            |
|---|--------------|-------------|------------|
| H | -15.27935800 | 0.73564100  | 0.00141700 |
| H | -16.18885600 | -1.52148400 | 0.26908100 |
| H | -14.71417100 | -3.49050400 | 0.46335300 |
| H | -12.22008500 | -3.19517000 | 0.38832600 |

## SiDT-IC

|     |              |             |             |
|-----|--------------|-------------|-------------|
| 0 1 |              |             |             |
| C   | -0.47726400  | 1.33102100  | -0.00018700 |
| C   | -1.36881400  | 0.22524300  | -0.00012100 |
| C   | -0.89006900  | -1.09257200 | -0.00002600 |
| C   | 0.47705900   | -1.33076000 | 0.00000800  |
| C   | 1.36861100   | -0.22498200 | -0.00005400 |
| C   | 0.88986600   | 1.09283200  | -0.00015400 |
| Si  | 1.46006600   | -2.95395300 | 0.00014600  |
| C   | 3.07409700   | -1.98785600 | 0.00010000  |
| C   | 2.76845500   | -0.62311300 | -0.00000100 |
| Si  | -1.46027200  | 2.95421300  | -0.00030000 |
| C   | -3.07430400  | 1.98811700  | -0.00023100 |
| C   | -2.76865700  | 0.62337400  | -0.00014900 |
| C   | -1.19524900  | 3.97094600  | -1.55374700 |
| C   | 1.19500700   | -3.97067100 | 1.55359700  |
| C   | 1.19507100   | -3.97092600 | -1.55315000 |
| C   | -1.19524100  | 3.97116800  | 1.55300100  |
| C   | 4.45482900   | -2.18386200 | 0.00013500  |
| C   | 5.21362900   | -1.00321100 | 0.00006800  |
| S   | 4.15195300   | 0.39535200  | -0.00004200 |
| C   | -4.45503600  | 2.18412500  | -0.00022700 |
| C   | -5.21382300  | 1.00346500  | -0.00014800 |
| S   | -4.15214900  | -0.39509600 | -0.00008300 |
| C   | 6.62777500   | -1.06784800 | 0.00008100  |
| C   | -6.62796700  | 1.06801400  | -0.00008200 |
| C   | 7.62876500   | -0.12449700 | 0.00003700  |
| C   | -7.62879500  | 0.12450600  | 0.00000100  |
| C   | -9.06497500  | 0.38134100  | 0.00010000  |
| C   | -9.74903400  | -0.93151300 | -0.00003000 |
| C   | -8.78025700  | -1.94599600 | -0.00011700 |
| C   | -7.43562600  | -1.33904800 | -0.00008100 |
| C   | 9.06491200   | -0.38157500 | 0.00005200  |
| C   | 9.74920400   | 0.93114200  | 0.00006800  |
| C   | 8.78062800   | 1.94580600  | 0.00003300  |
| C   | 7.43588500   | 1.33910100  | 0.00000300  |
| C   | 11.10012400  | 1.28192300  | 0.00010700  |
| C   | 11.43524200  | 2.63588500  | 0.00010800  |
| C   | 10.45806400  | 3.63386100  | 0.00006900  |
| C   | 9.10804100   | 3.29106000  | 0.00003200  |
| C   | -11.09988300 | -1.28258500 | -0.00006800 |
| C   | -11.43472300 | -2.63661600 | -0.00018400 |
| C   | -10.45734600 | -3.63439600 | -0.00025900 |
| C   | -9.10739700  | -3.29131700 | -0.00022700 |
| O   | -6.37631700  | -1.94811200 | -0.00012800 |
| C   | -9.71509000  | 1.59975000  | 0.00033600  |
| O   | 6.37670800   | 1.94839100  | -0.00003600 |
| C   | 9.71495500   | -1.60002100 | 0.00003300  |
| C   | -11.13296300 | 1.73616300  | 0.00042900  |
| N   | -12.28356300 | 1.90979800  | 0.00051300  |
| C   | -9.05919000  | 2.86401200  | 0.00054800  |
| N   | -8.57280200  | 3.92156300  | 0.00072900  |
| C   | 11.13283100  | -1.73640000 | 0.00004800  |
| N   | 12.28347000  | -1.90977700 | 0.00006600  |
| C   | 9.05907700   | -2.86429400 | -0.00001600 |
| N   | 8.57288700   | -3.92193600 | -0.00007000 |
| H   | -1.59359400  | -1.92272500 | 0.00002400  |
| H   | 1.59339000   | 1.92298600  | -0.00020200 |
| H   | -1.89043300  | 4.81614700  | -1.58286200 |
| H   | -0.17720900  | 4.37268000  | -1.58271500 |
| H   | -1.35122500  | 3.36764200  | -2.45236300 |
| H   | 1.89017200   | -4.81588700 | 1.58272500  |
| H   | 0.17695800   | -4.37238300 | 1.58255600  |
| H   | 1.35098600   | -3.36736600 | 2.45221100  |
| H   | 1.35104200   | -3.36775700 | -2.45185600 |
| H   | 1.89027200   | -4.81611700 | -1.58213000 |
| H   | 0.17703900   | -4.37268500 | -1.58206400 |
| H   | -0.17719100  | 4.37287900  | 1.58192100  |
| H   | -1.89040300  | 4.81639200  | 1.58198400  |
| H   | -1.35124300  | 3.36800000  | 2.45170400  |
| H   | 4.94197000   | -3.15428300 | 0.00020500  |

|   |              |             |             |
|---|--------------|-------------|-------------|
| H | -4.94218100  | 3.15454500  | -0.00026700 |
| H | 6.95175600   | -2.10412400 | 0.00014100  |
| H | -6.95208000  | 2.10425500  | -0.00010600 |
| H | 11.88908800  | 0.54156200  | 0.00013800  |
| H | 12.48396500  | 2.91644500  | 0.00013900  |
| H | 10.75560300  | 4.67781300  | 0.00007000  |
| H | 8.32463200   | 4.04238900  | 0.00000200  |
| H | -11.88900700 | -0.54240500 | -0.00001600 |
| H | -12.48338900 | -2.91738900 | -0.00021800 |
| H | -10.75467300 | -4.67840800 | -0.00034600 |
| H | -8.32383500  | -4.04248700 | -0.00028800 |

## IDIDT-C8

|     |              |             |             |
|-----|--------------|-------------|-------------|
| 0 1 |              |             |             |
| C   | -4.18491500  | -1.71369200 | -0.02138900 |
| C   | -2.83441500  | -1.45841900 | 0.08234400  |
| C   | -2.38077300  | -0.19284500 | 0.51190400  |
| C   | -3.28832300  | 0.81534600  | 0.83751900  |
| C   | -4.64535300  | 0.54887700  | 0.73260300  |
| C   | -5.11775200  | -0.70645100 | 0.30599600  |
| C   | -1.66816300  | -2.39817600 | -0.21453900 |
| C   | -0.48079400  | -1.49101300 | 0.08649000  |
| C   | -0.94284000  | -0.25230000 | 0.50653200  |
| C   | 0.93697100   | -1.53580800 | 0.07946800  |
| C   | 1.48065100   | -0.33181900 | 0.50278000  |
| S   | 0.30754700   | 0.86883400  | 0.90480000  |
| C   | 2.06162600   | -2.50418300 | -0.26782200 |
| C   | 3.28767200   | -1.65719200 | 0.06543100  |
| C   | 2.91942900   | -0.36876900 | 0.50900800  |
| C   | 4.61790200   | -2.00403000 | -0.03543400 |
| C   | 5.61483000   | -1.06789100 | 0.31289700  |
| C   | 5.22818100   | 0.21140800  | 0.75281200  |
| C   | 3.89211100   | 0.57050800  | 0.85177600  |
| C   | -1.72800200  | -3.60996000 | 0.72885200  |
| C   | -1.71128200  | -2.86155800 | -1.67726000 |
| C   | 2.07389200   | -2.86527600 | -1.76190100 |
| C   | 2.04320800   | -3.77784300 | 0.58812900  |
| C   | -6.54384400  | -0.97800900 | 0.20187400  |
| C   | 7.01852700   | -1.43797900 | 0.21811600  |
| S   | -7.69676600  | 0.30608100  | 0.07335800  |
| C   | -9.03480400  | -0.81828700 | 0.01663700  |
| C   | -8.54952100  | -2.12928300 | 0.08456900  |
| C   | -7.16477700  | -2.22259800 | 0.18650700  |
| C   | 7.56578300   | -2.71437200 | 0.20641800  |
| C   | 8.95720600   | -2.71531200 | 0.08641900  |
| C   | 9.51929300   | -1.44161200 | 0.03356500  |
| S   | 8.25942600   | -0.23977600 | 0.08663400  |
| C   | -10.42559600 | -0.57711900 | -0.08576600 |
| C   | 10.89729600  | -1.19967900 | -0.19504300 |
| C   | -11.19403300 | 0.56144400  | -0.16062600 |
| C   | -12.64799600 | 0.62395500  | -0.25759300 |
| C   | -13.02792800 | 2.05449200  | -0.29083200 |
| C   | -11.86293400 | 2.83319000  | -0.22746700 |
| C   | -10.68581800 | 1.94709600  | -0.14775300 |
| C   | 11.67218000  | -0.07124700 | -0.24043700 |
| C   | 12.93851000  | -0.13984400 | -1.02789400 |
| C   | 13.31762000  | 1.26405400  | -1.30278500 |
| C   | 12.42772900  | 2.12563400  | -0.63789100 |
| C   | 11.49982500  | 1.30760700  | 0.17112900  |
| O   | 13.50538500  | -1.14599200 | -1.41320000 |
| O   | -9.52075900  | 2.30998200  | -0.08391500 |
| C   | 10.80862600  | 1.74960800  | 1.28024500  |
| C   | -13.54660100 | -0.42340000 | -0.31508600 |
| C   | -14.26723100 | 2.69161600  | -0.36864500 |
| C   | -14.29812200 | 4.08608000  | -0.38100000 |
| C   | -13.12840500 | 4.84667600  | -0.31838900 |
| C   | -11.88815100 | 4.21742900  | -0.24029800 |
| C   | 14.34961400  | 1.73970700  | -2.09472800 |
| C   | 14.48161500  | 3.11945700  | -2.23865800 |
| C   | 13.59180900  | 3.98441900  | -1.59696200 |
| C   | 12.56294200  | 3.50484000  | -0.78599100 |
| C   | 10.27373800  | 0.85404900  | 2.24891000  |
| N   | 9.87884000   | 0.14948400  | 3.08614200  |
| C   | 10.71083000  | 3.12418700  | 1.63856800  |
| N   | 10.59858200  | 4.23936500  | 1.95060000  |

|   |              |             |             |
|---|--------------|-------------|-------------|
| C | -14.95687400 | -0.24757400 | -0.41074700 |
| N | -16.11500500 | -0.16580300 | -0.48925200 |
| C | -13.18284100 | -1.80012300 | -0.29016400 |
| N | -12.93928500 | -2.93830200 | -0.27378400 |
| H | -4.53574900  | -2.67847000 | -0.37631500 |
| H | -2.94759000  | 1.78937800  | 1.17499700  |
| H | -5.35644400  | 1.32258800  | 1.00779600  |
| H | 4.90447100   | -2.98589800 | -0.40182100 |
| H | 5.98927300   | 0.92837000  | 1.04767200  |
| H | 3.61761500   | 1.56092200  | 1.20152100  |
| H | -0.89589700  | -4.29215500 | 0.53931900  |
| H | -1.68913900  | -3.29725700 | 1.77573700  |
| H | -2.65720400  | -4.16588700 | 0.56936100  |
| H | -0.89295500  | -3.55474300 | -1.88843600 |
| H | -2.64919800  | -3.38788700 | -1.87995800 |
| H | -1.63653000  | -2.01451600 | -2.36434900 |
| H | 1.19730000   | -3.46162000 | -2.02634700 |
| H | 2.08199300   | -1.96656000 | -2.38445900 |
| H | 2.96356000   | -3.45676700 | -1.99950900 |
| H | 1.17825600   | -4.39925400 | 0.34270300  |
| H | 2.94171100   | -4.37289100 | 0.39757800  |
| H | 2.00867500   | -3.53829400 | 1.65422600  |
| H | -9.21788800  | -2.98395400 | 0.07084000  |
| H | -6.62884300  | -3.15936500 | 0.27907100  |
| H | 6.96901500   | -3.61287500 | 0.30376800  |
| H | 9.56564300   | -3.61248200 | 0.05093700  |
| H | -10.96663300 | -1.51822800 | -0.10464400 |
| H | 11.44163100  | -2.08977200 | -0.51723400 |
| H | -15.19733500 | 2.14113800  | -0.41843300 |
| H | -15.25844200 | 4.58880200  | -0.44093800 |
| H | -13.19024500 | 5.93036900  | -0.33039400 |
| H | -10.96104200 | 4.77974000  | -0.18982300 |
| H | 15.02579200  | 1.04626200  | -2.58481800 |
| H | 15.27609000  | 3.52799200  | -2.85527300 |
| H | 13.70100600  | 5.05627900  | -1.73004700 |
| H | 11.88767300  | 4.20158000  | -0.30481000 |

## IDT-BOC6

|     |             |             |             |
|-----|-------------|-------------|-------------|
| 0 1 |             |             |             |
| C   | 1.31905400  | 0.40432100  | -0.01575300 |
| C   | 0.99366000  | -0.97305400 | -0.00191800 |
| C   | -0.32739900 | -1.38512800 | -0.00803700 |
| C   | -1.31851200 | -0.39878600 | -0.02117500 |
| C   | -0.99291500 | 0.97842400  | -0.03583900 |
| C   | 0.32802300  | 1.39070000  | -0.02826400 |
| C   | -2.76023100 | -0.48373800 | -0.00810300 |
| C   | -3.32835000 | 0.77192500  | 0.00080800  |
| C   | -2.25752700 | 1.85113100  | -0.03456100 |
| C   | 2.76077000  | 0.48956700  | -0.01580100 |
| C   | 3.32919800  | -0.76580000 | -0.02068000 |
| C   | 2.25884500  | -1.84543500 | -0.00514200 |
| S   | -3.93107900 | -1.73326700 | -0.04745800 |
| C   | -5.23806400 | -0.55555100 | -0.01485100 |
| C   | -4.73059000 | 0.73721200  | -0.00683000 |
| S   | 3.93140400  | 1.73957100  | -0.04479400 |
| C   | 5.23853800  | 0.56192900  | -0.02832300 |
| C   | 4.73143500  | -0.73095400 | -0.02313800 |
| C   | -1.50639700 | 4.74295200  | 2.36194300  |
| C   | -1.59670800 | 3.97364000  | 1.20763300  |
| C   | -2.24158400 | 2.73219700  | 1.21924500  |
| C   | -2.78642600 | 2.28919500  | 2.42577600  |
| C   | -2.69529800 | 3.06392000  | 3.57875300  |
| C   | -2.05742700 | 4.30597800  | 3.57024700  |
| C   | -1.97585000 | 3.08816500  | -3.66388700 |
| C   | -1.72655200 | 2.38392800  | -2.48782900 |
| C   | -2.43763600 | 2.66575300  | -1.32142500 |
| C   | -3.41200500 | 3.66993300  | -1.37376100 |
| C   | -3.65813400 | 4.36805100  | -2.54881800 |
| C   | -2.94139800 | 4.09363400  | -3.71865300 |
| C   | 2.82883400  | -2.26457900 | -2.46137900 |
| C   | 2.74626500  | -3.02596600 | -3.62399400 |
| C   | 2.08530200  | -4.25557800 | -3.64135100 |
| C   | 1.50226600  | -4.69479000 | -2.44884800 |
| C   | 1.58417300  | -3.93936200 | -1.28503000 |
| C   | 2.25169300  | -2.70976100 | -1.27093600 |
| C   | 3.39109900  | -3.69696500 | 1.30863100  |



|   |              |             |             |
|---|--------------|-------------|-------------|
| C | 3.62997000   | -4.41237900 | 2.47517700  |
| C | 2.92030900   | -4.14153900 | 3.64996100  |
| C | 1.96996200   | -3.12060200 | 3.60996600  |
| C | 1.72786700   | -2.39955800 | 2.44283300  |
| C | 2.43119600   | -2.67862300 | 1.27076100  |
| C | 2.02592900   | -5.09241300 | -4.88806000 |
| C | 3.15799600   | -4.94067200 | 4.90016200  |
| C | -1.98822500  | 5.15706200  | 4.80680900  |
| C | -3.19113500  | 4.87197000  | -4.97948500 |
| C | 6.64582400   | 0.92503400  | 0.01955700  |
| C | -6.64487500  | -0.91869000 | 0.04293400  |
| C | 7.12104000   | 2.22780100  | -0.28906200 |
| C | 8.47386300   | 2.49932100  | -0.25000200 |
| C | 9.43467200   | 1.50932700  | 0.05132200  |
| C | 8.95644400   | 0.22287500  | 0.40822800  |
| C | 7.59237700   | -0.04090300 | 0.38994200  |
| C | -7.12162000  | -2.22284200 | -0.25742000 |
| C | -8.47344500  | -2.49660600 | -0.20208500 |
| C | -9.43271700  | -1.50748900 | 0.10705700  |
| C | -8.95283200  | -0.21834500 | 0.45182100  |
| C | -7.58947600  | 0.04740100  | 0.41823900  |
| O | 6.17671500   | 3.14284900  | -0.60425800 |
| O | 9.87905300   | -0.66696000 | 0.81052300  |
| O | -9.87246800  | 0.67201000  | 0.86002700  |
| O | -6.17930000  | -3.13730300 | -0.57958200 |
| C | 6.58411800   | 4.46288700  | -0.90902700 |
| C | 9.45629500   | -1.96087200 | 1.20666000  |
| C | -6.58815500  | -4.45690800 | -0.88432500 |
| C | -9.44835800  | 1.97026500  | 1.23966600  |
| C | 10.80425800  | 1.92796600  | 0.09076200  |
| C | -10.80051600 | -1.92944800 | 0.16821500  |
| C | 12.03059200  | 1.31884800  | 0.08053200  |
| C | -12.02861100 | -1.32379800 | 0.17623500  |
| C | 13.18435600  | 2.15315500  | 0.54760500  |
| C | 14.31094200  | 1.22076300  | 0.75498200  |
| C | 13.92924900  | -0.06353600 | 0.33460200  |
| C | 12.56286300  | 0.00558900  | -0.22966500 |
| C | -13.17175600 | -2.15952200 | 0.66633900  |
| C | -14.29708600 | -1.22938000 | 0.89012700  |
| C | -13.92643600 | 0.05429800  | 0.45815700  |
| C | -12.57013400 | -0.01336100 | -0.13009800 |
| C | 15.56186100  | 1.48482200  | 1.28851500  |
| C | 16.45421600  | 0.42324200  | 1.42031600  |
| C | 16.08069000  | -0.86252000 | 1.02190800  |
| C | 14.82538300  | -1.12291600 | 0.47151000  |
| C | -15.53742000 | -1.49454800 | 1.44730600  |
| C | -16.42991800 | -0.43467800 | 1.59147200  |
| C | -16.06695000 | 0.85054900  | 1.18171600  |
| C | -14.82254100 | 1.11198600  | 0.60757300  |
| O | 13.17762000  | 3.35305600  | 0.75507400  |
| C | 12.01444800  | -0.92757900 | -1.08169600 |
| O | -13.15799800 | -3.35857200 | 0.87844700  |
| C | -12.03991600 | 0.91723200  | -0.99624200 |
| C | 10.83687400  | -0.67975400 | -1.84016200 |
| N | 9.90488200   | -0.49473900 | -2.51147000 |
| C | 12.63136800  | -2.17719400 | -1.37431700 |
| N | 13.09533300  | -3.21386800 | -1.62781300 |
| C | -10.87409000 | 0.66945900  | -1.77269100 |
| N | -9.95247100  | 0.48368800  | -2.45793900 |
| C | -12.66674300 | 2.16285900  | -1.28486600 |
| N | -13.13935800 | 3.19625000  | -1.53576800 |
| H | -0.58836500  | -2.43941000 | -0.00446800 |
| H | 0.58856600   | 2.44515300  | -0.03063600 |
| H | -5.36019100  | 1.61840900  | -0.03159000 |
| H | 5.36096300   | -1.61232300 | -0.04363900 |
| H | -0.99881700  | 5.70404600  | 2.32247900  |
| H | -1.16908500  | 4.34916900  | 0.28223500  |
| H | -3.28621700  | 1.32585500  | 2.46850800  |
| H | -3.12986300  | 2.69299000  | 4.50415200  |
| H | -1.40532700  | 2.84623400  | -4.55751500 |
| H | -0.97033500  | 1.60531800  | -2.48587300 |
| H | -3.97937200  | 3.91426600  | -0.47972700 |
| H | -4.42236600  | 5.14184200  | -2.55886800 |
| H | 3.34898900   | -1.31158000 | -2.48491500 |
| H | 3.20747200   | -2.65423100 | -4.53595400 |
| H | 0.97644400   | -5.64665700 | -2.42968300 |
| H | 1.13190400   | -4.31716000 | -0.37224100 |
| H | 3.95165900   | -3.93896000 | 0.40973700  |
| H | 4.38134000   | -5.19883100 | 2.47355900  |
| H | 1.40524500   | -2.88107900 | 4.50798500  |

|   |              |             |             |
|---|--------------|-------------|-------------|
| H | 0.98312700   | -1.60989600 | 2.45139000  |
| H | 2.14155500   | -4.47951100 | -5.78601700 |
| H | 2.82659200   | -5.84156300 | -4.89791700 |
| H | 1.07733200   | -5.63215000 | -4.96195100 |
| H | 4.21709000   | -5.18670100 | 5.02159700  |
| H | 2.82934700   | -4.39713600 | 5.78997700  |
| H | 2.60751600   | -5.88857900 | 4.87267400  |
| H | -2.08959700  | 4.55377800  | 5.71298000  |
| H | -1.04176000  | 5.70265800  | 4.86339200  |
| H | -2.79229900  | 5.90254100  | 4.81771500  |
| H | -4.25891400  | 5.05924300  | -5.12749900 |
| H | -2.69370500  | 5.84852000  | -4.94545700 |
| H | -2.81307800  | 4.34134100  | -5.85725400 |
| H | 8.83326800   | 3.49436300  | -0.48578300 |
| H | 7.24036500   | -1.01579500 | 0.69813500  |
| H | -8.83353800  | -3.49327700 | -0.42985000 |
| H | -7.23620000  | 1.02455400  | 0.71771100  |
| H | 5.67016200   | 5.01523700  | -1.12592400 |
| H | 7.09756300   | 4.92775400  | -0.05947300 |
| H | 7.23820700   | 4.48218600  | -1.78824100 |
| H | 10.36539700  | -2.50240800 | 1.46682700  |
| H | 8.79827400   | -1.91115700 | 2.08102000  |
| H | 8.94549400   | -2.47919000 | 0.38787000  |
| H | -5.67577100  | -5.00730200 | -1.11243300 |
| H | -7.09228500  | -4.92522600 | -0.03105200 |
| H | -7.25115700  | -4.47391300 | -1.75681000 |
| H | -10.35574500 | 2.51235000  | 1.50464100  |
| H | -8.78107300  | 1.93011300  | 2.10751600  |
| H | -8.94740000  | 2.48201800  | 0.41075900  |
| H | 10.91596800  | 3.00693400  | 0.22321200  |
| H | -10.90725200 | -3.00826700 | 0.30592400  |
| H | 15.82297800  | 2.49363000  | 1.59273700  |
| H | 17.44216600  | 0.59070500  | 1.83775900  |
| H | 16.78225200  | -1.68238400 | 1.14188100  |
| H | 14.56947000  | -2.13300300 | 0.17699500  |
| H | -15.79038900 | -2.50283900 | 1.76001100  |
| H | -17.40968400 | -0.60304600 | 2.02743800  |
| H | -16.76826700 | 1.66912200  | 1.31152600  |
| H | -14.57448200 | 2.12156100  | 0.30469500  |

## ATT-1

|    |             |             |             |
|----|-------------|-------------|-------------|
| 01 |             |             |             |
| C  | 1.29595600  | -0.46342200 | 0.27274300  |
| C  | 1.03799300  | 0.92916700  | 0.28216500  |
| C  | -0.26075800 | 1.40393500  | 0.26982100  |
| C  | -1.29591100 | 0.46343500  | 0.27270000  |
| C  | -1.03794900 | -0.92915700 | 0.28177300  |
| C  | 0.26080400  | -1.40392200 | 0.26946400  |
| C  | -2.72890700 | 0.61337400  | 0.25067100  |
| C  | -3.36054200 | -0.61440800 | 0.23090100  |
| C  | -2.34102900 | -1.74172400 | 0.27164400  |
| C  | 2.72895500  | -0.61335800 | 0.25086400  |
| C  | 3.36059300  | 0.61442800  | 0.23151800  |
| C  | 2.34108000  | 1.74173500  | 0.27244300  |
| C  | -2.35985300 | -2.62405500 | -0.98127300 |
| C  | -2.56755700 | -2.54404800 | 1.55982100  |
| C  | 2.36008700  | 2.62441400  | -0.98022700 |
| C  | 2.56740900  | 2.54370000  | 1.56088100  |
| C  | 1.78945800  | 3.90058500  | -0.95665500 |
| C  | 1.72552900  | 4.67518500  | -2.10996400 |
| C  | 2.23042500  | 4.20821500  | -3.32646600 |
| C  | 2.79435900  | 2.93022900  | -3.34591900 |
| C  | 2.85817700  | 2.15020600  | -2.19560400 |
| C  | 1.83777600  | 2.30808800  | 2.72598000  |
| C  | 2.12578100  | 3.00009600  | 3.90067500  |
| C  | 3.14930200  | 3.94655800  | 3.95437100  |
| C  | 3.88429800  | 4.17381000  | 2.78549400  |
| C  | 3.60046700  | 3.48765500  | 1.61204700  |
| C  | -1.78926500 | -3.90024200 | -0.95795500 |
| C  | -1.72516500 | -4.67452900 | -2.11147200 |
| C  | -2.22984100 | -4.20721400 | -3.32792400 |
| C  | -2.79373800 | -2.92920000 | -3.34712200 |
| C  | -2.85772600 | -2.14949500 | -2.19660900 |
| C  | -1.83807800 | -2.30885700 | 2.72507000  |
| C  | -2.12633000 | -3.00120200 | 3.89953900  |
| C  | -3.14994700 | -3.94754400 | 3.95281700  |
| C  | -3.88475800 | -4.17444500 | 2.78372300  |

|   |              |             |             |
|---|--------------|-------------|-------------|
| C | -3.60069600  | -3.48797800 | 1.61054700  |
| C | -2.19391600  | -5.05995900 | -4.56449300 |
| C | -3.44188200  | -4.71552200 | 5.21073700  |
| C | 3.44059600   | 4.71441800  | 5.21251100  |
| S | 3.83875200   | -1.91906500 | 0.24832100  |
| C | 5.19530800   | -0.80384500 | 0.22995200  |
| C | 4.75822900   | 0.51575900  | 0.22413700  |
| S | -3.83870600  | 1.91907700  | 0.24837300  |
| C | -5.19526200  | 0.80386600  | 0.22953800  |
| C | -4.75817400  | -0.51573700 | 0.22339100  |
| C | 2.19466400   | 5.06134200  | -4.56277600 |
| C | -6.54775400  | 1.27167300  | 0.20023700  |
| C | 6.54780200   | -1.27165100 | 0.20058600  |
| C | -7.06130900  | 2.55188700  | 0.45376700  |
| C | -8.47359500  | 2.58992700  | 0.32463400  |
| C | -9.07864900  | 1.37838600  | -0.01941200 |
| S | -7.82146200  | 0.16881500  | -0.20066900 |
| C | 7.06137500   | -2.55184800 | 0.45414200  |
| C | 8.47365000   | -2.58989400 | 0.32490200  |
| C | 9.07867500   | -1.37837000 | -0.01925300 |
| S | 7.82147000   | -0.16881300 | -0.20048900 |
| C | -6.52218800  | 3.81947200  | 0.83506800  |
| C | -7.49642200  | 4.76076300  | 0.97133900  |
| S | -9.11619400  | 4.16639700  | 0.65387300  |
| C | 6.52227800   | -3.81940800 | 0.83555700  |
| C | 7.49652000   | -4.76069400 | 0.97179900  |
| S | 9.11626900   | -4.16635000 | 0.65417500  |
| C | -10.47689500 | 1.23495700  | -0.18343200 |
| C | 10.47690900  | -1.23495200 | -0.18340000 |
| C | -11.28206400 | 0.17820100  | -0.50407700 |
| C | 11.28205500  | -0.17822200 | -0.50418700 |
| C | -10.89895600 | -1.19211000 | -0.78490200 |
| N | -12.03537000 | -1.97942900 | -1.05557000 |
| C | -13.22332100 | -1.32806200 | -1.03012200 |
| S | -13.02828700 | 0.35822000  | -0.62624800 |
| C | 10.89892800  | 1.19206800  | -0.78508900 |
| N | 12.03531900  | 1.97935700  | -1.05594000 |
| C | 13.22327000  | 1.32798800  | -1.03053700 |
| S | 13.02826700  | -0.35825700 | -0.62649300 |
| O | 9.77229800   | 1.66078300  | -0.79667200 |
| O | -9.77232500  | -1.66082300 | -0.79655200 |
| C | -14.49778600 | -1.82897800 | -1.27269500 |
| C | 14.49771500  | 1.82888400  | -1.27325100 |
| C | -11.83228400 | -3.39489200 | -1.37783000 |
| C | -11.72144000 | -3.63888900 | -2.87340500 |
| C | 11.83221100  | 3.39478500  | -1.37834000 |
| C | 11.72121900  | 3.63861700  | -2.87393200 |
| C | -7.36430800  | 6.17474800  | 1.34670100  |
| O | -8.30894900  | 6.93274200  | 1.43994600  |
| O | -6.09335600  | 6.51650600  | 1.56913300  |
| C | -5.88628400  | 7.88244100  | 1.94206100  |
| C | 7.36443300   | -6.17465900 | 1.34724600  |
| O | 8.30907900   | -6.93265200 | 1.44045500  |
| O | 6.09349800   | -6.51640100 | 1.56980200  |
| C | 5.88645300   | -7.88231500 | 1.94282100  |
| C | -14.81685100 | -3.16273100 | -1.62834700 |
| N | -15.13958500 | -4.24122000 | -1.92769300 |
| C | -15.59597200 | -0.93477000 | -1.17059600 |
| N | -16.48772800 | -0.19096100 | -1.08356700 |
| C | 14.81675500  | 3.16261700  | -1.62900200 |
| N | 15.13944700  | 4.24107900  | -1.92849000 |
| C | 15.59590900  | 0.93468400  | -1.17117200 |
| N | 16.48767500  | 0.19088900  | -1.08413000 |
| H | -0.46955000  | 2.46939800  | 0.25269200  |
| H | 0.46959800   | -2.46938000 | 0.25205300  |
| H | 1.40022700   | 4.30022000  | -0.02448100 |
| H | 1.27635900   | 5.66438900  | -2.06193800 |
| H | 3.19185400   | 2.53556400  | -4.27799200 |
| H | 3.29906200   | 1.15901500  | -2.24913600 |
| H | 1.03503400   | 1.57743900  | 2.72500000  |
| H | 1.53901100   | 2.79658400  | 4.79331500  |
| H | 4.69255800   | 4.90129700  | 2.79469800  |
| H | 4.18385200   | 3.69574000  | 0.71919500  |
| H | -1.40020500  | -4.30014400 | -0.02582400 |
| H | -1.27603600  | -5.66376100 | -2.06364600 |
| H | -3.19106200  | -2.53426300 | -4.27915300 |
| H | -3.29857200  | -1.15827600 | -2.24994000 |
| H | -1.03524700  | -1.57830500 | 2.72442900  |
| H | -1.53964600  | -2.79803900 | 4.79231400  |
| H | -4.69303400  | -4.90192100 | 2.79256600  |

|   |              |             |             |
|---|--------------|-------------|-------------|
| H | -4.18391500  | -3.69578900 | 0.71752300  |
| H | -1.35475300  | -5.76067800 | -4.54228600 |
| H | -3.11129000  | -5.65303200 | -4.65943400 |
| H | -2.10739900  | -4.44972100 | -5.46784000 |
| H | -3.00190100  | -5.71892000 | 5.17025600  |
| H | -3.03170800  | -4.21220800 | 6.09010100  |
| H | -4.51834800  | -4.84199300 | 5.35983600  |
| H | 3.03584800   | 4.20757300  | 6.09237600  |
| H | 4.51672400   | 4.84690300  | 5.35861400  |
| H | 2.99461000   | 5.71528100  | 5.17475600  |
| H | 5.44008800   | 1.35897000  | 0.23361400  |
| H | -5.44002400  | -1.35896000 | 0.23253800  |
| H | 3.11102400   | 5.65622900  | -4.65615000 |
| H | 2.11060100   | 4.45128200  | -5.46646800 |
| H | 1.35413700   | 5.76046500  | -4.54151500 |
| H | -5.47771600  | 4.04174100  | 1.01105900  |
| H | 5.47781800   | -4.04164900 | 1.01165600  |
| H | -11.00371200 | 2.17384200  | -0.01419800 |
| H | 11.00373800  | -2.17382800 | -0.01415100 |
| H | -10.90237300 | -3.66750500 | -0.87545800 |
| H | -12.64062100 | -3.97052300 | -0.92711200 |
| H | -11.54730500 | -4.70330600 | -3.05183500 |
| H | -12.63557800 | -3.35460500 | -3.40016900 |
| H | -10.88211200 | -3.07846300 | -3.29300500 |
| H | 10.90235000  | 3.66745600  | -0.87590900 |
| H | 12.64059400  | 3.97046400  | -0.92776200 |
| H | 11.54708000  | 4.70301700  | -3.05246300 |
| H | 12.63529800  | 3.35426300  | -3.40076000 |
| H | 10.88184000  | 3.07815700  | -3.29338500 |
| H | -4.81216300  | 7.98785300  | 2.08434100  |
| H | -6.23513400  | 8.55101100  | 1.15212600  |
| H | -6.41918800  | 8.11036800  | 2.86767700  |
| H | 4.81235400   | -7.98769200 | 2.08529200  |
| H | 6.23514400   | -8.55092600 | 1.15285000  |
| H | 6.41951300   | -8.11022300 | 2.86835200  |

## DC-IDT2T

|     |             |             |             |
|-----|-------------|-------------|-------------|
| 0 1 |             |             |             |
| C   | 1.28809700  | 0.48474300  | 0.00952000  |
| C   | 1.05284800  | -0.91126900 | 0.04064300  |
| C   | 0.23798700  | 1.40750600  | -0.02671300 |
| C   | -1.05283500 | 0.91128700  | -0.04030600 |
| C   | -1.28808300 | -0.48472500 | -0.00919700 |
| C   | -0.23797200 | -1.40748900 | 0.02703600  |
| C   | -2.36947600 | 1.70177900  | -0.06445200 |
| C   | -3.37047400 | 0.55830300  | -0.02570100 |
| C   | -2.71890200 | -0.65899700 | -0.01294900 |
| C   | -4.76754000 | 0.43530100  | -0.03772700 |
| C   | -5.17881800 | -0.89006100 | -0.02759400 |
| S   | -3.80522400 | -1.98439400 | -0.01250800 |
| C   | 2.36948900  | -1.70176000 | 0.06486500  |
| C   | 3.37048800  | -0.55828400 | 0.02613400  |
| C   | 2.71891700  | 0.65901500  | 0.01331100  |
| C   | 4.76755300  | -0.43528600 | 0.03830100  |
| C   | 5.17883500  | 0.89007300  | 0.02818800  |
| S   | 3.80524300  | 1.98441300  | 0.01292600  |
| C   | 2.42253600  | -2.59978700 | -1.17594600 |
| C   | 2.58674800  | -2.48414300 | 1.36664200  |
| C   | -2.42246200 | 2.59977000  | 1.17638800  |
| C   | -2.58680000 | 2.48419900  | -1.36619500 |
| C   | 1.85768600  | -3.87862800 | -1.14856900 |
| C   | 1.82310100  | -4.66840800 | -2.29247500 |
| C   | 2.35325400  | -4.21494400 | -3.50348100 |
| C   | 2.91247100  | -2.93522300 | -3.52678300 |
| C   | 2.94671500  | -2.13975100 | -2.38559300 |
| C   | 3.62413600  | -3.42111100 | 1.44349200  |
| C   | 3.89784000  | -4.08849800 | 2.63031800  |
| C   | 3.14806000  | -3.84832500 | 3.78679500  |
| C   | 2.12096100  | -2.90730800 | 3.70772800  |
| C   | 1.84304800  | -2.23427500 | 2.52003800  |
| C   | -1.85767100 | 3.87863400  | 1.14900500  |
| C   | -1.82302600 | 4.66838000  | 2.29293800  |
| C   | -2.35305800 | 4.21485300  | 3.50396900  |
| C   | -2.91221800 | 2.93510500  | 3.52727600  |
| C   | -2.94652300 | 2.13967000  | 2.38606500  |
| C   | -3.62422400 | 3.42114300  | -1.44297100 |
| C   | -3.89799000 | 4.08856500  | -2.62975400 |

|   |              |             |             |
|---|--------------|-------------|-------------|
| C | -3.14824200  | 3.84845700  | -3.78627500 |
| C | -2.12111100  | 2.90748000  | -3.70727900 |
| C | -1.84313200  | 2.23440500  | -2.51962000 |
| C | 2.34834600   | -5.08458900 | -4.72878300 |
| C | 3.42652600   | -4.59726700 | 5.05921000  |
| C | -2.34808600  | 5.08444800  | 4.72930800  |
| C | -3.42683200  | 4.59741900  | -5.05864900 |
| C | 6.51530700   | 1.40788500  | 0.02785600  |
| C | -6.51528700  | -1.40787700 | -0.02712700 |
| S | -7.88252700  | -0.34218900 | 0.01901600  |
| C | -9.00041200  | -1.68971900 | -0.00716300 |
| C | -8.28731600  | -2.89480000 | -0.04855800 |
| C | -6.90657700  | -2.74535000 | -0.05969700 |
| S | 7.88252200   | 0.34221700  | -0.01946400 |
| C | 9.00043200   | 1.68970600  | 0.00770100  |
| C | 8.28736100   | 2.89476300  | 0.05019900  |
| C | 6.90662100   | 2.74532300  | 0.06146400  |
| C | -10.41322600 | -1.69931300 | 0.01255200  |
| C | 10.41324500  | 1.69928800  | -0.01220900 |
| C | -11.37374000 | -0.71322200 | 0.05112200  |
| C | 11.37373300  | 0.71320600  | -0.05161500 |
| C | -12.81773800 | -0.90638800 | 0.06871300  |
| C | -13.44325600 | 0.43568800  | 0.09187000  |
| C | -12.43039300 | 1.40626400  | 0.09645900  |
| C | -11.11469700 | 0.73840800  | 0.07381600  |
| C | 12.81773300  | 0.90635500  | -0.06921500 |
| C | 13.44322200  | -0.43571600 | -0.09337400 |
| C | 12.43033800  | -1.40626800 | -0.09856500 |
| C | 11.11465900  | -0.73840200 | -0.07535300 |
| C | -14.77689500 | 0.84571100  | 0.10876100  |
| C | -15.05187700 | 2.21330100  | 0.12989900  |
| C | -14.03161300 | 3.16677600  | 0.13494900  |
| C | -12.69795000 | 2.76450500  | 0.11805900  |
| C | 14.77685100  | -0.84575700 | -0.11062500 |
| C | 15.05180300  | -2.21333800 | -0.13270400 |
| C | 14.03151800  | -3.16678800 | -0.13834000 |
| C | 12.69786500  | -2.76450000 | -0.12110200 |
| O | -10.02792800 | 1.29818100  | 0.07310400  |
| O | 10.02787900  | -1.29815500 | -0.07498500 |
| C | 13.52172700  | 2.09535000  | -0.06986300 |
| C | -13.52170700 | -2.09539700 | 0.07014400  |
| C | 14.94382800  | 2.16921300  | -0.08869900 |
| N | 16.10104600  | 2.29146100  | -0.10345400 |
| C | 12.92163400  | 3.38670600  | -0.05552300 |
| N | 12.48111600  | 4.46422200  | -0.04499900 |
| C | -14.94380900 | -2.16927800 | 0.08883300  |
| N | -16.10102600 | -2.29154200 | 0.10351800  |
| C | -12.92158400 | -3.38675000 | 0.05681900  |
| N | -12.48103800 | -4.46426300 | 0.04713900  |
| H | 0.42989100   | 2.47620800  | -0.04201800 |
| H | -0.42987800  | -2.47619000 | 0.04235800  |
| H | -5.46412000  | 1.26624000  | -0.05784200 |
| H | 5.46412900   | -1.26622500 | 0.05858600  |
| H | 1.44975800   | -4.26778500 | -0.21995800 |
| H | 1.37722200   | -5.65897300 | -2.24160100 |
| H | 3.33021300   | -2.55136500 | -4.45453900 |
| H | 3.38569500   | -1.14786900 | -2.44170200 |
| H | 4.21966900   | -3.63813900 | 0.56084800  |
| H | 4.71016800   | -4.81089800 | 2.65974500  |
| H | 1.52365900   | -2.69279500 | 4.59076300  |
| H | 1.03814100   | -1.50637800 | 2.49931000  |
| H | -1.44983700  | 4.26784000  | 0.22037300  |
| H | -1.37719500  | 5.65896600  | 2.24205700  |
| H | -3.32986800  | 2.55120000  | 4.45505400  |
| H | -3.38545300  | 1.14776700  | 2.44217500  |
| H | -4.21972600  | 3.63812000  | -0.56029300 |
| H | -4.71033800  | 4.81094500  | -2.65912500 |
| H | -1.52382600  | 2.69302700  | -4.59034000 |
| H | -1.03819500  | 1.50653900  | -2.49895000 |
| H | 1.50134000   | -5.77624000 | -4.72415100 |
| H | 2.29732700   | -4.48642600 | -5.64282200 |
| H | 3.26171100   | -5.68865000 | -4.78561100 |
| H | 4.49925400   | -4.75839200 | 5.20063000  |
| H | 3.04353000   | -4.05987700 | 5.93077600  |
| H | 2.95009900   | -5.58473600 | 5.04671500  |
| H | -1.50133500  | 5.77640800  | 4.72444300  |
| H | -3.26165900  | 5.68816500  | 4.78645200  |
| H | -2.29656300  | 4.48626200  | 5.64330500  |
| H | -4.49965600  | 4.75750900  | -5.20054800 |
| H | -2.95141300  | 5.58536700  | -5.04569200 |

|   |              |             |             |
|---|--------------|-------------|-------------|
| H | -3.04289400  | 4.06060700  | -5.93015400 |
| H | -8.79503100  | -3.85324500 | -0.07065200 |
| H | -6.20746900  | -3.57312300 | -0.09397100 |
| H | 8.79509400   | 3.85318200  | 0.07304000  |
| H | 6.20752800   | 3.57307200  | 0.09664700  |
| H | -10.77996900 | -2.72094900 | -0.00836600 |
| H | 10.78001100  | 2.72090000  | 0.00941700  |
| H | -15.59796000 | 0.14107900  | 0.10530400  |
| H | -16.08711900 | 2.53993400  | 0.14262300  |
| H | -14.28228200 | 4.22283200  | 0.15181300  |
| H | -11.88227100 | 3.48073000  | 0.12116200  |
| H | 15.59793300  | -0.14114500 | -0.10674000 |
| H | 16.08703700  | -2.53998500 | -0.14570600 |
| H | 14.28216300  | -4.22283800 | -0.15592800 |
| H | 11.88217000  | -3.48070400 | -0.12464000 |

## BZIC

0 1

|   |              |             |             |
|---|--------------|-------------|-------------|
| C | 1.22606400   | 1.27659200  | -0.25496400 |
| C | 0.85743700   | -0.09873200 | -0.20173100 |
| C | -0.52077100  | -0.46456000 | -0.22948200 |
| C | -1.52322300  | 0.54130900  | -0.09777700 |
| C | -1.14032000  | 1.90975200  | -0.07575100 |
| C | 0.21473200   | 2.27396600  | -0.20502600 |
| N | -1.13608700  | -1.69835300 | -0.37124500 |
| C | -2.49357000  | -1.49539100 | -0.28842600 |
| C | -2.75404900  | -0.13036900 | -0.10806100 |
| C | 2.62882400   | 1.30493800  | -0.27486200 |
| C | 3.08213200   | -0.01965000 | -0.18992700 |
| N | 2.00563400   | -0.87479800 | -0.13712400 |
| N | -1.87393300  | 3.02714700  | 0.00681800  |
| N | -0.96437300  | 3.98378000  | -0.06675800 |
| N | 0.29706400   | 3.61072500  | -0.19892500 |
| C | -1.34070700  | 5.37966200  | -0.07679200 |
| C | -0.57884000  | -2.92833400 | -0.90370900 |
| C | 2.14184800   | -2.22438900 | 0.38575400  |
| C | -3.64127700  | -2.28294400 | -0.39994100 |
| C | -4.79861900  | -1.51618100 | -0.25626400 |
| S | -4.43720200  | 0.19622800  | -0.03282100 |
| S | 3.93107800   | 2.41529000  | -0.30533200 |
| C | 5.09801300   | 1.08948300  | -0.17569900 |
| C | 4.46958600   | -0.15484200 | -0.12906400 |
| C | -6.10096100  | -2.04893300 | -0.42409300 |
| C | 6.46743400   | 1.43280000  | -0.25613500 |
| C | -7.36106400  | -1.53525100 | -0.26456600 |
| C | 7.63502200   | 0.71982300  | -0.12527700 |
| C | -8.46530300  | -2.16405600 | -1.04678000 |
| C | -9.56621800  | -1.17501800 | -1.05362900 |
| C | -9.21641900  | -0.08226400 | -0.24112600 |
| C | -7.91528200  | -0.37166800 | 0.39797700  |
| C | -10.76754700 | -1.22718300 | -1.74086900 |
| C | -11.63563100 | -0.14331000 | -1.62455800 |
| C | -11.29045800 | 0.95543200  | -0.83385200 |
| C | -10.08759200 | 0.99963500  | -0.12839800 |
| C | 8.85185400   | 1.33042500  | -0.74095400 |
| C | 9.85249900   | 0.24715300  | -0.83161700 |
| C | 9.33583100   | -0.91066200 | -0.22694800 |
| C | 8.01379400   | -0.59027900 | 0.35906600  |
| C | 11.10340600  | 0.27781100  | -1.42451100 |
| C | 11.85438000  | -0.89606000 | -1.42783400 |
| C | 11.34444400  | -2.05910700 | -0.84663300 |
| C | 10.09010600  | -2.08308300 | -0.23567500 |
| C | -7.46024400  | 0.19306100  | 1.57155600  |
| C | 7.39562000   | -1.32807500 | 1.35089900  |
| O | -8.43820400  | -3.24263400 | -1.61143300 |
| O | 8.97034800   | 2.47700200  | -1.13321600 |
| C | -6.42891700  | -0.40401800 | 2.35089300  |
| N | -5.63457700  | -0.90420500 | 3.03791400  |
| C | -8.08409600  | 1.31604900  | 2.18532900  |
| N | -8.56368800  | 2.24072600  | 2.70354300  |
| C | 6.32223300   | -0.82447800 | 2.13411800  |
| N | 5.45921800   | -0.43848700 | 2.81272200  |
| C | 7.85702200   | -2.60670600 | 1.77610300  |
| N | 8.18854400   | -3.66060200 | 2.14126500  |
| H | -2.25024800  | 5.49237800  | 0.51096800  |
| H | -0.52851500  | 5.95632900  | 0.36300300  |
| H | -1.51883900  | 5.71521900  | -1.10159900 |

|   |              |             |             |
|---|--------------|-------------|-------------|
| H | -0.34461000  | -3.64907700 | -0.11622100 |
| H | -1.30843800  | -3.37563400 | -1.58162500 |
| H | 0.31837400   | -2.70877900 | -1.48147700 |
| H | 2.99677100   | -2.24799500 | 1.06459400  |
| H | 1.25610600   | -2.48781600 | 0.96233200  |
| H | 2.29883400   | -2.95933200 | -0.40755000 |
| H | -3.67355100  | -3.35324100 | -0.56634700 |
| H | 5.00977000   | -1.09194300 | -0.10752500 |
| H | -6.10936800  | -3.03680900 | -0.88896400 |
| H | 6.66565700   | 2.45584600  | -0.58472600 |
| H | -11.01071400 | -2.09187700 | -2.35031600 |
| H | -12.58391100 | -0.14726000 | -2.15282100 |
| H | -11.97258000 | 1.79711000  | -0.76425300 |
| H | -9.84788200  | 1.86770500  | 0.47322900  |
| H | 11.47266200  | 1.19519600  | -1.87201200 |
| H | 12.83775500  | -0.91177000 | -1.88714400 |
| H | 11.93594100  | -2.96918200 | -0.86812800 |
| H | 9.72596400   | -3.00393900 | 0.20215400  |

## ITOIC

0 1

|   |              |             |             |
|---|--------------|-------------|-------------|
| C | -1.01900500  | -0.94599700 | 0.03285000  |
| C | -1.30505600  | 0.44072100  | 0.05837200  |
| C | -0.28747400  | 1.39998400  | 0.08705200  |
| C | 1.02046100   | 0.95046200  | 0.09744100  |
| C | 1.30645300   | -0.43618300 | 0.06873700  |
| C | 0.28893200   | -1.39547100 | 0.04182400  |
| C | -2.30655800  | -1.78315100 | 0.01924900  |
| C | 2.30815400   | 1.78742500  | 0.11336600  |
| C | -2.74181300  | 0.56631600  | 0.05863800  |
| C | -3.34671100  | -0.67513600 | 0.05452400  |
| C | -4.74550700  | -0.60209400 | 0.04504000  |
| C | -5.20610500  | 0.70889400  | 0.04900800  |
| S | -3.87158300  | 1.85601700  | 0.04852500  |
| C | 2.74311400   | -0.56181000 | 0.06272900  |
| C | 3.34820700   | 0.67949800  | 0.07013700  |
| C | 4.74706000   | 0.60615000  | 0.06813300  |
| C | 5.20725400   | -0.70491200 | 0.05322300  |
| S | 3.87245200   | -1.85168600 | 0.04689800  |
| C | -2.32352800  | -2.67361700 | 1.26647900  |
| C | -2.50147200  | -2.58228700 | -1.27567300 |
| C | 2.32398100   | 2.68440500  | -1.12922500 |
| C | -1.71827500  | -3.93398100 | 1.24585000  |
| C | -1.65509900  | -4.71467200 | 2.39485600  |
| C | -2.19523900  | -4.27014600 | 3.60470500  |
| C | -2.79387600  | -3.00823100 | 3.62171700  |
| C | -2.85729400  | -2.22224100 | 2.47526600  |
| C | -3.50867100  | -3.55247000 | -1.34260600 |
| C | -3.76537600  | -4.23612000 | -2.52390400 |
| C | -3.02749700  | -3.98024200 | -3.68473200 |
| C | -2.03005800  | -3.00719600 | -3.61541400 |
| C | -1.76967000  | -2.31745500 | -2.43324600 |
| C | 1.72418600   | 3.94715500  | -1.10011900 |
| C | 1.65921200   | 4.73332000  | -2.24533000 |
| C | 2.19206900   | 4.29199000  | -3.45952500 |
| C | 2.78528600   | 3.02762700  | -3.48491600 |
| C | 2.85038100   | 2.23612600  | -2.34244100 |
| C | -2.16026800  | -5.13150000 | 4.83541000  |
| C | -3.28746300  | -4.74553500 | -4.95136700 |
| C | 2.15476400   | 5.15879100  | -4.68630800 |
| C | 3.29615400   | 4.72228900  | 5.09911000  |
| C | 3.51539600   | 3.54571100  | 1.48486500  |
| C | 3.77358600   | 4.22286000  | 2.66951700  |
| C | 3.03403400   | 3.96401000  | 3.82869000  |
| C | 2.03324900   | 2.99488300  | 3.75397700  |
| C | 1.77126400   | 2.31171200  | 2.56824800  |
| C | 2.50488000   | 2.57927300  | 1.41248400  |
| C | -9.07447000  | 1.26805100  | 0.05572100  |
| C | -8.44032000  | 2.52585600  | 0.06962700  |
| C | -7.03654400  | 2.45277300  | 0.07909100  |
| C | -6.56906800  | 1.14243400  | 0.04874800  |
| S | -7.87253600  | -0.00630500 | 0.04447300  |
| C | -10.47665900 | 1.19533500  | -0.01271000 |
| C | -11.37140000 | 0.14542100  | -0.03770400 |
| C | -11.02569100 | -1.27804500 | 0.11044100  |
| C | -12.29932300 | -2.02400500 | 0.15018600  |
| C | -13.36705100 | -1.12422100 | 0.01386600  |

|   |              |             |             |
|---|--------------|-------------|-------------|
| C | -12.81797800 | 0.24323900  | -0.14113700 |
| O | -9.90766800  | -1.76624200 | 0.20140700  |
| C | -13.58126000 | 1.37070800  | -0.38153200 |
| C | -12.48678700 | -3.38674100 | 0.30366200  |
| C | -13.79448500 | -3.86772600 | 0.32621700  |
| C | -14.86830600 | -2.98498200 | 0.19658600  |
| C | -14.67373800 | -1.61212100 | 0.03802500  |
| C | 9.07485800   | -1.26823800 | 0.00518600  |
| C | 8.43963400   | -2.52506200 | 0.04252700  |
| C | 7.03623900   | -2.45000700 | 0.07103300  |
| C | 6.56983600   | -1.13942900 | 0.03593000  |
| S | 7.87427900   | 0.00753400  | -0.00108200 |
| O | 6.19894400   | -3.51873600 | 0.10923800  |
| C | 10.47559700  | -1.19808900 | -0.08973900 |
| C | 11.37084200  | -0.14969000 | -0.14385300 |
| C | 11.03023700  | 1.27573800  | -0.00270300 |
| C | 12.30575000  | 2.01962400  | 0.00668200  |
| C | 13.36914500  | 1.11663200  | -0.14191600 |
| C | 12.81479500  | -0.25087500 | -0.27566200 |
| O | 9.91488600   | 1.76684800  | 0.10389600  |
| C | 13.57082500  | -1.38122400 | -0.52528500 |
| C | 12.49861300  | 3.38331300  | 0.14434700  |
| C | 13.80738800  | 3.86186600  | 0.13784000  |
| C | 14.87698900  | 2.97587400  | -0.00394900 |
| C | 14.67694000  | 1.60204600  | -0.14655800 |
| O | -9.15632400  | 3.66348600  | 0.11423700  |
| O | -6.19976100  | 3.52239900  | 0.09531400  |
| O | 9.15522500   | -3.66266300 | 0.09043500  |
| C | -8.92280600  | 4.59447900  | -0.95274800 |
| C | -6.24418200  | 4.28564400  | 1.30788500  |
| C | 6.25074500   | -4.26213800 | 1.33404700  |
| C | 8.90299200   | -4.60911200 | -0.95839800 |
| C | -13.04567400 | 2.67129500  | -0.60444100 |
| N | -12.66496700 | 3.75349600  | -0.80277300 |
| C | -15.00264500 | 1.35535400  | -0.46198600 |
| N | -16.16334800 | 1.40111400  | -0.53586800 |
| C | 14.99025600  | -1.36915200 | -0.63514000 |
| N | 16.14908300  | -1.41752300 | -0.73293600 |
| C | 13.02803300  | -2.68158400 | -0.73151200 |
| N | 12.64126300  | -3.76374700 | -0.91796600 |
| H | -0.51739500  | 2.46129100  | 0.09852200  |
| H | 0.51900200   | -2.45672300 | 0.02877900  |
| H | -5.41128200  | -1.45821800 | 0.03393500  |
| H | 5.41323600   | 1.46195200  | 0.07941700  |
| H | -1.30134400  | -4.31632000 | 0.31839500  |
| H | -1.17873400  | -5.69122100 | 2.34887000  |
| H | -3.22023700  | -2.63144200 | 4.54848500  |
| H | -3.32754300  | -1.24450300 | 2.52564200  |
| H | -4.09391900  | -3.78215700 | -0.45627300 |
| H | -4.55483300  | -4.98375800 | -2.54558200 |
| H | -1.44270000  | -2.77999900 | -4.50196000 |
| H | -0.98816500  | -1.56432200 | -2.42015700 |
| H | 1.31262700   | 4.32688700  | -0.16920800 |
| H | 1.18677800   | 5.71145000  | -2.19295300 |
| H | 3.20556900   | 2.65301900  | -4.41531900 |
| H | 3.31563100   | 1.25637700  | -2.39972200 |
| H | -3.05604100  | -5.76057800 | 4.90036700  |
| H | -1.29422500  | -5.79920600 | 4.83125300  |
| H | -2.12202400  | -4.52638500 | 5.74551100  |
| H | -4.35627600  | -4.93086100 | -5.09315600 |
| H | -2.91479900  | -4.20706000 | -5.82671900 |
| H | -2.79006900  | -5.72246700 | -4.93019000 |
| H | 3.05158200   | 5.78636700  | -4.75154400 |
| H | 2.11220000   | 4.55765600  | -5.59883200 |
| H | 1.29001100   | 5.82810100  | -4.67635100 |
| H | 4.36619600   | 4.89612700  | 5.24626600  |
| H | 2.80913500   | 5.70444500  | 5.07906200  |
| H | 2.91416600   | 4.18469800  | 5.97097600  |
| H | 4.10199700   | 3.77762000  | 0.60004500  |
| H | 4.56557000   | 4.96768700  | 2.69521400  |
| H | 1.44441300   | 2.76560200  | 4.63904100  |
| H | 0.98691100   | 1.56161800  | 2.55079900  |
| H | -10.89591900 | 2.19769500  | -0.03977000 |
| H | -11.63076300 | -4.04679100 | 0.40343500  |
| H | -15.53408400 | -0.96275700 | -0.05742700 |
| H | 10.89330200  | -2.20122200 | -0.11311000 |
| H | 11.64584300  | 4.04594300  | 0.25438700  |
| H | 15.53415600  | 0.95009800  | -0.25214700 |
| H | -9.56492600  | 5.44921300  | -0.74458200 |
| H | -7.87555500  | 4.90400800  | -0.98518600 |



|   |              |             |             |
|---|--------------|-------------|-------------|
| H | -9.20778900  | 4.14485100  | -1.90825300 |
| H | -7.24607600  | 4.69030800  | 1.47800300  |
| H | -5.94672100  | 3.66736300  | 2.16058500  |
| H | -5.53283900  | 5.10133700  | 1.17848700  |
| H | 7.25347900   | -4.66520500 | 1.50327700  |
| H | 5.96002300   | -3.62945900 | 2.17835100  |
| H | 5.53757600   | -5.07893600 | 1.22298600  |
| H | 9.54716600   | -5.46169100 | -0.74786200 |
| H | 7.85498000   | -4.91732700 | -0.96922700 |
| H | 9.17328100   | -4.17453600 | -1.92509300 |
| H | 13.99966900  | 4.92490800  | 0.24448300  |
| H | 15.89208000  | 3.36078900  | -0.00374700 |
| H | -15.88244700 | -3.37174300 | 0.21915800  |
| H | -13.98263300 | -4.93010600 | 0.44601200  |

## IDTOT2F

|     |              |             |             |
|-----|--------------|-------------|-------------|
| 0 1 |              |             |             |
| C   | 0.34590700   | -1.34791500 | -0.20664600 |
| C   | 1.33369100   | -0.33509300 | -0.20143700 |
| C   | 0.99818300   | 1.02219400  | -0.19412400 |
| C   | -0.34594200  | 1.34800800  | -0.20669500 |
| C   | -1.33372400  | 0.33518500  | -0.20138900 |
| C   | -0.99821700  | -1.02210100 | -0.19402700 |
| C   | -0.97437600  | 2.74981800  | -0.19768100 |
| C   | -2.45066700  | 2.37854800  | -0.16259600 |
| C   | -2.60777200  | 1.00966600  | -0.19100300 |
| C   | 0.97433900   | -2.74972700 | -0.19761200 |
| C   | 2.45062700   | -2.37845500 | -0.16266700 |
| C   | 2.60774100   | -1.00957600 | -0.19112200 |
| C   | 0.69608800   | -3.53384900 | -1.48844400 |
| C   | 0.49255400   | -3.47149800 | 1.06634500  |
| C   | -0.49248600  | 3.47166400  | 1.06619700  |
| C   | -0.69623000  | 3.53388200  | -1.48856700 |
| C   | 1.00795300   | -4.89735200 | -1.55788600 |
| C   | 0.82310300   | -5.61311100 | -2.73301600 |
| C   | 0.32435800   | -4.99963100 | -3.88753600 |
| C   | 0.02640200   | -3.63905700 | -3.81779700 |
| C   | 0.20762500   | -2.91657100 | -2.64024600 |
| C   | 1.10673800   | -3.23666800 | 2.29958900  |
| C   | 0.61586100   | -3.81585200 | 3.46513300  |
| C   | -0.50998900  | -4.64358700 | 3.44514500  |
| C   | -1.13183900  | -4.86014400 | 2.21323800  |
| C   | -0.64222300  | -4.28633400 | 1.04382500  |
| C   | 0.64223600   | 4.28659800  | 1.04350100  |
| C   | 1.13196400   | 4.86046800  | 2.21281900  |
| C   | 0.51028600   | 4.64389000  | 3.44483000  |
| C   | -0.61549000  | 3.81609000  | 3.46498800  |
| C   | -1.10648700  | 3.23682900  | 2.29951200  |
| C   | -1.00829200  | 4.89735900  | -1.55805800 |
| C   | -0.82352000  | 5.61310600  | -2.73318300 |
| C   | -0.32467200  | 4.99964800  | -3.88769600 |
| C   | -0.02644100  | 3.63916000  | -3.81788200 |
| C   | -0.20759900  | 2.91666200  | -2.64030300 |
| C   | 0.10219400   | -5.78755600 | -5.14739900 |
| C   | -1.02021400  | -5.29406500 | 4.69961100  |
| C   | 1.02071700   | 5.29446300  | 4.69916300  |
| C   | -0.10309000  | 5.78754700  | -5.14768000 |
| C   | -3.68571900  | 3.06155500  | -0.16536000 |
| C   | -4.77787300  | 2.18849400  | -0.20654100 |
| S   | -4.25020600  | 0.51988300  | -0.22840600 |
| C   | 3.68566600   | -3.06148200 | -0.16546900 |
| C   | 4.77782800   | -2.18843800 | -0.20671300 |
| S   | 4.25017900   | -0.51981400 | -0.22859600 |
| C   | -6.16595600  | 2.53449700  | -0.27089300 |
| S   | -7.40663100  | 1.36648600  | 0.04435900  |
| C   | -8.67376800  | 2.52013600  | -0.28324000 |
| C   | -8.11109000  | 3.75284600  | -0.62149700 |
| C   | -6.71958100  | 3.77305700  | -0.59920500 |
| C   | 6.16590500   | -2.53446300 | -0.27112500 |
| S   | 7.40661400   | -1.36650100 | 0.04416900  |
| C   | 8.67371500   | -2.52016400 | -0.28353800 |
| C   | 8.11099800   | -3.75283600 | -0.62186100 |
| C   | 6.71948800   | -3.77301500 | -0.59953000 |
| C   | -10.05639100 | 2.24457900  | -0.36459800 |

|   |              |             |             |
|---|--------------|-------------|-------------|
| C | -10.82904600 | 1.14322600  | -0.08671600 |
| C | 10.05634300  | -2.24463100 | -0.36490900 |
| C | 10.82903200  | -1.14332700 | -0.08693600 |
| C | -12.12419400 | 1.01582500  | -0.81029600 |
| C | -12.51374300 | -0.40765400 | -0.68719500 |
| C | -11.59519100 | -1.07171300 | 0.14077400  |
| C | -10.62974300 | -0.07952400 | 0.65918300  |
| C | 12.12416900  | -1.01588900 | -0.81053200 |
| C | 12.51377600  | 0.40755800  | -0.68727300 |
| C | 11.59526900  | 1.07155500  | 0.14079500  |
| C | 10.62979500  | 0.07934300  | 0.65911400  |
| C | -13.58557800 | -1.05418000 | -1.28170900 |
| C | -13.71628400 | -2.41050100 | -1.04095100 |
| C | -12.79962000 | -3.08638600 | -0.22768700 |
| C | -11.73754000 | -2.43750400 | 0.38156800  |
| C | 13.58562000  | 1.05411100  | -1.28174100 |
| C | 13.71638500  | 2.41039900  | -1.04083000 |
| C | 12.79976700  | 3.08622500  | -0.22746600 |
| C | 11.73767600  | 2.43731400  | 0.38174200  |
| O | 3.81458100   | -4.41157400 | -0.15690100 |
| O | -3.81467600  | 4.41164400  | -0.15679200 |
| C | -4.08724900  | 4.98099700  | 1.12934200  |
| C | 4.08737500   | -4.98092900 | 1.12918400  |
| O | -12.71369000 | 1.88517700  | -1.42550900 |
| C | -9.87768200  | -0.22989000 | 1.80764900  |
| O | 12.71361000  | -1.88519000 | -1.42586900 |
| C | 9.87776600   | 0.22959900  | 1.80761500  |
| F | 14.71191400  | 3.10841000  | -1.57923500 |
| F | 12.97241400  | 4.39260600  | -0.04704400 |
| F | -14.71180000 | -3.10848800 | -1.57941200 |
| F | -12.97221400 | -4.39279400 | -0.04741100 |
| C | -9.31064200  | 0.88110800  | 2.49271500  |
| N | -8.88906700  | 1.77606300  | 3.10492300  |
| C | -9.74602500  | -1.47191700 | 2.48987400  |
| N | -9.61023400  | -2.47943000 | 3.05594500  |
| C | 9.31069700   | -0.88145600 | 2.49256200  |
| N | 8.88910400   | -1.77648400 | 3.10465100  |
| C | 9.74616800   | 1.47154700  | 2.48999600  |
| N | 9.61040800   | 2.47899000  | 3.05619800  |
| H | 1.76306700   | 1.79313200  | -0.17602100 |
| H | -1.76309800  | -1.79304000 | -0.17584900 |
| H | 1.40551900   | -5.40118600 | -0.68335600 |
| H | 1.07369200   | -6.67119200 | -2.75549900 |
| H | -0.35716000  | -3.12943000 | -4.69845700 |
| H | -0.03650500  | -1.85922500 | -2.62835000 |
| H | 1.97447500   | -2.58457000 | 2.35448300  |
| H | 1.11598100   | -3.61556900 | 4.40970400  |
| H | -2.01662300  | -5.49052700 | 2.16462800  |
| H | -1.14749200  | -4.48228100 | 0.10284000  |
| H | 1.14735600   | 4.48255700  | 0.10243800  |
| H | 2.01669700   | 5.49091500  | 2.16407300  |
| H | -1.11547600  | 3.61581300  | 4.40963000  |
| H | -1.97417000  | 2.58467100  | 2.35454600  |
| H | -1.40591800  | 5.40116100  | -0.68353800 |
| H | -1.07422800  | 6.67116000  | -2.75568100 |
| H | 0.35731900   | 3.12959700  | -4.69849000 |
| H | 0.03675400   | 1.85936900  | -2.62836400 |
| H | 0.94249600   | -6.45828100 | -5.35153600 |
| H | -0.79570000  | -6.41161800 | -5.06870300 |
| H | -0.02758400  | -5.13078300 | -6.01143800 |
| H | -0.56792000  | -6.28280200 | 4.84181500  |
| H | -0.78169100  | -4.69698000 | 5.58404200  |
| H | -2.10402700  | -5.43528900 | 4.66363900  |
| H | 0.57149900   | 6.28490300  | 4.83924000  |
| H | 0.77890700   | 4.69940900  | 5.58405800  |
| H | 2.10504900   | 5.43211000  | 4.66463800  |
| H | -0.94652300  | 6.45340200  | -5.35495100 |
| H | 0.79103700   | 6.41671200  | -5.06697700 |
| H | 0.03275300   | 5.13064300  | -6.01067800 |
| H | -8.72646000  | 4.60535000  | -0.88811400 |
| H | -6.10829900  | 4.62907900  | -0.85114300 |
| H | 8.72633800   | -4.60533700 | -0.88855500 |
| H | 6.10817600   | -4.62900800 | -0.85149400 |
| H | -10.62106600 | 3.03287700  | -0.86642700 |
| H | 10.62098500  | -3.03289200 | -0.86683200 |
| H | -14.29509300 | -0.52757000 | -1.91077200 |
| H | -11.06154800 | -3.01368400 | 1.00090600  |
| H | 14.29510000  | 0.52754700  | -1.91088200 |
| H | 11.06172200  | 3.01345000  | 1.00115900  |
| H | -3.25755200  | 4.79340800  | 1.81708400  |

|   |             |             |            |
|---|-------------|-------------|------------|
| H | -4.19475400 | 6.05402000  | 0.96741600 |
| H | -5.01550800 | 4.57932600  | 1.54841600 |
| H | 3.25774700  | -4.79343300 | 1.81703600 |
| H | 4.19496000  | -6.05393800 | 0.96722000 |
| H | 5.01564900  | -4.57918300 | 1.54815100 |

## ITOC-F

|     |              |             |             |
|-----|--------------|-------------|-------------|
| 0 1 |              |             |             |
| C   | -1.04164900  | -0.92187300 | -0.01396600 |
| C   | -1.29433000  | 0.47108700  | 0.02222100  |
| C   | -0.25424900  | 1.40560300  | 0.05751600  |
| C   | 1.04242900   | 0.92467800  | 0.06497000  |
| C   | 1.29508900   | -0.46823900 | 0.02762600  |
| C   | 0.25503700   | -1.40276400 | -0.00751900 |
| C   | -2.34894200  | -1.72785500 | -0.03456400 |
| C   | 2.34975800   | 1.73053200  | 0.08861500  |
| C   | -2.72743900  | 0.63099600  | 0.02555800  |
| C   | -3.36224700  | -0.59559600 | 0.01217800  |
| C   | -4.75868000  | -0.48827800 | 0.00811300  |
| C   | -5.18697000  | 0.83370800  | 0.02639400  |
| S   | -3.82479100  | 1.94795300  | 0.03138100  |
| C   | 2.72817100   | -0.62821100 | 0.02543600  |
| C   | 3.36308600   | 0.59827700  | 0.04178500  |
| C   | 4.75952700   | 0.49080700  | 0.04743300  |
| C   | 5.18759600   | -0.83125500 | 0.03027400  |
| S   | 3.82533600   | -1.94521200 | 0.01188800  |
| C   | -2.38631100  | -2.63014100 | 1.20365400  |
| C   | -2.56310400  | -2.50914900 | -1.33741600 |
| C   | 2.38930800   | 2.63444900  | -1.14834800 |
| C   | -1.81042000  | -3.90390500 | 1.16991500  |
| C   | -1.76379200  | -4.69693600 | 2.31122700  |
| C   | -2.29217300  | -4.25189400 | 3.52608200  |
| C   | -2.86188800  | -2.97691500 | 3.55604400  |
| C   | -2.90839100  | -2.17847600 | 2.41741400  |
| C   | -3.59226900  | -3.45530600 | -1.41338700 |
| C   | -3.86419100  | -4.12192900 | -2.60102800 |
| C   | -3.12054800  | -3.87203600 | -3.75945400 |
| C   | -2.10145200  | -2.92236000 | -3.68120700 |
| C   | -1.82549900  | -2.24997200 | -2.49262700 |
| C   | 1.81355600   | 3.90825100  | -1.11382300 |
| C   | 1.76815600   | 4.70246000  | -2.25433600 |
| C   | 2.29775200   | 4.25856200  | -3.46908000 |
| C   | 2.86749100   | 2.98362300  | -3.49973400 |
| C   | 2.91270800   | 2.18391000  | -2.36195300 |
| C   | -2.27510600  | -5.12553800 | 4.74846000  |
| C   | -3.39714000  | -4.61971500 | -5.03305900 |
| C   | 2.28140200   | 5.13327300  | -4.69068800 |
| C   | 3.39191600   | 4.61368100  | 5.09355600  |
| C   | 3.59130000   | 3.45555200  | 1.47214500  |
| C   | 3.86174200   | 4.12006100  | 2.66127400  |
| C   | 3.11643200   | 3.86840200  | 3.81829300  |
| C   | 2.09712700   | 2.91925300  | 3.73692900  |
| C   | 1.82263300   | 2.24899400  | 2.54673400  |
| C   | 2.56196400   | 2.50978300  | 1.39299700  |
| C   | -9.03924300  | 1.49191200  | 0.06927600  |
| C   | -8.37218200  | 2.73300400  | 0.09402600  |
| C   | -6.97123500  | 2.62333300  | 0.09000800  |
| C   | -6.53829200  | 1.30128800  | 0.03947800  |
| S   | -7.87101300  | 0.18690800  | 0.02912600  |
| C   | -10.44269600 | 1.45818600  | 0.01869400  |
| C   | -11.36761200 | 0.43420700  | -0.01443900 |
| C   | -11.05918100 | -0.99921500 | 0.08742000  |
| C   | -12.35558500 | -1.71180300 | 0.11106100  |
| C   | -13.39791500 | -0.77838500 | 0.01362600  |
| C   | -12.81303300 | 0.57585900  | -0.09402300 |
| O   | -9.95770100  | -1.52577800 | 0.15502300  |
| C   | -13.54769800 | 1.73384200  | -0.27181500 |
| C   | -12.56697000 | -3.07367500 | 0.21662100  |
| C   | -13.89056200 | -3.49288000 | 0.22574300  |
| C   | -14.95606400 | -2.60170300 | 0.13495600  |
| C   | -14.71833200 | -1.23432700 | 0.02652000  |
| C   | 9.03969000   | -1.49207400 | 0.01543600  |
| C   | 8.37213200   | -2.73261800 | 0.05538100  |
| C   | 6.97135200   | -2.62174400 | 0.06947200  |
| C   | 6.53878700   | -1.29948800 | 0.02285600  |
| S   | 7.87190100   | -0.18626100 | -0.01360900 |
| O   | 6.10675200   | -3.66833100 | 0.10772500  |

|   |              |             |             |
|---|--------------|-------------|-------------|
| C | 10.44216000  | -1.45986200 | -0.05718100 |
| C | 11.36730100  | -0.43705700 | -0.11370000 |
| C | 11.06126600  | 0.99762600  | -0.02315200 |
| C | 12.35809800  | 1.70980400  | -0.03154800 |
| C | 13.39815500  | 0.77467300  | -0.13642400 |
| C | 12.81110100  | -0.58057900 | -0.21595400 |
| O | 9.96130000   | 1.52554200  | 0.05736300  |
| C | 13.54272700  | -1.74112400 | -0.38976400 |
| C | 12.57184800  | 3.07282100  | 0.05250100  |
| C | 13.89548500  | 3.49141700  | 0.03122100  |
| C | 14.95883000  | 2.59860700  | -0.06827700 |
| C | 14.71869000  | 1.23006400  | -0.15443800 |
| O | -9.05869500  | 3.88714400  | 0.16064900  |
| O | -6.10652100  | 3.67014900  | 0.11347500  |
| O | 9.05903700   | -3.88641400 | 0.11985500  |
| C | -8.80997100  | 4.82896100  | -0.89339500 |
| C | -6.12140700  | 4.41854700  | 1.33618300  |
| C | 6.12670300   | -4.40210100 | 1.33948400  |
| C | 8.79292600   | -4.83828500 | -0.92058700 |
| C | -12.98125000 | 3.02960400  | -0.43827500 |
| N | -12.57545300 | 4.11059300  | -0.58740300 |
| C | -14.96979600 | 1.75758300  | -0.33207200 |
| N | -16.13019400 | 1.83101700  | -0.38632200 |
| C | 14.96359800  | -1.76598900 | -0.47365900 |
| N | 16.12289500  | -1.84049800 | -0.54677200 |
| C | 12.97403500  | -3.03922000 | -0.52776100 |
| N | 12.56655300  | -4.12245000 | -0.65435200 |
| H | -0.45854600  | 2.47197100  | 0.07695200  |
| H | 0.45937800   | -2.46911300 | -0.02775200 |
| H | -5.44539200  | -1.32762400 | -0.00785600 |
| H | 5.44642900   | 1.32991200  | 0.06766400  |
| H | -1.40360800  | -4.28673300 | 0.23819100  |
| H | -1.31005600  | -5.68367300 | 2.25508600  |
| H | -3.27860100  | -2.59956000 | 4.48695900  |
| H | -3.35586300  | -1.19067400 | 2.47804400  |
| H | -4.18288800  | -3.67999700 | -0.52933000 |
| H | -4.67029500  | -4.85133100 | -2.62962300 |
| H | -1.50901500  | -2.70020200 | -4.56564400 |
| H | -1.02699000  | -1.51505300 | -2.47258100 |
| H | 1.40549300   | 4.29006700  | -0.18222300 |
| H | 1.31401100   | 5.68897700  | -2.19781700 |
| H | 3.28486600   | 2.60701600  | -4.43063600 |
| H | 3.35976100   | 1.19597600  | -2.42343600 |
| H | -3.18425800  | -5.73564600 | 4.80818500  |
| H | -1.42377100  | -5.81180500 | 4.73712500  |
| H | -2.22310400  | -4.53011400 | 5.66425900  |
| H | -4.46931300  | -4.78549200 | -5.17350200 |
| H | -3.01780900  | -4.07871100 | -5.90399500 |
| H | -2.91623900  | -5.60504700 | -5.02330300 |
| H | 3.18880000   | 5.74629800  | -4.74734000 |
| H | 2.23371000   | 4.53847100  | -5.60709800 |
| H | 1.42782500   | 5.81677600  | -4.68107200 |
| H | 4.46457300   | 4.77148200  | 5.23956200  |
| H | 2.91859800   | 5.60264300  | 5.08160900  |
| H | 3.00421400   | 4.07524900  | 5.96239100  |
| H | 4.18316700   | 3.68158500  | 0.58928100  |
| H | 4.66801100   | 4.84918100  | 2.69218900  |
| H | 1.50337200   | 2.69582600  | 4.62019700  |
| H | 1.02380800   | 1.51446600  | 2.52410900  |
| H | -10.83420900 | 2.47195000  | 0.01490600  |
| H | -11.74516700 | -3.77767200 | 0.28908300  |
| H | -15.56311200 | -0.56164000 | -0.04160800 |
| H | 10.83270600  | -2.47399800 | -0.05998100 |
| H | 11.75175600  | 3.77813100  | 0.13133400  |
| H | 15.56190100  | 0.55619900  | -0.22991300 |
| H | -9.43299200  | 5.69367700  | -0.66927000 |
| H | -7.75653900  | 5.11656600  | -0.92621200 |
| H | -9.10836300  | 4.39978200  | -1.85420300 |
| H | -7.11030900  | 4.84904300  | 1.51846400  |
| H | -5.83601300  | 3.78096400  | 2.17867700  |
| H | -5.38804600  | 5.21532400  | 1.21221400  |
| H | 7.11669300   | -4.82997400 | 1.52235900  |
| H | 5.84453200   | -3.75445000 | 2.17524800  |
| H | 5.39319400   | -5.20060100 | 1.22809400  |
| H | 9.41928200   | -5.70099000 | -0.69805500 |
| H | 7.73910100   | -5.12571500 | -0.93363600 |
| H | 9.07602500   | -4.41882400 | -1.89031800 |
| H | 15.97144500  | 2.98685400  | -0.07736800 |
| H | -15.96846200 | -2.99033200 | 0.15010500  |
| F | 14.16354200  | 4.79675800  | 0.10998400  |

F -14.15644200 -4.79715600 0.32637300

## ITOIC-2F

0 1  
C -1.05640300 0.90470200 0.01085000  
C -1.28671600 -0.49210200 -0.02777000  
C -0.23188200 -1.40995400 -0.06198900  
C 1.05692000 -0.90837700 -0.06606100  
C 1.28719300 0.48839600 -0.02684900  
C 0.23239300 1.40625200 0.00745600  
C -2.37641000 1.68974500 0.03074400  
C 2.37699300 -1.69328500 -0.08793700  
C -2.71691100 -0.67486400 -0.03346700  
C -3.37141200 0.54153700 -0.01850400  
C -4.76571100 0.41155600 -0.01479800  
C -5.17246300 -0.91736200 -0.03539500  
S -3.79242500 -2.00945800 -0.04233700  
C 2.71735100 0.67124800 -0.02259000  
C 3.37200300 -0.54503200 -0.03910500  
C 4.76631800 -0.41483400 -0.04443400  
C 5.17277400 0.91421000 -0.02696300  
S 3.79261400 2.00594600 -0.00852000  
C -2.42627900 2.59293900 -1.20639000  
C -2.60436000 2.46610200 1.33422800  
C 2.42849600 -2.59718300 1.14860900  
C -1.86565000 3.87350100 -1.17119400  
C -1.82915800 4.66862800 -2.31134600  
C -2.35306600 4.21905000 -3.52652400  
C -2.90778500 2.93756200 -3.55785200  
C -2.94395900 2.13690100 -2.42033800  
C -3.64556900 3.39906000 1.40883800  
C -3.92887600 4.06050200 2.59674900  
C -3.18521700 3.81820400 3.75674100  
C -2.15427100 2.88123600 3.67990300  
C -1.86676500 2.21419300 2.49109200  
C 1.86780200 -3.87770800 1.11335300  
C 1.83206000 -4.67318900 2.25324900  
C 2.35688700 -4.22396700 3.46816300  
C 2.91184100 -2.94259100 3.49945200  
C 2.94721200 -2.14148200 2.36223400  
C -2.34683300 5.09449700 -4.74770900  
C -3.47418300 4.56069700 5.03062100  
C 2.35085400 -5.09960700 4.68919400  
C 3.47103800 -4.55928700 -5.09162100  
C 3.64475400 -3.40147400 -1.46877600  
C 3.92712800 -4.06170300 -2.65754700  
C 3.18255100 -3.81826900 -3.81676300  
C 2.15156400 -2.88154200 -3.73808400  
C 1.86497300 -2.21571900 -2.54829000  
C 2.60355900 -2.46859200 -1.39227600  
C -9.01311700 -1.63761000 -0.07496000  
C -8.32590000 -2.86810200 -0.10557000  
C -6.92713400 -2.73570400 -0.10322500  
C -6.51577200 -1.40666900 -0.04848300  
S -7.86627500 -0.31392800 -0.03157300  
C -10.41621100 -1.62726100 -0.02227800  
C -11.35819800 -0.61861600 0.01815700  
C -11.07409200 0.82148500 -0.07244700  
C -12.38028200 1.51127400 -0.08241400  
C -13.40603900 0.56151000 0.01057600  
C -12.79880200 -0.78621300 0.09992300  
O -9.98177200 1.36651000 -0.14092200  
C -13.51828000 -1.95526700 0.26292600  
C -12.61783200 2.87285000 -0.17249800  
C -13.93927400 3.28250400 -0.17027900  
C -14.97583100 2.34791700 -0.08035800  
C -14.73535200 0.98636100 0.01223800  
C 9.01308500 1.63761100 -0.01529100  
C 8.32519500 2.86748900 -0.05745600  
C 6.92662500 2.73370800 -0.07008900  
C 6.51589700 1.40433900 -0.02037500  
S 7.86691000 0.31292700 0.01797200  
O 6.04484300 3.76572800 -0.11105000  
C 10.41540800 1.62892000 0.05428700  
C 11.35804100 0.62167600 0.11161400  
C 11.07638400 -0.81941700 0.02993200  
C 12.38324200 -1.50794600 0.04137100

|   |              |             |             |
|---|--------------|-------------|-------------|
| C | 13.40690300  | -0.55632500 | 0.13832500  |
| C | 12.79741700  | 0.79152200  | 0.20861600  |
| O | 9.98538500   | -1.36614100 | -0.04565500 |
| C | 13.51407100  | 1.96268600  | 0.36902800  |
| C | 12.62317400  | -2.87001600 | -0.03380700 |
| C | 13.94488100  | -3.27824100 | -0.01209700 |
| C | 14.97939200  | -2.34180600 | 0.08200700  |
| C | 14.73649400  | -0.97974500 | 0.15974100  |
| F | -14.25744900 | 4.57096300  | -0.25471900 |
| F | -16.22679300 | 2.80187100  | -0.08582500 |
| F | 14.26524600  | -4.56707500 | -0.08129400 |
| F | 16.23077000  | -2.79443500 | 0.09560500  |
| O | -8.99457900  | -4.03203800 | -0.17590100 |
| O | -6.04531600  | -3.76794900 | -0.13235200 |
| O | 8.99409000   | 4.03117000  | -0.12585700 |
| C | -8.72619500  | -4.97777100 | 0.86994700  |
| C | -6.04811500  | -4.51000800 | -1.35911300 |
| C | 6.04957700   | 4.49347500  | -1.34665100 |
| C | 8.71006900   | 4.98584500  | 0.90741200  |
| C | -12.93415600 | -3.24563600 | 0.40913300  |
| N | -12.51239200 | -4.32260700 | 0.54109400  |
| C | -14.93989200 | -1.99589600 | 0.32384400  |
| N | -16.09969300 | -2.07789100 | 0.37714900  |
| C | 14.93483600  | 2.00517000  | 0.44616000  |
| N | 16.09382800  | 2.08899600  | 0.51265000  |
| C | 12.92748400  | 3.25395500  | 0.49613200  |
| N | 12.50359200  | 4.33183700  | 0.61302400  |
| H | -0.41936100  | -2.47938500 | -0.08300200 |
| H | 0.41992200   | 2.47566000  | 0.02935600  |
| H | -5.46599200  | 1.23956800  | 0.00276100  |
| H | 5.46684300   | -1.24256700 | -0.06537400 |
| H | -1.46281600  | 4.25978700  | -0.23916300 |
| H | -1.38708200  | 5.66057200  | -2.25410000 |
| H | -3.32073000  | 2.55665800  | -4.48900000 |
| H | -3.37971300  | 1.14395800  | -2.48220900 |
| H | -4.23668700  | 3.61758900  | 0.52358200  |
| H | -4.74399500  | 4.77985100  | 2.62428200  |
| H | -1.56151900  | 2.66513400  | 4.56562000  |
| H | -1.05916200  | 1.48924000  | 2.47213100  |
| H | 1.46393300   | -4.26358600 | 0.18159000  |
| H | 1.38942100   | -5.66488100 | 2.19618800  |
| H | 3.32522800   | -2.56184400 | 4.43044900  |
| H | 3.38270400   | -1.14844500 | 2.42438300  |
| H | -3.26256800  | 5.69485600  | -4.80557100 |
| H | -1.50294900  | 5.78989600  | -4.73633200 |
| H | -2.28941600  | 4.50093300  | -5.66438800 |
| H | -4.54855400  | 4.71450000  | 5.16780500  |
| H | -3.09175800  | 4.02250100  | 5.90194300  |
| H | -3.00407500  | 5.55124800  | 5.02397500  |
| H | 3.26490100   | -5.70275900 | 4.74487400  |
| H | 2.29723500   | -4.50597100 | 5.60603100  |
| H | 1.50477500   | -5.79235800 | 4.67960900  |
| H | 4.54591500   | -4.70494200 | -5.23383700 |
| H | 3.00880200   | -5.55350200 | -5.08217200 |
| H | 3.08046500   | -4.02452100 | -5.96143100 |
| H | 4.23653700   | -3.62085600 | -0.58419200 |
| H | 4.74225100   | -4.78099000 | -2.68640900 |
| H | 1.55807000   | -2.66466300 | -4.62315000 |
| H | 1.05721500   | -1.49095300 | -2.52773900 |
| H | -10.79112100 | -2.64728100 | -0.02283400 |
| H | -11.80848700 | 3.59160000  | -0.24240400 |
| H | -15.58517800 | 0.31959400  | 0.07823100  |
| H | 10.78918000  | 2.64935600  | 0.05337900  |
| H | 11.81540900  | -3.59020400 | -0.10712800 |
| H | 15.58484900  | -0.31155300 | 0.23008100  |
| H | -9.33441000  | -5.85150700 | 0.64040400  |
| H | -7.66783800  | -5.24691000 | 0.89782200  |
| H | -9.02941500  | -4.56137900 | 1.83484600  |
| H | -7.02946800  | -4.95681500 | -1.54295700 |
| H | -5.77472500  | -3.86300300 | -2.19835700 |
| H | -5.30076900  | -5.29439500 | -1.23990100 |
| H | 7.03163500   | 4.93749300  | -1.53380900 |
| H | 5.77702600   | 3.83674000  | -2.17847500 |
| H | 5.30254900   | 5.27966800  | -1.23773500 |
| H | 9.32235900   | 5.85720300  | 0.67972000  |
| H | 7.65166000   | 5.25572500  | 0.91672600  |
| H | 8.99825900   | 4.57779000  | 1.88048300  |

# IEICO

|     |              |             |             |
|-----|--------------|-------------|-------------|
| 0 1 |              |             |             |
| C   | 1.12281500   | 0.82504000  | -0.01410400 |
| C   | 1.24604300   | -0.58443800 | 0.05565600  |
| C   | 0.12416100   | -1.42033700 | 0.06661800  |
| C   | -1.12278400  | -0.82499800 | 0.01454600  |
| C   | -1.24601600  | 0.58448100  | -0.05519400 |
| C   | -0.12413300  | 1.42038000  | -0.06616600 |
| C   | 2.49855800   | 1.50841100  | 0.00598600  |
| C   | -2.49852100  | -1.50837700 | -0.00560400 |
| C   | 2.65629600   | -0.87355500 | 0.11048400  |
| C   | 3.40229900   | 0.28943400  | 0.09818000  |
| C   | 4.78126500   | 0.05518200  | 0.14345100  |
| C   | 5.08663800   | -1.30158800 | 0.19578100  |
| S   | 3.62651500   | -2.28441200 | 0.18319200  |
| C   | -2.65627200  | 0.87359200  | -0.11001900 |
| C   | -3.40226600  | -0.28939900 | -0.09775000 |
| C   | -4.78123900  | -0.05515900 | -0.14302000 |
| C   | -5.08662100  | 1.30160500  | -0.19531700 |
| S   | -3.62651100  | 2.28444600  | -0.18266600 |
| C   | 2.57415800   | 2.41511900  | 1.23979200  |
| C   | 2.83006400   | 2.25744300  | -1.29051800 |
| C   | -2.57408700  | -2.41501300 | -1.23945800 |
| C   | 2.08611000   | 3.72475200  | 1.18459200  |
| C   | 2.07190300   | 4.52983600  | 2.31780700  |
| C   | 2.54776200   | 4.06201300  | 3.54614400  |
| C   | 3.03072600   | 2.75281300  | 3.59708200  |
| C   | 3.04345900   | 1.94149700  | 2.46625300  |
| C   | 3.93417800   | 3.11778900  | -1.32641000 |
| C   | 4.30942600   | 3.75065900  | -2.50417500 |
| C   | 3.59838700   | 3.55126800  | -3.69256300 |
| C   | 2.50452000   | 2.68612500  | -3.65415000 |
| C   | 2.12480100   | 2.04757800  | -2.47537800 |
| C   | -2.08608600  | -3.72463900 | -1.18433800 |
| C   | -2.07184600  | -4.52964600 | -2.31764000 |
| C   | -2.54763000  | -4.06172800 | -3.54593900 |
| C   | -3.03057100  | -2.75248600 | -3.59679800 |
| C   | -3.04332900  | -1.94127600 | -2.46592700 |
| C   | 2.56665100   | 4.94706400  | 4.76029200  |
| C   | 3.98866300   | 4.26428700  | -4.95634500 |
| C   | -2.56656400  | -4.94655700 | -4.76024700 |
| C   | -3.98911400  | -4.26437200 | 4.95652100  |
| C   | -3.93421900  | -3.11780700 | 1.32666700  |
| C   | -4.30949400  | -3.75076100 | 2.50434600  |
| C   | -3.59846400  | -3.55146700 | 3.69278700  |
| C   | -2.50456200  | -2.68640900 | 3.65444600  |
| C   | -2.12479700  | -2.04775700 | 2.47571300  |
| C   | -2.83005700  | -2.25747600 | 1.29085700  |
| C   | 8.85938700   | -2.30609300 | 0.27817100  |
| C   | 8.10241500   | -3.47651900 | 0.34373600  |
| C   | 6.72416400   | -3.24558200 | 0.34337600  |
| C   | 6.38754300   | -1.88632900 | 0.24483100  |
| S   | 7.81671400   | -0.91492400 | 0.17378800  |
| C   | 10.26527800  | -2.29134700 | 0.14548500  |
| C   | 11.20776300  | -1.29252500 | 0.09036400  |
| C   | 12.48910400  | -1.59973500 | -0.60660600 |
| C   | 13.10747200  | -0.28944300 | -0.91116400 |
| C   | 12.32763400  | 0.73418600  | -0.34578000 |
| C   | 11.22924300  | 0.11326500  | 0.42656500  |
| O   | 12.90995900  | -2.70153300 | -0.91179100 |
| C   | 10.54169800  | 0.72169700  | 1.45976300  |
| C   | 14.25054800  | -0.02427900 | -1.64623800 |
| C   | 14.61204500  | 1.30846600  | -1.83689200 |
| C   | 13.83471700  | 2.33415000  | -1.29479700 |
| C   | 12.69265300  | 2.06484300  | -0.53902300 |
| C   | -8.85937500  | 2.30605300  | -0.27809600 |
| C   | -8.10242800  | 3.47650700  | -0.34334500 |
| C   | -6.72416300  | 3.24559800  | -0.34279300 |
| C   | -6.38753100  | 1.88633900  | -0.24445000 |
| S   | -7.81669900  | 0.91489400  | -0.17382200 |
| C   | -10.26529300 | 2.29126500  | -0.14561800 |
| C   | -11.20778400 | 1.29243300  | -0.09079000 |
| C   | -12.48924300 | 1.59953600  | 0.60602100  |
| C   | -13.10761900 | 0.28919400  | 0.91034600  |
| C   | -12.32767200 | -0.73435000 | 0.34496100  |
| C   | -11.22919200 | -0.11332500 | -0.42716100 |
| O   | -12.91019000 | 2.70129200  | 0.91123100  |
| C   | -10.54149600 | -0.72160600 | -1.46034300 |

|   |              |             |             |
|---|--------------|-------------|-------------|
| C | -14.25079800 | 0.02391700  | 1.64522000  |
| C | -14.61229200 | -1.30885600 | 1.83566200  |
| C | -13.83486600 | -2.33446100 | 1.29355300  |
| C | -12.69269700 | -2.06504000 | 0.53798300  |
| C | 9.81842900   | -0.02387900 | 2.43204300  |
| N | 9.27017000   | -0.61078500 | 3.27399400  |
| C | 10.63098800  | 2.11405300  | 1.74020000  |
| N | 10.66924300  | 3.25080000  | 1.98656200  |
| C | -10.63070900 | -2.11393100 | -1.74095400 |
| N | -10.66892100 | -3.25064800 | -1.98746000 |
| C | -9.81814100  | 0.02413000  | -2.43243800 |
| N | -9.26980900  | 0.61117800  | -3.27424200 |
| H | 0.23213100   | -2.49995900 | 0.11265000  |
| H | -0.23210400  | 2.50000100  | -0.11220400 |
| H | 5.54252100   | 0.82765400  | 0.14182200  |
| H | -5.54248200  | -0.82764300 | -0.14140100 |
| H | 1.72304100   | 4.12535600  | 0.24222000  |
| H | 1.68612800   | 5.54403700  | 2.24510300  |
| H | 3.40590200   | 2.35753500  | 4.53811600  |
| H | 3.42360400   | 0.92718300  | 2.54390300  |
| H | 4.50172000   | 3.30171000  | -0.41817700 |
| H | 5.17118000   | 4.41411200  | -2.50090900 |
| H | 1.93454000   | 2.50482100  | -4.56231200 |
| H | 1.27024800   | 1.37830600  | -2.48621600 |
| H | -1.72306200  | -4.12533300 | -0.24198700 |
| H | -1.68610200  | -5.54386100 | -2.24500300 |
| H | -3.40568400  | -2.35711700 | -4.53782300 |
| H | -3.42343500  | -0.92694300 | -2.54350600 |
| H | 3.50182800   | 5.51679200  | 4.81683700  |
| H | 1.74663100   | 5.67040100  | 4.74001100  |
| H | 2.48584700   | 4.36314700  | 5.68131000  |
| H | 5.07597400   | 4.30830500  | -5.07017000 |
| H | 3.57262800   | 3.77032200  | -5.83834300 |
| H | 3.62259500   | 5.29779400  | -4.95440700 |
| H | -3.50437800  | -5.51157700 | -4.82024800 |
| H | -2.47964900  | -4.36292200 | -5.68090800 |
| H | -1.75019200  | -5.67389900 | -4.73717300 |
| H | -5.07632900  | -4.30143200 | 5.07395000  |
| H | -3.62999400  | -5.30028900 | 4.95133500  |
| H | -3.56693000  | -3.77480900 | 5.83803400  |
| H | -4.50172400  | -3.30166300 | 0.41839700  |
| H | -5.17124100  | -4.41422700 | 2.50098800  |
| H | -1.93455500  | -2.50525600 | 4.56261800  |
| H | -1.27018200  | -1.37856500 | 2.48661700  |
| H | 8.56467500   | -4.45477400 | 0.39231200  |
| H | 10.68743700  | -3.27261000 | -0.08019700 |
| H | 14.83627200  | -0.84003500 | -2.05828800 |
| H | 12.11043900  | 2.88334700  | -0.13401600 |
| H | -8.56469300  | 4.45476300  | -0.39182300 |
| H | -10.68750200 | 3.27249500  | 0.08011900  |
| H | -14.83659800 | 0.83961500  | 2.05727800  |
| H | -12.11041500 | -2.88348100 | 0.13294700  |
| O | 5.73921900   | -4.15623500 | 0.41264900  |
| O | -5.73923400  | 4.15630200  | -0.41170500 |
| C | 6.12352200   | -5.52061800 | 0.49817300  |
| C | -6.12359400  | 5.52065100  | -0.49748600 |
| H | 5.19761900   | -6.09185100 | 0.55012900  |
| H | 6.69161100   | -5.82374500 | -0.38802500 |
| H | 6.71790600   | -5.70336300 | 1.39988800  |
| H | -6.69201900  | 5.82382300  | 0.38848200  |
| H | -5.19770900  | 6.09194200  | -0.54914700 |
| H | -6.71767300  | 5.70327500  | -1.39942700 |
| H | 14.12301500  | 3.36726600  | -1.46268700 |
| H | 15.49904700  | 1.55409000  | -2.41249100 |
| H | -14.12317300 | -3.36760300 | 1.46127100  |
| H | -15.49937200 | -1.55457000 | 2.41110300  |

## ATT-2

|     |             |             |             |
|-----|-------------|-------------|-------------|
| 0 1 |             |             |             |
| C   | 1.41940100  | -0.31831100 | -0.11217900 |
| C   | 0.61461900  | 0.82423800  | -0.16332200 |
| C   | -0.75625200 | 0.64455900  | -0.14023700 |
| C   | -1.30891400 | -0.65697400 | -0.05986600 |
| C   | -0.50415900 | -1.79971200 | -0.01214400 |
| C   | 0.86677700  | -1.62001600 | -0.03430100 |
| C   | -1.85258600 | 1.72012200  | -0.16544000 |
| C   | -3.09089000 | 0.84322500  | -0.07211600 |



|   |              |             |             |
|---|--------------|-------------|-------------|
| C | -2.73989600  | -0.49154100 | -0.03245100 |
| C | 1.96338600   | -2.69559800 | -0.00595700 |
| C | 3.20269200   | -1.81789700 | -0.07796100 |
| C | 2.85043000   | -0.48269500 | -0.12603500 |
| C | -4.47817300  | 1.05029800  | -0.05832500 |
| C | -5.18331300  | -0.14476400 | 0.00559800  |
| S | -4.10340600  | -1.52721700 | 0.03960000  |
| C | 4.58833800   | -2.02200500 | -0.07910600 |
| C | 5.29499200   | -0.82629500 | -0.13341100 |
| S | 4.21243300   | 0.55434200  | -0.16560400 |
| C | 1.78860400   | -3.59998200 | -1.23155600 |
| C | 2.01020800   | -3.48652300 | 1.30725400  |
| C | -1.66486000  | 2.63787000  | 1.04788700  |
| C | -1.91371300  | 2.49848200  | -1.48586500 |
| C | 0.92155400   | -4.69634600 | -1.18268800 |
| C | 0.68793200   | -5.47241200 | -2.31208100 |
| C | 1.31266600   | -5.18797600 | -3.52992700 |
| C | 2.17496000   | -4.09054900 | -3.57433000 |
| C | 2.40941000   | -3.30820800 | -2.44738600 |
| C | 2.78458700   | -4.64992500 | 1.38520400  |
| C | 2.91456200   | -5.34251600 | 2.58217600  |
| C | 2.27741600   | -4.90268300 | 3.74720600  |
| C | 1.51373900   | -3.73758100 | 3.66638000  |
| C | 1.38114200   | -3.03850900 | 2.46898000  |
| C | -0.79388600  | 3.73003500  | 0.97779500  |
| C | -0.54855300  | 4.51997300  | 2.09484300  |
| C | -1.16579400  | 4.25453800  | 3.32083700  |
| C | -2.03246400  | 3.16176500  | 3.38625500  |
| C | -2.27819400  | 2.36503400  | 2.27173300  |
| C | -2.69465700  | 3.65741000  | -1.56713100 |
| C | -2.83771200  | 4.33909600  | -2.76867000 |
| C | -2.20690100  | 3.89302400  | -3.93491300 |
| C | -1.43576000  | 2.73327700  | -3.85028100 |
| C | -1.29049500  | 2.04449800  | -2.64823700 |
| C | 1.08513100   | -6.04986500 | -4.73943000 |
| C | 2.39352100   | -5.67327700 | 5.03175400  |
| C | -2.33841000  | 4.65224000  | -5.22471600 |
| C | -0.92613800  | 5.13222200  | 4.51654000  |
| C | -6.60269100  | -0.31581300 | 0.05550700  |
| C | 6.71322300   | -0.64785700 | -0.15346700 |
| S | -7.37271600  | -1.80841900 | -0.35637100 |
| C | -8.98661200  | -1.20990100 | -0.06375100 |
| C | -8.91070300  | 0.13138600  | 0.35691900  |
| C | -7.57703100  | 0.61351700  | 0.41269900  |
| S | 7.78040900   | -1.96225800 | 0.20825700  |
| C | 9.23105000   | -1.01022900 | 0.01614400  |
| C | 8.87665600   | 0.30385800  | -0.33992900 |
| C | 7.47175100   | 0.48958500  | -0.42525600 |
| C | 9.59148200   | 1.47103300  | -0.73494100 |
| C | 8.74630300   | 2.49113400  | -1.06309800 |
| S | 7.05267500   | 2.09648800  | -0.93413700 |
| C | -9.83974900  | 1.09030100  | 0.85477300  |
| C | -9.21755300  | 2.24497000  | 1.23285400  |
| S | -7.48582500  | 2.23272700  | 1.02763200  |
| C | 10.47391100  | -1.66366500 | 0.13252000  |
| C | -10.05560900 | -2.12077700 | -0.17587900 |
| C | 11.75550200  | -1.19365100 | 0.31296300  |
| C | -11.41869800 | -1.95274300 | -0.27214500 |
| C | 12.87274500  | -2.09444900 | -0.09405900 |
| C | 14.09345900  | -1.25994400 | -0.08811800 |
| C | 13.77345600  | 0.02163600  | 0.39046700  |
| C | 12.34584900  | 0.03671800  | 0.78607100  |
| C | -12.27174400 | -3.11394600 | 0.11507600  |
| C | -13.65055600 | -2.59083800 | 0.22144800  |
| C | -13.66425800 | -1.24304400 | -0.17509800 |
| C | -12.30428500 | -0.86905100 | -0.62845000 |
| C | 15.37362600  | -1.60084600 | -0.49045800 |
| C | 16.36223700  | -0.62014600 | -0.42792500 |
| C | 16.05290300  | 0.66219700  | 0.02984400  |
| C | 14.76497600  | 0.99902500  | 0.44971900  |
| C | -14.79170700 | -3.24710200 | 0.65052000  |
| C | -15.98237500 | -2.52422500 | 0.70093700  |
| C | -16.00552100 | -1.17954300 | 0.32525800  |
| C | -14.85696300 | -0.52447600 | -0.12226200 |
| O | 12.78295600  | -3.26816200 | -0.40761700 |
| C | 11.77033200  | 0.95872600  | 1.64144700  |
| C | -12.00742800 | 0.21283100  | -1.43736800 |
| O | -11.89464000 | -4.25058900 | 0.33819000  |
| C | 9.08484200   | 3.85567800  | -1.50543800 |
| O | 8.24978300   | 4.69292600  | -1.77814700 |

|   |              |             |             |
|---|--------------|-------------|-------------|
| O | 10.40233600  | 4.04551400  | -1.56613100 |
| C | 10.81123300  | 5.35271600  | -1.98337300 |
| C | -9.82082400  | 3.47173800  | 1.78327800  |
| O | -9.17391800  | 4.45194600  | 2.08888800  |
| O | -11.14384500 | 3.36496200  | 1.90060000  |
| C | -11.80513800 | 4.52204300  | 2.42384400  |
| C | 10.51148300  | 0.74286100  | 2.26672800  |
| N | 9.50698900   | 0.57355600  | 2.82907800  |
| C | 12.43759000  | 2.13651900  | 2.08157300  |
| N | 12.94596100  | 3.11628300  | 2.45029700  |
| C | -10.77210100 | 0.33235500  | -2.13155500 |
| N | -9.79046300  | 0.43259900  | -2.74817000 |
| C | -12.95132000 | 1.22847700  | -1.75921100 |
| N | -13.69148500 | 2.08440800  | -2.03098300 |
| H | 1.05300500   | 1.81634300  | -0.21543000 |
| H | -0.94239400  | -2.79193200 | 0.04058000  |
| H | -4.95943800  | 2.01865100  | -0.13154100 |
| H | 5.07359300   | -2.99154700 | -0.05376400 |
| H | 0.43101600   | -4.95425000 | -0.24831200 |
| H | 0.00772200   | -6.31820700 | -2.24482300 |
| H | 2.67354500   | -3.84022300 | -4.50775100 |
| H | 3.08272700   | -2.45922400 | -2.52070300 |
| H | 3.28530400   | -5.02355500 | 0.49612200  |
| H | 3.52291600   | -6.24342700 | 2.61267300  |
| H | 1.01170700   | -3.36479700 | 4.55596300  |
| H | 0.78283200   | -2.13307700 | 2.44751600  |
| H | -0.30979300  | 3.97380300  | 0.03625000  |
| H | 0.13449200   | 5.36198000  | 2.01123800  |
| H | -2.52626000  | 2.92701500  | 4.32621900  |
| H | -2.95524300  | 1.52057200  | 2.36125700  |
| H | -3.19008500  | 4.03621000  | -0.67726100 |
| H | -3.45158700  | 5.23609800  | -2.80178700 |
| H | -0.93751400  | 2.35664200  | -4.74038800 |
| H | -0.68619000  | 1.14311800  | -2.62377500 |
| H | 0.07539500   | -6.46985900 | -4.74595800 |
| H | 1.22698700   | -5.48471100 | -5.66467400 |
| H | 1.78733900   | -6.89180400 | -4.76029200 |
| H | 3.39046100   | -6.10838800 | 5.14728300  |
| H | 2.19561600   | -5.03681500 | 5.89829100  |
| H | 1.67403400   | -6.50018800 | 5.06078200  |
| H | -3.34686300  | 5.05804200  | -5.34740400 |
| H | -1.64296300  | 5.49938300  | -5.25527100 |
| H | -2.11854500  | 4.01644500  | -6.08639700 |
| H | 0.08875800   | 5.53972100  | 4.51537500  |
| H | -1.61786000  | 5.98298900  | 4.52462000  |
| H | -1.07387500  | 4.58344900  | 5.45066700  |
| H | 10.66660800  | 1.56694400  | -0.78838800 |
| H | -10.90724400 | 0.94939000  | 0.94719300  |
| H | 10.45244500  | -2.74429900 | -0.02603300 |
| H | -9.78114700  | -3.17481100 | -0.09152200 |
| H | 15.58524800  | -2.60506600 | -0.84417200 |
| H | 17.37659300  | -0.84932800 | -0.73917500 |
| H | 16.83084200  | 1.41879500  | 0.06204500  |
| H | 14.56089500  | 2.00395100  | 0.79757600  |
| H | -14.74469900 | -4.29280100 | 0.93804400  |
| H | -16.89638300 | -3.00410600 | 1.03653800  |
| H | -16.93819100 | -0.62663000 | 0.38028500  |
| H | -14.91104400 | 0.51949200  | -0.40460800 |
| H | 11.89950000  | 5.33598700  | -1.97355100 |
| H | 10.43894400  | 5.56511800  | -2.98776500 |
| H | 10.43310200  | 6.10766400  | -1.29105200 |
| H | -12.86245800 | 4.26550600  | 2.45545800  |
| H | -11.43494100 | 4.75168700  | 3.42522300  |
| H | -11.63898600 | 5.38191400  | 1.77162400  |

## IEICO4F

|     |             |             |             |
|-----|-------------|-------------|-------------|
| O 1 |             |             |             |
| C   | 1.14813200  | 0.78878200  | 0.03514800  |
| C   | 1.22623900  | -0.62576000 | 0.04596300  |
| C   | 0.07870800  | -1.42535900 | 0.00672100  |
| C   | -1.14799000 | -0.78892300 | -0.03517900 |
| C   | -1.22609800 | 0.62562000  | -0.04598500 |
| C   | -0.07856600 | 1.42521700  | -0.00675600 |
| C   | 2.54364300  | 1.42697900  | 0.10146500  |
| C   | -2.54350300 | -1.42712100 | -0.10147900 |
| C   | 2.62557700  | -0.96162300 | 0.10916500  |
| C   | 3.40728700  | 0.17731000  | 0.15961700  |

|   |              |             |             |
|---|--------------|-------------|-------------|
| C | 4.77681400   | -0.10179100 | 0.21573700  |
| C | 5.03966200   | -1.46890200 | 0.21138500  |
| S | 3.55044300   | -2.40405400 | 0.13238400  |
| C | -2.62543500  | 0.96148100  | -0.10916500 |
| C | -3.40714900  | -0.17745300 | -0.15959800 |
| C | -4.77668100  | 0.10164900  | -0.21553500 |
| C | -5.03953500  | 1.46876200  | -0.21107000 |
| S | -3.55030300  | 2.40391100  | -0.13215800 |
| C | 2.62863800   | 2.28485800  | 1.36900900  |
| C | 2.91966800   | 2.21129000  | -1.16175800 |
| C | -2.62851000  | -2.28498900 | -1.36902800 |
| C | 2.19609500   | 3.61478600  | 1.35308500  |
| C | 2.19070000   | 4.37771000  | 2.51525000  |
| C | 2.62013600   | 3.84550700  | 3.73441900  |
| C | 3.04670000   | 2.51584800  | 3.74603800  |
| C | 3.05046600   | 1.74674500  | 2.58612400  |
| C | 4.05833900   | 3.02576700  | -1.15288200 |
| C | 4.47348200   | 3.68697900  | -2.30148200 |
| C | 3.76931700   | 3.56294300  | -3.50396600 |
| C | 2.63989600   | 2.74372500  | -3.51009100 |
| C | 2.22021300   | 2.07697400  | -2.36100700 |
| C | -2.19591600  | -3.61491000 | -1.35312600 |
| C | -2.19053300  | -4.37782400 | -2.51528600 |
| C | -2.62002300  | -3.84562100 | -3.73444900 |
| C | -3.04663200  | -2.51598700 | -3.74604500 |
| C | -3.05039500  | -1.74688700 | -2.58611800 |
| C | 2.64902700   | 4.68402300  | 4.98097500  |
| C | 4.20240200   | 4.30701600  | -4.73545300 |
| C | -2.64888400  | -4.68416700 | -4.98098500 |
| C | -4.20226200  | -4.30721000 | 4.73541200  |
| C | -4.05813900  | -3.02599200 | 1.15286500  |
| C | -4.47323700  | -3.68723700 | 2.30144600  |
| C | -3.76908000  | -3.56315300 | 3.50394800  |
| C | -2.63972400  | -2.74387300 | 3.51007900  |
| C | -2.22007000  | -2.07708400 | 2.36098800  |
| C | -2.91950200  | -2.21144100 | 1.16174700  |
| C | 8.77716900   | -2.59458700 | 0.30049000  |
| C | 7.98284900   | -3.74268400 | 0.28515900  |
| C | 6.61353500   | -3.46850900 | 0.27784100  |
| C | 6.32060200   | -2.09480300 | 0.25254600  |
| S | 7.77986600   | -1.16664100 | 0.26228000  |
| C | 10.18338000  | -2.61517500 | 0.19161800  |
| C | 11.15490100  | -1.64117900 | 0.22192500  |
| C | 12.43482400  | -1.93059900 | -0.48015800 |
| C | 13.09878500  | -0.61957700 | -0.66272200 |
| C | 12.34358200  | 0.37622900  | -0.02410900 |
| C | 11.20958600  | -0.26960200 | 0.67193700  |
| O | 12.83170300  | -3.01245600 | -0.87378300 |
| C | 10.51620600  | 0.27995300  | 1.73389300  |
| C | 14.26570300  | -0.34206100 | -1.35618600 |
| C | 14.66485100  | 0.98177800  | -1.41500900 |
| C | 13.91403200  | 1.98527700  | -0.79327100 |
| C | 12.75589900  | 1.70638000  | -0.08455200 |
| C | -8.77703200  | 2.59451900  | -0.29988200 |
| C | -7.98268200  | 3.74259600  | -0.28382900 |
| C | -6.61338200  | 3.46840200  | -0.27661600 |
| C | -6.32046800  | 2.09467200  | -0.25210100 |
| S | -7.77973800  | 1.16653300  | -0.26255400 |
| C | -10.18323200 | 2.61514100  | -0.19102900 |
| C | -11.15487600 | 1.64126700  | -0.22171600 |
| C | -12.43474300 | 1.93060900  | 0.48049200  |
| C | -13.09892500 | 0.61962100  | 0.66251600  |
| C | -12.34388400 | -0.37605000 | 0.02351000  |
| C | -11.20975600 | 0.26987800  | -0.67223900 |
| O | -12.83145000 | 3.01236300  | 0.87457700  |
| C | -10.51638100 | -0.27940000 | -1.73434500 |
| C | -14.26594900 | 0.34205500  | 1.35578500  |
| C | -14.66537800 | -0.98172400 | 1.41399800  |
| C | -13.91472900 | -1.98510200 | 0.79185000  |
| C | -12.75649300 | -1.70614300 | 0.08333200  |
| C | 9.74713700   | -0.51424500 | 2.62915800  |
| N | 9.16062000   | -1.14766800 | 3.40926100  |
| C | 10.64043900  | 1.64444100  | 2.11716700  |
| N | 10.71234600  | 2.76019200  | 2.44017600  |
| C | -10.64066300 | -1.64377400 | -2.11802200 |
| N | -10.71256400 | -2.75943600 | -2.44134100 |
| C | -9.74725900  | 0.51501400  | -2.62936600 |
| N | -9.16068300  | 1.14860800  | -3.40928500 |
| H | 0.15152900   | -2.50886800 | 0.00727100  |
| H | -0.15138200  | 2.50872700  | -0.00730300 |

|   |              |             |             |
|---|--------------|-------------|-------------|
| H | 5.56109000   | 0.64599200  | 0.25929700  |
| H | -5.56095700  | -0.64614000 | -0.25900300 |
| H | 1.86997000   | 4.06416300  | 0.41924000  |
| H | 1.84902200   | 5.40929200  | 2.47286200  |
| H | 3.38417600   | 2.07090400  | 4.67911800  |
| H | 3.38567100   | 0.71479000  | 2.63330500  |
| H | 4.62224700   | 3.15132900  | -0.23246000 |
| H | 5.36202200   | 4.31296800  | -2.26357500 |
| H | 2.07358700   | 2.62086200  | -4.43028500 |
| H | 1.33883700   | 1.44502600  | -2.40720200 |
| H | -1.86974600  | -4.06427700 | -0.41929300 |
| H | -1.84881900  | -5.40939500 | -2.47291700 |
| H | -3.38415200  | -2.07105000 | -4.67911200 |
| H | -3.38564000  | -0.71494400 | -2.63328500 |
| H | 3.60231200   | 5.21787400  | 5.07358300  |
| H | 1.85512900   | 5.43618800  | 4.97459500  |
| H | 2.53202500   | 4.06994100  | 5.87815400  |
| H | 5.29275200   | 4.35336600  | -4.81110400 |
| H | 3.81637600   | 3.83570900  | -5.64321100 |
| H | 3.83537800   | 5.34014200  | -4.72046500 |
| H | -3.60141300  | -5.21953300 | -5.07260700 |
| H | -2.53374600  | -4.06990300 | -5.87827500 |
| H | -1.85380500  | -5.43509900 | -4.97541600 |
| H | -5.29262700  | -4.35009000 | 4.81305000  |
| H | -3.83869900  | -5.34152500 | 4.71855000  |
| H | -3.81304100  | -3.83817200 | 5.64297100  |
| H | -4.62202400  | -3.15159100 | 0.23243500  |
| H | -5.36172600  | -4.31329900 | 2.26352500  |
| H | -2.07341800  | -2.62098700 | 4.43027100  |
| H | -1.33872200  | -1.44509800 | 2.40719200  |
| H | 8.41325800   | -4.73644000 | 0.28392400  |
| H | 10.58108900  | -3.59097000 | -0.09384200 |
| H | 14.84650300  | -1.12240900 | -1.83600900 |
| H | 12.21808500  | 2.52541600  | 0.37634100  |
| H | -8.41307700  | 4.73635700  | -0.28199900 |
| H | -10.58085500 | 3.59084700  | 0.09485100  |
| H | -14.84659900 | 1.12233100  | 1.83590500  |
| H | -12.21883000 | -2.52509100 | -0.37789400 |
| O | 5.59988400   | -4.34896900 | 0.27929000  |
| O | -5.59971700  | 4.34884700  | -0.27752300 |
| C | 5.93946000   | -5.72814400 | 0.28824700  |
| C | -5.93928100  | 5.72803300  | -0.28529200 |
| H | 4.99513600   | -6.27076800 | 0.29350600  |
| H | 6.51115700   | -5.99622600 | -0.60686800 |
| H | 6.51373200   | -5.98300900 | 1.18547200  |
| H | -6.51085800  | 5.99537200  | 0.61012200  |
| H | -4.99495300  | 6.27065000  | -0.29023400 |
| H | -6.51367300  | 5.98364900  | -1.18222700 |
| F | -15.76890300 | -1.33556600 | 2.06658400  |
| F | -14.34390400 | -3.23988300 | 0.89638900  |
| F | 15.76826100  | 1.33554900  | -2.06783200 |
| F | 14.34292400  | 3.24010200  | -0.89840000 |

## m-ITIC

|     |             |             |             |
|-----|-------------|-------------|-------------|
| 0 1 |             |             |             |
| C   | -1.15301600 | 0.88298000  | -0.06132100 |
| C   | -1.36819000 | -0.51610300 | -0.03340900 |
| C   | -0.30748400 | -1.42707000 | -0.01338200 |
| C   | 0.97615700  | -0.91387100 | -0.03054100 |
| C   | 1.19139400  | 0.48531000  | -0.05119800 |
| C   | 0.13066800  | 1.39636600  | -0.06265600 |
| C   | 2.30344200  | -1.68473200 | -0.00302300 |
| C   | 3.28283000  | -0.52551200 | -0.00272500 |
| C   | 2.61898100  | 0.68461500  | -0.04587000 |
| C   | -2.48063600 | 1.65424000  | -0.06055600 |
| C   | -3.45983900 | 0.49540200  | -0.02130600 |
| C   | -2.79573800 | -0.71529800 | -0.02140400 |
| C   | -4.85340200 | 0.30954200  | -0.02129200 |
| C   | -5.22074500 | -1.05234800 | -0.00991300 |
| S   | -3.82682400 | -2.10417800 | -0.01514000 |
| S   | -6.24257900 | 1.31435700  | -0.01762700 |
| C   | -7.31854600 | -0.09318700 | 0.00563100  |
| C   | -6.59407000 | -1.28619800 | 0.00394400  |
| C   | 4.67625500  | -0.34028100 | -0.01461500 |

|   |              |             |             |
|---|--------------|-------------|-------------|
| C | 5.04450000   | 1.02077100  | -0.05533100 |
| S | 3.65076200   | 2.07227800  | -0.09404600 |
| S | 6.06482600   | -1.34552700 | 0.01717400  |
| C | 7.14172300   | 0.06082800  | -0.02010400 |
| C | 6.41814900   | 1.25370100  | -0.05945100 |
| C | -2.72932600  | 2.44330400  | -1.35496300 |
| C | -2.53005400  | 2.53439900  | 1.19414200  |
| C | 2.35044900   | -2.52649500 | 1.27789000  |
| C | 2.55430500   | -2.51333600 | -1.27203800 |
| C | -8.70460300  | 0.19983800  | 0.00376000  |
| C | 8.52730900   | -0.23365300 | -0.02861800 |
| C | -9.83313100  | -0.58987200 | 0.05287900  |
| C | 9.65651400   | 0.55619000  | -0.01407500 |
| C | 11.02870800  | 0.05154700  | -0.03254100 |
| C | 11.93305600  | 1.20313100  | 0.17513900  |
| C | 11.16097000  | 2.37080300  | 0.24129700  |
| C | 9.73053400   | 2.03237400  | 0.10766000  |
| C | -11.20653100 | -0.08749500 | 0.03873300  |
| C | -12.10781700 | -1.23877500 | 0.26229600  |
| C | -11.33292600 | -2.40347100 | 0.34356100  |
| C | -9.90380800  | -2.06378800 | 0.20136600  |
| C | 13.32053800  | 1.29782200  | 0.29645200  |
| C | 13.88670400  | 2.55974300  | 0.47590300  |
| C | 13.10302300  | 3.71471900  | 0.53198100  |
| C | 11.71815400  | 3.62656300  | 0.41390600  |
| C | -13.49494600 | -1.33563600 | 0.38682400  |
| C | -14.05751500 | -2.59637900 | 0.58475500  |
| C | -13.27075300 | -3.74837700 | 0.65660800  |
| C | -11.88634600 | -3.65812600 | 0.53528600  |
| C | -2.05086000  | 2.13759800  | -2.53609200 |
| C | -2.33449900  | 2.79396900  | -3.73700800 |
| C | -3.33316500  | 3.77060300  | -3.74342400 |
| C | -4.02236300  | 4.08177600  | -2.57601900 |
| C | -3.72477300  | 3.42522300  | -1.38625600 |
| C | -3.08207200  | 2.06576400  | 2.38576700  |
| C | -3.04286100  | 2.85684400  | 3.53257300  |
| C | -2.45229600  | 4.11320600  | 3.50222200  |
| C | -1.88960400  | 4.60441900  | 2.31870800  |
| C | -1.93902400  | 3.80315700  | 1.17824600  |
| C | 1.76461500   | -3.79659700 | 1.30122400  |
| C | 1.72935200   | -4.52686900 | 2.48351200  |
| C | 2.27854600   | -4.00474700 | 3.65121400  |
| C | 2.87233300   | -2.74143400 | 3.65137200  |
| C | 2.89412100   | -2.01503600 | 2.45635000  |
| C | 3.55936000   | -3.48458500 | -1.26975700 |
| C | 3.89303700   | -4.20263200 | -2.42116500 |
| C | 3.18657600   | -3.93681200 | -3.59633500 |
| C | 2.18358000   | -2.97292400 | -3.61398800 |
| C | 1.86800000   | -2.25941300 | -2.46177800 |
| C | -1.56126200  | 2.47209200  | -4.98538300 |
| C | -1.25661600  | 5.96737600  | 2.27970000  |
| C | 3.49940500   | -2.17853800 | 4.89614400  |
| C | 4.99952600   | -5.21934600 | -2.38848500 |
| O | 8.82019700   | 2.84758800  | 0.11468300  |
| O | -8.99202500  | -2.87724800 | 0.21978000  |
| C | 11.45810400  | -1.24314200 | -0.24897700 |
| C | -11.64090000 | 1.20513800  | -0.18022300 |
| C | -13.01393900 | 1.58526100  | -0.16822300 |
| N | -14.11663400 | 1.95679300  | -0.16906500 |
| C | -10.79192700 | 2.31241300  | -0.46786100 |
| N | -10.14992700 | 3.25223400  | -0.71185000 |
| C | 12.83002900  | -1.62719300 | -0.24140600 |
| N | 13.93196000  | -2.00094000 | -0.24502400 |
| C | 10.60314000  | -2.34666600 | -0.53358000 |
| N | 9.95471300   | -3.28234500 | -0.77653000 |
| H | -0.48710700  | -2.49733900 | 0.01830100  |
| H | 0.31035100   | 2.46705100  | -0.06860500 |
| H | -7.08852800  | -2.24856100 | 0.01448300  |
| H | 6.91343100   | 2.21531200  | -0.08779800 |
| H | -8.89596000  | 1.26821200  | -0.03325900 |
| H | 8.71786400   | -1.30281500 | -0.03682300 |
| H | 13.96441400  | 0.42911800  | 0.26096900  |
| H | 14.96475300  | 2.64153600  | 0.57410200  |
| H | 13.57829400  | 4.68088600  | 0.66986900  |
| H | 11.08035300  | 4.50392300  | 0.45509000  |
| H | -14.14152000 | -0.46956500 | 0.33938700  |
| H | -15.13526400 | -2.67957000 | 0.68508800  |
| H | -13.74324800 | -4.71371700 | 0.80907700  |
| H | -11.24596900 | -4.53297700 | 0.58820800  |
| H | -1.28032200  | 1.37157600  | -2.52930000 |

|   |             |             |             |
|---|-------------|-------------|-------------|
| H | -3.57145300 | 4.28902700  | -4.66880100 |
| H | -4.79915100 | 4.84086000  | -2.59009200 |
| H | -4.25769000 | 3.68908300  | -0.47740500 |
| H | -3.54079600 | 1.08247300  | 2.42522400  |
| H | -3.47984800 | 2.48514200  | 4.45500200  |
| H | -2.42893700 | 4.72400500  | 4.40141800  |
| H | -1.52134400 | 4.18549300  | 0.25015800  |
| H | 1.34833400  | -4.21944700 | 0.39178700  |
| H | 1.27095200  | -5.51167300 | 2.49356700  |
| H | 2.24859300  | -4.58372400 | 4.57079100  |
| H | 3.34380200  | -1.02520200 | 2.45328800  |
| H | 4.08629700  | -3.70599000 | -0.34450100 |
| H | 3.42300200  | -4.49101300 | -4.50111800 |
| H | 1.63806000  | -2.77642900 | -4.53265100 |
| H | 1.08362200  | -1.51005000 | -2.49040700 |
| H | -1.17095900 | 1.45105000  | -4.96272800 |
| H | -2.18313700 | 2.58145500  | -5.87822800 |
| H | -0.70493400 | 3.14703300  | -5.10113800 |
| H | -1.98951600 | 6.74939400  | 2.50600400  |
| H | -0.45654600 | 6.05320500  | 3.02257700  |
| H | -0.82961100 | 6.18261000  | 1.29710100  |
| H | 3.06188800  | -2.61788300 | 5.79652200  |
| H | 4.57589000  | -2.38509700 | 4.92000400  |
| H | 3.37654600  | -1.09309700 | 4.94990600  |
| H | 5.98044200  | -4.73013700 | -2.40259400 |
| H | 4.95662900  | -5.82764400 | -1.48008000 |
| H | 4.95216700  | -5.88885800 | -3.25111100 |

## IT-DM

0 1

|   |             |             |             |
|---|-------------|-------------|-------------|
| C | 1.01917300  | 0.95060700  | 0.05453300  |
| C | 1.30308400  | -0.43625700 | 0.05599100  |
| C | 0.28871600  | -1.39876800 | 0.05125000  |
| C | -1.01906900 | -0.95024900 | 0.05702400  |
| C | -1.30299400 | 0.43660700  | 0.05395300  |
| C | -0.28861900 | 1.39909900  | 0.04668700  |
| C | -2.30707400 | -1.78638500 | 0.04337700  |
| C | -3.34232600 | -0.67642700 | 0.03070000  |
| C | -2.73892600 | 0.56507500  | 0.05062000  |
| C | 2.30722100  | 1.78666700  | 0.03883000  |
| C | 3.34245000  | 0.67665200  | 0.03026200  |
| C | 2.73901000  | -0.56476300 | 0.05383900  |
| C | -2.32296300 | -2.64188500 | -1.22801900 |
| C | -2.50492500 | -2.61459500 | 1.32067100  |
| C | -1.66651300 | -3.87727900 | -1.25484600 |
| C | -1.60430200 | -4.62615400 | -2.42348500 |
| C | -2.19744900 | -4.17505200 | -3.60696800 |
| C | -2.84792500 | -2.94057900 | -3.57580900 |
| C | -2.91030200 | -2.18447700 | -2.40829100 |
| C | -3.43948900 | -3.65527500 | 1.34141800  |
| C | -3.69944800 | -4.35859100 | 2.51216500  |
| C | -3.03644100 | -4.05280500 | 3.70387100  |
| C | -2.10945500 | -3.00848100 | 3.67967200  |
| C | -1.84753600 | -2.29924100 | 2.51134000  |
| C | 2.50446200  | 2.61906900  | 1.31348600  |
| C | 2.32375100  | 2.63811400  | -1.23528000 |
| C | 1.84663800  | 2.30752000  | 2.50492900  |
| C | 2.10807500  | 3.02055300  | 3.67104400  |
| C | 3.03500300  | 4.06501200  | 3.69220500  |
| C | 3.69839800  | 4.36700800  | 2.49976300  |
| C | 3.43889500  | 3.65989900  | 1.33118900  |
| C | 2.91248300  | 2.17750500  | -2.41357600 |
| C | 2.85055700  | 2.92997200  | -3.58350800 |
| C | 2.19918200  | 4.16381100  | -3.61908800 |
| C | 1.60472300  | 4.61819800  | -2.43748200 |
| C | 1.66649400  | 3.87301000  | -1.26650600 |
| C | 3.29204700  | 4.85370200  | 4.94482600  |
| C | 2.16068500  | 4.99065700  | -4.87294600 |
| C | -3.29400400 | -4.83750700 | 4.95888800  |
| C | -2.15877400 | -5.00584200 | -4.85820700 |
| C | -4.74371600 | -0.56001900 | 0.03808000  |
| C | -5.17850200 | 0.78112100  | 0.05500200  |
| S | -3.83856200 | 1.90052400  | 0.07530100  |

|   |              |             |             |
|---|--------------|-------------|-------------|
| C | 4.74383500   | 0.56022400  | 0.03889300  |
| C | 5.17856500   | -0.78086500 | 0.06047100  |
| S | 3.83858500   | -1.90015300 | 0.08359300  |
| S | -6.08221100  | -1.63213100 | 0.01561100  |
| C | -7.22675800  | -0.27946000 | 0.02507100  |
| C | -6.56241200  | 0.94662300  | 0.04903700  |
| S | 6.08238400   | 1.63222000  | 0.01377900  |
| C | 7.22686700   | 0.27955200  | 0.02824500  |
| C | 6.56247800   | -0.94642300 | 0.05591500  |
| C | -8.59812400  | -0.64163300 | 0.01444900  |
| C | 8.59827900   | 0.64155800  | 0.01743600  |
| C | -9.76432800  | 0.09035900  | 0.00144700  |
| C | 9.76434800   | -0.09066600 | 0.00629800  |
| C | -11.11310300 | -0.48024300 | -0.01340900 |
| C | -12.07030000 | 0.64027000  | -0.09671000 |
| C | -11.35623400 | 1.84267500  | -0.10050300 |
| C | -9.91103600  | 1.56799300  | -0.03330000 |
| C | 11.11317300  | 0.47975800  | -0.00939000 |
| C | 12.07008600  | -0.64071200 | -0.09612500 |
| C | 11.35593700  | -1.84307700 | -0.09859900 |
| C | 9.91089600   | -1.56833300 | -0.02803900 |
| C | 13.46256100  | -0.68895800 | -0.16699400 |
| C | 14.11593600  | -1.92277200 | -0.23705000 |
| C | 13.37654900  | -3.12999300 | -0.23421900 |
| C | 11.98398100  | -3.07364700 | -0.16388700 |
| C | -13.46296800 | 0.68851500  | -0.16376000 |
| C | -14.11657600 | 1.92233000  | -0.23157700 |
| C | -13.37722700 | 3.12957300  | -0.23047800 |
| C | -11.98448200 | 3.07324400  | -0.16382100 |
| O | -9.03813000  | 2.42397900  | -0.01669900 |
| O | 9.03799800   | -2.42427500 | -0.00918100 |
| C | -11.48001400 | -1.81109600 | 0.05378300  |
| C | 11.48028800  | 1.81036900  | 0.06113200  |
| C | 14.07818200  | -4.45243800 | -0.30690700 |
| C | -14.07909200 | 4.45201100  | -0.30101900 |
| C | 15.61382600  | -1.95957300 | -0.31600100 |
| C | -15.61468900 | 1.95909400  | -0.30622700 |
| C | 12.83418400  | 2.25276500  | 0.03468100  |
| N | 13.91793200  | 2.67640000  | 0.01698700  |
| C | 10.57610600  | 2.90428500  | 0.18090700  |
| N | 9.88879700   | 3.83848000  | 0.28213900  |
| C | -12.83391600 | -2.25355100 | 0.02843700  |
| N | -13.91762200 | -2.67732500 | 0.01145100  |
| C | -10.57562900 | -2.90546400 | 0.16774200  |
| N | -9.88818100  | -3.84008900 | 0.26396800  |
| H | 0.52159900   | -2.45912900 | 0.04085400  |
| H | -0.52152700  | 2.45941200  | 0.03284000  |
| H | -1.20929800  | -4.26569500 | -0.34906900 |
| H | -1.08713200  | -5.58271500 | -2.41533300 |
| H | -3.31673300  | -2.56024600 | -4.48009800 |
| H | -3.41933800  | -1.22517500 | -2.42352200 |
| H | -3.96106600  | -3.93111500 | 0.42915400  |
| H | -4.43244000  | -5.16152500 | 2.49773300  |
| H | -1.58093900  | -2.74196300 | 4.59189200  |
| H | -1.12292000  | -1.49107100 | 2.53296400  |
| H | 1.12207100   | 1.49937200  | 2.52888700  |
| H | 1.57924900   | 2.75696100  | 4.58393300  |
| H | 4.43134200   | 5.16993900  | 2.48301800  |
| H | 3.96073900   | 3.93283800  | 0.41820600  |
| H | 3.42226100   | 1.21855000  | -2.42542000 |
| H | 3.32047500   | 2.54721000  | -4.48619400 |
| H | 1.08688600   | 5.57442300  | -2.43272500 |
| H | 1.20830300   | 4.26392200  | -0.36230000 |
| H | 3.10892400   | 4.25261700  | 5.83967100  |
| H | 4.32225100   | 5.21857100  | 4.98168800  |
| H | 2.63460500   | 5.72956900  | 4.99967900  |
| H | 2.30373100   | 4.37261600  | -5.76326400 |
| H | 1.20880300   | 5.52032000  | -4.97266100 |
| H | 2.95369000   | 5.74776800  | -4.86817300 |
| H | -4.32500500  | -5.19993200 | 4.99777200  |
| H | -2.63853800  | -5.71474500 | 5.01540900  |
| H | -3.10861700  | -4.23443200 | 5.85191700  |
| H | -1.20931200  | -5.54069100 | -4.95299600 |
| H | -2.95574300  | -5.75879100 | -4.85399100 |
| H | -2.29556500  | -4.38975600 | -5.75087200 |
| H | -7.10516700  | 1.88252500  | 0.05973600  |
| H | 7.10519100   | -1.88230800 | 0.06996400  |
| H | -8.73413500  | -1.71887700 | 0.00973900  |
| H | 8.73447700   | 1.71877200  | 0.01011200  |
| H | 14.06487200  | 0.21053800  | -0.17234700 |

|   |              |             |             |
|---|--------------|-------------|-------------|
| H | 11.38878300  | -3.98262000 | -0.16075800 |
| H | -14.06529300 | -0.21097300 | -0.16760900 |
| H | -11.38929700 | 3.98222900  | -0.16196600 |
| H | 14.68170100  | -4.53337400 | -1.21812000 |
| H | 14.76388300  | -4.58597300 | 0.53756000  |
| H | 13.36427400  | -5.27850100 | -0.29825400 |
| H | -14.68481700 | 4.53319700  | -1.21074500 |
| H | -14.76274900 | 4.58524900  | 0.54514800  |
| H | -13.36520600 | 5.27810900  | -0.29385500 |
| H | 16.03579500  | -0.95273300 | -0.30862700 |
| H | 16.04268800  | -2.51424700 | 0.52629900  |
| H | 15.95127800  | -2.46303600 | -1.22910700 |
| H | -16.03657400 | 0.95222400  | -0.29821600 |
| H | -16.04116400 | 2.51325900  | 0.53762200  |
| H | -15.95478800 | 2.46306100  | -1.21806800 |

## IT-M

0 1

|   |              |             |             |
|---|--------------|-------------|-------------|
| C | 1.03402400   | 0.93419700  | 0.01519600  |
| C | 1.29600100   | -0.45703500 | 0.01790900  |
| C | 0.26643500   | -1.40322700 | 0.01368100  |
| C | -1.03394400  | -0.93379700 | 0.01884400  |
| C | -1.29593300  | 0.45743100  | 0.01475000  |
| C | -0.26636100  | 1.40359100  | 0.00681500  |
| C | -2.33482600  | -1.74961600 | 0.00570500  |
| C | -3.35236000  | -0.62352600 | -0.00601900 |
| C | -2.72962500  | 0.60859900  | 0.01239400  |
| C | 2.33493700   | 1.74993100  | -0.00086100 |
| C | 3.35246700   | 0.62378800  | -0.00662500 |
| C | 2.72968800   | -0.60822000 | 0.01731500  |
| C | -2.36398000  | -2.60426200 | -1.26611200 |
| C | -2.54522200  | -2.57531100 | 1.28263000  |
| C | -1.72561100  | -3.84908700 | -1.29328700 |
| C | -1.67408100  | -4.59837600 | -2.46212300 |
| C | -2.26050600  | -4.13827900 | -3.64553200 |
| C | -2.89322800  | -2.89465300 | -3.61390600 |
| C | -2.94470500  | -2.13801900 | -2.44614600 |
| C | -3.49463700  | -3.60241100 | 1.30248600  |
| C | -3.76500200  | -4.30254300 | 2.47286100  |
| C | -3.09813900  | -4.00685800 | 3.66489500  |
| C | -2.15642000  | -2.97568300 | 3.64163000  |
| C | -1.88392600  | -2.26977100 | 2.47376800  |
| C | 2.54443800   | 2.58153900  | 1.27238700  |
| C | 2.36500400   | 2.59881800  | -1.27649300 |
| C | 1.88251300   | 2.28139500  | 2.46453800  |
| C | 2.15430700   | 2.99269000  | 3.62930100  |
| C | 3.09590700   | 4.02404800  | 3.64835100  |
| C | 3.76334700   | 4.31438800  | 2.45531500  |
| C | 3.49367100   | 3.60888200  | 1.28802300  |
| C | 2.94758700   | 2.12783800  | -2.45371900 |
| C | 2.89683800   | 2.87923700  | -3.62490400 |
| C | 2.26304000   | 4.12212600  | -3.66285900 |
| C | 1.67485200   | 4.58702300  | -2.48219300 |
| C | 1.72568000   | 3.84300600  | -1.30997900 |
| C | 3.36390800   | 4.81143500  | 4.89948500  |
| C | 2.23638100   | 4.94720800  | -4.91817200 |
| C | -3.36680300  | -4.78853400 | 4.91946600  |
| C | -2.23325500  | -4.96903900 | -4.89707800 |
| C | -4.75144800  | -0.48525400 | 0.00542000  |
| C | -5.16539400  | 0.86280600  | 0.02332000  |
| S | -3.80795800  | 1.96130900  | 0.03933500  |
| C | 4.75154900   | 0.48552600  | 0.00653100  |
| C | 5.16542500   | -0.86244200 | 0.03139200  |
| S | 3.80795000   | -1.96081400 | 0.05180100  |
| S | -6.10573700  | -1.53683000 | -0.01083500 |
| C | -7.22962100  | -0.16688500 | 0.00347700  |
| C | -6.54629000  | 1.04946000  | 0.02302800  |
| S | 6.10590200   | 1.53695700  | -0.01405800 |
| C | 7.22970800   | 0.16704200  | 0.00766300  |
| C | 6.54631100   | -1.04915200 | 0.03293800  |
| C | -8.60529300  | -0.50912900 | 0.00139600  |
| C | 8.60542900   | 0.50908100  | 0.00497900  |
| C | -9.76193200  | 0.23918300  | 0.00258500  |
| C | 9.76188400   | -0.23950600 | 0.00887200  |
| C | -11.11848400 | -0.31205400 | 0.00020700  |
| C | -12.06182600 | 0.82237400  | -0.03916700 |
| C | -11.33169400 | 2.01678900  | -0.04118500 |



|   |              |             |             |
|---|--------------|-------------|-------------|
| C | -9.88713300  | 1.71736700  | -0.01283900 |
| C | 11.11851500  | 0.31148400  | 0.00504900  |
| C | 12.06156400  | -0.82295900 | -0.03977300 |
| C | 11.33128400  | -2.01729400 | -0.03973700 |
| C | 9.88685500   | -1.71772400 | -0.00607900 |
| C | 13.45653900  | -0.89337300 | -0.07950200 |
| C | 14.05942300  | -2.14689600 | -0.11437400 |
| C | 13.32476200  | -3.34402300 | -0.10835100 |
| C | 11.93016300  | -3.26402800 | -0.07274900 |
| C | -13.45697400 | 0.89269700  | -0.07280000 |
| C | -14.06013200 | 2.14617300  | -0.10413800 |
| C | -13.32556500 | 3.34337400  | -0.10060100 |
| C | -11.93083300 | 3.26348800  | -0.07094800 |
| O | -9.00309900  | 2.56140700  | -0.00734400 |
| O | 9.00276700   | -2.56167500 | 0.00276100  |
| C | -11.50425700 | -1.63860300 | 0.03921000  |
| C | 11.50453900  | 1.63778200  | 0.04918700  |
| C | 14.02968200  | -4.66764100 | -0.12396300 |
| C | -14.03071300 | 4.66691100  | -0.11244900 |
| C | 12.86579800  | 2.05766800  | 0.03942700  |
| N | 13.95712900  | 2.46161300  | 0.03348800  |
| C | 10.61527400  | 2.74810100  | 0.11867400  |
| N | 9.94003500   | 3.69459800  | 0.17795100  |
| C | -12.86548700 | -2.05863500 | 0.03167500  |
| N | -13.95674400 | -2.46280500 | 0.02733400  |
| C | -10.61476600 | -2.74929900 | 0.09915800  |
| N | -9.93938800  | -3.69617700 | 0.15026000  |
| H | 0.48203200   | -2.46718100 | 0.00454500  |
| H | -0.48198500  | 2.46747900  | -0.00753500 |
| H | -1.27430000  | -4.24438800 | -0.38754900 |
| H | -1.17078800  | -5.56230600 | -2.45423000 |
| H | -3.35654600  | -2.50735900 | -4.51806500 |
| H | -3.43975900  | -1.17140700 | -2.46125200 |
| H | -4.01974200  | -3.87039600 | 0.38989000  |
| H | -4.50925700  | -5.09502400 | 2.45779300  |
| H | -1.62456300  | -2.71715700 | 4.55420300  |
| H | -1.14782900  | -1.47204400 | 2.49606600  |
| H | 1.14648600   | 1.48370100  | 2.49009500  |
| H | 1.62199200   | 2.73830700  | 4.54276800  |
| H | 4.50751500   | 5.10688300  | 2.43702900  |
| H | 4.01915000   | 3.87278000  | 0.37445700  |
| H | 3.44352500   | 1.16161800  | -2.46392900 |
| H | 3.36160600   | 2.48835500  | -4.52677300 |
| H | 1.17074300   | 5.55055500  | -2.47917400 |
| H | 1.27304700   | 4.24197300  | -0.40651500 |
| H | 3.17982400   | 4.21223200  | 5.79541300  |
| H | 4.39691500   | 5.16863000  | 4.93203600  |
| H | 2.71311000   | 5.69210700  | 4.95647100  |
| H | 2.37107400   | 4.32571600  | -5.80737700 |
| H | 1.29194700   | 5.48981400  | -5.01905800 |
| H | 3.03977100   | 5.69329100  | -4.91443300 |
| H | -4.39937900  | -5.14692400 | 4.95236700  |
| H | -2.71490300  | -5.66804200 | 4.98158000  |
| H | -3.18469700  | -4.18477200 | 5.81273700  |
| H | -1.28970700  | -5.51391500 | -4.99389400 |
| H | -3.03810400  | -5.71353800 | -4.89137900 |
| H | -2.36524100  | -4.35130000 | -5.78930100 |
| H | -7.07391700  | 1.99391100  | 0.03572100  |
| H | 7.07387800   | -1.99355900 | 0.05058400  |
| H | -8.75670000  | -1.58432900 | -0.00528300 |
| H | 8.75709200   | 1.58422100  | -0.00582400 |
| H | 14.08038500  | -0.00946400 | -0.08806400 |
| H | 15.14438300  | -2.20066800 | -0.14893600 |
| H | 11.31356400  | -4.15856500 | -0.07219300 |
| H | -14.08078900 | 0.00875200  | -0.07902300 |
| H | -15.14524200 | 2.19985300  | -0.13379700 |
| H | -11.31433400 | 4.15809100  | -0.07240700 |
| H | 14.48700900  | -4.87257300 | 0.85074200  |
| H | 13.34050200  | -5.48485600 | -0.34769500 |
| H | 14.83370800  | -4.67911900 | -0.86569200 |
| H | -14.83639400 | 4.67948100  | -0.85237100 |
| H | -14.48593600 | 4.87015900  | 0.86359200  |
| H | -13.34217100 | 5.48460100  | -0.33639700 |

ITCPTC

|     |              |             |             |
|-----|--------------|-------------|-------------|
| 0 1 |              |             |             |
| C   | -1.27988400  | -0.50047900 | 0.06082800  |
| C   | -1.06424400  | 0.89894800  | 0.06401300  |
| C   | -0.21939300  | -1.41201700 | 0.05738300  |
| C   | 1.06425600   | -0.89893000 | 0.06414400  |
| C   | 1.27989600   | 0.50049900  | 0.06073400  |
| C   | 0.21940500   | 1.41203700  | 0.05715200  |
| C   | 2.39103700   | -1.67133700 | 0.04688900  |
| C   | 3.37053600   | -0.51232700 | 0.02368400  |
| C   | 2.70740400   | 0.69904600  | 0.04811700  |
| C   | 4.76359300   | -0.32761100 | 0.01857200  |
| C   | 5.13266400   | 1.03438900  | 0.02981600  |
| S   | 3.73956300   | 2.08718800  | 0.06110400  |
| S   | 6.15080200   | -1.33422000 | -0.01530400 |
| C   | 7.22892600   | 0.07242200  | -0.01817800 |
| C   | 6.50551000   | 1.26672100  | 0.01000800  |
| C   | -2.39102400  | 1.67135300  | 0.04665500  |
| C   | -3.37052500  | 0.51233600  | 0.02361900  |
| C   | -2.70739100  | -0.69903100 | 0.04824100  |
| C   | -4.76358300  | 0.32761700  | 0.01857500  |
| C   | -5.13265000  | -1.03438300 | 0.03006100  |
| S   | -3.73954400  | -2.08717500 | 0.06149500  |
| S   | -6.15079400  | 1.33421200  | -0.01547700 |
| C   | -7.22891600  | -0.07243200 | -0.01810400 |
| C   | -6.50549500  | -1.26672100 | 0.01028900  |
| C   | -2.63689500  | 2.48134800  | 1.32748100  |
| C   | -2.44014700  | 2.53227200  | -1.22017200 |
| C   | 2.63690600   | -2.48115300 | 1.32783300  |
| C   | 2.44016500   | -2.53245300 | -1.21979800 |
| C   | -3.62709600  | 3.46918900  | 1.34965200  |
| C   | -3.92692900  | 4.15364700  | 2.52213400  |
| C   | -3.25037400  | 3.88063900  | 3.71409000  |
| C   | -2.26826800  | 2.88786300  | 3.68866000  |
| C   | -1.96576700  | 2.19799900  | 2.51862800  |
| C   | -1.85602700  | 3.80326000  | -1.23171000 |
| C   | -1.82058600  | 4.56083800  | -2.39613800 |
| C   | -2.36972200  | 4.08270200  | -3.58988100 |
| C   | -2.94788600  | 2.81212000  | -3.57382000 |
| C   | -2.98287400  | 2.04747800  | -2.41104900 |
| C   | 3.62705000   | -3.46906300 | 1.35010500  |
| C   | 3.92688400   | -4.15336900 | 2.52266400  |
| C   | 3.25038800   | -3.88014100 | 3.71461700  |
| C   | 2.26835500   | -2.88731200 | 3.68908200  |
| C   | 1.96584800   | -2.19759000 | 2.51895500  |
| C   | 1.85580000   | -3.80335900 | -1.23118300 |
| C   | 1.82034300   | -4.56112300 | -2.39545800 |
| C   | 2.36973000   | -4.08329100 | -3.58923800 |
| C   | 2.94816900   | -2.81286300 | -3.57332000 |
| C   | 2.98314900   | -2.04799400 | -2.41066600 |
| C   | -3.55058400  | 4.64687000  | 4.97101500  |
| C   | -2.36280800  | 4.92077900  | -4.83677200 |
| C   | 3.55064100   | -4.64624700 | 4.97160800  |
| C   | 2.36260400   | -4.92165700 | -4.83593400 |
| C   | 8.61298700   | -0.22250700 | -0.04668700 |
| C   | -8.61297700  | 0.22249000  | -0.04659300 |
| C   | 9.74872100   | 0.56053200  | -0.05514900 |
| C   | -9.74872400  | -0.56053400 | -0.05497500 |
| C   | 11.11077600  | 0.02294800  | -0.08892500 |
| C   | 12.02308300  | 1.16721100  | -0.07429800 |
| C   | 11.26469800  | 2.37193400  | -0.03762600 |
| C   | 9.82899000   | 2.05089700  | -0.02612500 |
| C   | -11.11076900 | -0.02291900 | -0.08875500 |
| C   | -12.02309900 | -1.16716500 | -0.07433300 |
| C   | -11.26474100 | -2.37190500 | -0.03767200 |
| C   | -9.82902700  | -2.05089900 | -0.02598900 |
| C   | 13.37504500  | 1.39705500  | -0.08685000 |
| S   | 13.69148200  | 3.08834600  | -0.05316400 |
| C   | 12.02123400  | 3.50401900  | -0.02240700 |
| C   | -13.37506400 | -1.39698500 | -0.08705600 |
| S   | -13.69153400 | -3.08827400 | -0.05354400 |
| C   | -12.02129700 | -3.50397900 | -0.02262600 |
| O   | 8.91312200   | 2.85821000  | 0.00204100  |
| O   | -8.91318100  | -2.85823100 | 0.00227000  |
| C   | -11.54514500 | 1.28858300  | -0.13016600 |
| C   | 11.54517400  | -1.28853900 | -0.13055000 |
| C   | -10.70652300 | 2.43652000  | -0.15213200 |
| N   | -10.05868300 | 3.40369300  | -0.17170900 |
| C   | -12.93446900 | 1.59510200  | -0.15701900 |
| N   | -14.06838600 | 1.85616600  | -0.17908200 |
| C   | 10.70656200  | -2.43647400 | -0.15285900 |

|   |              |             |             |
|---|--------------|-------------|-------------|
| N | 10.05872100  | -3.40364100 | -0.17273900 |
| C | 12.93450400  | -1.59503400 | -0.15732700 |
| N | 14.06843600  | -1.85603800 | -0.17936200 |
| H | -0.39923200  | -2.48266600 | 0.04440700  |
| H | 0.39923700   | 2.48268600  | 0.04400200  |
| H | 7.00198700   | 2.22810700  | 0.01450100  |
| H | -7.00196100  | -2.22811200 | 0.01493900  |
| H | -4.16151500  | 3.71955300  | 0.43738700  |
| H | -4.70213900  | 4.91587600  | 2.50877500  |
| H | -1.72779700  | 2.64741800  | 4.60110200  |
| H | -1.19798200  | 1.43070400  | 2.53932100  |
| H | -1.43492000  | 4.21203000  | -0.31753200 |
| H | -1.35970900  | 5.54554200  | -2.37610600 |
| H | -3.38055500  | 2.40997900  | -4.48665900 |
| H | -3.43407300  | 1.05980500  | -2.43845500 |
| H | 4.16141600   | -3.71958400 | 0.43785100  |
| H | 4.70204400   | -4.91565200 | 2.50938200  |
| H | 1.72793400   | -2.64670400 | 4.60151000  |
| H | 1.19811200   | -1.43024400 | 2.53957200  |
| H | 1.43452500   | -4.21189100 | -0.31697400 |
| H | 1.35926900   | -5.54573500 | -2.37530300 |
| H | 3.38107900   | -2.41100200 | -4.48616400 |
| H | 3.43456100   | -1.06042300 | -2.43819900 |
| H | -2.91832200  | 5.53949900  | 5.04695800  |
| H | -4.59094600  | 4.98256600  | 4.99455700  |
| H | -3.36547500  | 4.04065400  | 5.86206000  |
| H | -1.46855400  | 5.54810400  | -4.89104600 |
| H | -2.40111400  | 4.29970900  | -5.73572700 |
| H | -3.23100200  | 5.58985600  | -4.86411700 |
| H | 2.92011700   | -5.54019800 | 5.04643500  |
| H | 4.59165200   | -4.97986900 | 4.99624900  |
| H | 3.36326900   | -4.04074800 | 5.86266000  |
| H | 1.46461000   | -5.54334400 | -4.89366700 |
| H | 2.40843000   | -4.30111000 | -5.73487700 |
| H | 3.22657300   | -5.59631400 | -4.85952500 |
| H | 8.80264600   | -1.29216400 | -0.06614000 |
| H | -8.80263200  | 1.29214700  | -0.06613900 |
| H | 14.20052000  | 0.70044600  | -0.11285700 |
| H | 11.70687500  | 4.53838900  | 0.00429100  |
| H | -14.20052500 | -0.70036100 | -0.11310400 |
| H | -11.70695900 | -4.53835600 | 0.00402800  |

## CHITIC

0 1

|   |             |             |             |
|---|-------------|-------------|-------------|
| C | -0.09044500 | -1.42532800 | 0.04642500  |
| C | 1.14148100  | -0.76424300 | 0.01254700  |
| C | 1.23357000  | 0.64784000  | -0.03683400 |
| C | 0.09044900  | 1.42531700  | -0.04676900 |
| C | -1.14147800 | 0.76423100  | -0.01289700 |
| C | -1.23356700 | -0.64785200 | 0.03648800  |
| C | -2.49222200 | 1.26583900  | -0.02546400 |
| C | -3.40324400 | 0.22762300  | -0.00645800 |
| C | -2.69592800 | -1.11467900 | 0.05301900  |
| C | 2.49222500  | -1.26584900 | 0.02512800  |
| C | 3.40324600  | -0.22763200 | 0.00613400  |
| C | 2.69592900  | 1.11466900  | -0.05335300 |
| C | -2.94688900 | -1.98442800 | -1.18384200 |
| C | -3.09393100 | -1.80945600 | 1.36259800  |
| C | 2.94688900  | 1.98444300  | 1.18348600  |
| C | 3.09393100  | 1.80942600  | -1.36295000 |
| C | -2.66051200 | -3.35333200 | -1.15707600 |
| C | -2.80859500 | -4.13473500 | -2.29690200 |
| C | -3.25098300 | -3.58277000 | -3.50292600 |
| C | -3.53045400 | -2.21506800 | -3.52548000 |
| C | -3.38060900 | -1.42729500 | -2.38788800 |
| C | -2.35982900 | -1.64381000 | 2.53829100  |
| C | -2.79137800 | -2.21166900 | 3.73364800  |
| C | -3.96863900 | -2.95959900 | 3.80030000  |
| C | -4.70550400 | -3.11452800 | 2.62263800  |
| C | -4.27780000 | -2.55256200 | 1.42553400  |
| C | 2.66052400  | 3.35334300  | 1.15669700  |
| C | 2.80861300  | 4.13476800  | 2.29651600  |
| C | 3.25099600  | 3.58282300  | 3.50254400  |
| C | 3.53044900  | 2.21511200  | 3.52512400  |
| C | 3.38059800  | 1.42732400  | 2.38755100  |
| C | 4.27780800  | 2.55249000  | -1.42591500 |

|    |              |             |             |
|----|--------------|-------------|-------------|
| C  | 4.70549800   | 3.11445600  | -2.62304000 |
| C  | 3.96860200   | 2.95956200  | -3.80066800 |
| C  | 2.79131600   | 2.21164300  | -3.73399100 |
| C  | 2.35979100   | 1.64379400  | -2.53863700 |
| S  | -3.19808200  | 2.84544800  | -0.05481500 |
| C  | -4.78372400  | 2.11544800  | -0.04744100 |
| C  | -4.72526200  | 0.70799000  | -0.01484100 |
| C  | -6.07989900  | 2.61371800  | -0.07174800 |
| C  | -7.04586500  | 1.59722500  | -0.05991700 |
| S  | -6.29637400  | -0.00143400 | -0.01446600 |
| S  | 3.19808700   | -2.84545900 | 0.05453900  |
| C  | 4.78372900   | -2.11545300 | 0.04722300  |
| C  | 4.72526500   | -0.70799600 | 0.01457900  |
| C  | 6.07990300   | -2.61372000 | 0.07160200  |
| C  | 7.04587000   | -1.59722700 | 0.05978900  |
| S  | 6.29637800   | 0.00143200  | 0.01424500  |
| C  | -8.41660500  | 1.94382700  | -0.08060500 |
| C  | 8.41660800   | -1.94382800 | 0.08058100  |
| C  | -9.58747300  | 1.21879600  | -0.07494500 |
| C  | 9.58747800   | -1.21880000 | 0.07500100  |
| C  | -10.94198700 | 1.75848000  | -0.09871800 |
| C  | -11.87551100 | 0.61107000  | -0.07338700 |
| C  | -11.13149300 | -0.57565900 | -0.03992900 |
| C  | -9.68950100  | -0.25100800 | -0.04027500 |
| C  | 10.94199100  | -1.75848000 | 0.09895600  |
| C  | 11.87551300  | -0.61106100 | 0.07403400  |
| C  | 11.13149800  | 0.57566600  | 0.04046300  |
| C  | 9.68950800   | 0.25100700  | 0.04041200  |
| C  | -13.26935600 | 0.53242100  | -0.07797000 |
| C  | -13.87255800 | -0.72225200 | -0.04943600 |
| C  | -13.10013800 | -1.88537200 | -0.01700200 |
| C  | -11.70922300 | -1.83114600 | -0.01163500 |
| C  | 13.26935600  | -0.53240300 | 0.07907900  |
| C  | 13.87255900  | 0.72227700  | 0.05085200  |
| C  | 13.10014200  | 1.88539400  | 0.01826500  |
| C  | 11.70922900  | 1.83116000  | 0.01245800  |
| O  | -8.77846200  | -1.06352900 | -0.01637500 |
| O  | 8.77847100   | 1.06352500  | 0.01631500  |
| C  | 11.33642500  | -3.08168400 | 0.13956800  |
| C  | -11.33641000 | 3.08167900  | -0.13959100 |
| C  | -4.41569300  | -3.59789100 | 5.08478300  |
| C  | -3.44677000  | -4.43808900 | -4.72244100 |
| C  | 3.44682400   | 4.43813800  | 4.72205600  |
| C  | 4.41554600   | 3.59788300  | -5.08517500 |
| Cl | -13.89384600 | -3.42637100 | 0.01733200  |
| Cl | 13.89384900  | 3.42640100  | -0.01569000 |
| C  | 12.69930800  | -3.49433800 | 0.15906600  |
| N  | 13.79510200  | -3.88550000 | 0.17641500  |
| C  | 10.44120700  | -4.18876000 | 0.16881500  |
| N  | 9.75129900   | -5.12595000 | 0.19452700  |
| C  | -12.69928900 | 3.49435600  | -0.15888000 |
| N  | -13.79507400 | 3.88555000  | -0.17603800 |
| C  | -10.44117400 | 4.18872600  | -0.16938300 |
| N  | -9.75124300  | 5.12588600  | -0.19555900 |
| H  | -0.14457000  | -2.50931900 | 0.07781100  |
| H  | 0.14457500   | 2.50930800  | -0.07814700 |
| H  | -2.33121800  | -3.81835600 | -0.23213300 |
| H  | -2.57904600  | -5.19646800 | -2.24714500 |
| H  | -3.87341200  | -1.75463000 | -4.44887300 |
| H  | -3.60189400  | -0.36540300 | -2.44408500 |
| H  | -1.44170700  | -1.06449300 | 2.52849600  |
| H  | -2.19817500  | -2.06731800 | 4.63348300  |
| H  | -5.63107600  | -3.68481600 | 2.64033500  |
| H  | -4.86827100  | -2.70610000 | 0.52661900  |
| H  | 2.33123600   | 3.81835700  | 0.23174800  |
| H  | 2.57907400   | 5.19650200  | 2.24674000  |
| H  | 3.87339600   | 1.75468900  | 4.44853000  |
| H  | 3.60186600   | 0.36543100  | 2.44376400  |
| H  | 4.86831200   | 2.70601600  | -0.52701900 |
| H  | 5.63108200   | 3.68472300  | -2.64075300 |
| H  | 2.19809300   | 2.06730100  | -4.63381500 |
| H  | 1.44165500   | 1.06449900  | -2.52881300 |
| H  | -6.35010400  | 3.66332400  | -0.09693600 |
| H  | 6.35010800   | -3.66332500 | 0.09683200  |
| H  | -8.52978400  | 3.02312200  | -0.10646000 |
| H  | 8.52978200   | -3.02312200 | 0.10649000  |
| H  | -13.90015000 | 1.41108700  | -0.10253000 |
| H  | -14.95410200 | -0.80054600 | -0.05233400 |
| H  | -11.09786800 | -2.72657900 | 0.01344400  |
| H  | 13.90014600  | -1.41106800 | 0.10377800  |

|   |             |             |             |
|---|-------------|-------------|-------------|
| H | 14.95410100 | 0.80057800  | 0.05411500  |
| H | 11.09787500 | 2.72659100  | -0.01272900 |
| H | -4.06436500 | -4.63444200 | 5.15135300  |
| H | -4.02298400 | -3.06361700 | 5.95406400  |
| H | -5.50652500 | -3.62047800 | 5.16032900  |
| H | -2.72672700 | -5.26069600 | -4.75351200 |
| H | -4.44891200 | -4.88285200 | -4.73259600 |
| H | -3.34015200 | -3.85436000 | -5.64079700 |
| H | 2.72750900  | 5.26139800  | 4.75258900  |
| H | 3.33913900  | 3.85462700  | 5.64042900  |
| H | 4.44937000  | 4.88197800  | 4.73275700  |
| H | 5.50639000  | 3.62250500  | -5.15981100 |
| H | 4.02459300  | 3.06230900  | -5.95445400 |
| H | 4.06225400  | 4.63370400  | -5.15272600 |

## Br-ITIC

|     |              |             |             |
|-----|--------------|-------------|-------------|
| 0 1 |              |             |             |
| C   | -0.15391100  | -1.41930700 | 0.05902700  |
| C   | 1.10631100   | -0.81437900 | 0.01680100  |
| C   | 1.26123500   | 0.59173900  | -0.04482200 |
| C   | 0.15391900   | 1.41929300  | -0.05961200 |
| C   | -1.10630400  | 0.81436500  | -0.01737700 |
| C   | -1.26122700  | -0.59175300 | 0.04423500  |
| C   | -2.43335200  | 1.37569700  | -0.03132300 |
| C   | -3.38965400  | 0.37936800  | -0.00155700 |
| C   | -2.74289500  | -0.99257300 | 0.06765700  |
| C   | 2.43335900   | -1.37570800 | 0.03079400  |
| C   | 3.38966300   | -0.37938000 | 0.00103100  |
| C   | 2.74290100   | 0.99255800  | -0.06823800 |
| C   | -3.03558600  | -1.86116700 | -1.16069500 |
| C   | -3.16834100  | -1.65741300 | 1.38418900  |
| C   | 3.03558800   | 1.86121000  | 1.16007200  |
| C   | 3.16834800   | 1.65734400  | -1.38479900 |
| C   | -2.80518100  | -3.24039000 | -1.12298100 |
| C   | -2.99118200  | -4.02515000 | -2.25483300 |
| C   | -3.41737400  | -3.46615800 | -3.46353600 |
| C   | -3.64110900  | -2.08850000 | -3.49700700 |
| C   | -3.45310400  | -1.29740000 | -2.36729400 |
| C   | -2.42618400  | -1.51154200 | 2.55744600  |
| C   | -2.87933700  | -2.04933200 | 3.75868700  |
| C   | -4.08656200  | -2.74698400 | 3.83370900  |
| C   | -4.83111800  | -2.88193700 | 2.65840700  |
| C   | -4.38228600  | -2.34949100 | 1.45553700  |
| C   | 2.80523700   | 3.24044800  | 1.12227200  |
| C   | 2.99124100   | 4.02526300  | 2.25407600  |
| C   | 3.41738000   | 3.46631900  | 3.46283100  |
| C   | 3.64105600   | 2.08866300  | 3.49638700  |
| C   | 3.45304900   | 1.29750000  | 2.36670800  |
| C   | 4.38232100   | 2.34936100  | -1.45618700 |
| C   | 4.83114800   | 2.88177400  | -2.65907700 |
| C   | 4.08655200   | 2.74684900  | -3.83435300 |
| C   | 2.87929300   | 2.04925200  | -3.75929100 |
| C   | 2.42614900   | 1.51149600  | -2.55803500 |
| S   | -3.06839600  | 2.98480300  | -0.07333400 |
| C   | -4.68499500  | 2.32630300  | -0.05649200 |
| C   | -4.68902100  | 0.91806700  | -0.01160800 |
| C   | -5.95790700  | 2.88158100  | -0.08289600 |
| C   | -6.96803900  | 1.90902200  | -0.06111100 |
| S   | -6.28978900  | 0.27902400  | -0.00279900 |
| S   | 3.06839800   | -2.98481400 | 0.07289200  |
| C   | 4.68500000   | -2.32631500 | 0.05609600  |
| C   | 4.68902900   | -0.91808100 | 0.01114500  |
| C   | 5.95790800   | -2.88159300 | 0.08264100  |
| C   | 6.96804300   | -1.90903700 | 0.06088900  |
| S   | 6.28979800   | -0.27904100 | 0.00242900  |
| C   | -8.32243300  | 2.31492800  | -0.08296600 |
| C   | 8.32243600   | -2.31494200 | 0.08286300  |
| C   | -9.52346700  | 1.64086000  | -0.07284100 |
| C   | 9.52347000   | -1.64087400 | 0.07283400  |
| C   | -10.85364300 | 2.23782600  | -0.10062900 |
| C   | -11.83533700 | 1.13114500  | -0.08146000 |
| C   | -11.14247300 | -0.08616000 | -0.04294400 |
| C   | -9.68816000  | 0.17672300  | -0.03514400 |
| C   | 10.85364300  | -2.23783800 | 0.10082000  |
| C   | 11.83533400  | -1.13114600 | 0.08219600  |
| C   | 11.14247400  | 0.08615800  | 0.04358900  |
| C   | 9.68816600   | -0.17673300 | 0.03529300  |

|    |              |             |             |
|----|--------------|-------------|-------------|
| C  | -13.23131100 | 1.11224200  | -0.09512700 |
| C  | -13.88701500 | -0.11613500 | -0.07033400 |
| C  | -13.16551100 | -1.31052300 | -0.03245200 |
| C  | -11.77421600 | -1.31560200 | -0.01790700 |
| C  | 13.23130200  | -1.11223500 | 0.09641500  |
| C  | 13.88700600  | 0.11615000  | 0.07203900  |
| C  | 13.16550700  | 1.31053700  | 0.03402100  |
| C  | 11.77421800  | 1.31560800  | 0.01894500  |
| O  | -8.81264400  | -0.67369500 | -0.00422200 |
| O  | 8.81265500   | 0.67368200  | 0.00416800  |
| C  | 11.19139800  | -3.57677700 | 0.13745800  |
| C  | -11.19139300 | 3.57675600  | -0.13764700 |
| C  | -4.55811300  | -3.35394200 | 5.12459500  |
| C  | -3.65471200  | -4.32366600 | -4.67409800 |
| C  | 3.65467700   | 4.32393100  | 4.67332700  |
| C  | 4.55806700   | 3.35378400  | -5.12526300 |
| Br | -14.10021300 | -2.94573000 | -0.00050700 |
| Br | 14.10021200  | 2.94575300  | 0.00264200  |
| C  | 12.53531300  | -4.04725300 | 0.16263700  |
| N  | 13.61322700  | -4.48508100 | 0.18448700  |
| C  | 10.24971400  | -4.64485900 | 0.15471900  |
| N  | 9.52035400   | -5.55191200 | 0.17030700  |
| C  | -12.53530900 | 4.04724200  | -0.16257400 |
| N  | -13.61321400 | 4.48510400  | -0.18423100 |
| C  | -10.24969900 | 4.64481700  | -0.15564300 |
| N  | -9.52034100  | 5.55186100  | -0.17182000 |
| H  | -0.25643400  | -2.49936000 | 0.10029500  |
| H  | 0.25644200   | 2.49934700  | -0.10087100 |
| H  | -2.49009000  | -3.71002500 | -0.19542000 |
| H  | -2.80490600  | -5.09489400 | -2.19669600 |
| H  | -3.97015600  | -1.62259200 | -4.42271500 |
| H  | -3.63148600  | -0.22795200 | -2.43184100 |
| H  | -1.48455900  | -0.97139700 | 2.54131900  |
| H  | -2.27936200  | -1.92108500 | 4.65648400  |
| H  | -5.77976800  | -3.41271700 | 2.68262600  |
| H  | -4.98011800  | -2.48636800 | 0.55876600  |
| H  | 2.49019200   | 3.71004000  | 0.19467300  |
| H  | 2.80501100   | 5.09501300  | 2.19586900  |
| H  | 3.97006400   | 1.62279800  | 4.42212900  |
| H  | 3.63138800   | 0.22804900  | 2.43132400  |
| H  | 4.98018600   | 2.48622200  | -0.55943500 |
| H  | 5.77982400   | 3.41250400  | -2.68332800 |
| H  | 2.27928800   | 1.92102000  | -4.65707000 |
| H  | 1.48450100   | 0.97139100  | -2.54187700 |
| H  | -6.18078100  | 3.94196500  | -0.11661900 |
| H  | 6.18077700   | -3.94197600 | 0.11643500  |
| H  | -8.38902700  | 3.39792200  | -0.11614100 |
| H  | 8.38902600   | -3.39793400 | 0.11609700  |
| H  | -13.82425800 | 2.01676000  | -0.12435600 |
| H  | -14.97074500 | -0.14701800 | -0.08055900 |
| H  | -11.20187200 | -2.23618300 | 0.01152700  |
| H  | 13.82424400  | -2.01675300 | 0.12577400  |
| H  | 14.97073200  | 0.14704100  | 0.08270400  |
| H  | 11.20187900  | 2.23619000  | -0.01058600 |
| H  | -4.25583900  | -4.40539700 | 5.19776800  |
| H  | -4.13729600  | -2.83230700 | 5.98835700  |
| H  | -5.64851700  | -3.32443100 | 5.20414600  |
| H  | -2.96296400  | -5.17021600 | -4.70629900 |
| H  | -4.67114800  | -4.73480800 | -4.67005900 |
| H  | -3.53857600  | -3.75086800 | -5.59812700 |
| H  | 2.96143100   | 5.16922200  | 4.70660800  |
| H  | 3.54071500   | 3.75068800  | 5.59734400  |
| H  | 4.67034300   | 4.73695300  | 4.66811300  |
| H  | 5.64850700   | 3.32492400  | -5.20452700 |
| H  | 4.13779100   | 2.83168200  | -5.98900900 |
| H  | 4.25515200   | 4.40503100  | -5.19877600 |

## NFBDT

|     |             |             |             |
|-----|-------------|-------------|-------------|
| 0 1 |             |             |             |
| C   | 0.98020900  | -0.96876600 | -0.00779400 |
| C   | 1.34193100  | 0.41636000  | 0.00415100  |
| C   | 3.50827200  | 2.51746200  | 1.34186400  |
| C   | 3.69136000  | 2.62593800  | -1.21461300 |
| C   | -3.69369400 | -2.62568700 | 1.21956300  |
| C   | 2.76329900  | 3.69670500  | 1.37381700  |
| C   | 2.50854500  | 4.34716300  | 2.57955900  |
| C   | 2.98524100  | 3.84458500  | 3.79008800  |

|   |              |             |             |
|---|--------------|-------------|-------------|
| C | 3.72398600   | 2.65649300  | 3.75318400  |
| C | 3.97992700   | 2.00424100  | 2.55473700  |
| C | 2.95605400   | 2.28231300  | -2.34726200 |
| C | 2.99401000   | 3.07919400  | -3.49101000 |
| C | 3.76596600   | 4.23854900  | -3.54252000 |
| C | 4.50720800   | 4.57701000  | -2.40338900 |
| C | 4.47231700   | 3.78844100  | -1.26261400 |
| C | -2.96359100  | -2.27866600 | 2.35507100  |
| C | -3.00401900  | -3.07377600 | 3.49938800  |
| C | -3.77235200  | -4.23621600 | 3.54878200  |
| C | -4.50930500  | -4.57691900 | 2.40812900  |
| C | -4.47221900  | -3.78936100 | 1.26617900  |
| C | 2.73333300   | 4.55534300  | 5.08946200  |
| C | 3.80080200   | 5.10650200  | -4.76833300 |
| C | -3.79693900  | -5.10856600 | 4.77166400  |
| C | -2.72743500  | -4.55922000 | -5.08110900 |
| C | -3.97288800  | -2.00184000 | -2.55036800 |
| C | -3.71278000  | -2.65288700 | -3.74923100 |
| C | -2.97645000  | -3.84178100 | -3.78493100 |
| C | -2.50389300  | -4.34637900 | -2.57289000 |
| C | -2.76217100  | -3.69735600 | -1.36780700 |
| C | -3.50650400  | -2.51701500 | -1.33692900 |
| C | 8.63447400   | 0.27186000  | 0.03669400  |
| C | 9.68573800   | -0.61900100 | 0.01948800  |
| C | 11.10527700  | -0.29113400 | 0.04592700  |
| C | 11.85514400  | -1.56819100 | 0.01016100  |
| C | 10.93782400  | -2.62841800 | -0.03440600 |
| C | 9.56580000   | -2.08701200 | -0.02994000 |
| C | 11.69418600  | 0.95779700  | 0.09726100  |
| O | 8.53664500   | -2.74673700 | -0.06157300 |
| C | 13.22127200  | -1.85305600 | 0.01486300  |
| C | 13.62212900  | -3.18884100 | -0.02526400 |
| C | 12.69528200  | -4.23237500 | -0.06936900 |
| C | 11.32995200  | -3.95529200 | -0.07430400 |
| C | -8.63502200  | -0.27221300 | -0.04122400 |
| C | -9.68644200  | 0.61849900  | -0.02573700 |
| C | -11.10588700 | 0.29043300  | -0.05482500 |
| C | -11.85600200 | 1.56737400  | -0.02022500 |
| C | -10.93892100 | 2.62772400  | 0.02620500  |
| C | -9.56681300  | 2.08651700  | 0.02415500  |
| C | -11.69455800 | -0.95855900 | -0.10739100 |
| O | -8.53782000  | 2.74639600  | 0.05781900  |
| C | -13.22216100 | 1.85203600  | -0.02733000 |
| C | -13.62328700 | 3.18775400  | 0.01235200  |
| C | -12.69667400 | 4.23141500  | 0.05833100  |
| C | -11.33131300 | 3.95453200  | 0.06566300  |
| C | -2.75875400  | -0.56749300 | 0.01704700  |
| C | -3.42171600  | 0.64057100  | 0.02996000  |
| S | -2.38607100  | 2.02625300  | 0.03348800  |
| C | -3.73420200  | -1.74056000 | -0.02946000 |
| C | -5.05290400  | -0.97008500 | -0.03260700 |
| C | -4.83001300  | 0.40662800  | 0.01376300  |
| C | 2.75807900   | 0.56769600  | -0.01043400 |
| C | 3.42097800   | -0.64040600 | -0.02409900 |
| S | 2.38533300   | -2.02606900 | -0.02606400 |
| C | 3.73371900   | 1.74068600  | 0.03422200  |
| C | 5.05239400   | 0.97013100  | 0.03509500  |
| C | 4.82929700   | -0.40657500 | -0.01051400 |
| C | -6.40519400  | -1.27278100 | -0.04943600 |
| C | -7.22974700  | -0.13206300 | -0.02094200 |
| S | -6.25851900  | 1.34158700  | 0.03628500  |
| C | 6.40476800   | 1.27267500  | 0.04911200  |
| C | 7.22914600   | 0.13186800  | 0.01916300  |
| S | 6.25765500   | -1.34168800 | -0.03581700 |
| C | -0.33542900  | -1.39221600 | -0.00631800 |
| C | -1.34261200  | -0.41616300 | 0.00405700  |
| C | -0.98091400  | 0.96895900  | 0.01625500  |
| C | 0.33472300   | 1.39240600  | 0.01489800  |
| C | -13.10343700 | -1.16511700 | -0.13129700 |
| N | -14.24412600 | -1.39457200 | -0.15297200 |
| C | -10.97513700 | -2.18692200 | -0.14516500 |
| N | -10.43429000 | -3.21726600 | -0.17813300 |
| C | 13.10312600  | 1.16423200  | 0.11845600  |
| N | 14.24386300  | 1.39364600  | 0.13791400  |
| C | 10.97494400  | 2.18622500  | 0.13626700  |
| N | 10.43419400  | 3.21658600  | 0.17025400  |
| H | 2.38811900   | 4.12693500  | 0.44999300  |
| H | 1.92845000   | 5.26670800  | 2.57336300  |
| H | 4.10736800   | 2.23581900  | 4.67979200  |
| H | 4.55626100   | 1.08321300  | 2.56298300  |

|   |              |             |             |
|---|--------------|-------------|-------------|
| H | 2.34703800   | 1.38379800  | -2.34909400 |
| H | 2.40823500   | 2.78745500  | -4.35920700 |
| H | 5.12184000   | 5.47403600  | -2.41144000 |
| H | 5.04967600   | 4.08743500  | -0.39194100 |
| H | -2.35825400  | -1.37765100 | 2.35845000  |
| H | -2.42388900  | -2.77827800 | 4.37016000  |
| H | -5.12334500  | -5.47431200 | 2.41582500  |
| H | -5.04751500  | -4.08968600 | 0.39459600  |
| H | 1.99708900   | 5.35440800  | 4.97181300  |
| H | 2.36721300   | 3.86472200  | 5.85574300  |
| H | 3.65431300   | 5.00591200  | 5.47665500  |
| H | 3.25389000   | 4.64957600  | -5.59674800 |
| H | 3.35249400   | 6.08666900  | -4.57102100 |
| H | 4.82934900   | 5.28540300  | -5.09836300 |
| H | -3.17841500  | -6.00237100 | 4.62921700  |
| H | -3.41437400  | -4.57891900 | 5.64781800  |
| H | -4.81150200  | -5.45183900 | 4.99552700  |
| H | -2.54814800  | -3.85489600 | -5.89866500 |
| H | -1.86481300  | -5.22685700 | -5.00905400 |
| H | -3.59294400  | -5.16980900 | -5.36415000 |
| H | -4.54677300  | -1.07928500 | -2.55986000 |
| H | -4.09028200  | -2.22950100 | -4.67694100 |
| H | -1.92385600  | -5.26604600 | -2.56584000 |
| H | -2.38936700  | -4.12808400 | -0.44326300 |
| H | 8.90475900   | 1.32279500  | 0.07147500  |
| H | 13.97323000  | -1.07589300 | 0.04821400  |
| H | 14.68329900  | -3.41790700 | -0.02203100 |
| H | 13.04342400  | -5.26009600 | -0.09978100 |
| H | 10.58406000  | -4.74318500 | -0.10806900 |
| H | -8.90510000  | -1.32317200 | -0.07680300 |
| H | -13.97394100 | 1.07476500  | -0.06218900 |
| H | -14.68448300 | 3.41666400  | 0.00726500  |
| H | -13.04502200 | 5.25907900  | 0.08832900  |
| H | -10.58559700 | 4.74252700  | 0.10092700  |
| H | -6.82695200  | -2.27132800 | -0.08309900 |
| H | 6.82671500   | 2.27117400  | 0.08170200  |
| H | -0.59198600  | -2.44543100 | -0.01776400 |
| H | 0.59128100   | 2.44561700  | 0.02615400  |

## ITIC2

|     |             |             |             |
|-----|-------------|-------------|-------------|
| 0 1 |             |             |             |
| C   | -0.71237300 | -1.11293100 | 0.29763900  |
| C   | -1.43693400 | 0.10297800  | 0.06921700  |
| C   | -0.67933400 | 1.27738700  | -0.14396200 |
| C   | 0.70874900  | 1.14431600  | -0.13904100 |
| C   | 1.43360700  | -0.07245200 | 0.08551300  |
| C   | 0.67582900  | -1.24543600 | 0.30591800  |
| S   | 1.75559500  | 2.51729500  | -0.44650200 |
| C   | 3.12554500  | 1.49779500  | -0.23944200 |
| C   | 2.84892300  | 0.17457300  | 0.04537300  |
| S   | -1.76001700 | -2.48456200 | 0.60883800  |
| C   | -3.12941900 | -1.46717500 | 0.38981700  |
| C   | -2.85196500 | -0.14538700 | 0.10057600  |
| C   | 4.53342700  | 1.71222700  | -0.26580800 |
| C   | 5.17475800  | 0.50693100  | -0.00569400 |
| C   | 4.15547100  | -0.60010600 | 0.28715400  |
| S   | 5.61397000  | 2.99754300  | -0.54989900 |
| C   | 6.98764500  | 1.91287600  | -0.35442100 |
| C   | 6.56118000  | 0.61230000  | -0.06658400 |
| C   | -4.53781200 | -1.67734200 | 0.42910100  |
| C   | -5.17799100 | -0.47906800 | 0.13552600  |
| C   | -4.15752200 | 0.63159600  | -0.13792600 |
| S   | -5.61910700 | -2.95451100 | 0.74482100  |
| C   | -6.99253200 | -1.88689100 | 0.47130300  |
| C   | -6.56508200 | -0.59407000 | 0.15202500  |
| C   | 4.35253500  | -0.96714800 | 1.76627700  |
| C   | 4.35026300  | -1.74464700 | -0.72003700 |
| C   | -4.35365800 | 1.75210400  | 0.89842500  |
| C   | -4.34572500 | 1.03364500  | -1.60787900 |
| C   | 5.51346900  | -1.63692900 | 2.17690100  |
| C   | 5.75620400  | -1.89962200 | 3.51846400  |
| C   | 4.85921500  | -1.49347100 | 4.51225500  |
| C   | 3.71636700  | -0.80625100 | 4.10448500  |
| C   | 3.46675300  | -0.54576300 | 2.75832800  |



|   |              |             |             |
|---|--------------|-------------|-------------|
| C | 4.54616100   | -3.07371500 | -0.35808800 |
| C | 4.78010500   | -4.04801400 | -1.32862400 |
| C | 4.81012800   | -3.73415500 | -2.68535300 |
| C | 4.58841300   | -2.39905500 | -3.04565000 |
| C | 4.36866900   | -1.42479600 | -2.08414800 |
| C | -4.34547700  | 1.40364300  | 2.25626500  |
| C | -4.56435800  | 2.35310100  | 3.24235100  |
| C | -4.81132600  | 3.69269900  | 2.91454500  |
| C | -4.80786200  | 4.03530500  | 1.56480900  |
| C | -4.57413500  | 3.08564300  | 0.56949400  |
| C | -3.45126000  | 0.63818000  | -2.60232500 |
| C | -3.69035700  | 0.93166600  | -3.94350700 |
| C | -4.83148500  | 1.62573700  | -4.34365900 |
| C | -5.73793200  | 2.00513000  | -3.34805800 |
| C | -5.50558700  | 1.70902100  | -2.01195500 |
| C | 5.11701500   | -1.79981400 | 5.96008700  |
| C | 5.07832800   | -4.77983300 | -3.73042100 |
| C | -5.06543100  | 4.71387900  | 3.98717800  |
| C | -5.08202400  | 1.96152900  | -5.78608100 |
| C | 1.22496100   | -2.60300000 | 0.49477700  |
| C | -1.22991500  | 2.63731300  | -0.31179500 |
| C | -1.65196600  | 3.27485200  | -1.44837500 |
| C | -1.95056500  | 4.64948700  | -1.24021900 |
| C | -1.74454800  | 5.06699500  | 0.04744100  |
| S | -1.18099100  | 3.75548700  | 1.02251200  |
| C | 1.64575800   | -3.21831200 | 1.64425400  |
| C | 1.93581400   | -4.59868700 | 1.46520500  |
| C | 1.72495800   | -5.04199000 | 0.18677300  |
| S | 1.16808900   | -3.74834900 | -0.81526500 |
| C | 8.28343500   | 2.47984500  | -0.37653000 |
| C | -8.28707500  | -2.39816200 | 0.72532300  |
| C | 9.54101900   | 1.92765900  | -0.36410700 |
| C | -9.54422800  | -1.88451300 | 0.51983800  |
| C | 10.65522300  | 2.80050600  | 0.10907600  |
| C | 11.78399000  | 1.89326400  | 0.40866800  |
| C | 11.43243300  | 0.58186500  | 0.04693400  |
| C | 10.09384500  | 0.60827400  | -0.58423500 |
| C | -10.64934700 | -2.45084600 | 1.34700400  |
| C | -11.76983300 | -1.49150800 | 1.24034000  |
| C | -11.42329200 | -0.47233800 | 0.33702600  |
| C | -10.09857000 | -0.78626600 | -0.24272400 |
| C | 13.00916800  | 2.19975700  | 0.97671700  |
| C | 13.90342500  | 1.15581900  | 1.20627100  |
| C | 13.55827000  | -0.15447500 | 0.86758000  |
| C | 12.32958000  | -0.45897000 | 0.28040000  |
| C | -12.98479800 | -1.50826000 | 1.90446900  |
| C | -13.87331800 | -0.46073200 | 1.66951500  |
| C | -13.53302000 | 0.56718400  | 0.78710600  |
| C | -12.31486700 | 0.57394200  | 0.10652300  |
| O | 10.61943200  | 4.00802400  | 0.26359500  |
| C | 9.59439400   | -0.37046400 | -1.42132900 |
| O | -10.61248100 | -3.46963200 | 2.01335900  |
| C | -9.61176000  | -0.27782700 | -1.43124200 |
| C | -8.53115200  | -0.88228400 | -2.13016900 |
| N | -7.67777500  | -1.38329000 | -2.74185600 |
| C | -10.22668500 | 0.79792200  | -2.13213700 |
| N | -10.68845700 | 1.68729300  | -2.72370500 |
| C | 8.48833500   | -0.14321000 | -2.28527200 |
| N | 7.61372100   | 0.03064000  | -3.03254800 |
| C | 10.22285000  | -1.63492700 | -1.60480600 |
| N | 10.70004700  | -2.68354100 | -1.76793100 |
| H | 7.25715700   | -0.19404500 | 0.12652400  |
| H | -7.25994800  | 0.22083500  | -0.00598600 |
| H | 6.23983400   | -1.96527200 | 1.43974500  |
| H | 6.66566300   | -2.42510800 | 3.80009200  |
| H | 3.00427100   | -0.46174500 | 4.85053900  |
| H | 2.56787400   | -0.00106200 | 2.48859500  |
| H | 4.50453100   | -3.36965600 | 0.68341800  |
| H | 4.94001900   | -5.07661000 | -1.01391900 |
| H | 4.60153100   | -2.11686300 | -4.09559200 |
| H | 4.21881200   | -0.39456600 | -2.39700500 |
| H | -4.16732300  | 0.37010600  | 2.54364500  |
| H | -4.55135900  | 2.05004300  | 4.28677800  |
| H | -4.98796700  | 5.06784100  | 1.27485400  |
| H | -4.55283600  | 3.40417900  | -0.46579600 |
| H | -2.55403000  | 0.08761500  | -2.33923900 |
| H | -2.97232900  | 0.60553500  | -4.69204400 |
| H | -6.64882100  | 2.53105400  | -3.62421500 |
| H | -6.24162200  | 2.01417600  | -1.27433600 |
| H | 4.90126600   | -2.85098900 | 6.18432700  |

|   |              |             |             |
|---|--------------|-------------|-------------|
| H | 6.16408100   | -1.62326100 | 6.22456800  |
| H | 4.49161200   | -1.18784700 | 6.61509700  |
| H | 5.10594300   | -5.78205800 | -3.29466000 |
| H | 4.30920700   | -4.76934500 | -4.50965500 |
| H | 6.03967500   | -4.60484600 | -4.22642300 |
| H | -4.22557500  | 4.76984200  | 4.68808700  |
| H | -5.21644300  | 5.70965800  | 3.56240600  |
| H | -5.95523600  | 4.46079400  | 4.57411300  |
| H | -4.91986200  | 3.02880800  | -5.97660400 |
| H | -4.41557000  | 1.40193200  | -6.44726600 |
| H | -6.11407800  | 1.73694600  | -6.07248700 |
| H | -1.73827100  | 2.77346300  | -2.40479800 |
| H | -2.30381700  | 5.31425800  | -2.02141500 |
| H | 1.73572900   | -2.69680100 | 2.58962100  |
| H | 2.28653100   | -5.24916000 | 2.25948100  |
| H | 8.31940500   | 3.56707500  | -0.27921900 |
| H | -8.31943600  | -3.33436100 | 1.28694200  |
| H | 13.25034100  | 3.22660500  | 1.23317700  |
| H | 14.87144100  | 1.35736300  | 1.65422200  |
| H | 14.26079700  | -0.95850000 | 1.06399300  |
| H | 12.09338600  | -1.48638600 | 0.03294800  |
| H | -13.22258500 | -2.31845000 | 2.58660100  |
| H | -14.83332800 | -0.43782700 | 2.17565200  |
| H | -14.23124900 | 1.38226600  | 0.62365900  |
| H | -12.08208000 | 1.38779200  | -0.56894100 |
| C | 1.93482300   | -6.41259300 | -0.36602200 |
| H | 1.01384600   | -6.82698600 | -0.78870600 |
| H | 2.69137400   | -6.41527900 | -1.15786000 |
| H | 2.27357700   | -7.08218600 | 0.42837600  |
| C | -1.96360400  | 6.42442100  | 0.62839700  |
| H | -1.04579300  | 6.83602800  | 1.06065500  |
| H | -2.30553100  | 7.10804800  | -0.15254500 |
| H | -2.72130500  | 6.40606700  | 1.41897800  |

## ITVFFIC

|     |             |             |             |
|-----|-------------|-------------|-------------|
| 0 1 |             |             |             |
| C   | -1.10190800 | 0.82196700  | -0.01870000 |
| C   | -1.26465700 | -0.58313800 | 0.04229100  |
| C   | -0.16265400 | -1.41790900 | 0.05839200  |
| C   | 1.10194200  | -0.82209100 | 0.01787000  |
| C   | 1.26469000  | 0.58301300  | -0.04312500 |
| C   | 0.16268700  | 1.41778500  | -0.05923000 |
| C   | 2.42598500  | -1.39125700 | 0.03217200  |
| C   | 3.38756500  | -0.40080300 | 0.00187600  |
| C   | 2.74925500  | 0.97497100  | -0.06393300 |
| C   | -2.42594900 | 1.39113900  | -0.03294400 |
| C   | -3.38753100 | 0.40068800  | -0.00260300 |
| C   | -2.74922500 | -0.97509100 | 0.06312900  |
| C   | 3.04668600  | 1.83690400  | 1.16795400  |
| C   | 3.18148500  | 1.64110800  | -1.37726400 |
| C   | -3.04668900 | -1.83694800 | -1.16880700 |
| C   | -3.18141600 | -1.64130900 | 1.37642700  |
| C   | 2.82230700  | 3.21736800  | 1.13661200  |
| C   | 3.01320900  | 3.99652900  | 2.27148300  |
| C   | 3.43855500  | 3.43059000  | 3.47732200  |
| C   | 3.65631300  | 2.05187400  | 3.50455400  |
| C   | 3.46339400  | 1.26636500  | 2.37167400  |
| C   | 4.39665500  | 2.33133900  | -1.44357000 |
| C   | 4.85154900  | 2.86359500  | -2.64452000 |
| C   | 4.11183200  | 2.73000600  | -3.82283400 |
| C   | 2.90309800  | 2.03403200  | -3.75291600 |
| C   | 2.44406500  | 1.49678300  | -2.55387500 |
| C   | -2.82226700 | -3.21741600 | -1.13755800 |
| C   | -3.01320900 | -3.99651300 | -2.27245800 |
| C   | -3.43863800 | -3.43051200 | -3.47824800 |
| C   | -3.65643700 | -2.05180800 | -3.50538500 |
| C   | -3.46347800 | -1.26635500 | -2.37246400 |
| C   | -2.44399700 | -1.49702400 | 2.55302400  |
| C   | -2.90300100 | -2.03437600 | 3.75205100  |
| C   | -4.11168800 | -2.73039600 | 3.82194200  |
| C   | -4.85142200 | -2.86395000 | 2.64361200  |
| C   | -4.39657000 | -2.33160500 | 1.44270600  |
| S   | 3.05780200  | -3.00172100 | 0.07297000  |
| C   | 4.67711500  | -2.35505600 | 0.05388800  |
| C   | 4.68218500  | -0.94904200 | 0.00906400  |

|   |              |             |             |
|---|--------------|-------------|-------------|
| C | 5.95215900   | -2.92772800 | 0.07908400  |
| C | 6.95364700   | -1.96278100 | 0.05473500  |
| S | 6.29295700   | -0.33251800 | -0.00396900 |
| S | -3.05776000  | 3.00160300  | -0.07365300 |
| C | -4.67707200  | 2.35495000  | -0.05446100 |
| C | -4.68214900  | 0.94893500  | -0.00967700 |
| C | -5.95211400  | 2.92763300  | -0.07951300 |
| C | -6.95360800  | 1.96269500  | -0.05508500 |
| S | -6.29293100  | 0.33242400  | 0.00350300  |
| C | 8.34612800   | -2.22657200 | 0.07283500  |
| C | -8.34608600  | 2.22651400  | -0.07299700 |
| C | 9.35870700   | -1.30268800 | 0.04964200  |
| C | -9.35869000  | 1.30266100  | -0.04969100 |
| C | 10.70404500  | -1.73301400 | 0.07860800  |
| C | -10.70401500 | 1.73304400  | -0.07840600 |
| C | 11.81763800  | -0.92082400 | 0.06234200  |
| C | -11.81764500 | 0.92091000  | -0.06189600 |
| C | 13.21549700  | -1.31647000 | 0.09327500  |
| C | 14.02830500  | -0.08067800 | 0.05416400  |
| C | 13.16855400  | 1.02421900  | 0.00226500  |
| C | 11.76469000  | 0.56009100  | 0.00523300  |
| C | -13.21549000 | 1.31663300  | -0.09247600 |
| C | -14.02835900 | 0.08089900  | -0.05279300 |
| C | -13.16865600 | -1.02404200 | -0.00105000 |
| C | -11.76476400 | -0.56000100 | -0.00463900 |
| O | 10.78115100  | 1.28238400  | -0.03309100 |
| C | 13.73786000  | -2.59419700 | 0.14992100  |
| O | -10.78125300 | -1.28234800 | 0.03338900  |
| C | -13.73779200 | 2.59437500  | -0.14935000 |
| C | 15.40923200  | 0.12428300  | 0.06234500  |
| C | 15.86557600  | 1.43117700  | 0.01710100  |
| C | 14.99270500  | 2.52351400  | -0.03466700 |
| C | 13.62289600  | 2.33222700  | -0.04273700 |
| C | -15.40930200 | -0.12397700 | -0.06034400 |
| C | -15.86571000 | -1.43083300 | -0.01465300 |
| C | -14.99288500 | -2.52321600 | 0.03693900  |
| C | -13.62306100 | -2.33201400 | 0.04438400  |
| F | 15.51555100  | 3.74525200  | -0.07530200 |
| F | 17.17290100  | 1.67825700  | 0.02253400  |
| F | -17.17305200 | -1.67783200 | -0.01946600 |
| F | -15.51579000 | -3.74491400 | 0.07802900  |
| C | -4.58864400  | -3.33729100 | 5.11086100  |
| C | -3.68099300  | -4.28177400 | -4.69223300 |
| C | 4.58870500   | 3.33682300  | -5.11182000 |
| C | 3.68090600   | 4.28190800  | 4.69126700  |
| C | 15.13418400  | -2.87058000 | 0.17244600  |
| N | 16.26537900  | -3.14341300 | 0.19241000  |
| C | 12.94800200  | -3.77773600 | 0.19232500  |
| N | 12.34501300  | -4.77257900 | 0.22908800  |
| C | -15.13410600 | 2.87083900  | -0.17148300 |
| N | -16.26528700 | 3.14375300  | -0.19112300 |
| C | -12.94787300 | 3.77784900  | -0.19244200 |
| N | -12.34484400 | 4.77264700  | -0.22974100 |
| H | -0.27249700  | -2.49729600 | 0.09934000  |
| H | 0.27253200   | 2.49717300  | -0.10015600 |
| H | 2.50778500   | 3.69228200  | 0.21154500  |
| H | 2.83139700   | 5.06730500  | 2.21815300  |
| H | 3.98427300   | 1.58054400  | 4.42791500  |
| H | 3.63685400   | 0.19582600  | 2.43142000  |
| H | 4.98990300   | 2.46840300  | -0.54368800 |
| H | 5.80068100   | 3.39375900  | -2.66468700 |
| H | 2.30675500   | 1.90691400  | -4.65331300 |
| H | 1.50152000   | 0.95812800  | -2.54118500 |
| H | -2.50768200  | -3.69236900 | -0.21253200 |
| H | -2.83136800  | -5.06728800 | -2.21920500 |
| H | -3.98446500  | -1.58042700 | -4.42869500 |
| H | -3.63698900  | -0.19582100 | -2.43214300 |
| H | -1.50147000  | -0.95834000 | 2.54036100  |
| H | -2.30665100  | -1.90728800 | 4.65244600  |
| H | -5.80052400  | -3.39417200 | 2.66376000  |
| H | -4.98981100  | -2.46864400 | 0.54281500  |
| H | 6.16472100   | -3.98990800 | 0.11342800  |
| H | -6.16467000  | 3.98981600  | -0.11379600 |
| H | 8.61149400   | -3.28307700 | 0.11100400  |
| H | -8.61143000  | 3.28302700  | -0.11109300 |
| H | 9.15225900   | -0.23755700 | 0.01064400  |
| H | -9.15227400  | 0.23752000  | -0.01076600 |
| H | 10.84921500  | -2.80895700 | 0.11827900  |
| H | -10.84914400 | 2.80899400  | -0.11803300 |
| H | 16.14039000  | -0.67255000 | 0.10144900  |

|   |              |             |             |
|---|--------------|-------------|-------------|
| H | 12.93904800  | 3.17325000  | -0.08235300 |
| H | -16.14042800 | 0.67289500  | -0.09927500 |
| H | -12.93924800 | -3.17307100 | 0.08386400  |
| H | -4.26612500  | -4.38180300 | 5.19618000  |
| H | -4.18983200  | -2.80116300 | 5.97624300  |
| H | -5.68030600  | -3.32901000 | 5.17574300  |
| H | -2.98983700  | -5.12853900 | -4.73128000 |
| H | -4.69758800  | -4.69250900 | -4.68661600 |
| H | -3.56786000  | -3.70438800 | -5.61376400 |
| H | 5.68046500   | 3.33195600  | -5.17514000 |
| H | 4.19282000   | 2.79836200  | -5.97710800 |
| H | 4.26290400   | 4.38017100  | -5.19893200 |
| H | 4.69746300   | 4.69274000  | 4.68556900  |
| H | 2.98967400   | 5.12860900  | 4.73033800  |
| H | 3.56789500   | 3.70454100  | 5.61282500  |

## INIC

|     |              |             |             |
|-----|--------------|-------------|-------------|
| 0 1 |              |             |             |
| C   | -0.83039800  | -1.11756000 | 0.01092400  |
| C   | -1.36152200  | 0.19424400  | 0.01205300  |
| C   | -0.53702800  | 1.32326200  | 0.00388700  |
| C   | 0.83040200   | 1.11756200  | -0.01093100 |
| C   | 1.36152700   | -0.19424300 | -0.01206000 |
| C   | 0.53703200   | -1.32326000 | -0.00389500 |
| C   | -1.94533100  | -2.17433500 | 0.00887400  |
| C   | 1.94533600   | 2.17433700  | -0.00887500 |
| C   | -2.79737600  | 0.05781700  | 0.01577100  |
| C   | -3.16652600  | -1.27160700 | -0.00011700 |
| C   | 2.79738000   | -0.05781600 | -0.01578000 |
| C   | 3.16653100   | 1.27160800  | 0.00010900  |
| C   | -1.97922100  | -3.01612500 | 1.29172400  |
| C   | -1.81386600  | -3.02182300 | -1.26138400 |
| C   | 1.97922300   | 3.01614100  | -1.29171500 |
| C   | -1.39481100  | -2.56807600 | 2.47776200  |
| C   | -1.51320100  | -3.30368400 | 3.65331000  |
| C   | -2.21839800  | -4.50832300 | 3.68926500  |
| C   | -2.81080700  | -4.94813100 | 2.50207300  |
| C   | -2.69463100  | -4.21813700 | 1.32475400  |
| C   | -2.46918000  | -2.66764000 | -2.44189500 |
| C   | -2.27781300  | -3.39756800 | -3.61143300 |
| C   | -1.42582900  | -4.50308900 | -3.64561000 |
| C   | -0.76554200  | -4.84964900 | -2.46285100 |
| C   | -0.95570700  | -4.12621200 | -1.29142600 |
| C   | 2.69461900   | 4.21816100  | -1.32472700 |
| C   | 2.81079000   | 4.94817100  | -2.50203800 |
| C   | 2.21839100   | 4.50837000  | -3.68923600 |
| C   | 1.51320800   | 3.30372100  | -3.65329900 |
| C   | 1.39482400   | 2.56809800  | -2.47776100 |
| C   | -2.31668000  | -5.31780200 | 4.95114800  |
| C   | -1.24540700  | -5.30977600 | -4.90014500 |
| C   | 2.31665600   | 5.31786700  | -4.95111000 |
| C   | 1.24536000   | 5.30972200  | 4.90017200  |
| C   | 0.95570900   | 4.12620100  | 1.29144400  |
| C   | 0.76553800   | 4.84962300  | 2.46287200  |
| C   | 1.42582300   | 4.50304800  | 3.64563500  |
| C   | 2.27781000   | 3.39753500  | 3.61144700  |
| C   | 2.46918400   | 2.66761900  | 2.44189800  |
| C   | 1.81387200   | 3.02181100  | 1.26139300  |
| C   | -10.50735800 | -0.62817900 | -0.03583600 |
| C   | -11.46730600 | 0.35830600  | -0.03636900 |
| C   | -11.20930400 | 1.81013900  | -0.01021600 |
| C   | -12.52472100 | 2.47775000  | -0.01784800 |
| C   | -13.53728500 | 1.50713900  | -0.04754000 |
| C   | -12.91189100 | 0.16514300  | -0.06118100 |
| O   | -10.12246100 | 2.36913300  | 0.01400000  |
| C   | -13.61516200 | -1.02348000 | -0.09415500 |
| C   | -12.79260600 | 3.83606600  | 0.00013700  |
| C   | -14.12626500 | 4.23821200  | -0.01202300 |
| C   | -15.14622900 | 3.28473900  | -0.04144400 |
| C   | -14.87100000 | 1.91723200  | -0.05954100 |
| C   | 10.50736300  | 0.62817700  | 0.03582700  |
| C   | 11.46730900  | -0.35830900 | 0.03636500  |
| C   | 11.20930600  | -1.81014200 | 0.01020200  |
| C   | 12.52472300  | -2.47775400 | 0.01781800  |
| C   | 13.53728800  | -1.50714400 | 0.04751200  |
| C   | 12.91189400  | -0.16514800 | 0.06117600  |
| O   | 10.12246200  | -2.36913400 | -0.01401000 |

|   |              |             |             |
|---|--------------|-------------|-------------|
| C | 13.61516700  | 1.02347400  | 0.09417700  |
| C | 12.79260600  | -3.83607000 | -0.00018300 |
| C | 14.12626500  | -4.23821700 | 0.01196000  |
| C | 15.14623000  | -3.28474500 | 0.04138000  |
| C | 14.87100300  | -1.91723800 | 0.05949400  |
| C | 4.56616800   | 1.41419500  | -0.00855500 |
| C | 5.23177900   | 0.17793000  | -0.02189300 |
| S | 4.12652200   | -1.16449600 | -0.03841100 |
| S | 5.65977200   | 2.76968800  | 0.01551400  |
| C | 7.01867200   | 1.67055300  | 0.01354900  |
| C | 6.63083600   | 0.31979400  | -0.00965100 |
| C | -4.56616300  | -1.41419400 | 0.00854800  |
| C | -5.23177500  | -0.17792900 | 0.02188600  |
| S | -4.12651800  | 1.16449700  | 0.03840100  |
| S | -5.65976700  | -2.76968800 | -0.01552600 |
| C | -7.01866800  | -1.67055300 | -0.01356000 |
| C | -6.63083200  | -0.31979400 | 0.00964200  |
| C | 8.39812800   | 1.83968500  | 0.02743100  |
| C | 9.09342000   | 0.62281500  | 0.01763600  |
| S | 7.98130300   | -0.75009800 | -0.01324600 |
| C | -8.39812300  | -1.83968500 | -0.02744300 |
| C | -9.09341600  | -0.62281600 | -0.01764600 |
| S | -7.98129900  | 0.75009700  | 0.01324000  |
| C | -13.01405000 | -2.31438500 | -0.11147900 |
| N | -12.57139100 | -3.39093200 | -0.12712900 |
| C | -15.03729000 | -1.09749100 | -0.11619700 |
| N | -16.19439400 | -1.21967000 | -0.13525600 |
| C | 13.01405500  | 2.31437900  | 0.11153800  |
| N | 12.57139800  | 3.39092600  | 0.12721900  |
| C | 15.03729400  | 1.09748300  | 0.11621400  |
| N | 16.19439900  | 1.21966200  | 0.13527000  |
| H | -0.95685200  | 2.32459600  | 0.01074300  |
| H | 0.95685600   | -2.32459500 | -0.01075200 |
| H | -0.84141400  | -1.63415300 | 2.48978900  |
| H | -1.04602700  | -2.93066600 | 4.56156900  |
| H | -3.37284500  | -5.87899500 | 2.49679500  |
| H | -3.15437400  | -4.59838500 | 0.41671200  |
| H | -3.13373300  | -1.80859700 | -2.45502600 |
| H | -2.80323400  | -3.09902700 | -4.51541100 |
| H | -0.09167100  | -5.70311200 | -2.45695700 |
| H | -0.43890300  | -4.43307200 | -0.38654800 |
| H | 3.15435400   | 4.59840200  | -0.41667900 |
| H | 3.37281800   | 5.87904100  | -2.49674700 |
| H | 1.04604300   | 2.93070800  | -4.56156400 |
| H | 0.84143800   | 1.63416800  | -2.48980000 |
| H | -2.17114700  | -4.69458700 | 5.83748400  |
| H | -3.28981000  | -5.81024000 | 5.03452300  |
| H | -1.55274100  | -6.10398100 | 4.97404100  |
| H | -1.94803600  | -6.15100900 | -4.93060900 |
| H | -1.42327500  | -4.70432100 | -5.79301500 |
| H | -0.23676200  | -5.72758400 | -4.96454300 |
| H | 1.55255200   | 6.10388200  | -4.97409800 |
| H | 3.28969200   | 5.81051000  | -5.03436800 |
| H | 2.17136000   | 4.69462000  | -5.83746100 |
| H | 0.23640700   | 5.72672600  | 4.96500900  |
| H | 1.42413700   | 4.70450600  | 5.79302000  |
| H | 1.94731200   | 6.15153600  | 4.93020200  |
| H | 0.43891000   | 4.43307100  | 0.38656700  |
| H | 0.09166500   | 5.70308500  | 2.45698600  |
| H | 2.80323100   | 3.09898800  | 4.51542200  |
| H | 3.13374100   | 1.80857900  | 2.45502300  |
| H | -10.87607900 | -1.64902000 | -0.05380100 |
| H | -11.97725900 | 4.55228400  | 0.02296000  |
| H | -15.69188100 | 1.21275200  | -0.08207900 |
| H | 10.87608400  | 1.64901900  | 0.05378800  |
| H | 11.97725800  | -4.55228700 | -0.02300500 |
| H | 15.69188400  | -1.21275900 | 0.08203000  |
| H | 8.91314500   | 2.79349000  | 0.04603400  |
| H | -8.91314000  | -2.79349100 | -0.04604800 |
| H | -14.37727000 | 5.29421100  | 0.00131900  |
| H | -16.18145200 | 3.61147100  | -0.05053200 |
| H | 16.18145300  | -3.61147800 | 0.05045300  |
| H | 14.37726900  | -5.29421600 | -0.00139500 |

## INIC2

|    |             |             |            |
|----|-------------|-------------|------------|
| 01 |             |             |            |
| C  | -0.80430100 | -1.13674800 | 0.01003100 |

|   |              |             |             |
|---|--------------|-------------|-------------|
| C | -1.36541100  | 0.16263300  | 0.01128100  |
| C | -0.56746200  | 1.31073100  | 0.00411000  |
| C | 0.80430300   | 1.13674700  | -0.00998500 |
| C | 1.36541200   | -0.16263300 | -0.01123700 |
| C | 0.56746300   | -1.31073100 | -0.00406600 |
| C | -1.89459900  | -2.21893300 | 0.00693900  |
| C | 1.89460100   | 2.21893300  | -0.00688800 |
| C | -2.79761400  | -0.00695000 | 0.01369900  |
| C | -3.13631400  | -1.34463000 | -0.00353800 |
| C | 2.79761600   | 0.00694900  | -0.01366200 |
| C | 3.13631600   | 1.34462900  | 0.00357400  |
| C | -1.91114300  | -3.06126500 | 1.28980300  |
| C | -1.74193100  | -3.06392100 | -1.26265100 |
| C | 1.91113800   | 3.06128100  | -1.28974100 |
| C | -1.33507300  | -2.60298100 | 2.47596300  |
| C | -1.43899300  | -3.34180200 | 3.65096400  |
| C | -2.12093700  | -4.55973800 | 3.68617400  |
| C | -2.70501600  | -5.00999600 | 2.49874000  |
| C | -2.60309600  | -4.27697200 | 1.32205700  |
| C | -2.40258900  | -2.72520600 | -2.44472500 |
| C | -2.19230600  | -3.45135300 | -3.61340400 |
| C | -1.31537400  | -4.53727000 | -3.64512100 |
| C | -0.65013000  | -4.86832900 | -2.46069200 |
| C | -0.85927900  | -4.14885000 | -1.29007500 |
| C | 2.60310100   | 4.27698100  | -1.32198800 |
| C | 2.70501300   | 5.01002000  | -2.49866400 |
| C | 2.12091500   | 4.55978100  | -3.68609600 |
| C | 1.43896300   | 3.34184800  | -3.65089300 |
| C | 1.33505200   | 2.60301500  | -2.47590100 |
| C | -2.20344100  | -5.37198100 | 4.94740700  |
| C | -1.11354700  | -5.34011700 | -4.89885400 |
| C | 2.20339900   | 5.37204000  | -4.94732000 |
| C | 1.11353100   | 5.34005100  | 4.89894500  |
| C | 0.85925800   | 4.14881200  | 1.29016700  |
| C | 0.65011100   | 4.86827300  | 2.46079000  |
| C | 1.31538700   | 4.53721700  | 3.64520800  |
| C | 2.19234700   | 3.45132900  | 3.61346200  |
| C | 2.40262900   | 2.72519600  | 2.44477000  |
| C | 1.74194000   | 3.06390300  | 1.26271500  |
| C | -10.48864300 | -0.86244700 | -0.03794100 |
| C | -11.46971100 | 0.10401500  | -0.03560200 |
| C | -11.24234900 | 1.56176800  | -0.00936300 |
| C | -12.56933200 | 2.20019700  | -0.01458700 |
| C | -13.56178600 | 1.20937100  | -0.04287200 |
| C | -12.90783700 | -0.12090000 | -0.05753800 |
| O | -10.16739100 | 2.14341200  | 0.01273700  |
| C | -13.58994100 | -1.32125200 | -0.08845300 |
| C | -12.86953400 | 3.55343400  | 0.00429300  |
| C | -14.20606100 | 3.93486700  | -0.00537500 |
| C | -15.18325400 | 2.94338300  | -0.03357700 |
| C | -14.90385300 | 1.58126400  | -0.05276500 |
| C | 10.48864600  | 0.86244700  | 0.03789300  |
| C | 11.46971400  | -0.10401400 | 0.03555000  |
| C | 11.24235400  | -1.56176800 | 0.00931200  |
| C | 12.56933700  | -2.20019500 | 0.01450700  |
| C | 13.56179100  | -1.20936800 | 0.04277700  |
| C | 12.90784000  | 0.12090200  | 0.05746700  |
| O | 10.16739600  | -2.14341300 | -0.01277000 |
| C | 13.58994300  | 1.32125500  | 0.08839200  |
| C | 12.86954100  | -3.55343100 | -0.00438600 |
| C | 14.20606800  | -3.93486300 | 0.00525200  |
| C | 15.18326000  | -2.94337800 | 0.03343700  |
| C | 14.90385800  | -1.58125900 | 0.05263900  |
| C | 4.53235500   | 1.51878800  | -0.00376300 |
| C | 5.22551600   | 0.29745400  | -0.01785800 |
| S | 4.15097800   | -1.06918500 | -0.03664500 |
| S | 5.59576000   | 2.89813700  | 0.02224300  |
| C | 6.97875400   | 1.82913100  | 0.01961800  |
| C | 6.62072800   | 0.46989300  | -0.00491500 |
| C | -4.53235300  | -1.51878900 | 0.00378900  |
| C | -5.22551400  | -0.29745500 | 0.01787800  |
| S | -4.15097700  | 1.06918400  | 0.03667800  |
| S | -5.59575800  | -2.89813800 | -0.02223400 |
| C | -6.97875200  | -1.82913200 | -0.01962700 |
| C | -6.62072600  | -0.46989400 | 0.00491500  |
| C | 8.35386700   | 2.02810700  | 0.03319700  |
| C | 9.07585500   | 0.82627600  | 0.02182800  |
| S | 7.99384300   | -0.57069300 | -0.00953100 |
| C | -8.35386500  | -2.02810800 | -0.03322500 |
| C | -9.07585300  | -0.82627700 | -0.02186000 |

|   |              |             |             |
|---|--------------|-------------|-------------|
| S | -7.99384100  | 0.57069300  | 0.00951800  |
| C | -12.96475600 | -2.60067800 | -0.10507000 |
| N | -12.50045000 | -3.66794500 | -0.11976700 |
| C | -15.01062500 | -1.41802800 | -0.10836000 |
| N | -16.16628800 | -1.55276800 | -0.12566700 |
| C | 12.96475600  | 2.60067900  | 0.10504600  |
| N | 12.50045100  | 3.66794600  | 0.11977000  |
| C | 15.01062700  | 1.41803200  | 0.10827700  |
| N | 16.16629000  | 1.55277600  | 0.12556300  |
| H | -1.01042300  | 2.30217100  | 0.01128200  |
| H | 1.01042400   | -2.30217200 | -0.01124000 |
| H | -0.79980500  | -1.65856600 | 2.48880300  |
| H | -0.97879900  | -2.96068500 | 4.55942000  |
| H | -3.24892800  | -5.95155300 | 2.49282100  |
| H | -3.05549700  | -4.66541100 | 0.41378900  |
| H | -3.08629000  | -1.88133900 | -2.45986500 |
| H | -2.72235000  | -3.16531500 | -4.51872200 |
| H | 0.04276700   | -5.70639400 | -2.45285000 |
| H | -0.33804700  | -4.44374700 | -0.38375300 |
| H | 3.05551900   | 4.66540500  | -0.41372200 |
| H | 3.24893300   | 5.95157100  | -2.49274100 |
| H | 0.97875600   | 2.96074500  | -4.55934900 |
| H | 0.79977900   | 1.65860300  | -2.48874600 |
| H | -2.06858100  | -4.74704100 | 5.83420200  |
| H | -3.16736200  | -5.88215800 | 5.03105900  |
| H | -1.42530900  | -6.14414800 | 4.96889900  |
| H | -1.79649300  | -6.19736300 | -4.93058900 |
| H | -1.30316100  | -4.73929900 | -5.79242700 |
| H | -0.09539500  | -5.73459700 | -4.96062500 |
| H | 1.42511500   | 6.14405200  | -4.96889800 |
| H | 3.16722900   | 5.88240600  | -5.03086800 |
| H | 2.06875500   | 4.74707400  | -5.83413000 |
| H | 0.09507200   | 5.73366800  | 4.96119300  |
| H | 1.30411800   | 4.73951000  | 5.79249500  |
| H | 1.79574500   | 6.19789700  | 4.93020600  |
| H | 0.33800200   | 4.44370400  | 0.38385600  |
| H | -0.04280800  | 5.70632000  | 2.45296800  |
| H | 2.72241900   | 3.16529800  | 4.51876700  |
| H | 3.08635400   | 1.88134900  | 2.45989100  |
| H | -10.83597800 | -1.89084000 | -0.05639400 |
| H | -15.72809100 | 0.88103100  | -0.07397800 |
| H | 10.83597900  | 1.89084100  | 0.05633500  |
| H | 15.72809600  | -0.88102600 | 0.07383800  |
| H | 8.84801000   | 2.99282900  | 0.05213800  |
| H | -8.84800700  | -2.99283000 | -0.05217500 |
| H | -14.50744400 | 4.97641300  | 0.00827300  |
| H | 14.50745200  | -4.97640900 | -0.00840800 |
| H | 12.07214900  | -4.28911600 | -0.02614800 |
| H | -12.07214200 | 4.28911700  | 0.02606800  |
| F | 16.46447100  | -3.31902000 | 0.04256500  |
| F | -16.46446300 | 3.31902600  | -0.04273500 |

## INIC1

|     |             |             |             |
|-----|-------------|-------------|-------------|
| 0 1 |             |             |             |
| C   | -0.80582800 | -1.13570900 | 0.01013600  |
| C   | -1.36512700 | 0.16445100  | 0.01031500  |
| C   | -0.56570500 | 1.31152100  | 0.00300700  |
| C   | 0.80583000  | 1.13570800  | -0.01012100 |
| C   | 1.36512900  | -0.16445200 | -0.01030100 |
| C   | 0.56570600  | -1.31152200 | -0.00299300 |
| C   | -1.89760700 | -2.21641500 | 0.00679900  |
| C   | 1.89761000  | 2.21641400  | -0.00677900 |
| C   | -2.79753800 | -0.00308500 | 0.01209600  |
| C   | -3.13810700 | -1.34038800 | -0.00440400 |
| C   | 2.79754000  | 0.00308300  | -0.01208600 |
| C   | 3.13810900  | 1.34038600  | 0.00441200  |
| C   | -1.91574600 | -3.05863800 | 1.28969100  |
| C   | -1.74545600 | -3.06170700 | -1.26267300 |
| C   | 1.91574300  | 3.05865200  | -1.28966100 |
| C   | -1.33986800 | -2.60084800 | 2.47613000  |
| C   | -1.44501800 | -3.33957200 | 3.65107500  |
| C   | -2.12804900 | -4.55690700 | 3.68593500  |
| C   | -2.71198100 | -5.00663100 | 2.49822900  |
| C   | -2.60883000 | -4.27370500 | 1.32159200  |
| C   | -2.40549400 | -2.72254900 | -2.44496200 |
| C   | -2.19544600 | -3.44897400 | -3.61351600 |
| C   | -1.31936600 | -4.53558100 | -3.64488400 |

|   |              |             |             |
|---|--------------|-------------|-------------|
| C | -0.65477000  | -4.86711800 | -2.46022100 |
| C | -0.86370100  | -4.14738500 | -1.28973100 |
| C | 2.60882100   | 4.27372200  | -1.32155000 |
| C | 2.71196600   | 5.00666300  | -2.49817900 |
| C | 2.12803000   | 4.55695100  | -3.68588700 |
| C | 1.44500600   | 3.33961000  | -3.65104000 |
| C | 1.33986400   | 2.60087300  | -2.47610500 |
| C | -2.21177600  | -5.36913500 | 4.94709600  |
| C | -1.11767800  | -5.33861200 | -4.89852500 |
| C | 2.21173800   | 5.36919600  | -4.94703900 |
| C | 1.11765700   | 5.33856400  | 4.89857100  |
| C | 0.86369600   | 4.14736300  | 1.28977700  |
| C | 0.65476600   | 4.86708200  | 2.46027000  |
| C | 1.31937500   | 4.53554000  | 3.64493000  |
| C | 2.19546800   | 3.44895000  | 3.61354500  |
| C | 2.40551600   | 2.72253400  | 2.44498000  |
| C | 1.74546400   | 3.06169100  | 1.26270400  |
| C | -10.48900300 | -0.84807600 | -0.03968700 |
| C | -11.47362500 | 0.11569000  | -0.03900900 |
| C | -11.24189200 | 1.57264700  | -0.01637000 |
| C | -12.57287400 | 2.20735400  | -0.02379100 |
| C | -13.56926100 | 1.21637300  | -0.04902000 |
| C | -12.90969300 | -0.11165400 | -0.06016200 |
| O | -10.16245400 | 2.14319500  | 0.00466500  |
| C | -13.58691400 | -1.31581800 | -0.08778600 |
| C | -12.91726700 | 3.54782600  | -0.00969500 |
| C | -14.25396000 | 3.92738400  | -0.01996300 |
| C | -15.23477200 | 2.93980000  | -0.04455700 |
| C | -14.91352600 | 1.58078100  | -0.05943500 |
| C | 10.48900600  | 0.84807400  | 0.03964900  |
| C | 11.47362800  | -0.11569100 | 0.03898200  |
| C | 11.24189600  | -1.57264900 | 0.01635000  |
| C | 12.57287800  | -2.20735500 | 0.02375700  |
| C | 13.56926500  | -1.21637300 | 0.04897400  |
| C | 12.90969600  | 0.11165400  | 0.06012700  |
| O | 10.16245800  | -2.14319700 | -0.00467400 |
| C | 13.58691600  | 1.31581800  | 0.08776400  |
| C | 12.91727200  | -3.54782700 | 0.00965800  |
| C | 14.25396600  | -3.92738400 | 0.01990800  |
| C | 15.23477700  | -2.93979900 | 0.04448700  |
| C | 14.91353100  | -1.58077900 | 0.05936900  |
| C | 4.53434000   | 1.51241600  | -0.00274800 |
| C | 5.22561500   | 0.28993700  | -0.01571600 |
| S | 4.14910900   | -1.07514100 | -0.03379700 |
| S | 5.59982200   | 2.89027700  | 0.02214900  |
| C | 6.98124200   | 1.81902600  | 0.02058300  |
| C | 6.62101500   | 0.46007100  | -0.00269000 |
| C | -4.53433800  | -1.51241800 | 0.00275000  |
| C | -5.22561300  | -0.28993900 | 0.01571800  |
| S | -4.14910700  | 1.07513900  | 0.03380800  |
| S | -5.59982000  | -2.89027900 | -0.02216500 |
| C | -6.98124000  | -1.81902800 | -0.02060600 |
| C | -6.62101300  | -0.46007300 | 0.00267800  |
| C | 8.35634200   | 2.01558500  | 0.03393500  |
| C | 9.07665900   | 0.81213300  | 0.02385900  |
| S | 7.99199300   | -0.58288100 | -0.00599200 |
| C | -8.35634000  | -2.01558700 | -0.03397200 |
| C | -9.07665700  | -0.81213500 | -0.02389000 |
| S | -7.99199100  | 0.58287800  | 0.00597900  |
| C | -12.95495100 | -2.59193600 | -0.10056400 |
| N | -12.48684600 | -3.65769400 | -0.11205600 |
| C | -15.00644400 | -1.42704300 | -0.10785800 |
| N | -16.15971700 | -1.58155400 | -0.12530200 |
| C | 12.95495200  | 2.59193500  | 0.10056800  |
| N | 12.48684800  | 3.65769300  | 0.11209000  |
| C | 15.00644600  | 1.42704400  | 0.10782700  |
| N | 16.15971900  | 1.58155700  | 0.12526300  |
| H | -1.00742600  | 2.30350900  | 0.00934000  |
| H | 1.00742800   | -2.30351100 | -0.00932900 |
| H | -0.80372800  | -1.65693300 | 2.48922500  |
| H | -0.98488200  | -2.95888400 | 4.55973800  |
| H | -3.25669400  | -5.94772400 | 2.49204500  |
| H | -3.06107200  | -4.66174500 | 0.41307200  |
| H | -3.08844500  | -1.87808200 | -2.46042000 |
| H | -2.72494900  | -3.16254100 | -4.51902700 |
| H | 0.03751200   | -5.70568300 | -2.45211000 |
| H | -0.34291600  | -4.44260700 | -0.38325900 |
| H | 3.06106800   | 4.66175200  | -0.41302700 |
| H | 3.25667600   | 5.94775700  | -2.49198600 |
| H | 0.98487000   | 2.95893000  | -4.55970600 |



|   |              |             |             |
|---|--------------|-------------|-------------|
| H | 0.80373100   | 1.65695400  | -2.48920800 |
| H | -2.07693200  | -4.74431400 | 5.83397800  |
| H | -3.17609800  | -5.87864600 | 5.03023400  |
| H | -1.43417500  | -6.14182600 | 4.96895300  |
| H | -1.80109200  | -6.19548400 | -4.93040000 |
| H | -1.30671000  | -4.73771900 | -5.79217400 |
| H | -0.09972700  | -5.73365400 | -4.95999900 |
| H | 1.43397400   | 6.14172000  | -4.96899000 |
| H | 3.17596200   | 5.87890900  | -5.03006400 |
| H | 2.07712800   | 4.74434600  | -5.83393700 |
| H | 0.09940100   | 5.73275400  | 4.96051400  |
| H | 1.30764800   | 4.73794900  | 5.79220000  |
| H | 1.80034700   | 6.19603000  | 4.92997500  |
| H | 0.34290300   | 4.44258700  | 0.38331000  |
| H | -0.03752600  | 5.70564000  | 2.45217000  |
| H | 2.72498400   | 3.16251800  | 4.51904800  |
| H | 3.08847900   | 1.87807600  | 2.46042800  |
| H | -10.83517700 | -1.87676400 | -0.05639600 |
| H | -15.71017600 | 0.85007600  | -0.07832500 |
| H | 10.83517900  | 1.87676300  | 0.05634300  |
| H | 15.71018000  | -0.85007400 | 0.07824500  |
| H | 8.85216300   | 2.97948600  | 0.05182200  |
| H | -8.85216100  | -2.97948800 | -0.05186800 |
| H | -14.51005000 | 4.98117300  | -0.00870200 |
| H | -16.27889700 | 3.23543100  | -0.05235700 |
| H | 16.27890200  | -3.23542900 | 0.05227200  |
| H | 14.51005600  | -4.98117200 | 0.00864600  |
| F | -11.97171000 | 4.48422000  | 0.01358900  |
| F | 11.97171500  | -4.48422100 | -0.01361000 |

## INIC3

|     |              |             |             |
|-----|--------------|-------------|-------------|
| 0 1 |              |             |             |
| C   | -0.77392400  | 1.15767800  | -0.01365300 |
| C   | -1.36927000  | -0.12636300 | -0.00791200 |
| C   | -0.60196800  | -1.29513600 | 0.00247800  |
| C   | 0.77391700   | -1.15776100 | 0.01295200  |
| C   | 1.36925700   | 0.12628300  | 0.00722600  |
| C   | 0.60195900   | 1.29505500  | -0.00317200 |
| C   | -1.83491500  | 2.26846000  | -0.01385000 |
| C   | 1.83492400   | -2.26853300 | 0.01314600  |
| C   | -2.79648100  | 0.08115600  | -0.00753800 |
| C   | -3.09935600  | 1.42758100  | 0.00520800  |
| C   | 2.79646900   | -0.08122000 | 0.00694500  |
| C   | 3.09935800   | -1.42764100 | -0.00577100 |
| C   | -1.83334200  | 3.10322100  | -1.30198800 |
| C   | -1.65581200  | 3.11798800  | 1.24924700  |
| C   | 1.83327700   | -3.10340100 | 1.30121700  |
| C   | -1.27076200  | 2.62485800  | -2.48666900 |
| C   | -1.35923300  | 3.35976200  | -3.66546700 |
| C   | -2.01185700  | 4.59345800  | -3.70612900 |
| C   | -2.58243000  | 5.06408600  | -2.52001900 |
| C   | -2.49563000  | 4.33518700  | -1.33961600 |
| C   | -2.32300400  | 2.80726800  | 2.43532800  |
| C   | -2.08950200  | 3.53644800  | 3.59777500  |
| C   | -1.18215200  | 4.59731500  | 3.61897800  |
| C   | -0.51078100  | 4.90033100  | 2.43047000  |
| C   | -0.74314200  | 4.17800300  | 1.26605000  |
| C   | 2.49546300   | -4.33542200 | 1.33876500  |
| C   | 2.58219100   | -5.06440800 | 2.51912100  |
| C   | 2.01164700   | -4.59381600 | 3.70525700  |
| C   | 1.35913400   | -3.36005700 | 3.66467700  |
| C   | 1.27073400   | -2.62506700 | 2.48592900  |
| C   | -2.07752100  | 5.40064700  | -4.97158500 |
| C   | -0.95438700  | 5.40386300  | 4.86588100  |
| C   | 2.07721300   | -5.40110300 | 4.97065600  |
| C   | 0.95476800   | -5.40358800 | -4.86687800 |
| C   | 0.74320000   | -4.17793900 | -1.26700500 |
| C   | 0.51094000   | -4.90018400 | -2.43148700 |
| C   | 1.18245900   | -4.59711900 | -3.61991100 |
| C   | 2.08984400   | -3.53629800 | -3.59854000 |
| C   | 2.32325100   | -2.80719600 | -2.43601500 |
| C   | 1.65592100   | -3.11795700 | -1.25003500 |
| C   | -10.46096300 | 1.13711300  | 0.04726300  |
| C   | -11.46623400 | 0.19531300  | 0.04431100  |
| C   | -11.27473400 | -1.26532400 | 0.01768800  |
| C   | -12.62061300 | -1.86992800 | 0.01766900  |
| C   | -13.58584800 | -0.85501000 | 0.04507500  |
| C   | -12.89942800 | 0.45583800  | 0.06378800  |

|   |              |             |             |
|---|--------------|-------------|-------------|
| O | -10.21911600 | -1.87996400 | -0.00136500 |
| C | -13.55064900 | 1.67332100  | 0.09605100  |
| C | -12.94044500 | -3.21761800 | -0.00514400 |
| C | -14.28433500 | -3.54459700 | 0.00016200  |
| C | -15.26218900 | -2.54395700 | 0.02794400  |
| C | -14.93932900 | -1.19714900 | 0.05047700  |
| C | 10.46097000  | -1.13706000 | -0.04669800 |
| C | 11.46622400  | -0.19524300 | -0.04367600 |
| C | 11.27469900  | 1.26538900  | -0.01693100 |
| C | 12.62057000  | 1.87001200  | -0.01665000 |
| C | 13.58582300  | 0.85511100  | -0.04408100 |
| C | 12.89942300  | -0.45574500 | -0.06303300 |
| O | 10.21907000  | 1.88001300  | 0.00202200  |
| C | 13.55066200  | -1.67321600 | -0.09542000 |
| C | 12.94037900  | 3.21770300  | 0.00638500  |
| C | 14.28426400  | 3.54470300  | 0.00128800  |
| C | 15.26213700  | 2.54408100  | -0.02651800 |
| C | 14.93930000  | 1.19727100  | -0.04927500 |
| C | 4.49025300   | -1.63868300 | -0.00095700 |
| C | 5.21531100   | -0.43588500 | 0.00742400  |
| S | 4.17779000   | 0.95882000  | 0.02339200  |
| S | 5.51690200   | -3.04566000 | -0.02399700 |
| C | 6.92761400   | -2.01351400 | -0.02664900 |
| C | 6.60519800   | -0.64514400 | -0.00653800 |
| C | -4.49024800  | 1.63864000  | 0.00052900  |
| C | -5.21532400  | 0.43585300  | -0.00777200 |
| S | -4.17782100  | -0.95886800 | -0.02385500 |
| S | -5.51687200  | 3.04563300  | 0.02382500  |
| C | -6.92759600  | 2.01350800  | 0.02670400  |
| C | -6.60520500  | 0.64513300  | 0.00648300  |
| C | 8.29691100   | -2.24822400 | -0.03982400 |
| C | 9.05003400   | -1.06528600 | -0.03193300 |
| S | 8.00415600   | 0.35944000  | -0.00516900 |
| C | -8.29688700  | 2.24824100  | 0.04011900  |
| C | -9.05003000  | 1.06531500  | 0.03232100  |
| S | -8.00418000  | -0.35942500 | 0.00535500  |
| F | -14.68183700 | -4.81269000 | -0.02082800 |
| F | -16.53797900 | -2.92003900 | 0.03202100  |
| F | 16.53792100  | 2.92018300  | -0.03039000 |
| F | 14.68174500  | 4.81279800  | 0.02250600  |
| C | -12.89417700 | 2.93673200  | 0.11686100  |
| N | -12.40470100 | 3.99262500  | 0.13492900  |
| C | -14.96859100 | 1.80262500  | 0.11362900  |
| N | -16.12153800 | 1.95928600  | 0.12911700  |
| C | 12.89420300  | -2.93663000 | -0.11646100 |
| N | 12.40474600  | -3.99252800 | -0.13471000 |
| C | 14.96860600  | -1.80250300 | -0.11289600 |
| N | 16.12155400  | -1.95916400 | -0.12830100 |
| H | -1.07115700  | -2.27437600 | 0.00043300  |
| H | 1.07114500   | 2.27429700  | -0.00110500 |
| H | -0.75843700  | 1.66777000  | -2.49560800 |
| H | -0.91003100  | 2.96290000  | -4.57268100 |
| H | -3.10337000  | 6.01855300  | -2.51809200 |
| H | -2.93656100  | 4.73965100  | -0.43270900 |
| H | -3.03024900  | 1.98320700  | 2.45866000  |
| H | -2.62522800  | 3.27275900  | 4.50651600  |
| H | 0.20535200   | 5.71849800  | 2.41456000  |
| H | -0.21637900  | 4.45113000  | 0.35609600  |
| H | 2.93637700   | -4.73985700 | 0.43183600  |
| H | 3.10305400   | -6.01891800 | 2.51713400  |
| H | 0.90996400   | -2.96321600 | 4.57191700  |
| H | 0.75849800   | -1.66793100 | 2.49493000  |
| H | -1.95912900  | 4.76801700  | -5.85526300 |
| H | -3.02928600  | 5.93298900  | -5.05625500 |
| H | -1.28145600  | 6.15413400  | -4.99850600 |
| H | -1.61242900  | 6.28054500  | 4.89234500  |
| H | -1.15884000  | 4.81576200  | 5.76462100  |
| H | 0.07477600   | 5.76952300  | 4.92214300  |
| H | 1.28090800   | -6.15433400 | 4.99762900  |
| H | 3.02881900   | -5.93375200 | 5.05517800  |
| H | 1.95912500   | -4.76848900 | 5.85438800  |
| H | -0.07470900  | -5.76827600 | -4.92378700 |
| H | 1.16037200   | -4.81578200 | -5.76554500 |
| H | 1.61198100   | -6.28090800 | -4.89279700 |
| H | 0.21633300   | -4.45110400 | -0.35712300 |
| H | -0.20523100  | -5.71832100 | -2.41571000 |
| H | 2.62568900   | -3.27257400 | -4.50720100 |
| H | 3.03053100   | -1.98316300 | -2.45922800 |
| H | -10.78319900 | 2.17361200  | 0.06398700  |
| H | -12.17584600 | -3.98661600 | -0.02642500 |

|   |              |             |             |
|---|--------------|-------------|-------------|
| H | -15.74724100 | -0.47761400 | 0.07074000  |
| H | 10.78322500  | -2.17355400 | -0.06337300 |
| H | 12.17576500  | 3.98668600  | 0.02767400  |
| H | 15.74722500  | 0.47775200  | -0.06954500 |
| H | 8.76571000   | -3.22560800 | -0.05552400 |
| H | -8.76566800  | 3.22563200  | 0.05591900  |

## IPIC

0.1

|   |             |             |             |
|---|-------------|-------------|-------------|
| C | 12.46777600 | 3.39962300  | -0.19575200 |
| C | 13.47026700 | 2.41900300  | -0.20742800 |
| C | 14.80723300 | 2.81522700  | -0.24050400 |
| C | 15.09634400 | 4.18059600  | -0.26053600 |
| C | 14.08635100 | 5.14406200  | -0.24861400 |
| C | 12.74855400 | 4.75471100  | -0.21581600 |
| C | 11.14542400 | 2.74285400  | -0.15845300 |
| C | 11.39074200 | 1.29125400  | -0.14676900 |
| C | 12.82816700 | 1.08302200  | -0.17865900 |
| C | 13.52408400 | -0.11366900 | -0.18345100 |
| O | 10.06504100 | 3.31588800  | -0.14036000 |
| C | -0.98010200 | 0.99660500  | 0.37733100  |
| C | -1.31776100 | -0.37456200 | 0.34662000  |
| C | -0.34802000 | -1.38199800 | 0.34944200  |
| C | 0.98010300  | -0.99663300 | 0.37728100  |
| C | 1.31776200  | 0.37453500  | 0.34666800  |
| C | 0.34802100  | 1.38197100  | 0.34954200  |
| C | -2.24468900 | 1.88229100  | 0.37846600  |
| C | 2.24468900  | -1.88232000 | 0.37838000  |
| C | -6.55627300 | -0.63065300 | -0.01537400 |
| C | -6.94217200 | 0.73012600  | -0.00670200 |
| C | -8.31718900 | 0.90720200  | -0.03924300 |
| C | -9.01342500 | -0.31489900 | -0.07452700 |
| S | -7.90494600 | -1.70092500 | -0.06711100 |
| N | -5.82794900 | 1.54337400  | 0.05780200  |
| C | -2.75204200 | -0.44522800 | 0.25529700  |
| C | -3.32315900 | 0.81290100  | 0.23184800  |
| C | -4.73087700 | 0.71289300  | 0.09531700  |
| C | -5.16462000 | -0.63782800 | 0.04279100  |
| S | -3.85602400 | -1.77339300 | 0.13368500  |
| C | -5.88442200 | 2.99777000  | 0.01823600  |
| C | 6.55627800  | 0.63064900  | -0.01525700 |
| C | 6.94217800  | -0.73013000 | -0.00666900 |
| C | 8.31719500  | -0.90720300 | -0.03921500 |
| C | 9.01343100  | 0.31490000  | -0.07442300 |
| S | 7.90495000  | 1.70092600  | -0.06692500 |
| N | 5.82795500  | -1.54338300 | 0.05777400  |
| C | 2.75204500  | 0.44520700  | 0.25537000  |
| C | 3.32316200  | -0.81292100 | 0.23184700  |
| C | 4.73088200  | -0.71290400 | 0.09533600  |
| C | 5.16462500  | 0.63782000  | 0.04289800  |
| S | 3.85602800  | 1.77337900  | 0.13384700  |
| C | 5.88443100  | -2.99777700 | 0.01812600  |
| C | -2.21863500 | 2.80844000  | -0.84927200 |
| C | -2.34249200 | 2.60616600  | 1.73185400  |
| C | 2.34246900  | -2.60627700 | 1.73172600  |
| C | -2.24233500 | 4.19873900  | -0.77965400 |
| C | -2.19094100 | 4.97394400  | -1.94062500 |
| C | -2.12641800 | 4.39119100  | -3.20381200 |
| C | -2.11494100 | 2.99131000  | -3.26995000 |
| C | -2.15538700 | 2.21845700  | -2.11998600 |
| C | -3.35951700 | 2.32728400  | 2.64639600  |
| C | -3.41068100 | 2.95906300  | 3.88840700  |
| C | -2.44768500 | 3.89058100  | 4.26957600  |
| C | -1.42118400 | 4.16421800  | 3.35849400  |
| C | -1.36720700 | 3.53622900  | 2.12225800  |
| C | 1.36714700  | -3.53632500 | 2.12207900  |
| C | 1.42111100  | -4.16440000 | 3.35826900  |
| C | 2.44763200  | -3.89086200 | 4.26936300  |
| C | 3.41066700  | -2.95936800 | 3.88824200  |
| C | 3.35951500  | -2.32750200 | 2.64627200  |
| C | -2.06400800 | 5.22247600  | -4.45344900 |
| C | -2.50404700 | 4.58345200  | 5.60105300  |
| C | 2.50391900  | -4.58376500 | 5.60082600  |
| C | -5.81731200 | 3.62639500  | -1.38458300 |
| C | -6.62579700 | 2.85877200  | -2.42616300 |
| C | 5.81735600  | -3.62632300 | -1.38473000 |
| C | 6.62587200  | -2.85864800 | -2.42624600 |

|   |              |             |             |
|---|--------------|-------------|-------------|
| C | 2.06406400   | -5.22223000 | -4.45372700 |
| C | 2.24232400   | -4.19869900 | -0.77987200 |
| C | 2.19094600   | -4.97383900 | -1.94088700 |
| C | 2.12646700   | -4.39101500 | -3.20404400 |
| C | 2.11501800   | -2.99112900 | -3.27010300 |
| C | 2.15544800   | -2.21834100 | -2.12009500 |
| C | 2.21865200   | -2.80839600 | -0.84941400 |
| C | 10.42042100  | 0.30751300  | -0.10953100 |
| C | -10.42041600 | -0.30750600 | -0.10963300 |
| C | -12.46779900 | -3.39959600 | -0.19597400 |
| C | -13.47028100 | -2.41896600 | -0.20760000 |
| C | -14.80725100 | -2.81517600 | -0.24066700 |
| C | -15.09637400 | -4.18054200 | -0.26074100 |
| C | -14.08639000 | -5.14401800 | -0.24887000 |
| C | -12.74858900 | -4.75468100 | -0.21608100 |
| C | -11.14544000 | -2.74284100 | -0.15867200 |
| C | -11.39074300 | -1.29124000 | -0.14691900 |
| C | -12.82816700 | -1.08299300 | -0.17879200 |
| C | -13.52406800 | 0.11370700  | -0.18354100 |
| O | -10.06506200 | -3.31588700 | -0.14061200 |
| C | 12.91498800  | -1.39992100 | -0.15646100 |
| N | 12.46623600  | -2.47430000 | -0.13494300 |
| C | 14.94453400  | -0.19981200 | -0.21663300 |
| N | 16.10063500  | -0.33344900 | -0.24299400 |
| C | -5.35039300  | 8.36254900  | 0.57297300  |
| C | -6.05531500  | 7.44330000  | -0.41618300 |
| C | -5.58204400  | 5.99507500  | -0.32877700 |
| C | -6.29818700  | 5.08296400  | -1.32145100 |
| C | 5.35035100   | -8.36258500 | 0.57254700  |
| C | 6.05531100   | -7.44328300 | -0.41653200 |
| C | 5.58204000   | -5.99506100 | -0.32906500 |
| C | 6.29822100   | -5.08289900 | -1.32166400 |
| C | -12.91495400 | 1.39994900  | -0.15651700 |
| N | -12.46618200 | 2.47432000  | -0.13497700 |
| C | -14.94451800 | 0.19987100  | -0.21670600 |
| N | -16.10061700 | 0.33352900  | -0.24304900 |
| H | 15.62096400  | 2.10215200  | -0.25064200 |
| H | 11.94004000  | 5.47904300  | -0.20565300 |
| H | -0.64196200  | -2.42503400 | 0.29416200  |
| H | 0.64196500   | 2.42501100  | 0.29433900  |
| H | -8.84024800  | 1.85658000  | -0.03730300 |
| H | -6.82403400  | 3.28099600  | 0.50707100  |
| H | -5.07579400  | 3.38003000  | 0.64672900  |
| H | 8.84025500   | -1.85658100 | -0.03733400 |
| H | 6.82403100   | -3.28103000 | 0.50696700  |
| H | 5.07578800   | -3.38007400 | 0.64657700  |
| H | -2.31167400  | 4.69806700  | 0.18053800  |
| H | -2.20777900  | 6.05771400  | -1.85224800 |
| H | -2.07061900  | 2.50113500  | -4.23968600 |
| H | -2.14046600  | 1.13480100  | -2.20584400 |
| H | -4.12201500  | 1.59381900  | 2.40682100  |
| H | -4.21783400  | 2.71208800  | 4.57359300  |
| H | -0.64618200  | 4.87929600  | 3.62384300  |
| H | -0.55043200  | 3.78423200  | 1.45320600  |
| H | 0.55036100   | -3.78425600 | 1.45301400  |
| H | 0.64608600   | -4.87947000 | 3.62357300  |
| H | 4.21784700   | -2.71248600 | 4.57342900  |
| H | 4.12205000   | -1.59406200 | 2.40673400  |
| H | -2.19189200  | 6.28510300  | -4.23281600 |
| H | -1.10099100  | 5.09939500  | -4.96150300 |
| H | -2.84162600  | 4.92748900  | -5.16556400 |
| H | -2.73278600  | 5.64856000  | 5.48201000  |
| H | -3.27184300  | 4.14783600  | 6.24515000  |
| H | -1.54427600  | 4.51789100  | 6.12346100  |
| H | 2.73140300   | -5.64912900 | 5.48170100  |
| H | 3.27251100   | -4.14896600 | 6.24452300  |
| H | 1.54448600   | -4.51712000 | 6.12372600  |
| H | -4.76670900  | 3.61951500  | -1.70117200 |
| H | -6.51617500  | 3.33517500  | -3.40540400 |
| H | -6.29104600  | 1.82200000  | -2.52267700 |
| H | -7.69475000  | 2.84959900  | -2.18368100 |
| H | 4.76676200   | -3.61942000 | -1.70134800 |
| H | 6.51627600   | -3.33499900 | -3.40551600 |
| H | 6.29112700   | -1.82187000 | -2.52271500 |
| H | 7.69481900   | -2.84949100 | -2.18373300 |
| H | 2.19203700   | -6.28486100 | -4.23316200 |
| H | 1.10101200   | -5.09919300 | -4.96172700 |
| H | 2.84162500   | -4.92714200 | -5.16586100 |
| H | 2.31162900   | -4.69808200 | 0.18029400  |
| H | 2.20776300   | -6.05761400 | -1.85257000 |

|   |              |             |             |
|---|--------------|-------------|-------------|
| H | 2.07073200   | -2.50090000 | -4.23981300 |
| H | 2.14055000   | -1.13467900 | -2.20589300 |
| H | 10.78877100  | -0.71353500 | -0.10451900 |
| H | -10.78876200 | 0.71354400  | -0.10456400 |
| H | -15.62097500 | -2.10209400 | -0.25076500 |
| H | -11.94008200 | -5.47902100 | -0.20595700 |
| H | -5.70964500  | 9.39303100  | 0.49061600  |
| H | -5.51624600  | 8.03392000  | 1.60495600  |
| H | -4.26820500  | 8.37280300  | 0.40095700  |
| H | -5.89831600  | 7.81163500  | -1.43892400 |
| H | -7.13965800  | 7.48023000  | -0.24523200 |
| H | -5.73192700  | 5.63799800  | 0.69931100  |
| H | -4.50051500  | 5.95528200  | -0.51176800 |
| H | -6.20048800  | 5.51215500  | -2.32762400 |
| H | -7.37620300  | 5.08431900  | -1.09868300 |
| H | 5.70960300   | -9.39306300 | 0.49014600  |
| H | 5.51616700   | -8.03401300 | 1.60455400  |
| H | 4.26816900   | -8.37282700 | 0.40049100  |
| H | 5.89834900   | -7.81156200 | -1.43930000 |
| H | 7.13964800   | -7.48022500 | -0.24554400 |
| H | 5.73188900   | -5.63804100 | 0.69904800  |
| H | 4.50051800   | -5.95525700 | -0.51209100 |
| H | 6.20055200   | -5.51203300 | -2.32786400 |
| H | 7.37623000   | -5.08427100 | -1.09886200 |
| H | -14.34728900 | -6.19766700 | -0.26515700 |
| H | -16.13481200 | -4.49630700 | -0.28615800 |
| H | 16.13477800  | 4.49637100  | -0.28595900 |
| H | 14.34723900  | 6.19771300  | -0.26486800 |

## IPIC-4F

0 1

|   |             |             |             |
|---|-------------|-------------|-------------|
| C | 12.64276000 | 2.67423600  | -0.03929300 |
| C | 13.58848100 | 1.64167600  | -0.01948900 |
| C | 14.94758000 | 1.95851900  | -0.02048400 |
| C | 15.29582900 | 3.29975400  | -0.04126500 |
| C | 14.33753300 | 4.31781900  | -0.06095800 |
| C | 12.98724700 | 4.01523500  | -0.06014900 |
| C | 11.28495700 | 2.09257600  | -0.03338100 |
| C | 11.45053700 | 0.63131000  | -0.01020500 |
| C | 12.87373900 | 0.34378700  | 0.00017100  |
| C | 13.50638300 | -0.88681900 | 0.02587700  |
| O | 10.24213000 | 2.73013400  | -0.04611400 |
| C | -0.91918800 | 1.05324900  | 0.27248300  |
| C | -1.33752600 | -0.29550200 | 0.24665100  |
| C | -0.42946300 | -1.35887900 | 0.24617100  |
| C | 0.91918800  | -1.05326000 | 0.27243200  |
| C | 1.33752600  | 0.29549200  | 0.24669100  |
| C | 0.42946400  | 1.35886900  | 0.24626300  |
| C | -2.12860700 | 2.01324000  | 0.27835700  |
| C | 2.12860600  | -2.01325200 | 0.27826800  |
| C | -6.58690200 | -0.24599100 | -0.00662500 |
| C | -6.89311900 | 1.13537000  | 0.00562200  |
| C | -8.25525900 | 1.39202000  | 0.00644100  |
| C | -9.02233300 | 0.21151200  | -0.00593900 |
| S | -7.99539800 | -1.23665600 | -0.02060300 |
| N | -5.73221600 | 1.88241900  | 0.03903300  |
| C | -2.77435600 | -0.28141200 | 0.17555400  |
| C | -3.27117000 | 1.00833900  | 0.15959400  |
| C | -4.68484300 | 0.98987700  | 0.05407500  |
| C | -5.19747900 | -0.33389700 | 0.01756700  |
| S | -3.95557000 | -1.54367200 | 0.08303100  |
| C | -5.70516300 | 3.33748500  | -0.00843000 |
| C | 6.58690600  | 0.24599700  | -0.00652800 |
| C | 6.89312400  | -1.13536400 | 0.00564200  |
| C | 8.25526300  | -1.39201300 | 0.00645900  |
| C | 9.02233700  | -0.21150500 | -0.00585000 |
| S | 7.99540100  | 1.23666400  | -0.02044500 |
| N | 5.73222000  | -1.88241600 | 0.03899700  |
| C | 2.77435800  | 0.28140600  | 0.17561500  |
| C | 3.27117200  | -1.00834300 | 0.15958600  |
| C | 4.68484600  | -0.98987600 | 0.05408400  |
| C | 5.19748300  | 0.33390100  | 0.01765800  |
| S | 3.95557200  | 1.54367200  | 0.08317700  |
| C | 5.70517100  | -3.33748000 | -0.00853400 |
| C | -2.06740900 | 2.91925700  | -0.96404300 |
| C | -2.16102900 | 2.76055700  | 1.62143100  |
| C | 2.16100300  | -2.76065200 | 1.62129600  |
| C | -2.02769300 | 4.31014400  | -0.91527800 |

|   |              |             |             |
|---|--------------|-------------|-------------|
| C | -1.95137900  | 5.06540400  | -2.08784000 |
| C | -1.92425100  | 4.46215000  | -3.34270900 |
| C | -1.97780500  | 3.06249000  | -3.38798500 |
| C | -2.04284700  | 2.30892500  | -2.22637200 |
| C | -3.16469400  | 2.53939400  | 2.56590000  |
| C | -3.15557200  | 3.19024900  | 3.79906600  |
| C | -2.14338700  | 4.08401400  | 4.14152200  |
| C | -1.13004400  | 4.29900800  | 3.20059900  |
| C | -1.13620500  | 3.65214600  | 1.97299000  |
| C | 1.13616400   | -3.65225300 | 1.97278700  |
| C | 1.12998900   | -4.29920400 | 3.20034600  |
| C | 2.14332900   | -4.08428600 | 4.14129400  |
| C | 3.15553000   | -3.19051800 | 3.79890400  |
| C | 3.16466600   | -2.53957200 | 2.56578300  |
| C | -1.83201600  | 5.27175300  | -4.60461300 |
| C | -2.13630200  | 4.79866500  | 5.46253400  |
| C | 2.13617600   | -4.79897900 | 5.46228300  |
| C | -5.63821400  | 3.95335900  | -1.41712200 |
| C | -6.51467500  | 3.22629100  | -2.43258500 |
| C | 5.63824600   | -3.95329100 | -1.41725500 |
| C | 6.51473700   | -3.22619100 | -2.43266800 |
| C | 1.83209700   | -5.27148400 | -4.60489500 |
| C | 2.02770000   | -4.31008400 | -0.91550200 |
| C | 1.95140700   | -5.06527700 | -2.08810700 |
| C | 1.92431000   | -4.46195300 | -3.34294300 |
| C | 1.97787600   | -3.06229100 | -3.38813900 |
| C | 2.04289800   | -2.30879100 | -2.22648200 |
| C | 2.06742800   | -2.91919400 | -0.96418800 |
| C | 10.42585300  | -0.29822000 | -0.00218200 |
| C | -10.42584900 | 0.29822700  | -0.00227500 |
| C | -12.64275000 | -2.67423000 | -0.03950600 |
| C | -13.58847300 | -1.64167300 | -0.01965700 |
| C | -14.94757200 | -1.95851900 | -0.02065200 |
| C | -15.29581800 | -3.29975500 | -0.04147800 |
| C | -14.33752000 | -4.31781700 | -0.06121800 |
| C | -12.98723500 | -4.01523000 | -0.06040900 |
| C | -11.28494900 | -2.09256800 | -0.03357700 |
| C | -11.45053200 | -0.63130400 | -0.01034600 |
| C | -12.87373400 | -0.34378400 | 0.00004200  |
| C | -13.50638400 | 0.88681900  | 0.02578100  |
| O | -10.24212000 | -2.73012300 | -0.04634900 |
| C | 12.83057100  | -2.13920300 | 0.04808600  |
| N | 12.32529200  | -3.18806400 | 0.06708700  |
| C | 14.92119900  | -1.04035300 | 0.03431100  |
| N | 16.07160400  | -1.21787600 | 0.04217000  |
| C | -4.85714900  | 8.67147600  | 0.48434700  |
| C | -5.65001200  | 7.78238400  | -0.46500400 |
| C | -5.23644400  | 6.31498800  | -0.39535200 |
| C | -6.03606800  | 5.43459600  | -1.35222500 |
| C | 4.85706800   | -8.67147700 | 0.48399500  |
| C | 5.64996400   | -7.78235600 | -0.46530100 |
| C | 5.23641700   | -6.31495700 | -0.39559600 |
| C | 6.03607700   | -5.43453700 | -1.35241200 |
| C | -12.83057700 | 2.13920600  | 0.04801500  |
| N | -12.32530700 | 3.18807100  | 0.06702700  |
| C | -14.92119900 | 1.04034700  | 0.03422700  |
| N | -16.07160600 | 1.21786100  | 0.04209500  |
| H | 15.74206000  | 1.22403800  | -0.00624400 |
| H | 12.23672800  | 4.79818500  | -0.07518400 |
| H | -0.78497500  | -2.38256800 | 0.19598500  |
| H | 0.78497700   | 2.38256100  | 0.19614600  |
| H | -8.72098200  | 2.37072100  | 0.01730100  |
| H | -6.61401000  | 3.67724600  | 0.50209400  |
| H | -4.85992900  | 3.67449800  | 0.59730600  |
| H | 8.72098700   | -2.37071400 | 0.01727000  |
| H | 6.61401100   | -3.67726200 | 0.50198900  |
| H | 4.85992900   | -3.67452200 | 0.59717300  |
| H | -2.06601000  | 4.82638300  | 0.03757300  |
| H | -1.91845300  | 6.14996600  | -2.01525800 |
| H | -1.96525400  | 2.55682400  | -4.35064900 |
| H | -2.07842500  | 1.22463000  | -2.29680200 |
| H | -3.96473700  | 1.83699100  | 2.35707700  |
| H | -3.95450200  | 2.98829100  | 4.50823100  |
| H | -0.31766700  | 4.98288700  | 3.43461900  |
| H | -0.32808300  | 3.85656700  | 1.27905900  |
| H | 0.32804900   | -3.85662300 | 1.27883300  |
| H | 0.31760800   | -4.98309800 | 3.43430800  |
| H | 3.95446700   | -2.98863300 | 4.50808100  |
| H | 3.96472800   | -1.83717500 | 2.35701000  |
| H | -1.94134200  | 6.34012200  | -4.40236400 |

|   |              |             |             |
|---|--------------|-------------|-------------|
| H | -0.86547400  | 5.12247100  | -5.09902500 |
| H | -2.60664000  | 4.98017900  | -5.32116100 |
| H | -2.33659900  | 5.86829800  | 5.33295900  |
| H | -2.89631700  | 4.39718300  | 6.13738900  |
| H | -1.16293400  | 4.71201800  | 5.95580600  |
| H | 2.33530700   | -5.86881100 | 5.33257900  |
| H | 2.89691600   | -4.39827800 | 6.13678300  |
| H | 1.16313500   | -4.71135300 | 5.95603800  |
| H | -4.59797000  | 3.88549400  | -1.75963600 |
| H | -6.40412500  | 3.69077500  | -3.41739500 |
| H | -6.24052300  | 2.17203800  | -2.53109900 |
| H | -7.57585000  | 3.27787300  | -2.16285900 |
| H | 4.59800900   | -3.88539800 | -1.75978800 |
| H | 6.40420600   | -3.69063500 | -3.41749900 |
| H | 6.24059700   | -2.17193200 | -2.53114700 |
| H | 7.57590500   | -3.27779300 | -2.16292000 |
| H | 1.94142100   | -6.33986400 | -4.40270500 |
| H | 0.86556100   | -5.12217500 | -5.09931300 |
| H | 2.60673100   | -4.97986800 | -5.32141400 |
| H | 2.06598900   | -4.82637600 | 0.03732100  |
| H | 1.91847000   | -6.14984300 | -2.01558700 |
| H | 1.96534900   | -2.55657100 | -4.35077500 |
| H | 2.07848600   | -1.22449200 | -2.29685000 |
| H | 10.73795400  | -1.33779400 | 0.01021900  |
| H | -10.73795000 | 1.33780100  | 0.01017600  |
| H | -15.74205300 | -1.22404100 | -0.00637800 |
| H | -12.23671400 | -4.79817700 | -0.07547900 |
| H | -5.17374500  | 9.71679100  | 0.41514000  |
| H | -4.98647400  | 8.35294100  | 1.52469200  |
| H | -3.78537600  | 8.63281200  | 0.25931800  |
| H | -5.52837300  | 8.14193100  | -1.49563000 |
| H | -6.72180600  | 7.86667100  | -0.24032700 |
| H | -5.35454400  | 5.96565500  | 0.63946800  |
| H | -4.16712400  | 6.22825000  | -0.62744400 |
| H | -5.95174200  | 5.84959300  | -2.36546300 |
| H | -7.10378500  | 5.49632500  | -1.09141200 |
| H | 5.17364800   | -9.71679400 | 0.41474900  |
| H | 4.98637800   | -8.35299000 | 1.52435800  |
| H | 3.78530000   | -8.63278500 | 0.25894800  |
| H | 5.52834200   | -8.14185800 | -1.49594500 |
| H | 6.72175200   | -7.86666900 | -0.24060600 |
| H | 5.35449700   | -5.96567000 | 0.63924200  |
| H | 4.16710300   | -6.22819300 | -0.62771100 |
| H | 5.95177100   | -5.84948900 | -2.36567000 |
| H | 7.10378700   | -5.49629100 | -1.09157400 |
| F | -14.75780600 | -5.57961200 | -0.08065100 |
| F | -16.57969100 | -3.65096400 | -0.04328300 |
| F | 16.57970200  | 3.65096100  | -0.04306900 |
| F | 14.75782200  | 5.57961400  | -0.08034900 |

## IPIC-4CI

|     |             |             |             |
|-----|-------------|-------------|-------------|
| 0 1 |             |             |             |
| C   | 12.64276000 | 2.67423600  | -0.03929300 |
| C   | 13.58848100 | 1.64167600  | -0.01948900 |
| C   | 14.94758000 | 1.95851900  | -0.02048400 |
| C   | 15.29582900 | 3.29975400  | -0.04126500 |
| C   | 14.33753300 | 4.31781900  | -0.06095800 |
| C   | 12.98724700 | 4.01523500  | -0.06014900 |
| C   | 11.28495700 | 2.09257600  | -0.03338100 |
| C   | 11.45053700 | 0.63131000  | -0.01020500 |
| C   | 12.87373900 | 0.34378700  | 0.00017100  |
| C   | 13.50638300 | -0.88681900 | 0.02587700  |
| O   | 10.24213000 | 2.73013400  | -0.04611400 |
| C   | -0.91918800 | 1.05324900  | 0.27248300  |
| C   | -1.33752600 | -0.29550200 | 0.24665100  |
| C   | -0.42946300 | -1.35887900 | 0.24617100  |
| C   | 0.91918800  | -1.05326000 | 0.27243200  |
| C   | 1.33752600  | 0.29549200  | 0.24669100  |
| C   | 0.42946400  | 1.35886900  | 0.24626300  |
| C   | -2.12860700 | 2.01324000  | 0.27835700  |
| C   | 2.12860600  | -2.01325200 | 0.27826800  |
| C   | -6.58690200 | -0.24599100 | -0.00662500 |
| C   | -6.89311900 | 1.13537000  | 0.00562200  |
| C   | -8.25525900 | 1.39202000  | 0.00644100  |
| C   | -9.02233300 | 0.21151200  | -0.00593900 |
| S   | -7.99539800 | -1.23665600 | -0.02060300 |
| N   | -5.73221600 | 1.88241900  | 0.03903300  |

|   |              |             |             |
|---|--------------|-------------|-------------|
| C | -2.77435600  | -0.28141200 | 0.17555400  |
| C | -3.27117000  | 1.00833900  | 0.15959400  |
| C | -4.68484300  | 0.98987700  | 0.05407500  |
| C | -5.19747900  | -0.33389700 | 0.01756700  |
| S | -3.95557000  | -1.54367200 | 0.08303100  |
| C | -5.70516300  | 3.33748500  | -0.00843000 |
| C | 6.58690600   | 0.24599700  | -0.00652800 |
| C | 6.89312400   | -1.13536400 | 0.00564200  |
| C | 8.25526300   | -1.39201300 | 0.00645900  |
| C | 9.02233700   | -0.21150500 | -0.00585000 |
| S | 7.99540100   | 1.23666400  | -0.02044500 |
| N | 5.73222000   | -1.88241600 | 0.03899700  |
| C | 2.77435800   | 0.28140600  | 0.17561500  |
| C | 3.27117200   | -1.00834300 | 0.15958600  |
| C | 4.68484600   | -0.98987600 | 0.05408400  |
| C | 5.19748300   | 0.33390100  | 0.01765800  |
| S | 3.95557200   | 1.54367200  | 0.08317700  |
| C | 5.70517100   | -3.33748000 | -0.00853400 |
| C | -2.06740900  | 2.91925700  | -0.96404300 |
| C | -2.16102900  | 2.76055700  | 1.62143100  |
| C | 2.16100300   | -2.76065200 | 1.62129600  |
| C | -2.02769300  | 4.31014400  | -0.91527800 |
| C | -1.95137900  | 5.06540400  | -2.08784000 |
| C | -1.92425100  | 4.46215000  | -3.34270900 |
| C | -1.97780500  | 3.06249000  | -3.38798500 |
| C | -2.04284700  | 2.30892500  | -2.22637200 |
| C | -3.16469400  | 2.53939400  | 2.56590000  |
| C | -3.15557200  | 3.19024900  | 3.79906600  |
| C | -2.14338700  | 4.08401400  | 4.14152200  |
| C | -1.13004400  | 4.29900800  | 3.20059900  |
| C | -1.13620500  | 3.65214600  | 1.97299000  |
| C | 1.13616400   | -3.65225300 | 1.97278700  |
| C | 1.12998900   | -4.29920400 | 3.20034600  |
| C | 2.14332900   | -4.08428600 | 4.14129400  |
| C | 3.15553000   | -3.19051800 | 3.79890400  |
| C | 3.16466600   | -2.53957200 | 2.56578300  |
| C | -1.83201600  | 5.27175300  | -4.60461300 |
| C | -2.13630200  | 4.79866500  | 5.46253400  |
| C | 2.13617600   | -4.79897900 | 5.46228300  |
| C | -5.63821400  | 3.95335900  | -1.41712200 |
| C | -6.51467500  | 3.22629100  | -2.43258500 |
| C | 5.63824600   | -3.95329100 | -1.41725500 |
| C | 6.51473700   | -3.22619100 | -2.43266800 |
| C | 1.83209700   | -5.27148400 | -4.60489500 |
| C | 2.02770000   | -4.31008400 | -0.91550200 |
| C | 1.95140700   | -5.06527700 | -2.08810700 |
| C | 1.92431000   | -4.46195300 | -3.34294300 |
| C | 1.97787600   | -3.06229100 | -3.38813900 |
| C | 2.04289800   | -2.30879100 | -2.22648200 |
| C | 2.06742800   | -2.91919400 | -0.96418800 |
| C | 10.42585300  | -0.29822000 | -0.00218200 |
| C | -10.42584900 | 0.29822700  | -0.00227500 |
| C | -12.64275000 | -2.67423000 | -0.03950600 |
| C | -13.58847300 | -1.64167300 | -0.01965700 |
| C | -14.94757200 | -1.95851900 | -0.02065200 |
| C | -15.29581800 | -3.29975500 | -0.04147800 |
| C | -14.33752000 | -4.31781700 | -0.06121800 |
| C | -12.98723500 | -4.01523000 | -0.06040900 |
| C | -11.28494900 | -2.09256800 | -0.03357700 |
| C | -11.45053200 | -0.63130400 | -0.01034600 |
| C | -12.87373400 | -0.34378400 | 0.00004200  |
| C | -13.50638400 | 0.88681900  | 0.02578100  |
| O | -10.24212000 | -2.73012300 | -0.04634900 |
| C | 12.83057100  | -2.13920300 | 0.04808600  |
| N | 12.32529200  | -3.18806400 | 0.06708700  |
| C | 14.92119900  | -1.04035300 | 0.03431100  |
| N | 16.07160400  | -1.21787600 | 0.04217000  |
| C | -4.85714900  | 8.67147600  | 0.48434700  |
| C | -5.65001200  | 7.78238400  | -0.46500400 |
| C | -5.23644400  | 6.31498800  | -0.39535200 |
| C | -6.03606800  | 5.43459600  | -1.35222500 |
| C | 4.85706800   | -8.67147700 | 0.48399500  |
| C | 5.64996400   | -7.78235600 | -0.46530100 |
| C | 5.23641700   | -6.31495700 | -0.39559600 |
| C | 6.03607700   | -5.43453700 | -1.35241200 |
| C | -12.83057700 | 2.13920600  | 0.04801500  |
| N | -12.32530700 | 3.18807100  | 0.06702700  |
| C | -14.92119900 | 1.04034700  | 0.03422700  |
| N | -16.07160600 | 1.21786100  | 0.04209500  |
| H | 15.74206000  | 1.22403800  | -0.00624400 |



|    |              |             |             |
|----|--------------|-------------|-------------|
| H  | 12.23672800  | 4.79818500  | -0.07518400 |
| H  | -0.78497500  | -2.38256800 | 0.19598500  |
| H  | 0.78497700   | 2.38256100  | 0.19614600  |
| H  | -8.72098200  | 2.37072100  | 0.01730100  |
| H  | -6.61401000  | 3.67724600  | 0.50209400  |
| H  | -4.85992900  | 3.67449800  | 0.59730600  |
| H  | 8.72098700   | -2.37071400 | 0.01727000  |
| H  | 6.61401100   | -3.67726200 | 0.50198900  |
| H  | 4.85992900   | -3.67452200 | 0.59717300  |
| H  | -2.06601000  | 4.82638300  | 0.03757300  |
| H  | -1.91845300  | 6.14996600  | -2.01525800 |
| H  | -1.96525400  | 2.55682400  | -4.35064900 |
| H  | -2.07842500  | 1.22463000  | -2.29680200 |
| H  | -3.96473700  | 1.83699100  | 2.35707700  |
| H  | -3.95450200  | 2.98829100  | 4.50823100  |
| H  | -0.31766700  | 4.98288700  | 3.43461900  |
| H  | -0.32808300  | 3.85656700  | 1.27905900  |
| H  | 0.32804900   | -3.85662300 | 1.27883300  |
| H  | 0.31760800   | -4.98309800 | 3.43430800  |
| H  | 3.95446700   | -2.98863300 | 4.50808100  |
| H  | 3.96472800   | -1.83717500 | 2.35701000  |
| H  | -1.94134200  | 6.34012200  | -4.40236400 |
| H  | -0.86547400  | 5.12247100  | -5.09902500 |
| H  | -2.60664000  | 4.98017900  | -5.32116100 |
| H  | -2.33659900  | 5.86829800  | 5.33295900  |
| H  | -2.89631700  | 4.39718300  | 6.13738900  |
| H  | -1.16293400  | 4.71201800  | 5.95580600  |
| H  | 2.33530700   | -5.86881100 | 5.33257900  |
| H  | 2.89691600   | -4.39827800 | 6.13678300  |
| H  | 1.16313500   | -4.71135300 | 5.95603800  |
| H  | -4.59797000  | 3.88549400  | -1.75963600 |
| H  | -6.40412500  | 3.69077500  | -3.41739500 |
| H  | -6.24052300  | 2.17203800  | -2.53109900 |
| H  | -7.57585000  | 3.27787300  | -2.16285900 |
| H  | 4.59800900   | -3.88539800 | -1.75978800 |
| H  | 6.40420600   | -3.69063500 | -3.41749900 |
| H  | 6.24059700   | -2.17193200 | -2.53114700 |
| H  | 7.57590500   | -3.27779300 | -2.16292000 |
| H  | 1.94142100   | -6.33986400 | -4.40270500 |
| H  | 0.86556100   | -5.12217500 | -5.09931300 |
| H  | 2.60673100   | -4.97986800 | -5.32141400 |
| H  | 2.06598900   | -4.82637600 | 0.03732100  |
| H  | 1.91847000   | -6.14984300 | -2.01558700 |
| H  | 1.96534900   | -2.55657100 | -4.35077500 |
| H  | 2.07848600   | -1.22449200 | -2.29685000 |
| H  | 10.73795400  | -1.33779400 | 0.01021900  |
| H  | -10.73795000 | 1.33780100  | 0.01017600  |
| H  | -15.74205300 | -1.22404100 | -0.00637800 |
| H  | -12.23671400 | -4.79817700 | -0.07547900 |
| H  | -5.17374500  | 9.71679100  | 0.41514000  |
| H  | -4.98647400  | 8.35294100  | 1.52469200  |
| H  | -3.78537600  | 8.63281200  | 0.25931800  |
| H  | -5.52837300  | 8.14193100  | -1.49563000 |
| H  | -6.72180600  | 7.86667100  | -0.24032700 |
| H  | -5.35454400  | 5.96565500  | 0.63946800  |
| H  | -4.16712400  | 6.22825000  | -0.62744400 |
| H  | -5.95174200  | 5.84959300  | -2.36546300 |
| H  | -7.10378500  | 5.49632500  | -1.09141200 |
| H  | 5.17364800   | -9.71679400 | 0.41474900  |
| H  | 4.98637800   | -8.35299000 | 1.52435800  |
| H  | 3.78530000   | -8.63278500 | 0.25894800  |
| H  | 5.52834200   | -8.14185800 | -1.49594500 |
| H  | 6.72175200   | -7.86666900 | -0.24060600 |
| H  | 5.35449700   | -5.96567000 | 0.63924200  |
| H  | 4.16710300   | -6.22819300 | -0.62771100 |
| H  | 5.95177100   | -5.84948900 | -2.36567000 |
| H  | 7.10378700   | -5.49629100 | -1.09157400 |
| Cl | -14.75780600 | -5.57961200 | -0.08065100 |
| Cl | -16.57969100 | -3.65096400 | -0.04328300 |
| Cl | 16.57970200  | 3.65096100  | -0.04306900 |
| Cl | 14.75782200  | 5.57961400  | -0.08034900 |

## References

1. A. Ali, M. I. Rafiq, Z. Zhang, J. Cao, R. Geng, B. Zhou and W. Tang, *Physical Chemistry Chemical Physics*, 2020, **22**, 7864-7874.
